# Supplementary material for: Pd(ii)-catalyzed enantioselective C–H olefination and photoregulation of sterically hindered diarylethenes
Source: Royal Society of Chemistry journal article supplement (doi:10.1039/d4sc05375c), 2024-01-01
Supplement: d4sc05375c1.pdf [file d4sc05375c1.pdf]

## Supporting Information

### **Pd(II)-Catalyzed Enantioselective C-H Olefination and Photoregulation of Sterically-Hindered Diarylethenes**

Guanlun Zhang ‡<sup>a</sup>, Xu Wu ‡<sup>b</sup>, Shiyu Mao <sup>b</sup>, Mengqi Li <sup>a\*</sup>, Honglong Hu <sup>a</sup>, Bing-Feng Shi <sup>b\*</sup>, Wei-Hong Zhu <sup>a\*</sup>

<sup>a</sup> Key Laboratory for Advanced Material, Joint International Research Laboratory of Precision Chemistry and Molecular Engineering, Feringa Nobel Prize Scientist Joint Research Center, Shanghai Key Laboratory of Functional Materials Chemistry, Institute of Fine Chemicals, Frontiers Science Center for Materiobiology and Dynamic Chemistry, School of Chemistry and Molecular Engineering, East China University of Science & Technology, Shanghai 200237, P. R. China

<sup>b</sup> Department Center of Chemistry for Frontier Technologies, Department of Chemistry, Zhejiang University, Hangzhou 310027, China

‡ These authors contributed equally to this work.

## Table of Contents

|                                                                                                                  |     |
|------------------------------------------------------------------------------------------------------------------|-----|
| 1. General Information .....                                                                                     | 3   |
| 2. Experiment Details and Characterization.....                                                                  | 4   |
| 2.1 Preparation of Substrates.....                                                                               | 4   |
| 2.2 General Procedure for the Enantioselective C-H Olefination.....                                              | 10  |
| 2.3 Synthetic Application.....                                                                                   | 29  |
| 3. Computational Data of BTTE and <b>1b</b> .....                                                                | 41  |
| 4. Crystallographic Data of <b>8</b> .....                                                                       | 42  |
| 5. 2D Spectra and <sup>13</sup> C NMR Assignments of <b>9</b> .....                                              | 44  |
| 6. Photochromic and Chiral Regulation Properties.....                                                            | 50  |
| 6.1 Absorption Changes of <b>10</b> and <b>11</b> .....                                                          | 50  |
| 6.2 Fatigue Resistance Experiments .....                                                                         | 50  |
| 6.3 Thermal Stability Tests .....                                                                                | 52  |
| 6.4 Conversion Ratio of <b>9</b> , <b>10</b> and <b>11</b> under UV Light Irradiation ( $\lambda = 313$ nm)..... | 53  |
| 6.5 CD Spectra of <b>10</b> and <b>11</b> .....                                                                  | 56  |
| 6.6 Experiments of Photocyclization and Photocycloreversion Quantum Yields .....                                 | 57  |
| 7. Measurements of the HTPs of <b>9</b> , <b>10</b> , <b>11</b> .....                                            | 58  |
| 8. NMR Spectra.....                                                                                              | 60  |
| 9. HPLC Charts .....                                                                                             | 171 |
| 10. References .....                                                                                             | 242 |

## 1. General Information

All the materials and solvents were purchased from commercial suppliers and used without additional purification. Pd(OAc)<sub>2</sub> was purchased from Laajoo (China). NMR spectra were recorded on a Bruke Avance operating for <sup>1</sup>H NMR at 400 MHz, <sup>13</sup>C NMR at 101 MHz, <sup>19</sup>F NMR at 376 MHz using TMS as internal standard. The peaks were internally referenced to CDCl<sub>3</sub> (7.26 ppm) or residual undeuterated solvent signal of CDCl<sub>3</sub> (77.16 ppm for <sup>13</sup>C NMR). The following abbreviations (or combinations thereof) were used to explain multiplicities: s = singlet, d = doublet, t = triplet, m = multiplet, brs = broad singlet. Mass spectroscopy data of the products were collected on an HRMS-TOF instrument. The ee value was determined on Shimadzu HPLC using CHIRALPAK column with hexane and 2-propanol as eluent, Wavelength = 254 nm. UV-Vis spectra were recorded on Agilent Cary 60 (1 cm quartz cell) at 293K. CD spectra were recorded using Jasco J-819 spectropolarimeter (1 cm quartz cell) at 293K. The photochromic reaction was conducted by continuous irradiation of an Hg/Xe lamp (Hamamatsu, LC8 Lightningcure, 200W) equipped with a narrow band interference filter (Shenyang HB optical Technology) for  $\lambda_{\text{irr}} = 313$  nm, a broad band interference filters (Anford) for  $\lambda_{\text{irr}} > 490$  nm, or a monochromator (monoscan 2000, OceanOptics) for  $\lambda_{\text{irr}} = 517 \pm 10$  nm. Quantum yields of photoisomerization were measure by the standard procedures using 1,2-bis(2-methyl-1-benzothiophene-3-yl)perfluorocyclopentene (BTF6) as the reference<sup>S1-S2</sup>. BTTE was prepared according to previous reference<sup>13</sup>.

## 2. Experiment Details and Characterization

### 2.1 Preparation of Substrates

#### 2.1.1 General procedure for the synthesis of olenfins:

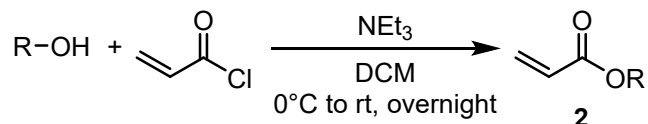

**General Procedure A:** In a round bottom flask, acryloyl chloride (1.2 equiv., 12 mmol) was added dropwise to a solution of corresponding alcohol (1.0 equiv., 10 mmol) and  $\text{NEt}_3$  (1.5 equiv., 15 mmol) in DCM (40 mL) at  $0^\circ\text{C}$  under argon atmosphere. After the addition was completed, the ice bath was removed, and the reaction mixture was stirred at room temperature overnight. Upon completion of the reaction, the reaction mixture was diluted with water and extracted with DCM. The combined organic layer was washed with saturated aqueous  $\text{NaHCO}_3$ . The organic layers were washed with brine, dried over anhydrous  $\text{Na}_2\text{SO}_4$ , concentrated in vacuo. The crude mixture was purified by silica gel column chromatography using petroleum ether: ethyl acetate as the eluent to afford the desired compound **2**.

Compound **2a**, **2k**, **2l**, **2m**, **2n**, **2o**, **2p**, **2q**, **2r**, **2s**, **2t**, **2u**, **2v**, **2w**, **2x**, **2y** are commercially available and were used directly without further purification.

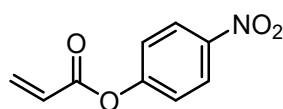

#### 4-nitrophenyl acrylate **2b**:

**2b** was prepared following **General Procedure A** and purified by flash in petroleum ether : ethyl acetate = 24 : 1 to give as white solid (1.73 g, 90% yield).

$^1\text{H NMR}$  (400 MHz,  $\text{CDCl}_3$ )  $\delta$  8.29 (d,  $J = 9.0$  Hz, 2 H), 7.34 (d,  $J = 9.1$  Hz, 2 H), 6.67 (d,  $J = 17.3$  Hz, 1 H), 6.34 (dd,  $J = 17.3, 10.5$  Hz, 1 H), 6.11 (d,  $J = 10.5$  Hz, 1 H). m.p.  $63.7\text{-}64.3^\circ\text{C}$

$^{13}\text{C NMR}$  (101 MHz,  $\text{CDCl}_3$ )  $\delta$  163.5, 155.3, 145.4, 134.0, 127.1, 125.2, 122.4.



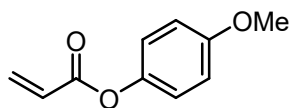

#### 4-methoxyphenyl acrylate 2c:

**2c** was prepared following **General Procedure A** and purified by flash in petroleum ether : ethyl acetate = 100 : 1 to give as colorless liquid (1.62 g, 91% yield).

**<sup>1</sup>H NMR (400 MHz, CDCl<sub>3</sub>)** δ 7.05 (d, *J* = 9.0 Hz, 2 H), 6.90 (d, *J* = 9.0 Hz, 2 H), 6.59 (d, *J* = 17.1 Hz, 1 H), 6.31 (dd, *J* = 17.3, 10.4 Hz, 1 H), 5.99 (d, *J* = 10.2 Hz, 1 H), 3.80 (s, 3 H).

**<sup>13</sup>C NMR (101 MHz, CDCl<sub>3</sub>)** δ 165.0, 157.3, 144.1, 132.4, 128.0, 122.3, 114.5, 55.6.

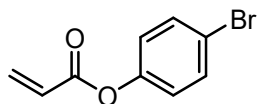

#### 4-bromophenyl acrylate 2d:

**2d** was prepared following **General Procedure A** and purified by flash in petroleum ether : ethyl acetate = 100 : 1 to give as colorless liquid (1.54 g, 68% yield).

**<sup>1</sup>H NMR (400 MHz, CDCl<sub>3</sub>)** δ 7.50 (d, *J* = 8.8 Hz, 2 H), 7.03 (d, *J* = 8.8 Hz, 2 H), 6.61 (d, *J* = 17.3 Hz, 1 H), 6.30 (dd, *J* = 17.3, 10.4 Hz, 1 H), 6.03 (d, *J* = 10.5 Hz, 1H).

**<sup>13</sup>C NMR (101 MHz, CDCl<sub>3</sub>)** δ 164.2, 149.6, 133.0, 132.5, 127.6, 123.4, 119.0.

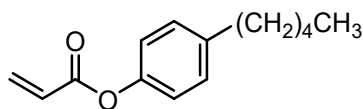

#### 4-pentylphenyl acrylate 2e:

**2e** was prepared following **General Procedure A** and purified by flash in petroleum ether : ethyl acetate = 100 : 1 to give as colorless liquid (1.96 g, 90% yield).

**<sup>1</sup>H NMR (400 MHz, CDCl<sub>3</sub>)** δ 7.18 (d, *J* = 8.2 Hz, 2 H), 7.03 (d, *J* = 8.5 Hz, 2 H), 6.59 (d, *J* = 17.4 Hz, 1 H), 6.31 (dd, *J* = 17.3, 10.4 Hz, 1 H), 5.99 (d, *J* = 10.5 Hz, 1 H), 2.64 - 2.55 (m, 2 H), 1.58 - 1.65 (m, 2 H), 1.37 - 1.29 (m, 4 H), 0.89 (t, *J* = 6.8 Hz, 3 H).

**<sup>13</sup>C NMR (101 MHz, CDCl<sub>3</sub>)** δ 164.8, 148.5, 140.6, 132.3, 129.3, 128.1, 121.1, 35.3, 31.5, 31.2, 22.5, 14.0.

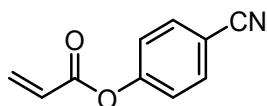

#### 4-cyanophenyl acrylate 2f:

**2f** was prepared following **General Procedure A** and purified by flash in petroleum ether : dichloromethane : ethyl acetate = 15 : 4 : 1 to give as white solid (0.91 g, 52% yield). m.p. 65.6-66.7°C.

**<sup>1</sup>H NMR (400 MHz, CDCl<sub>3</sub>)** δ 7.71 (d, *J* = 8.4 Hz, 2 H), 7.29 (d, *J* = 8.3 Hz, 2 H), 6.65 (d, *J* = 17.3 Hz, 1 H), 6.32 (dd, *J* = 17.3, 10.4 Hz, 1 H), 6.09 (d, *J* = 10.4 Hz, 1 H).

**<sup>13</sup>C NMR (101 MHz, CDCl<sub>3</sub>)** δ 163.6, 153.9, 133.9, 133.7, 127.3, 122.8, 118.3, 109.9.

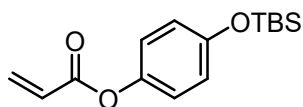

#### 4-((tert-butyldimethylsilyl)oxy)phenyl acrylate 2g:

In an oven-dried 100 mL two-necked round-bottom flask, under Ar atmosphere, hydroquinone (1.10 g, 10 mmol) was dissolved in EtOAc (50 mL). Imidazole (1.70 g, 25 mmol) and TBDMSCl (1.66 g, 11.0 mmol) were added to the solution and the resulting mixture was stirred for 4 h at 20 °C. The reaction was quenched by adding water and extracted with EtOAc for three times. The combined organic layers were washed brine, dried over Na<sub>2</sub>SO<sub>4</sub>, and concentrated in vacuo to afford the crude product without further purification.

In a round bottom flask, acryloyl chloride (948 μL, 12 mmol) was added dropwise to a solution of the crude product and NEt<sub>3</sub> (2.1 mL, 15 mmol) in DCM (40 mL) at 0 °C under argon atmosphere. After the addition was completed, the ice bath was removed, and the reaction mixture was stirred at room temperature overnight. Upon completion of the reaction, the reaction mixture was diluted with water and extracted with DCM. The combined organic layer was washed with saturated aqueous NaHCO<sub>3</sub>. The organic layers were washed with brine, dried over anhydrous Na<sub>2</sub>SO<sub>4</sub>, concentrated in vacuo. The crude mixture was purified by silica gel column chromatography using petroleum ether: ethyl acetate = 100 : 1 as the eluent to give **2g** as colorless liquid (1.09 g, 39%).

**<sup>1</sup>H NMR (400 MHz, CDCl<sub>3</sub>)** δ 6.99 (d, *J* = 8.9 Hz, 2 H), 6.83 (d, *J* = 8.9 Hz, 2 H), 6.58 (d, *J* = 17.3 Hz, 1 H), 6.30 (dd, *J* = 17.3, 10.5 Hz, 1 H), 5.98 (d, *J* = 10.4 Hz, 1 H), 0.98 (s, 9 H), 0.20 (s, 6 H).

**<sup>13</sup>C NMR (101 MHz, CDCl<sub>3</sub>)** δ 164.9, 153.4, 144.6, 132.4, 128.1, 122.2, 120.6, 25.7, 18.2, -4.4.

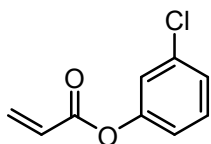

**3-chlorophenyl acrylate 2h:**

**2h** was prepared following **General Procedure A** and purified by flash in petroleum ether : ethyl acetate = 100 : 1 to give as colorless liquid(1.70 g, 93% yield).

**<sup>1</sup>H NMR (400 MHz, CDCl<sub>3</sub>)** δ 7.24 (d, *J* = 8.1 Hz, 1 H), 7.20 - 7.13 (m, 1 H), 7.11 (s, 1 H), 6.98 (d, *J* = 8.1 Hz, 1 H), 6.54 (d, *J* = 17.3 Hz, 1 H), 6.23 (dd, *J* = 17.2, 10.3 Hz, 1 H), 5.96 (d, *J* = 10.5 Hz, 1 H).

**<sup>13</sup>C NMR (101 MHz, CDCl<sub>3</sub>)** δ 163.1, 150.0, 133.7, 132.1, 129.1, 126.5, 125.2, 121.2, 118.9.

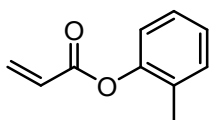

**o-tolyl acrylate 2i:**

**2i** was prepared following **General Procedure A** and purified by flash in petroleum ether : ethyl acetate = 100 : 1 to give as colorless liquid(1.08 g, 66% yield).

**<sup>1</sup>H NMR (400 MHz, CDCl<sub>3</sub>)** δ 7.31 - 7.17 (m, 3 H), 7.09 (d, *J* = 7.9 Hz, 1 H), 6.67 (d, *J* = 17.3 Hz, 1 H), 6.39 (dd, *J* = 17.3, 10.4 Hz, 1 H), 6.06 (d, *J* = 10.5 Hz, 1 H), 2.23 (s, 3 H).

**<sup>13</sup>C NMR (101 MHz, CDCl<sub>3</sub>)** δ 164.3, 149.2, 132.6, 131.2, 130.2, 127.8, 127.0, 126.1, 121.9, 16.2.

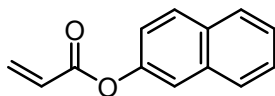

**naphthalen-2-yl acrylate 2j:**

**2j** was prepared following **General Procedure A** and purified by flash in petroleum ether : ethyl acetate = 50 : 1 to give as colorless liquid(1.78 g, 89% yield).

**<sup>1</sup>H NMR (400 MHz, CDCl<sub>3</sub>)** δ 7.89 - 7.77 (m, 3 H), 7.61 (d, *J* = 2.3 Hz, 1 H), 7.51 - 7.44 (m, 2 H), 7.31 - 7.22 (m, 1 H), 6.65 (d, *J* = 17.3 Hz, 1 H), 6.37 (dd, *J* = 17.3, 10.4 Hz, 1 H), 6.04 (d, *J* = 10.5 Hz, 1 H).

**<sup>13</sup>C NMR (101 MHz, CDCl<sub>3</sub>)** δ 164.8, 148.3, 133.8, 132.7, 131.5, 129.5, 128.0, 127.8, 127.7, 126.6, 125.8, 121.1, 118.6.

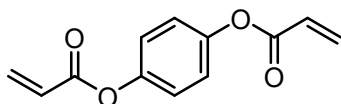

**1,4-phenylene diacrylate 2z:**

In a round bottom flask, acryloyl chloride (1.9 mL, 24 mmol) was added dropwise to a solution of hydroquinone (1.10 g, 10 mmol) and  $\text{NEt}_3$  (4.2 mL, 30 mmol) in DCM (40 mL) at 0 °C under argon atmosphere. After the addition was completed, the ice bath was removed, and the reaction mixture was stirred at room temperature overnight. Upon completion of the reaction, the reaction mixture was diluted with water and extracted with DCM. The combined organic layer was washed with saturated aqueous  $\text{NaHCO}_3$ . The organic layers were washed with brine, dried over anhydrous  $\text{Na}_2\text{SO}_4$ , concentrated in vacuo. The crude mixture was purified by silica gel column chromatography using petroleum ether: ethyl acetate = 100 : 1 as the eluent to give **2g** as white solid (1.92 g, 88%). m.p. 84.7-86.5°C.

$^1\text{H NMR}$  (400 MHz,  $\text{CDCl}_3$ )  $\delta$  7.16 (s, 4H), 6.61 (d,  $J = 17.4$  Hz, 2 H), 6.32 (dd,  $J = 17.3, 10.4$  Hz, 2 H), 6.02 (d,  $J = 10.4$  Hz, 2 H).

$^{13}\text{C NMR}$  (101 MHz,  $\text{CDCl}_3$ )  $\delta$  164.4, 148.1, 132.9, 127.8, 122.5.

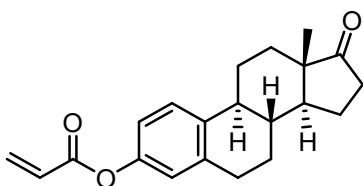

**(8R,9S,13S,14S)-13-methyl-17-oxo-7,8,9,11,12,13,14,15,16,17-decahydro-6H-cyclopenta[a]phenanthren-3-yl acrylate 2aa:**

**2aa** was prepared following **General Procedure A** and purified by flash in petroleum ether : ethyl acetate = 50 : 1 to give as colorless liquid (2.9 g, 88% yield).

$^1\text{H NMR}$  (400 MHz,  $\text{CDCl}_3$ )  $\delta$  7.30 (d,  $J = 8.5$  Hz, 1 H), 6.93 - 6.84 (m, 2 H), 6.59 (d,  $J = 17.3$  Hz, 1 H), 6.31 (dd,  $J = 17.3, 10.4$  Hz, 1 H), 6.00 (d,  $J = 10.1$  Hz, 1 H), 2.95 - 2.88 (m, 2 H), 2.51 (dd,  $J = 18.8, 8.6$  Hz, 1 H), 2.44 - 2.39 (m, 1 H), 2.29 (td,  $J = 11.0, 4.1$  Hz, 1 H), 2.21 - 1.91 (m, 4 H), 1.70 - 1.38 (m, 6 H), 0.91 (s, 3 H).

$^{13}\text{C NMR}$  (101 MHz,  $\text{CDCl}_3$ )  $\delta$  220.9, 164.9, 148.5, 138.1, 137.5, 132.5, 128.1, 126.5, 121.6, 118.8, 50.5, 48.0, 44.2, 38.0, 35.9, 31.6, 29.5, 26.4, 25.8, 21.7, 13.9.

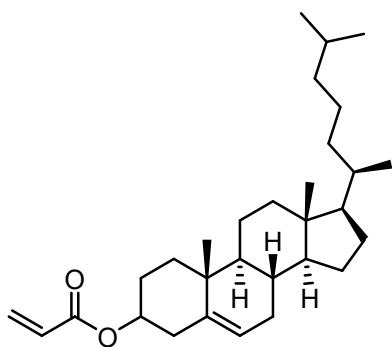

**(8S,9S,10R,13R,14S,17R)-10,13-dimethyl-17-((R)-6-methylheptan-2-yl)-2,3,4,7,8,9,10,11,12,13,14,15,16,17-tetradecahydro-1H-cyclopenta[a]phenanthren-3-yl acrylate 2ab:**

**2ab** was prepared following **General Procedure A** and purified by flash in petroleum ether : ethyl acetate = 50 : 1 to give as white solid (3.79 g, 86% yield). m.p. 122.5-124.1°C.

**<sup>1</sup>H NMR (400 MHz, CDCl<sub>3</sub>)** δ 6.42 (d, *J* = 17.4 Hz, 1 H), 6.14 (dd, *J* = 17.3, 10.4 Hz, 1 H), 5.83 (d, *J* = 10.4 Hz, 1 H), 5.42 (d, *J* = 5.0 Hz, 1 H), 4.73 (tq, *J* = 11.5, 4.4 Hz, 1 H), 2.40 (d, *J* = 8.0 Hz, 2 H), 2.09 - 1.80 (m, 5 H), 1.74 - 0.98 (m, 24 H), 0.95 (d, *J* = 6.5 Hz, 3 H), 0.90 (d, *J* = 6.6 Hz, 6 H), 0.71 (s, 3 H).

**<sup>13</sup>C NMR (101 MHz, CDCl<sub>3</sub>)** δ 165.7, 139.6, 130.3, 129.1, 122.8, 74.2, 56.7, 56.2, 50.1, 42.3, 39.8, 39.6, 38.2, 37.0, 36.7, 36.2, 35.9, 32.0, 31.9, 28.3, 28.1, 27.8, 24.3, 23.9, 22.9, 22.6, 21.1, 19.4, 18.8, 11.9.

## 2.2 General Procedure for the Enantioselective C-H Olefination.

Note: Because of the coexistence of parallel conformer and anti-parallel conformer of sterically hindered diarylethenes, the integrals of some H-atoms may not be integers in  $^1\text{H NMR}$  spectra. But the sum of the integrals of H atoms is integers for the parallel and anti-parallel conformer at the same position.

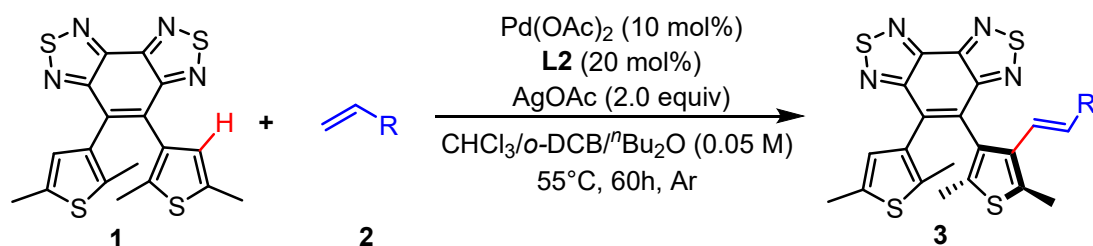

A 10 mL Schlenk tube was added **1** (41.4 mg, 0.10 mmol), **2** (0.15 mmol), **L2** (14.4 mg, 20 mol%),  $\text{AgOAc}$  (33.4 mg, 0.20 mmol),  $\text{Pd}(\text{OAc})_2$  (2.2 mg, 10 mol%) and  $\text{CHCl}_3/o\text{-DCB}/n\text{Bu}_2\text{O}$  (0.67 mL/0.67 mL/0.67 mL). The reaction mixture was stirred at  $55^\circ\text{C}$  (aluminum heat transfer block) for 60 h in the dark. After cooling to room temperature, the mixture was diluted with dichloromethane, filtrated through celite. After concentration, the resulting residue was purified by preparative TLC using Hexane/EtOAc/DCM or Hexane/Acetone/DCM as the eluent to afford the desired product.

**Table S1.** Screening of Ag salt.

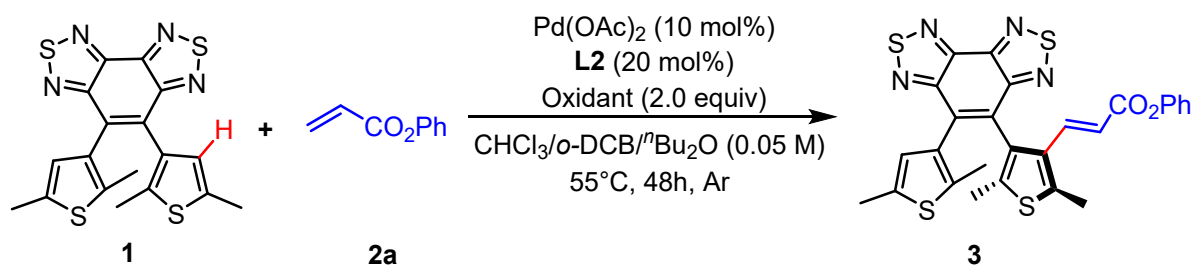

| Entry | Oxidant                  | Yield <sup>b</sup> (%) | er <sup>c</sup> |
|-------|--------------------------|------------------------|-----------------|
| 1     | $\text{AgOAc}$           | 78                     | 95:5            |
| 2     | $\text{Ag}_2\text{CO}_3$ | 16                     | 90:10           |
| 3     | $\text{Ag}_3\text{PO}_4$ | 10                     | 91:9            |
| 4     | $\text{AgTFA}$           | 39                     | 50:50           |
| 5     | $\text{AgNO}_3$          | 22                     | 75.5:24.5       |
| 6     | $\text{PhCO}_2\text{Ag}$ | 71                     | 83.5:16.5       |
| 7     | $\text{Ag}_2\text{SO}_4$ | 17                     | 90:10           |
| 8     | $\text{Ag}_2\text{O}$    | N.R.                   | -               |
| 9     | $\text{AgBF}_4$          | N.R.                   | -               |

<sup>a</sup>Reaction conditions: **1** (0.10 mmol), **2a** (0.15 mmol),  $\text{Pd}(\text{OAc})_2$  (10 mol %), **L2** (20 mol %), Oxidant (2.0 equiv) in solvent (2 mL),  $55^\circ\text{C}$ , 48 h, under Ar. <sup>b</sup>Isolated yield. <sup>c</sup>The er value was determined by chiral HPLC. *o*-DCB = 1,2-dichlorobenzene.

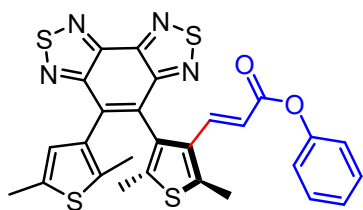

**Phenyl (E)-3-(4-(5-(2,5-dimethylthiophen-3-yl)benzo[1,2-c:3,4-c']bis([1,2,5]thiadiazole)-4-yl)-2,5-dimethylthiophen-3-yl)acrylate 3a:**

A purification by flash chromatography in petroleum ether : dichloromethane : ethyl acetate = 15 : 4 : 1 to give **3a** as red oil (47.7 mg, 85%). The ee value was determined by HPLC analysis on a Chiralcel IF-3 column (hexane/isopropanol = 97/3, flow = 1.0 mL/min, 254 nm) with  $t_r$  = 9.0 min (major), 10.7 min (minor): 95.5 : 4.5 er.  $[\alpha]_D^{20}$  = 110.0 (c = 1.0, CHCl<sub>3</sub>)

**<sup>1</sup>H NMR (400 MHz, CDCl<sub>3</sub>)**  $\delta$  7.45 (d,  $J$  = 16 Hz, 1 H), 7.43 (d,  $J$  = 16 Hz, 1 H), 7.27 - 7.34 (m, 4 H), 7.13 - 7.21 (m, 2 H), 6.92 - 7.02 (m, 4 H), 6.44 (s, 1 H), 6.30 (s, 1 H), 5.86 (d,  $J$  = 16.1 Hz, 1 H), 5.81 (d,  $J$  = 16 Hz, 1 H), 2.62 (s, 3 H), 2.58 (s, 3 H), 2.36 (s, 6 H), 2.14 (s, 3 H), 2.11 (s, 3 H), 2.10 (s, 3 H), 2.06 (s, 3 H). ap/p=46/54.

**<sup>13</sup>C NMR (101 MHz, CDCl<sub>3</sub>)**  $\delta$  165.7, 165.6, 156.8, 156.8, 156.7, 150.7, 150.6, 147.7, 147.4, 140.0, 139.9, 139.6, 139.4, 137.3, 136.8, 135.9, 135.8, 135.2, 134.7, 132.9, 132.9, 132.7, 132.5, 131.5, 131.3, 131.0, 130.6, 129.9, 129.9, 129.4, 127.5, 126.5, 125.7, 121.5, 117.1, 116.6, 15.6, 15.5, 15.3, 15.2, 14.9, 14.4, 14.4.

**HRMS (ESI)** m/z:  $[M+Na]^+$  Calculated for C<sub>27</sub>H<sub>20</sub>N<sub>4</sub>O<sub>2</sub>S<sub>4</sub>Na<sup>+</sup>: 583.0361; found: 583.0363.

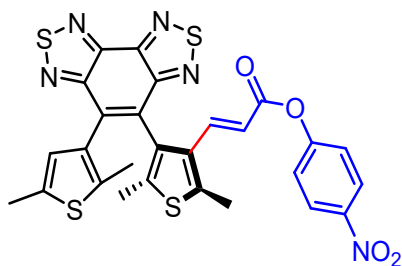

**4-nitrophenyl (E)-3-(4-(5-(2,5-dimethylthiophen-3-yl)benzo[1,2-c:3,4-c']bis([1,2,5]thiadiazole)-4-yl)-2,5-dimethylthiophen-3-yl)acrylate 3b:**

A purification by flash chromatography in petroleum ether : dichloromethane : ethyl acetate = 15 : 4 : 1 to give **3b** as red oil (42.4 mg, 70%). The ee value was determined by HPLC analysis on a Chiralcel IF-3 column (hexane/isopropanol = 97/3, flow = 1.0 mL/min, 254 nm) with  $t_r$  = 35.2 min (major), 42.2 min (minor): 93.5 : 6.5 er.  $[\alpha]_D^{20}$  = 127.6 (c = 1.0, CHCl<sub>3</sub>)

**<sup>1</sup>H NMR (400 MHz, CDCl<sub>3</sub>)**  $\delta$  8.21 (m, 4 H), 7.52 (d,  $J$  = 16.1 Hz, 1 H), 7.42 (d,  $J$  = 16.1 Hz, 1 H), 7.18 (m, 4 H), 6.40 (s, 1 H), 6.31 (s, 1 H), 5.86 (d,  $J$  = 16.1 Hz, 1 H), 5.79 (d,  $J$  = 16.1 Hz, 1 H), 2.64 (s, 3 H), 2.60 (s, 3 H), 2.37 (s, 3 H), 2.34 (s, 3 H), 2.12 (s, 6 H), 2.11 (s, 3 H), 2.06 (s, 3 H). ap/p=42/58.

$^{13}\text{C}$  NMR (101 MHz,  $\text{CDCl}_3$ )  $\delta$  164.7, 164.6, 156.7, 156.7, 156.6, 155.4, 155.4, 147.6, 147.3, 147.3, 145.1, 145.1, 141.2, 141.0, 140.8, 140.6, 137.1, 137.0, 136.0, 135.8, 135.5, 135.0, 132.9, 132.8, 132.7, 132.3, 131.2, 131.0, 130.8, 130.5, 129.7, 127.2, 126.5, 125.2, 122.4, 122.3, 115.6, 115.0, 15.7, 15.5, 15.3, 15.2, 15.2, 14.9, 14.4, 14.3.

HRMS (ESI)  $m/z$ :  $[\text{M}+\text{Na}]^+$  Calculated for  $\text{C}_{27}\text{H}_{19}\text{N}_5\text{O}_4\text{S}_4\text{Na}^+$ : 628.0212; found: 628.0213.

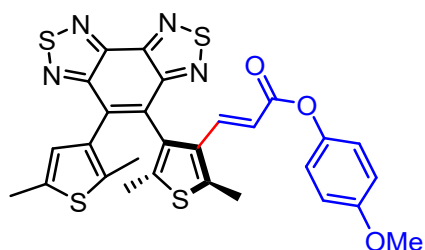

**4-methoxyphenyl (E)-3-(4-(5-(2,5-dimethylthiophen-3-yl)benzo[1,2-c:3,4-c']bis([1,2,5]thiadiazole)-4-yl)-2,5-dimethylthiophen-3-yl)acrylate 3c:**

A purification by flash chromatography in petroleum ether : dichloromethane : ethyl acetate = 15 : 4 : 1 to give **3c** as red oil (40.2 mg, 68%). The ee value was determined by HPLC analysis on a Chiralcel IF-3 column (hexane/isopropanol = 90/10, flow = 1.0 mL/min, 254 nm) with  $t_r$  = 11.2 min (major), 13.8 min (minor): 95 : 5 er.  $[\alpha]_D^{20}$  = 108.6 (c = 1.0,  $\text{CHCl}_3$ )

$^1\text{H}$  NMR (400 MHz,  $\text{CDCl}_3$ )  $\delta$  7.44 (d,  $J$  = 16 Hz, 1 H), 7.35 (d,  $J$  = 16 Hz, 1 H), 6.78 - 6.94 (m, 8 H), 6.44 (s, 1 H), 6.30 (s, 1 H), 5.85 (d,  $J$  = 16.1 Hz, 1 H), 5.79 (d,  $J$  = 16.1 Hz, 1 H), 3.77 (s, 3 H), 3.76 (s, 3 H), 2.61 (s, 3 H), 2.58 (s, 3 H), 2.36 (s, 6 H), 2.13 (s, 3 H), 2.10 (s, 6 H), 2.06 (s, 3 H).  $ap/p=43/57$ .

$^{13}\text{C}$  NMR (101 MHz,  $\text{CDCl}_3$ )  $\delta$  166.0, 166.0, 157.1, 156.8, 156.7, 156.6, 147.6, 147.3, 147.3, 144.1, 144.0, 140.0, 139.8, 139.4, 139.2, 137.3, 136.8, 135.9, 135.7, 135.1, 134.6, 132.8, 132.8, 132.7, 132.4, 131.5, 131.3, 130.9, 130.5, 129.9, 129.8, 127.4, 126.5, 122.2, 117.1, 116.6, 114.4, 55.6, 15.6, 15.4, 15.3, 15.2, 14.8, 14.4, 14.3, 14.2.

HRMS (ESI)  $m/z$ :  $[\text{M}+\text{H}]^+$  Calculated for  $\text{C}_{28}\text{H}_{23}\text{N}_4\text{O}_3\text{S}_4^+$ : 591.0647; found: 591.0650.

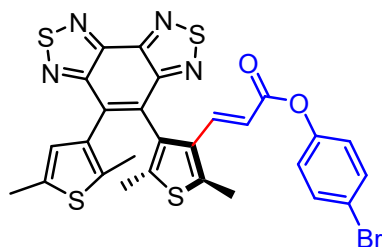

**4-bromophenyl (E)-3-(4-(5-(2,5-dimethylthiophen-3-yl)benzo[1,2-c:3,4-c']bis([1,2,5]thiadiazole)-4-yl)-2,5-dimethylthiophen-3-yl)acrylate 3d:**

A purification by flash chromatography in petroleum ether : dichloromethane : ethyl acetate = 15 : 4 : 1 to give **3d** as red oil (27.5 mg, 43%). The ee value was determined by HPLC analysis on a Chiralcel IF-3 column (hexane/isopropanol =



97/3, flow = 1.0 mL/min, 254 nm) with tr = 12.6 min (major), 17.7 min (minor): 94 : 6 er.  $[\alpha]_D^{20} = 101.5$  (c = 1.0, CHCl<sub>3</sub>)

**<sup>1</sup>H NMR (400 MHz, CDCl<sub>3</sub>)** δ 7.33 - 7.50 (m, 6 H), 6.82 - 6.94 (m, 4 H), 6.41 (s, 1 H), 6.30 (s, 1 H), 5.84 (d, *J* = 16.1 Hz, 1 H), 5.78 (d, *J* = 16.1 Hz, 1 H), 2.62 (s, 3 H), 2.58 (s, 3 H), 2.36 (s, 3 H), 2.34 (s, 3 H), 2.11 (s, 3 H), 2.10 (s, 6 H), 2.06 (s, 3 H). ap/p=43/57.

**<sup>13</sup>C NMR (101 MHz, CDCl<sub>3</sub>)** δ 165.3, 165.3, 156.8, 156.7, 156.7, 156.6, 149.6, 149.6, 147.6, 147.3, 140.4, 140.2, 140.0, 139.7, 137.2, 136.9, 135.9, 135.8, 135.3, 134.8, 132.9, 132.8, 132.7, 132.4, 131.3, 131.1, 130.9, 130.5, 129.8, 129.7, 127.3, 126.5, 123.3, 123.3, 118.8, 118.8, 116.5, 115.9, 15.6, 15.4, 15.3, 15.2, 14.9, 14.4, 14.3.

**HRMS (ESI) m/z:** [M+H]<sup>+</sup> Calculated for C<sub>27</sub>H<sub>20</sub>BrN<sub>4</sub>O<sub>2</sub>S<sub>4</sub><sup>+</sup>: 638.9647; found: 638.9644.

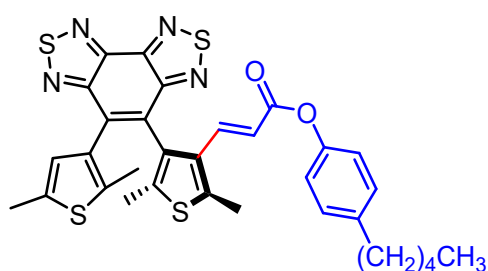

**4-pentylphenyl (E)-3-(4-(5-(2,5-dimethylthiophen-3-yl)benzo[1,2-c:3,4-c']bis([1,2,5]thiadiazole)-4-yl)-2,5-dimethylthiophen-3-yl)acrylate 3e:**

A purification by flash chromatography in petroleum ether : dichloromethane : ethyl acetate = 15 : 4 : 1 to give **3e** as red oil (40.4 mg, 64%). The ee value was determined by HPLC analysis on a Chiralcel IF-3 column (hexane/isopropanol = 97/3, flow = 1.0 mL/min, 254 nm) with tr = 12.6 min (major), 15.7 min (minor): 94.5 : 5.5 er.  $[\alpha]_D^{20} = 107.3$  (c = 1.0, CHCl<sub>3</sub>)

**<sup>1</sup>H NMR (400 MHz, CDCl<sub>3</sub>)** δ 7.43 (d, *J* = 16 Hz, 1 H), 7.36 (d, *J* = 16 Hz, 1 H), 7.07 - 7.15 (m, 4 H), 6.82 - 6.92 (m, 4 H), 6.45 (s, 1 H), 6.29 (s, 1 H), 5.87 (d, *J* = 16.1 Hz, 1 H), 5.81 (d, *J* = 16.1 Hz, 1 H), 2.61 (s, 3 H), 2.58 (s, 3 H), 2.50 - 2.56 (m, 4 H), 2.36 (s, 6 H), 2.13 (s, 3 H), 2.10 (s, 3 H), 2.09 (s, 3 H), 2.07 (s, 3 H), 1.51 - 1.61 (m, 4 H), 1.2 - 1.35 (m, 8 H), 0.82 - 0.92 (m, 6 H). ap/p=43/57.

**<sup>13</sup>C NMR (101 MHz, CDCl<sub>3</sub>)** δ 165.8, 165.7, 156.8, 156.7, 156.6, 148.4, 148.4, 147.6, 147.3, 147.3, 140.4, 140.3, 139.8, 139.7, 139.3, 139.1, 137.3, 136.7, 135.8, 135.7, 135.1, 134.6, 132.8, 132.8, 132.7, 132.4, 131.4, 131.2, 130.9, 130.5, 129.8, 129.8, 129.2, 127.4, 126.4, 121.0, 117.2, 116.7, 35.3, 31.4, 31.1, 22.5, 15.5, 15.4, 15.2, 15.2, 14.8, 14.3, 14.1, 14.0.

**HRMS (ESI) m/z:** [M+H]<sup>+</sup> Calculated for C<sub>32</sub>H<sub>31</sub>N<sub>4</sub>O<sub>2</sub>S<sub>4</sub><sup>+</sup>: 631.1324; found: 631.1326.

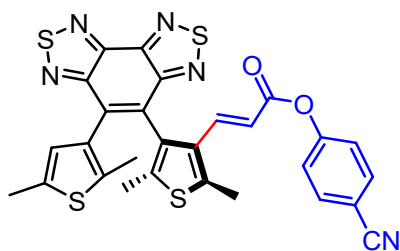

**4-cyanophenyl (*E*)-3-(4-(5-(2,5-dimethylthiophen-3-yl)benzo[1,2-*c*:3,4-*c'*]bis([1,2,5]thiadiazole)-4-yl)-2,5-dimethylthiophen-3-yl)acrylate 3f:**

A purification by flash chromatography in petroleum ether : dichloromethane : ethyl acetate = 7 : 2 : 1 to give **3f** as red oil (32.7 mg, 56%). The ee value was determined by HPLC analysis on a Chiralcel IF-3 column (hexane/isopropanol = 90/10, flow = 1.0 mL/min, 254 nm) with  $t_r$  = 15.3 min (major), 17.9 min (minor): 93.5 : 6.5 er.  $[\alpha]_D^{20}$  = 158.6 (c = 1.0, CHCl<sub>3</sub>)

**<sup>1</sup>H NMR (400 MHz, CDCl<sub>3</sub>)** δ 7.59 - 7.66 (m, 4 H), 7.52 (d,  $J$  = 16 Hz, 1 H), 7.40 (d,  $J$  = 16 Hz, 1 H), 7.07 - 7.17 (m, 4 H), 6.39 (s, 1 H), 6.30 (s, 1 H), 5.84 (d,  $J$  = 16.1 Hz, 1 H), 5.77 (d,  $J$  = 16.1 Hz, 1 H), 2.63 (s, 3 H), 2.59 (s, 3 H), 2.36 (s, 3 H), 2.34 (s, 3 H), 2.12 (s, 6 H), 2.11 (s, 3 H), 2.06 (s, 3 H). ap/p=43/57.

**<sup>13</sup>C NMR (101 MHz, CDCl<sub>3</sub>)** δ 164.8, 164.7, 156.8, 156.7, 156.6, 154.0, 154.0, 147.6, 147.4, 141.0, 140.8, 140.6, 140.5, 137.2, 137.0, 136.0, 135.8, 135.5, 135.0, 133.6, 133.0, 132.9, 132.7, 132.4, 131.3, 131.1, 130.9, 130.6, 129.7, 127.2, 126.5, 122.7, 122.7, 118.3, 115.8, 115.2, 109.6, 109.6, 15.7, 15.5, 15.3, 15.2, 15.0, 14.4, 14.3.

**HRMS (ESI)  $m/z$ :** [M+H]<sup>+</sup> Calculated for C<sub>28</sub>H<sub>20</sub>N<sub>5</sub>O<sub>2</sub>S<sub>4</sub><sup>+</sup>: 586.0494; found: 586.0498.

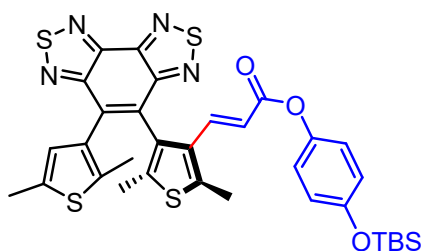

**4-((tert-butyl)dimethylsilyloxy)phenyl (*E*)-3-(4-(5-(2,5-dimethylthiophen-3-yl)benzo[1,2-*c*:3,4-*c'*]bis([1,2,5]thiadiazole)-4-yl)-2,5-dimethylthiophen-3-yl)acrylate 3g:**

A purification by flash chromatography in petroleum ether : dichloromethane : ethyl acetate = 15 : 4 : 1 to give **3g** as red oil (60.8 mg, 88%). The ee value was determined by HPLC analysis on a Chiralcel IF-3 column (hexane/isopropanol = 95/5, flow = 1.0 mL/min, 254 nm) with  $t_r$  = 5.3 min (major), 7.6 min (minor): 95 : 5 er.  $[\alpha]_D^{20}$  = 153.8 (c = 1.0, CHCl<sub>3</sub>)

**<sup>1</sup>H NMR (400 MHz, CDCl<sub>3</sub>)** δ 7.43 (d,  $J$  = 16.2 Hz, 1 H), 7.34 (d,  $J$  = 16.2 Hz, 1 H), 6.70 - 6.89 (m, 8 H), 6.44 (s, 1 H), 6.30 (s, 1 H), 5.85 (d,  $J$  = 16.1 Hz, 1 H), 5.79 (d,  $J$  = 16.1 Hz, 1 H), 2.61 (s, 3 H), 2.57 (s, 3 H), 2.36 (s, 6 H), 2.13 (s, 3 H), 2.10 (s, 3 H), 2.06 (s, 6 H), 0.95 (m, 18 H), 0.16 (m, 12 H). ap/p=46/54.

**<sup>13</sup>C NMR (101 MHz, CDCl<sub>3</sub>)** δ 165.9, 165.9, 156.8, 156.8, 156.7, 153.2, 147.7, 147.4, 144.6, 144.6, 139.9, 139.7, 139.4,

139.2, 137.3, 136.8, 135.9, 135.8, 135.2, 134.7, 132.9, 132.9, 132.7, 132.5, 131.6, 131.4, 131.0, 130.6, 130.0, 129.9, 127.5, 126.5, 122.1, 120.5, 117.3, 116.8, 25.7, 18.2, 15.6, 15.5, 15.3, 15.2, 14.9, 14.4, 14.4, -4.4.

**HRMS (ESI) m/z:** [M+H]<sup>+</sup> Calculated for C<sub>33</sub>H<sub>35</sub>N<sub>4</sub>O<sub>3</sub>S<sub>4</sub>Si<sup>+</sup>: 691.1356; found: 691.1359.

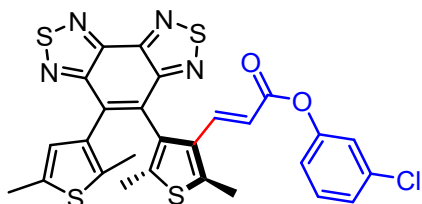

**3-chlorophenyl (E)-3-(4-(5-(2,5-dimethylthiophen-3-yl)benzo[1,2-c:3,4-c']bis([1,2,5]thiadiazole)-4-yl)-2,5-dimethylthiophen-3-yl)acrylate 3h:**

A purification by flash chromatography in petroleum ether : dichloromethane : ethyl acetate = 15 : 4 : 1 to give **3h** as red oil (34.0 mg, 57%). The ee value was determined by HPLC analysis on a Chiralcel IF-3 column (hexane/isopropanol = 97/3, flow = 1.0 mL/min, 254 nm) with tr = 9.3 min (major), 10.8 min (minor): 94 : 6 er. [ $\alpha$ ]<sub>D</sub><sup>20</sup> = 159.8 (c = 1.0, CHCl<sub>3</sub>)

**<sup>1</sup>H NMR (400 MHz, CDCl<sub>3</sub>)**  $\delta$  7.46 (d, *J* = 16 Hz, 1 H), 7.37 (d, *J* = 16 Hz, 1 H), 7.20 - 7.26 (m, 4 H), 6.98 - 7.07 (m, 2 H), 6.85 - 6.94 (m, 2 H), 6.42 (s, 1 H), 6.30 (s, 1 H), 5.85 (d, *J* = 16.1 Hz, 1 H), 5.78 (d, *J* = 16.1 Hz, 1 H), 2.62 (s, 3 H), 2.58 (s, 3 H), 2.36 (s, 6 H), 2.12 (s, 3 H), 2.10 (s, 6 H), 2.06 (s, 3 H). ap/p=46/54.

**<sup>13</sup>C NMR (101 MHz, CDCl<sub>3</sub>)**  $\delta$  165.2, 165.2, 156.8, 156.7, 156.7, 156.6, 151.1, 151.0, 147.6, 147.3, 140.5, 140.3, 140.0, 139.8, 137.2, 136.9, 135.9, 135.8, 135.3, 134.8, 134.6, 132.9, 132.8, 132.7, 132.4, 131.3, 131.1, 130.9, 130.5, 130.1, 129.8, 129.7, 127.3, 126.5, 126.0, 126.0, 122.2, 120.0, 119.9, 116.4, 115.8, 15.6, 15.5, 15.3, 15.2, 14.9, 14.4, 14.3.

**HRMS (ESI) m/z:** [M+H]<sup>+</sup> Calculated for C<sub>27</sub>H<sub>20</sub>N<sub>4</sub>O<sub>2</sub>S<sub>4</sub>Cl<sup>+</sup>: 595.0152; found: 595.0157.

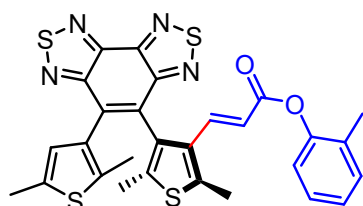

**o-tolyl (E)-3-(4-(5-(2,5-dimethylthiophen-3-yl)benzo[1,2-c:3,4-c']bis([1,2,5]thiadiazole)-4-yl)-2,5-dimethylthiophen-3-yl)acrylate 3i:**

A purification by flash chromatography in petroleum ether : dichloromethane : ethyl acetate = 15 : 4 : 1 to give **3i** as red oil (38.5 mg, 67%). The ee value was determined by HPLC analysis on a Chiralcel IBN-5 column (hexane/isopropanol = 90/10, flow = 1.0 mL/min, 254 nm) with tr = 8.8 min (major), 9.7 min (minor): 88.5 : 11.5 er. [ $\alpha$ ]<sub>D</sub><sup>20</sup> = 107.2 (c = 1.0, CHCl<sub>3</sub>)

**<sup>1</sup>H NMR (400 MHz, CDCl<sub>3</sub>)** δ 7.50 (d, *J* = 16 Hz, 1 H), 7.41 (d, *J* = 16 Hz, 1 H), 7.04 - 7.19 (m, 6 H), 6.84 - 6.93 (m, 2 H), 6.41 (s, 1 H), 6.34 (s, 1 H), 5.90 (d, *J* = 16.1 Hz, 1 H), 5.84 (d, *J* = 16.1 Hz, 1 H), 2.63 (s, 3 H), 2.60 (s, 3 H), 2.37 (s, 3 H), 2.36 (s, 3 H), 2.13 (s, 3 H), 2.12 (s, 3 H), 2.09 (s, 3 H), 2.06 (s, 3 H), 2.00 (s, 3 H), 1.98 (s, 3 H). ap/p=46/54.

**<sup>13</sup>C NMR (101 MHz, CDCl<sub>3</sub>)** δ 165.4, 156.8, 156.8, 156.7, 156.7, 149.2, 149.2, 147.6, 147.6, 147.3, 147.3, 140.2, 140.1, 139.5, 139.3, 137.2, 136.7, 135.9, 135.8, 135.2, 134.7, 132.9, 132.9, 132.7, 132.4, 131.4, 131.2, 131.1, 131.0, 130.5, 130.1, 130.0, 129.9, 129.9, 127.2, 126.9, 126.6, 125.9, 121.7, 121.7, 116.7, 116.2, 16.1, 16.1, 15.6, 15.5, 15.3, 15.3, 15.2, 14.9, 14.4, 14.3.

**HRMS (ESI) m/z:** [M+H]<sup>+</sup> Calculated for C<sub>28</sub>H<sub>23</sub>N<sub>4</sub>O<sub>2</sub>S<sub>4</sub><sup>+</sup>: 575.0698; found: 575.0699.

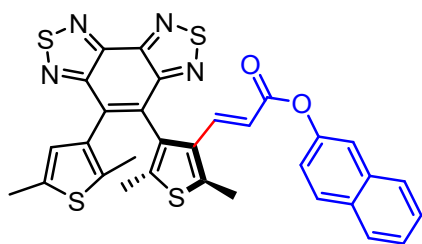

**naphthalen-2-yl (E)-3-(4-(5-(2,5-dimethylthiophen-3-yl)benzo[1,2-*c*:3,4-*c'*]bis([1,2,5]thiadiazole)-4-yl)-2,5-dimethylthiophen-3-yl)acrylate 3j:**

A purification by flash chromatography in petroleum ether : dichloromethane : ethyl acetate = 17 : 2 : 1 to give **3j** as red oil (41.5 mg, 68%). The ee value was determined by HPLC analysis on a Chiralcel IF-3 column (hexane/isopropanol = 97/3, flow = 1.0 mL/min, 254 nm) with *t<sub>r</sub>* = 25.8 min (major), 29.6 min (minor): 95 : 5 er. [α]<sub>D</sub><sup>20</sup> = 165.8 (c = 1.0, CHCl<sub>3</sub>)

**<sup>1</sup>H NMR (400 MHz, CDCl<sub>3</sub>)** δ 7.70 - 7.85 (m, 6 H), 7.38 - 7.56 (m, 8 H), 7.13 (dd, *J* = 8.9, 2.3 Hz, 1 H), 7.10 (dd, *J* = 8.9, 2.3 Hz, 1 H), 6.47 (s, 1 H), 6.31 (s, 1 H), 5.92 (d, *J* = 16.1 Hz, 1 H), 5.86 (d, *J* = 16.1 Hz, 1 H), 2.64 (s, 3 H), 2.60 (s, 3 H), 2.38 (s, 3 H), 2.37 (s, 3 H), 2.17 (s, 3 H), 2.11 (s, 3 H), 2.07 (s, 6 H). ap/p=44/56.

**<sup>13</sup>C NMR (101 MHz, CDCl<sub>3</sub>)** δ 165.8, 165.8, 156.8, 156.8, 156.7, 156.6, 148.6, 148.2, 147.6, 147.3, 147.3, 140.2, 140.0, 139.7, 139.5, 137.3, 136.8, 135.9, 135.8, 135.2, 134.7, 133.7, 132.9, 132.8, 132.7, 132.4, 131.5, 131.4, 131.3, 131.0, 130.5, 129.9, 129.8, 129.3, 127.8, 127.6, 127.4, 126.6, 126.5, 125.7, 121.1, 118.4, 117.0, 116.5, 15.6, 15.5, 15.3, 15.3, 15.2, 14.9, 14.4, 14.3.

**HRMS (ESI) m/z:** [M+H]<sup>+</sup> Calculated for C<sub>31</sub>H<sub>23</sub>N<sub>4</sub>O<sub>2</sub>S<sub>4</sub><sup>+</sup>: 611.0698; found: 611.0703.

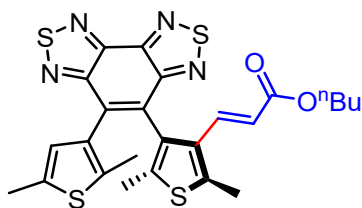

**butyl (E)-3-(4-(5-(2,5-dimethylthiophen-3-yl)benzo[1,2-c:3,4-c']bis([1,2,5]thiadiazole)-4-yl)-2,5-dimethylthiophen-3-yl)acrylate 3k:**

A purification by flash chromatography in petroleum ether : dichloromethane : ethyl acetate = 15 : 4 : 1 to give **3k** as red oil (33.5 mg, 62%). The ee value was determined by HPLC analysis on a Chiralcel IF-3 column (hexane/isopropanol = 95/5, flow = 1.0 mL/min, 254 nm) with  $t_r$  = 7.3 min (major), 8.4 min (minor): 94 : 6 er.  $[\alpha]_D^{20}$  = 90.8 (c = 1.0, CHCl<sub>3</sub>)

<sup>1</sup>H NMR (400 MHz, CDCl<sub>3</sub>)  $\delta$  7.26 (d,  $J$  = 16 Hz, 1 H), 7.19 (d,  $J$  = 16 Hz, 1 H), 6.36 (d,  $J$  = 16 Hz, 1 H), 6.32 (d,  $J$  = 16 Hz, 1 H), 5.67 (d,  $J$  = 16.1 Hz, 1 H), 5.63 (d,  $J$  = 16.1 Hz, 1 H), 3.94 - 4.06 (m, 4 H), 2.57 (s, 3 H), 2.53 (s, 3 H), 2.36 (s, 3 H), 2.32 (s, 3 H), 2.10 (s, 3 H), 2.08 (s, 3 H), 2.06 (s, 3 H), 2.04 (s, 3 H), 1.45 - 1.57 (m, 4 H), 1.20 - 1.33 (m, 4 H), 0.80 - 0.91 (t,  $J$  = 7.2 Hz, 6 H). ap/p=44/56.

<sup>13</sup>C NMR (101 MHz, CDCl<sub>3</sub>)  $\delta$  167.3, 167.2, 156.8, 156.8, 156.7, 147.6, 147.3, 147.3, 138.8, 138.8, 137.7, 137.5, 137.2, 136.7, 135.7, 135.6, 134.9, 134.4, 132.8, 132.7, 132.6, 132.3, 131.7, 131.4, 131.0, 130.5, 130.0, 130.0, 127.4, 126.5, 118.4, 117.9, 64.3, 64.2, 30.6, 19.1, 19.1, 15.5, 15.3, 15.2, 15.1, 15.0, 14.9, 14.3, 14.3, 14.2, 13.7.

HRMS (ESI)  $m/z$ : [M+H]<sup>+</sup> Calculated for C<sub>25</sub>H<sub>25</sub>N<sub>4</sub>O<sub>2</sub>S<sub>4</sub><sup>+</sup>: 541.0855; found: 541.0856.

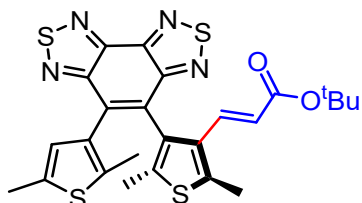

**tert-butyl (E)-3-(4-(5-(2,5-dimethylthiophen-3-yl)benzo[1,2-c:3,4-c']bis([1,2,5]thiadiazole)-4-yl)-2,5-dimethylthiophen-3-yl)acrylate 3l:**

A purification by flash chromatography in petroleum ether : dichloromethane : ethyl acetate = 15 : 4 : 1 to give **3l** as red oil (44.3 mg, 62%). The ee value was determined by HPLC analysis on a Chiralcel OD-H column (hexane/isopropanol = 90/10, flow = 1.0 mL/min, 254 nm) with  $t_r$  = 6.7 min (major) · 5.9 min (minor): 88 : 12 er.  $[\alpha]_D^{20}$  = 110.6 (c = 1.0, CHCl<sub>3</sub>)

<sup>1</sup>H NMR (400 MHz, CDCl<sub>3</sub>)  $\delta$  7.16 (d,  $J$  = 16 Hz, 1 H), 7.09 (d,  $J$  = 16 Hz, 1 H), 6.40 (s, 1 H), 6.29 (s, 1 H), 5.63 (d,  $J$  = 16.1 Hz, 1 H), 5.59 (d,  $J$  = 16.1 Hz, 1 H), 2.56 (s, 3 H), 2.51 (s, 3 H), 2.35 (s, 3 H), 2.33 (s, 3 H), 2.09 (s, 3 H), 2.08 (s, 3 H), 2.04 (s, 6 H), 1.37 (s, 18 H). ap/p=44/56.

<sup>13</sup>C NMR (101 MHz, CDCl<sub>3</sub>)  $\delta$  166.6, 166.5, 156.8, 156.8, 156.7, 147.6, 147.3, 147.3, 138.4, 138.2, 137.3, 136.8, 136.6,

136.6, 135.6, 135.5, 134.6, 134.1, 132.8, 132.8, 132.7, 132.5, 131.6, 131.5, 131.0, 130.5, 130.1, 130.1, 127.5, 126.5, 120.2, 119.7, 80.3, 80.3, 28.1, 28.1, 15.5, 15.4, 15.2, 15.2, 15.1, 14.8, 14.3, 14.3.

**HRMS (ESI) m/z:** [M+Na]<sup>+</sup> Calculated for C<sub>25</sub>H<sub>24</sub>N<sub>4</sub>O<sub>2</sub>S<sub>4</sub>Na<sup>+</sup>: 563.0674; found: 563.0673.

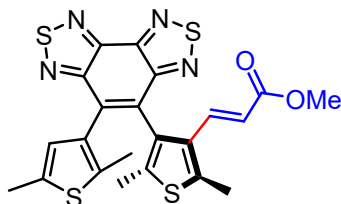

**methyl (E)-3-(4-(5-(2,5-dimethylthiophen-3-yl)benzo[1,2-c:3,4-c']bis([1,2,5]thiadiazole)-4-yl)-2,5-dimethylthiophen-3-yl)acrylate 3m:**

A purification by flash chromatography in petroleum ether : dichloromethane : ethyl acetate = 15 : 4 : 1 to give **3m** as red oil (37.9 mg, 76%). The ee value was determined by HPLC analysis on a Chiralcel IF-3 column (hexane/isopropanol = 95/5, flow = 0.8 mL/min, 254 nm) with *t<sub>r</sub>* = 6.2 min (major), 6.9 min (minor): 86.5 : 13.5 er. [α]<sub>D</sub><sup>20</sup> = 80.7 (c = 1.0, CHCl<sub>3</sub>)

**<sup>1</sup>H NMR (400 MHz, CDCl<sub>3</sub>)** δ 7.30 (d, *J* = 16 Hz, 1 H), 7.22 (d, *J* = 16 Hz, 1 H), 6.35 (s, 1 H), 6.32 (s, 1 H), 5.67 (d, *J* = 16.1 Hz, 1 H), 5.60 (d, *J* = 16.1 Hz, 1 H), 3.61 (s, 3 H), 3.60 (s, 3 H), 2.57 (s, 3 H), 2.53 (s, 3 H), 2.36 (s, 3 H), 2.31 (s, 3 H), 2.10 (s, 3 H), 2.08 (s, 3 H), 2.06 (s, 3 H), 2.04 (s, 3 H). ap/p=44/56.

**<sup>13</sup>C NMR (101 MHz, CDCl<sub>3</sub>)** δ 167.6, 167.5, 156.8, 156.8, 156.7, 147.6, 147.3, 147.3, 139.1, 139.0, 137.9, 137.7, 137.2, 136.7, 135.8, 135.7, 135.0, 134.5, 132.8, 132.7, 132.5, 132.2, 131.6, 131.4, 131.0, 130.5, 130.0, 130.0, 127.4, 126.5, 117.8, 117.2, 51.5, 15.4, 15.2, 15.1, 15.0, 14.9, 14.3, 14.2.

**HRMS (ESI) m/z:** [M+H]<sup>+</sup> Calculated for C<sub>22</sub>H<sub>19</sub>N<sub>4</sub>O<sub>2</sub>S<sub>4</sub><sup>+</sup>: 499.0385; found: 499.0384.

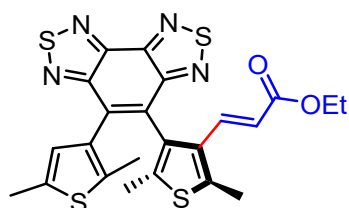

**ethyl (E)-3-(4-(5-(2,5-dimethylthiophen-3-yl)benzo[1,2-c:3,4-c']bis([1,2,5]thiadiazole)-4-yl)-2,5-dimethylthiophen-3-yl)acrylate 3n:**

A purification by flash chromatography in petroleum ether : dichloromethane : ethyl acetate = 15 : 4 : 1 to give **3n** as red oil (40.5 mg, 79%). The ee value was determined by HPLC analysis on a Chiralcel IF-3 column (hexane/isopropanol = 95/5, flow = 0.8 mL/min, 254 nm) with *t<sub>r</sub>* = 8.6 min (major), 10.0 min (minor): 92.5 : 7.5 er. [α]<sub>D</sub><sup>20</sup> = 159.9 (c = 1.0, CHCl<sub>3</sub>)

**<sup>1</sup>H NMR (400 MHz, CDCl<sub>3</sub>)** δ 7.28 (d, *J* = 16 Hz, 1 H), 7.20 (d, *J* = 16 Hz, 1 H), 6.37 (s, 1 H), 6.31 (s, 1 H), 5.67 (d, *J* = 16.1 Hz, 1 H), 5.61 (d, *J* = 16.1 Hz, 1 H), 4.00 - 4.15 (m, 4 H), 2.56 (s, 3 H), 2.53 (s, 3 H), 2.35 (s, 3 H), 2.32 (s, 3 H), 2.10 (s, 3 H), 2.08 (s, 3 H), 2.07 (s, 3 H), 2.04 (s, 3 H), 1.14 - 1.23 (m, 6 H). ap/p=44/56.

**<sup>13</sup>C NMR (101 MHz, CDCl<sub>3</sub>)** δ 167.2, 167.1, 156.8, 156.8, 156.8, 156.7, 147.6, 147.3, 147.3, 138.9, 138.8, 137.7, 137.5, 137.3, 136.7, 135.7, 135.6, 134.9, 134.4, 132.8, 132.7, 132.6, 132.3, 131.7, 131.5, 131.0, 130.5, 130.0, 130.0, 127.4, 126.5, 118.4, 117.8, 60.3, 60.3, 15.4, 15.3, 15.2, 15.1, 15.0, 14.8, 14.3, 14.3, 14.3.

**HRMS (ESI) m/z:** [M+H]<sup>+</sup> Calculated for C<sub>23</sub>H<sub>21</sub>N<sub>4</sub>O<sub>2</sub>S<sub>4</sub><sup>+</sup>: 513.0542; found: 513.0546.

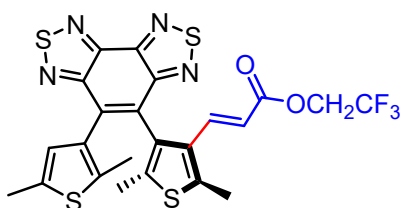

**2,2,2-trifluoroethyl (E)-3-(4-(5-(2,5-dimethylthiophen-3-yl)benzo[1,2-c:3,4-c']bis([1,2,5]thiadiazole)-4-yl)-2,5-dimethylthiophen-3-yl)acrylate 3o:**

A purification by flash chromatography in petroleum ether : dichloromethane : ethyl acetate = 15 : 4 : 1 to give **3o** as red oil (40.8 mg, 72%). The ee value was determined by HPLC analysis on a Chiralcel IF-3 column (hexane/isopropanol = 95/5, flow = 0.8 mL/min, 254 nm) with *t<sub>r</sub>* = 5.2 min (major), 6.0 min (minor): 89 : 11 er. [ $\alpha$ ]<sub>D</sub><sup>20</sup> = 133.5 (*c* = 1.0, CHCl<sub>3</sub>)

**<sup>1</sup>H NMR (400 MHz, CDCl<sub>3</sub>)** δ 7.34 (d, *J* = 16 Hz, 1 H), 7.29 (d, *J* = 16 Hz, 1 H), 6.38 (s, 1 H), 6.30 (s, 1 H), 5.74 (d, *J* = 16.1 Hz, 1 H), 5.69 (d, *J* = 16.1 Hz, 1 H), 4.33 - 4.47 (m, 4 H), 2.59 (s, 3 H), 2.56 (s, 3 H), 2.35 (s, 3 H), 2.32 (s, 3 H), 2.09 (s, 3 H), 2.07 (s, 3 H), 2.05 (s, 6 H). ap/p=45/55.

**<sup>13</sup>C NMR (101 MHz, CDCl<sub>3</sub>)** δ 165.4, 156.8, 156.7, 156.7, 156.6, 147.6, 147.3, 147.3, 140.3, 140.2, 140.2, 140.0, 137.3, 136.8, 135.9, 135.8, 135.3, 134.7, 132.9, 132.8, 132.7, 132.5, 131.1, 131.0, 130.8, 130.4, 129.7, 129.6, 127.4, 126.4, 124.3, 124.3, 121.6, 121.6, 115.6, 115.2, 60.7, 60.6, 60.4, 60.3, 60.2, 59.9, 59.9, 59.6, 59.5, 15.6, 15.5, 15.2, 15.0, 14.9, 14.8, 14.4, 14.3.

**<sup>19</sup>F NMR (376 MHz, CDCl<sub>3</sub>)** δ -73.6, -73.7 (both s, total 3 F)

**HRMS (ESI) m/z:** [M+H]<sup>+</sup> Calculated for C<sub>23</sub>H<sub>18</sub>F<sub>3</sub>N<sub>4</sub>O<sub>2</sub>S<sub>4</sub><sup>+</sup>: 567.0259; found: 567.0265.

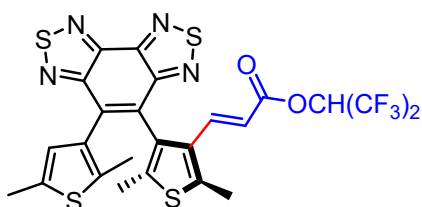

**1,1,1,3,3,3-hexafluoropropan-2-yl (E)-3-(4-(5-(2,5-dimethylthiophen-3-yl)benzo[1,2-c:3,4-c']bis([1,2,5]thiadiazole)-4-yl)-2,5-dimethylthiophen-3-yl)acrylate 3p:**

A purification by flash chromatography in petroleum ether : dichloromethane : ethyl acetate = 40 : 10 : 1 to give **3p** as red oil (44.4 mg, 70%). The ee value was determined by HPLC analysis on a Chiralcel A05 column (hexane/isopropanol = 90/10, flow = 1.0 mL/min, 254 nm) with *t<sub>r</sub>* = 5.2 min (major), 4.6 min (minor): 89 : 11 er.  $[\alpha]_{\text{D}}^{20} = 125.9$  (c = 1.0, CHCl<sub>3</sub>)

**<sup>1</sup>H NMR (400 MHz, CDCl<sub>3</sub>)** δ 7.40 (d, *J* = 16 Hz, 1 H), 7.37 (d, *J* = 16 Hz, 1 H), 6.40 (s, 1 H), 6.25 (s, 1 H), 5.66 - 5.82 (m, 4 H), 2.61 (s, 3 H), 2.58 (s, 3 H), 2.34 (s, 3 H), 2.31 (s, 3 H), 2.11 (s, 3 H), 2.10 (s, 3 H), 2.05 (s, 6 H). ap/p=45/55.

**<sup>13</sup>C NMR (101 MHz, CDCl<sub>3</sub>)** δ 163.8, 163.7, 156.8, 156.6, 156.6, 156.5, 147.6, 147.3, 147.3, 142.2, 142.0, 141.6, 141.5, 137.4, 136.9, 136.0, 135.5, 135.0, 133.0, 132.9, 132.8, 130.7, 130.4, 129.4, 129.3, 127.3, 126.3, 121.9, 119.0, 113.4, 113.2, 66.6, 66.3, 65.9, 15.8, 15.8, 15.2, 15.0, 14.9, 14.7, 14.5, 14.4.

**<sup>19</sup>F NMR (376 MHz, CDCl<sub>3</sub>)** δ -73.2 (m, 6 F).

**HRMS (ESI) *m/z*:** [M+H]<sup>+</sup> Calculated for C<sub>24</sub>H<sub>17</sub>F<sub>6</sub>N<sub>4</sub>O<sub>2</sub>S<sub>4</sub><sup>+</sup>: 635.0133; found: 635.0133.

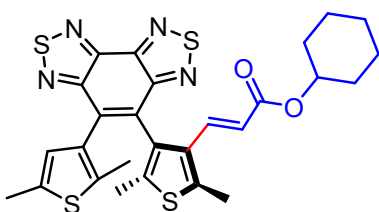

**cyclohexyl (E)-3-(4-(5-(2,5-dimethylthiophen-3-yl)benzo[1,2-c:3,4-c']bis([1,2,5]thiadiazole)-4-yl)-2,5-dimethylthiophen-3-yl)acrylate 3q:**

A purification by flash chromatography in petroleum ether : dichloromethane : ethyl acetate = 15 : 4 : 1 to give **3q** as red oil (48.7 mg, 86%). The ee value was determined by HPLC analysis on a Chiralcel IF-3 column (hexane/isopropanol = 95/5, flow = 1.0 mL/min, 254 nm) with *t<sub>r</sub>* = 5.3 min (major), 6.8 min (minor): 90.5 : 9.5 er.  $[\alpha]_{\text{D}}^{20} = 78.9$  (c = 1.0, CHCl<sub>3</sub>)

**<sup>1</sup>H NMR (400 MHz, CDCl<sub>3</sub>)** δ 7.23 (d, *J* = 16.1 Hz, 1 H), 7.16 (d, *J* = 16.1 Hz, 1 H), 6.34 (s, 1 H), 6.29 (s, 1 H), 5.67 (d, *J* = 14 Hz, 1 H), 5.63 (d, *J* = 14 Hz, 1 H), 4.62 - 4.73 (m, 2 H), 2.56 (s, 3 H), 2.52 (s, 3 H), 2.35 (s, 3 H), 2.32 (s, 3 H), 2.10 (s, 3 H), 2.09 (s, 3 H), 2.07 (s, 3 H), 2.05 (s, 3 H), 1.68 - 1.80 (m, 4 H), 1.44 - 1.63 (m, 6 H), 1.10 - 1.38 (m, 10 H). ap/p=45/55.



$^{13}\text{C}$  NMR (101 MHz,  $\text{CDCl}_3$ )  $\delta$  166.6, 166.5, 156.8, 156.8, 156.7, 147.6, 147.3, 138.5, 138.4, 137.4, 137.3, 136.6, 135.6, 135.5, 134.7, 134.3, 132.8, 132.7, 132.7, 132.4, 131.7, 131.5, 131.0, 130.5, 130.1, 130.0, 127.4, 126.5, 119.0, 118.5, 72.6, 72.5, 31.6, 31.6, 25.3, 23.7, 23.7, 15.4, 15.3, 15.1, 15.1, 14.8, 14.3, 14.2.

HRMS (ESI)  $m/z$ :  $[\text{M}+\text{H}]^+$  Calculated for  $\text{C}_{27}\text{H}_{27}\text{N}_4\text{O}_2\text{S}_4^+$ : 567.1011; found: 567.1015.

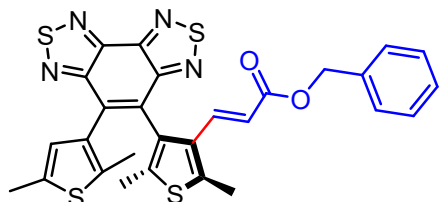

**benzyl (E)-3-(4-(5-(2,5-dimethylthiophen-3-yl)benzo[1,2-c:3,4-c']bis[1,2,5]thiadiazole)-4-yl)-2,5-dimethylthiophen-3-yl)acrylate 3r:**

A purification by flash chromatography in petroleum ether : dichloromethane : ethyl acetate = 15 : 4 : 1 to give **3r** as red oil (41.4 mg, 72%). The ee value was determined by HPLC analysis on a Chiralcel IF-3 column (hexane/isopropanol = 85/15, flow = 1.0 mL/min, 254 nm) with  $t_r$  = 7.0 min (major), 6.5 min (minor): 93.5 : 6.5 er.  $[\alpha]_{\text{D}}^{20}$  = 134.5 (c = 1.0,  $\text{CHCl}_3$ )

$^1\text{H}$  NMR (400 MHz,  $\text{CDCl}_3$ )  $\delta$  7.18 - 7.35 (m, 12 H), 6.33 (s, 1 H), 6.30 (s, 1 H), 5.74 (d,  $J$  = 16.1 Hz, 1 H), 5.69 (d,  $J$  = 16.1 Hz, 1 H), 5.00 - 5.10 (m, 4 H), 2.56 (s, 3 H), 2.52 (s, 3 H), 2.35 (s, 3 H), 2.26 (s, 3 H), 2.08 (s, 3 H), 2.07 (s, 3 H), 2.04 (s, 3 H), 1.98 (s, 3 H). ap/p=47/53.

$^{13}\text{C}$  NMR (101 MHz,  $\text{CDCl}_3$ )  $\delta$  167.0, 166.9, 156.8, 156.8, 156.7, 156.7, 147.6, 147.3, 147.3, 139.1, 139.0, 138.3, 138.2, 137.3, 136.7, 135.9, 135.9, 135.7, 135.6, 135.0, 134.4, 132.8, 132.8, 132.7, 132.4, 131.5, 131.4, 130.9, 130.5, 129.9, 129.8, 128.6, 128.5, 128.3, 128.3, 128.2, 128.2, 127.5, 126.5, 117.9, 117.4, 66.2, 66.1, 15.5, 15.4, 15.2, 15.1, 15.0, 14.8, 14.3, 14.3.

HRMS (ESI)  $m/z$ :  $[\text{M}+\text{H}]^+$  Calculated for  $\text{C}_{28}\text{H}_{23}\text{N}_4\text{O}_2\text{S}_4^+$ : 575.0698; found: 575.0701.

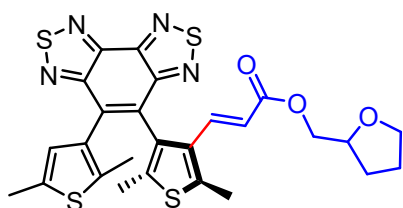

**(tetrahydrofuran-2-yl)methyl (E)-3-(4-(5-(2,5-dimethylthiophen-3-yl)benzo[1,2-c:3,4-c']bis[1,2,5]thiadiazole)-4-yl)-2,5-dimethylthiophen-3-yl)acrylate 3s:**

A purification by flash chromatography in petroleum ether : dichloromethane : ethyl acetate = 7 : 2 : 1 to give **3s** as red oil (37.0 mg, 65%). The ee value was determined by HPLC analysis on a Chiralcel IF-3 column (hexane/isopropanol = 90/10, flow = 1.0 mL/min, 254 nm) with  $t_r$  = 10.7 min (major), 12.7 min (minor): 89.5 : 10.5 dr.  $[\alpha]_{\text{D}}^{20}$  = 123.1 (c = 1.0,  $\text{CHCl}_3$ )

**<sup>1</sup>H NMR (400 MHz, CDCl<sub>3</sub>)** δ 7.18 - 7.32 (m, 2 H), 6.37 (s, 1 H), 6.32 (s, 1 H), 5.76 (dd, *J* = 16.1, 2.8 Hz, 1 H), 5.71 (dd, *J* = 16.1, 2.8 Hz, 1 H), 3.88 - 4.18 (m, 6 H), 3.66 - 3.82 (m, 4 H), 2.56 (s, 3 H), 2.53 (s, 3 H), 2.36 (s, 3 H), 2.32 (s, 3 H), 2.09 (s, 3 H), 2.07 (s, 3 H), 2.06 (s, 3 H), 2.04 (s, 3 H), 1.75 - 1.98 (m, 6 H), 1.40 - 1.55 (m, 2 H). ap/p=47/53.

**<sup>13</sup>C NMR (101 MHz, CDCl<sub>3</sub>)** δ 167.2, 167.2, 156.8, 156.8, 156.7, 147.6, 147.3, 139.1, 139.1, 139.0, 138.3, 138.2, 138.1, 138.1, 137.3, 137.3, 136.6, 135.7, 135.7, 135.6, 134.9, 134.3, 132.8, 132.8, 132.8, 132.7, 132.4, 132.4, 131.6, 131.6, 131.4, 131.3, 131.0, 131.0, 130.5, 130.5, 130.0, 129.9, 129.9, 127.5, 126.5, 126.5, 117.8, 117.8, 117.4, 117.3, 68.4, 68.4, 66.5, 66.5, 66.4, 27.9, 27.9, 25.6, 25.6, 15.6, 15.6, 15.4, 15.4, 15.2, 15.1, 15.0, 14.8, 14.3, 14.3.

**HRMS (ESI) m/z:** [M+H]<sup>+</sup> Calculated for C<sub>26</sub>H<sub>25</sub>N<sub>4</sub>O<sub>3</sub>S<sub>4</sub><sup>+</sup>: 569.0804; found: 569.0807.

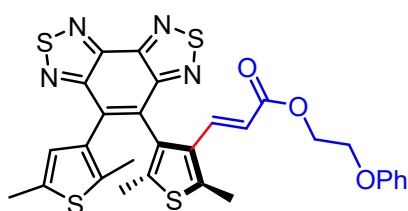

**2-phenoxvethyl (*E*)-3-(4-(5-(2,5-dimethylthiophen-3-yl)benzo[1,2-*c*:3,4-*c'*]bis([1,2,5]thiadiazole)-4-yl)-2,5-dimethylthiophen-3-yl)acrylate 3t:**

A purification by flash chromatography in petroleum ether : dichloromethane : ethyl acetate = 7 : 2 : 1 to give **3t** as red oil (33.2 mg, 55%,). The ee value was determined by HPLC analysis on a Chiralcel AD-H column (hexane/isopropanol = 92/8, flow = 0.8 mL/min, 254 nm) with *t<sub>r</sub>* = 16.0 min (major), 14.5 min (minor): 88 : 12 er. [ $\alpha$ ]<sub>D</sub><sup>20</sup> = 118.4 (c = 1.0, CHCl<sub>3</sub>)

**<sup>1</sup>H NMR (400 MHz, CDCl<sub>3</sub>)** δ 7.20 - 7.31 (m, 6 H), 6.92 - 6.98 (m, 2 H), 6.86 - 6.78 (m, 4 H), 6.42 (d, *J* = 16.3 Hz, 1 H), 6.28 (d, *J* = 16.3 Hz, 1 H), 5.65 - 5.77 (m, 2 H), 4.32 - 4.46 (m, 4 H), 4.06 - 4.16 (m, 4 H), 2.56 (s, 3 H), 2.52 (s, 3 H), 2.34 (s, 3 H), 2.30 (s, 3 H), 2.08 (s, 3 H), 2.06 (s, 3 H), 2.05 (s, 3 H), 2.04 (s, 3 H). ap/p=47/53.

**<sup>13</sup>C NMR (101 MHz, CDCl<sub>3</sub>)** δ 167.1, 167.0, 158.3, 156.8, 156.8, 156.7, 156.7, 147.6, 147.6, 147.3, 147.3, 139.2, 139.1, 138.5, 138.3, 137.3, 136.7, 135.8, 135.6, 135.0, 134.5, 132.8, 132.8, 132.7, 132.5, 131.5, 131.4, 130.9, 130.5, 129.9, 129.8, 129.6, 127.6, 126.5, 121.2, 121.2, 117.7, 117.2, 114.5, 114.5, 65.7, 62.8, 62.7, 15.5, 15.4, 15.2, 15.1, 15.1, 14.8, 14.4, 14.3.

**HRMS (ESI) m/z:** [M+H]<sup>+</sup> Calculated for C<sub>29</sub>H<sub>25</sub>N<sub>4</sub>O<sub>3</sub>S<sub>4</sub><sup>+</sup>: 605.0804; found: 605.0805.

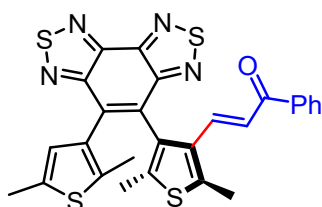

**(E)-3-(4-(5-(2,5-dimethylthiophen-3-yl)benzo[1,2-c:3,4-c']bis([1,2,5]thiadiazole)-4-yl)-2,5-dimethylthiophen-3-yl)-1-phenylprop-2-en-1-one 3u:**

A purification by flash chromatography in petroleum ether : dichloromethane : ethyl acetate = 15 : 4 : 1 to give **3u** as red oil (26.1 mg, 48%). The ee value was determined by HPLC analysis on a Chiralcel AD-H column (hexane/isopropanol = 90/10, flow = 1.0 mL/min, 254 nm) with  $t_r$  = 12.7 min (major), 9.0 min (minor): 87 : 13 er.  $[\alpha]_D^{20}$  = 146.0 (c = 1.0, CHCl<sub>3</sub>)

**<sup>1</sup>H NMR (400 MHz, CDCl<sub>3</sub>)**  $\delta$  7.25 - 7.62 (m, 12 H), 6.80 (d,  $J$  = 16.3 Hz, 1 H), 6.72 (d,  $J$  = 16.3 Hz, 1 H), 6.36 (s, 1 H), 6.34 (s, 1 H), 2.66 (s, 3 H), 2.62 (s, 3 H), 2.37 (s, 3 H), 2.18 (s, 3 H), 2.13 (s, 3 H), 2.12 (s, 3 H), 2.08 (s, 3 H), 1.99 (s, 3 H). ap/p=42/58.

**<sup>13</sup>C NMR (101 MHz, CDCl<sub>3</sub>)**  $\delta$  190.1, 190.0, 156.9, 156.8, 156.8, 147.6, 147.6, 147.3, 147.3, 140.2, 139.6, 138.1, 138.0, 137.7, 137.5, 137.4, 136.6, 135.8, 135.7, 135.1, 134.6, 133.0, 133.0, 132.8, 132.7, 132.7, 132.5, 132.4, 132.3, 131.0, 130.5, 130.2, 130.1, 128.6, 128.5, 128.0, 127.9, 127.2, 126.6, 122.4, 121.4, 15.7, 15.4, 15.2, 15.1, 15.1, 14.9, 14.4, 14.2.

**HRMS (ESI)**  $m/z$ : [M+H]<sup>+</sup> Calculated for C<sub>27</sub>H<sub>21</sub>N<sub>4</sub>OS<sub>4</sub><sup>+</sup>: 545.0593; found: 545.0597.

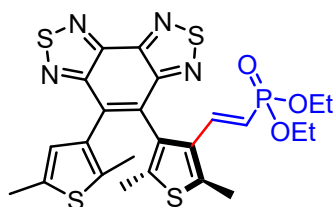

**diethyl (E)-(2-(4-(5-(2,5-dimethylthiophen-3-yl)benzo[1,2-c:3,4-c']bis([1,2,5]thiadiazole)-4-yl)-2,5-dimethylthiophen-3-yl)vinyl)phosphonate 3v:**

A purification by flash chromatography in petroleum ether : dichloromethane : ethyl acetate = 4 : 3 : 3 to give **3v** as red oil (42.6 mg, 74%). The ee value was determined by HPLC analysis on a Chiralcel IF-3 column (hexane/isopropanol = 85/15, flow = 1.0 mL/min, 254 nm) with  $t_r$  = 7.0 min (minor), 6.5 min (major): 93.5 : 6.5 er.  $[\alpha]_D^{20}$  = 84.7 (c = 1.0, CHCl<sub>3</sub>)

**<sup>1</sup>H NMR (400 MHz, CDCl<sub>3</sub>)**  $\delta$  7.19 (dd,  $J$  = 24.1, 17.7 Hz, 1 H), 7.07 (dd,  $J$  = 24.1, 17.7 Hz, 1 H), 6.45 (s, 1 H), 6.32 (s, 1 H), 5.27 - 5.50 (m, 2 H), 3.70 - 3.95 (m, 8 H), 2.56 (s, 3 H), 2.55 (s, 3 H), 2.39 (s, 3 H), 2.33 (s, 3 H), 2.19 (s, 3 H), 2.09 (s, 3 H), 2.02 (s, 3 H), 1.98 (s, 3 H), 1.08 - 1.21 (m, 12 H). ap/p=45/55.

**<sup>13</sup>C NMR (101 MHz, CDCl<sub>3</sub>)**  $\delta$  156.9, 156.9, 156.8, 156.6, 147.6, 147.5, 147.3, 147.3, 141.6, 141.6, 141.4, 141.4, 139.0, 138.7, 137.1, 136.6, 135.9, 135.7, 134.9, 134.4, 132.8, 132.8, 132.5, 132.2, 132.1, 132.0, 131.8, 131.6, 131.0, 130.4,

130.1, 130.0, 127.0, 126.9, 115.2, 114.5, 113.3, 112.7, 61.5, 61.5, 61.5, 61.4, 16.3, 16.2, 15.3, 15.3, 15.2, 15.1, 15.0, 14.9, 14.3, 13.9.

$^{31}\text{P}$  NMR (162 MHz,  $\text{CDCl}_3$ )  $\delta$  19.5.

HRMS (ESI)  $m/z$ :  $[\text{M}+\text{H}]^+$  Calculated for  $\text{C}_{24}\text{H}_{26}\text{N}_4\text{O}_3\text{S}_4\text{P}^+$ : 577.0620; found: 577.0620.

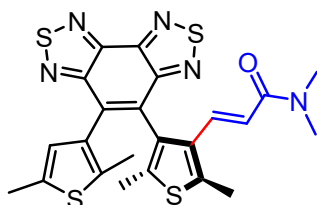

**(E)-3-(4-(5-(2,5-dimethylthiophen-3-yl)benzo[1,2-c:3,4-c']bis([1,2,5]thiadiazole)-4-yl)-2,5-dimethylthiophen-3-yl)-N,N-dimethylacrylamide 3w:**

A purification by flash chromatography in petroleum ether : dichloromethane : ethyl acetate = 5 : 2 : 3 to give **3w** as red oil (43.5 mg, 85%). The ee value was determined by HPLC analysis on a Chiralcel IF-3 column (hexane/isopropanol = 85/15, flow = 1.0 mL/min, 254 nm) with  $t_r$  = 14.6 min (major), 16.6 min (minor): 90 : 10 er.  $[\alpha]_D^{20}$  = 98.6 ( $c$  = 1.0,  $\text{CHCl}_3$ )

$^1\text{H}$  NMR (400 MHz,  $\text{CDCl}_3$ )  $\delta$  7.33 (d,  $J$  = 15.6 Hz, 1 H), 7.17 (d,  $J$  = 15.6 Hz, 1 H), 6.37 (s, 1 H), 6.33 (s, 1 H), 6.11 (d,  $J$  = 16 Hz, 1 H), 6.00 (d,  $J$  = 16 Hz, 1 H), 2.88 (s, 3 H), 2.85 (s, 3 H), 2.75 (s, 3 H), 2.56 (s, 3 H), 2.52 (s, 3 H), 2.49 (s, 3 H), 2.37 (s, 3 H), 2.30 (s, 3 H), 2.18 (s, 3 H), 2.08 (s, 3 H), 2.06 (s, 3 H), 2.00 (s, 3 H). ap/p=40/60.

$^{13}\text{C}$  NMR (101 MHz,  $\text{CDCl}_3$ )  $\delta$  166.7, 166.5, 157.0, 156.9, 156.8, 156.6, 147.5, 147.4, 147.2, 137.9, 137.2, 136.8, 136.4, 135.7, 135.6, 135.5, 135.2, 134.5, 134.1, 132.8, 132.7, 132.6, 132.6, 132.6, 131.9, 131.1, 130.7, 130.6, 130.4, 127.1, 126.7, 118.4, 117.0, 37.0, 36.6, 35.8, 35.7, 15.3, 15.2, 15.1, 15.0, 14.9, 14.3, 13.9.

HRMS (ESI)  $m/z$ :  $[\text{M}+\text{H}]^+$  Calculated for  $\text{C}_{23}\text{H}_{22}\text{N}_5\text{OS}_4^+$ : 512.0702; found: 512.0700.

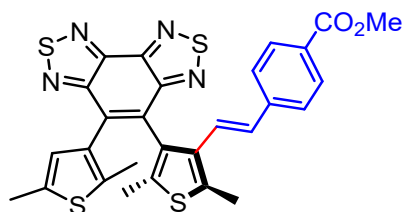

**methyl (E)-4-(2-(4-(5-(2,5-dimethylthiophen-3-yl)benzo[1,2-c:3,4-c']bis([1,2,5]thiadiazole)-4-yl)-2,5-dimethylthiophen-3-yl)vinyl)benzoate 3x:**

A purification by flash chromatography in petroleum ether : dichloromethane : ethyl acetate = 7 : 2 : 1 to give **3x** as red oil (37.0 mg, 65%). The ee value was determined by HPLC analysis on a Chiralcel IF-3 column (hexane/isopropanol =

97/3, flow = 1.0 mL/min, 254 nm) with  $t_r$  = 9.4 min (major), 10.6 min (minor): 92.5 : 7.5 er.  $[\alpha]_D^{20}$  = 115.8 (c = 1.0, CHCl<sub>3</sub>)

**<sup>1</sup>H NMR (400 MHz, CDCl<sub>3</sub>)** 7.80 - 7.89 (m, 4 H), 7.06 - 7.17 (m, 4 H), 6.65 (d,  $J$  = 16 Hz, 1 H), 6.62 (d,  $J$  = 16 Hz, 1 H), 6.25 - 6.37 (m, 4 H), 3.87 (s, 3 H), 3.86 (s, 3 H), 2.56 (s, 3 H), 2.54 (s, 3 H), 2.37 (s, 3 H), 2.18 (s, 3 H), 2.09 (s, 3 H), 2.08 (s, 3 H), 2.07 (s, 3 H), 1.84 (s, 3 H). ap/p=45/55.

**<sup>13</sup>C NMR (101 MHz, CDCl<sub>3</sub>)** 166.8, 157.0, 156.8, 147.5, 147.2, 142.0, 137.1, 136.7, 135.4, 134.7, 134.0, 133.8, 132.6, 132.3, 132.1, 132.0, 131.1, 130.7, 130.6, 130.6, 129.9, 129.8, 129.6, 129.1, 128.6, 128.5, 126.7, 125.8, 125.1, 52.1, 15.2, 15.1, 14.8, 14.5, 14.4.

**HRMS (ESI) m/z:** [M+H]<sup>+</sup> Calculated for C<sub>28</sub>H<sub>23</sub>N<sub>4</sub>O<sub>2</sub>S<sub>4</sub><sup>+</sup>: 575.0698; found: 575.0700.

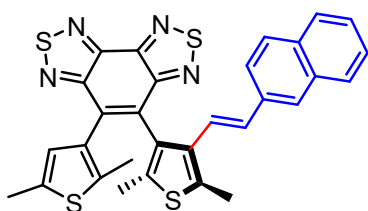

**(E)-4-(2,5-dimethyl-4-(2-(naphthalen-2-yl)vinyl)thiophen-3-yl)-5-(2,5-dimethylthiophen-3-yl)benzo[1,2-c:3,4-c']bis(1,2,5-thiadiazole) 3y:**

A purification by flash chromatography in petroleum ether : dichloromethane : ethyl acetate = 90 : 10 : 1 to give **3y** as red oil (36.8 mg, 65%). The ee value was determined by HPLC analysis on a Chiralcel IF-3 column (hexane/isopropanol = 92/8, flow = 0.8 mL/min, 254 nm) with  $t_r$  = 4.9 min (major), 5.5 min (minor): 87.5 : 12.5 er.  $[\alpha]_D^{20}$  = 134.8 (c = 1.0, CHCl<sub>3</sub>)

**<sup>1</sup>H NMR (400 MHz, CDCl<sub>3</sub>)**  $\delta$  7.56 - 7.76 (m, 6 H), 7.34 - 7.48 (m, 6 H), 7.27 - 7.30 (m, 2 H), 6.60 - 6.70 (m, 2 H), 6.34 - 6.47 (m, 4 H), 2.58 (s, 3 H), 2.56 (s, 3 H), 2.39 (s, 3 H), 2.19 (s, 3 H), 2.10 (s, 6 H), 2.08 (s, 3 H), 1.87 (s, 3 H). ap/p=45/55.

**<sup>13</sup>C NMR (101 MHz, CDCl<sub>3</sub>)**  $\delta$  157.2, 157.1, 157.0, 147.5, 147.3, 147.3, 137.1, 136.5, 135.4, 135.4, 135.0, 134.9, 134.4, 133.8, 133.5, 133.0, 132.8, 132.5, 132.3, 132.1, 132.0, 131.3, 131.0, 130.8, 130.5, 128.1, 127.8, 127.7, 127.6, 126.7, 126.3, 126.3, 126.0, 125.8, 123.0, 122.9, 15.3, 15.2, 15.1, 15.0, 14.8, 14.5, 14.5, 14.2.

**HRMS (ESI) m/z:** [M+H]<sup>+</sup> Calculated for C<sub>30</sub>H<sub>23</sub>N<sub>4</sub>S<sub>4</sub><sup>+</sup>: 567.0800; found: 567.0805.

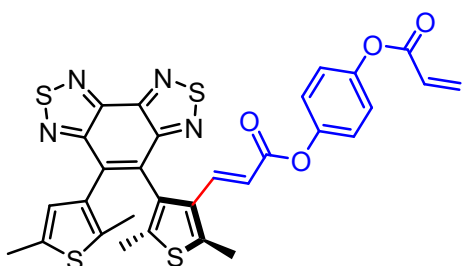

**4-(acryloyloxy)phenyl (E)-3-(4-(5-(2,5-dimethylthiophen-3-yl)benzo[1,2-c:3,4-c']bis([1,2,5]thiadiazole)-4-yl)-2,5-dimethylthiophen-3-yl)acrylate 3z-mono:**

A purification by flash chromatography in petroleum ether : dichloromethane : ethyl acetate = 7 : 2 : 1 to give **3z-mono** as red oil (47.3 mg, 75%,). The ee value was determined by HPLC analysis on a Chiralcel IF-3 column (hexane/isopropanol = 95/5, flow = 1.0 mL/min, 254 nm) with  $t_r$  = 20.5 min (major), 32.4 min (minor): 95.5 : 4.5 er.  $[\alpha]_D^{20}$  = 162.8 (c = 1.0, CHCl<sub>3</sub>)

**<sup>1</sup>H NMR (400 MHz, CDCl<sub>3</sub>)**  $\delta$  7.45 (d,  $J$  = 16.2 Hz, 1 H), 7.37 (d,  $J$  = 16.2 Hz, 1 H), 6.96 - 7.14 (m, 8 H), 6.54 - 6.63 (m, 2 H), 6.24 - 6.46 (m, 4 H), 5.97 - 6.01 (m, 2 H), 5.87 (d,  $J$  = 16.2 Hz, 1 H), 5.81 (d,  $J$  = 16.2 Hz, 1 H), 2.63 (s, 3 H), 2.59 (s, 3 H), 2.36 (s, 6 H), 2.13 (s, 3 H), 2.11 (s, 3 H), 2.10 (s, 3 H), 2.07 (s, 3 H). ap/p=45/55.

**<sup>13</sup>C NMR (101 MHz, CDCl<sub>3</sub>)**  $\delta$  165.5, 165.4, 164.4, 156.8, 156.7, 156.6, 148.1, 148.0, 147.8, 147.6, 147.3, 140.2, 140.0, 139.8, 139.6, 137.3, 136.8, 135.9, 135.8, 135.2, 134.7, 132.9, 132.8, 132.7, 132.5, 131.4, 131.2, 130.9, 130.5, 129.8, 129.7, 127.7, 127.4, 126.5, 122.4, 122.3, 116.8, 116.3, 15.6, 15.5, 15.3, 15.2, 14.8, 14.4, 14.3.

**HRMS (ESI) m/z:** [M+H]<sup>+</sup> Calculated for C<sub>30</sub>H<sub>23</sub>N<sub>4</sub>O<sub>4</sub>S<sub>4</sub><sup>+</sup>: 631.0597; found: 631.0595.

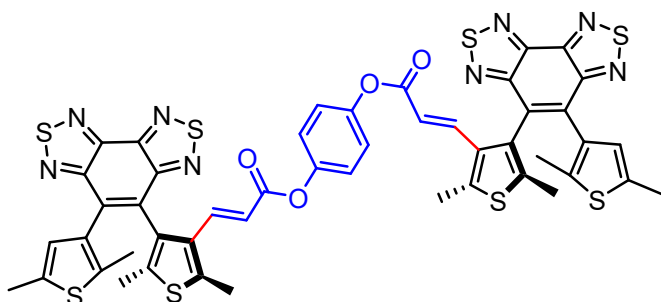

**4-(acryloyloxy)phenyl (E)-3-(4-(5-(2,5-dimethylthiophen-3-yl)benzo[1,2-c:3,4-c']bis([1,2,5]thiadiazole)-4-yl)-2,5-dimethylthiophen-3-yl)acrylate 3z-di:**

A purification by flash chromatography in petroleum ether : dichloromethane : ethyl acetate = 7 : 2 : 1 to give **3z-di** as red oil (57.4 mg, 55%,). The ee value was determined by HPLC analysis on a Chiralcel IF-3 column (hexane/isopropanol = 85/15, flow = 1.0 mL/min, 254 nm) with  $t_r$  = 28.4 min, 40.3 min, 56.1 min: 92 : 7.9 : 0.1.  $[\alpha]_D^{20}$  = 130.1 (c = 1.0, CHCl<sub>3</sub>)

**<sup>1</sup>H NMR (400 MHz, CDCl<sub>3</sub>)**  $\delta$  7.44 (dd,  $J$  = 16.1, 2.4 Hz, 2 H), 7.34 (dd,  $J$  = 16.1, 2.4 Hz, 2 H), 6.88 - 6.97 (m, 8 H), 6.40 (s, 2 H), 6.28 (s, 2 H), 5.83 (dd,  $J$  = 16.1, 1.6 Hz, 2 H), 5.77 (dd,  $J$  = 16.1, 1.6 Hz, 2 H), 2.60 (s, 6 H), 2.57 (s, 6 H), 2.35 (s, 6 H), 2.33 (s, 6 H), 2.11 (s, 6 H), 2.10 (s, 6 H), 2.09 (s, 6 H), 2.06 (s, 6 H). ap/p=45/55 (calculated based on single DAE unit).

**<sup>13</sup>C NMR (101 MHz, CDCl<sub>3</sub>)**  $\delta$  165.5, 165.4, 156.7, 156.6, 147.9, 147.8, 147.8, 147.6, 147.3, 147.3, 140.1, 140.0, 139.7, 139.5, 137.3, 136.8, 135.9, 135.7, 135.2, 134.7, 132.9, 132.8, 132.7, 132.4, 131.3, 131.2, 130.9, 130.5, 129.8, 129.7, 127.4, 126.4, 122.2, 122.2, 116.8, 116.2, 15.6, 15.5, 15.3, 15.2, 14.8, 14.4, 14.3.

**HRMS (ESI) m/z:** [M+Na]<sup>+</sup> Calculated for C<sub>48</sub>H<sub>34</sub>N<sub>8</sub>O<sub>4</sub>S<sub>8</sub>Na<sup>+</sup>: 1065.0361; found: 1065.0360.

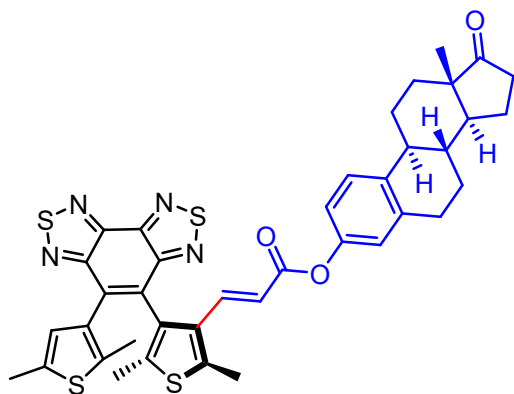

**(8R,9S,13S,14S)-13-methyl-17-oxo-7,8,9,11,12,13,14,15,16,17-decahydro-6H-cyclopenta[a]phenanthren-3-yl (E)-3-(4-(5-(2,5-dimethylthiophen-3-yl)benzo[1,2-c:3,4-c']bis([1,2,5]thiadiazole)-4-yl)-2,5-dimethylthiophen-3-yl)acrylate 3aa:**

A purification by flash chromatography in petroleum ether : dichloromethane : ethyl acetate = 7 : 2 : 1 to give **3aa** as red oil (49.4 mg, 67%). The ee value was determined by HPLC analysis on a Chiralcel IF-3 column (hexane/isopropanol = 90/10, flow = 1.0 mL/min, 254 nm) with *t<sub>r</sub>* = 35.9 min (major), 45.7 min (minor): 94 : 6 er. [ $\alpha$ ]<sub>D</sub><sup>20</sup> = 175.9 (c = 1.0, CHCl<sub>3</sub>)

**<sup>1</sup>H NMR (400 MHz, CDCl<sub>3</sub>)**  $\delta$  7.44 (d, *J* = 16.1 Hz, 1 H), 7.35 (d, *J* = 16.1 Hz, 1 H), 7.19 - 7.25 (m, 2 H), 6.67 - 6.81 (m, 4 H), 6.40 (s, 1 H), 6.30 (s, 1 H), 5.87 (d, *J* = 16.1 Hz, 1 H), 5.81 (d, *J* = 16.1 Hz, 1 H), 2.80 - 2.93 (m, 4 H), 2.62 (s, 3 H), 2.58 (s, 3 H), 2.52 (d, *J* = 8.8 Hz, 1 H), 2.47 (d, *J* = 8.8 Hz, 1 H), 2.33 - 2.41 (m, 8 H), 2.20 - 2.30 (m, 2 H), 1.90 - 2.20 (m, 20 H), 1.36 - 1.68 (m, 12 H), 0.85 - 0.93 (m, 6 H). ap/p=44/56.

**<sup>13</sup>C NMR (101 MHz, CDCl<sub>3</sub>)**  $\delta$  165.9, 165.8, 156.8, 156.7, 156.6, 148.5, 148.4, 147.6, 147.3, 147.3, 140.0, 139.8, 139.4, 139.2, 138.0, 137.3, 137.3, 136.8, 135.9, 135.7, 135.2, 134.6, 132.9, 132.8, 132.7, 132.4, 131.4, 131.2, 130.9, 130.5, 129.9, 129.8, 127.4, 126.5, 126.4, 121.5, 118.6, 117.2, 116.6, 50.4, 48.0, 44.1, 38.0, 35.9, 31.5, 29.4, 26.3, 25.7, 21.6, 15.6, 15.5, 15.3, 15.2, 14.9, 14.4, 14.3, 13.8.

**HRMS (ESI) m/z:** [M+H]<sup>+</sup> Calculated for C<sub>39</sub>H<sub>37</sub>N<sub>4</sub>O<sub>3</sub>S<sub>4</sub><sup>+</sup>: 737.1743; found: 737.1745.

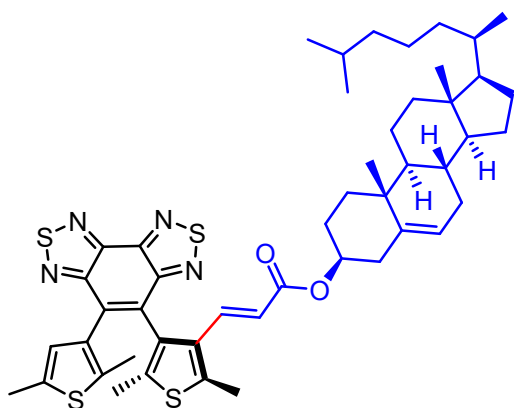

**(3S,8S,9S,10R,13R,14S,17R)-10,13-dimethyl-17-((R)-6-methylheptan-2-yl)-2,3,4,7,8,9,10,11,12,13,14,15,16,17-tetradecahydro-1H-cyclopenta[a]phenanthren-3-yl (E)-3-(4-(5-(2,5-dimethylthiophen-3-yl)benzo[1,2-c:3,4-c']bis([1,2,5]thiadiazole)-4-yl)-2,5-dimethylthiophen-3-yl)acrylate 3ab:**

A purification by flash chromatography in petroleum ether : dichloromethane : ethyl acetate = 7 : 2 : 1 to give **3ab** as red oil (55.5 mg, 65%). The ee value was determined by HPLC analysis on a Chiralcel IF-3 column (hexane/isopropanol = 97/3, flow = 1.0 mL/min, 254 nm) with  $t_r$  = 6.8 min (major), 10.4 min (minor): 93 : 7 er.  $[\alpha]_D^{20}$  = 99.2 (c = 1.0, CHCl<sub>3</sub>)

**<sup>1</sup>H NMR (400 MHz, CDCl<sub>3</sub>)**  $\delta$  7.13 - 7.28 (m, 2 H), 6.38 (s, 1 H), 6.28 (s, 1 H), 5.57 - 5.68 (m, 2 H), 5.28 - 5.35 (m, 2 H), 4.45 - 4.60 (m, 2 H), 2.56 (s, 3 H), 2.51 (s, 3 H), 2.34 (s, 3 H), 2.32 (s, 3 H), 2.17 - 2.27 (m, 4 H), 2.02 - 2.13 (m, 12 H), 1.89 - 2.02 (m, 4 H), 1.70 - 1.89 (m, 6 H), 0.80 - 1.60 (m, 66 H), 0.66 (s, 6 H). ap/p=44/56.

**<sup>13</sup>C NMR (101 MHz, CDCl<sub>3</sub>)**  $\delta$  166.7, 166.6, 156.9, 156.8, 156.7, 147.7, 147.3, 139.7, 138.8, 138.6, 137.6, 137.4, 137.3, 136.7, 135.7, 135.6, 134.8, 134.4, 132.8, 132.8, 132.7, 132.4, 131.8, 131.6, 131.0, 130.5, 130.1, 130.1, 127.5, 126.5, 122.7, 118.8, 118.3, 74.1, 74.0, 56.7, 56.2, 50.0, 42.3, 39.8, 39.6, 38.2, 37.0, 36.6, 36.2, 35.8, 31.9, 31.9, 29.8, 29.4, 28.3, 28.1, 27.8, 24.3, 23.9, 22.9, 22.6, 21.1, 19.4, 18.8, 15.4, 15.2, 15.1, 14.9, 14.4, 14.6, 11.9.

**HRMS (ESI)** m/z: [M+H]<sup>+</sup> Calculated for C<sub>48</sub>H<sub>61</sub>N<sub>4</sub>O<sub>2</sub>S<sub>4</sub><sup>+</sup>: 853.3672; found: 853.3673.



## 2.3 Synthetic Application

### 2.3.1 Scale-up of C-H Olefination for **3a**

To an oven-dried 100 mL Schlenk tube containing a stirring bar was added **1** (829.2 mg, 2 mmol), **2a** (444.5 mg, 3 mmol), Pd(OAc)<sub>2</sub> (44.8 mg, 0.2 mmol), **L2** (287.6 mg, 0.4 mmol), AgOAc (667.6 mg, 4 mmol), and CHCl<sub>3</sub>/*o*-DCB/<sup>n</sup>Bu<sub>2</sub>O (13.3 mL/13.3 mL/13.3 mL). The reaction flask was degassed three times with Ar. The reaction mixture was then stirred at 55 °C (aluminum heat transfer block) for 60 h in the dark. After cooling to room temperature, the mixture was diluted with dichloromethane, filtrated through celite. After concentration, the resulting residue was purified by silica gel column chromatography in petroleum ether: dichloromethane: ethyl acetate = 15: 4: 1 to afford the product **3a** as red foam (829.9 mg, 74% yield, 95.5:4.5 er). The er value was determined by chiral HPLC.

### 2.3.2 Derivatizations of **3a**

#### a) Synthesis of **5**

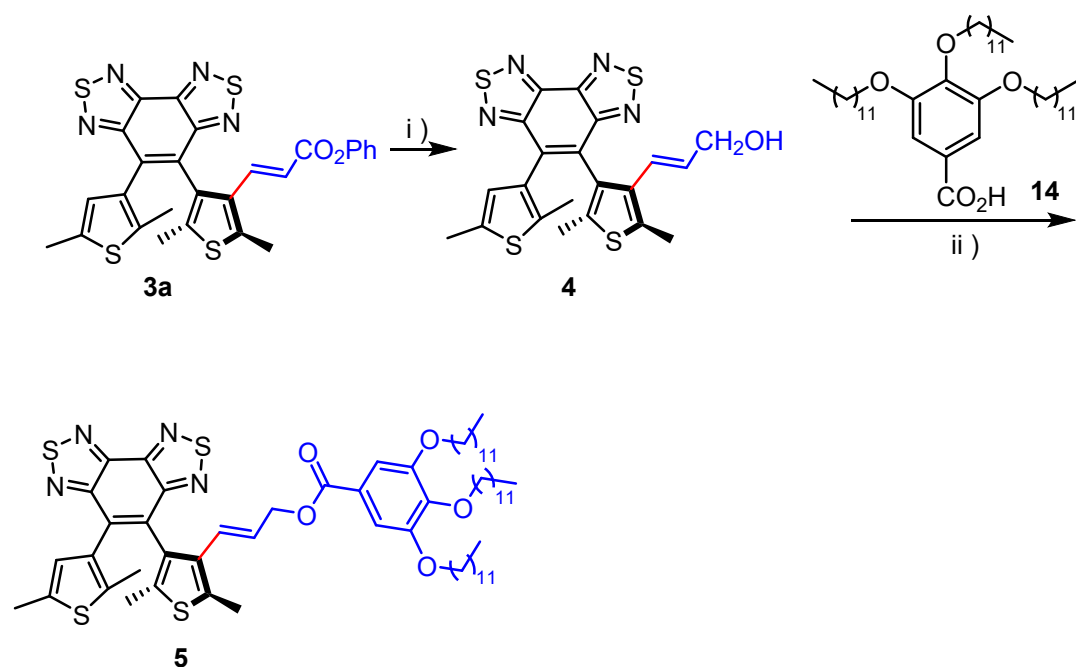

#### i. Synthesis of **4**

To an oven-dried 10 mL tube was added **3a** (112.1mg, 0.2 mmol), dry THF (4.0 mL). The tube was charged with Ar for more than three times and cooled to  $-78^\circ\text{C}$ . Then DIBAL-H (5.0 equiv) was added slowly at this temperature. After completed, the reaction mixture was allowed to stir at  $-78^\circ\text{C}$  overnight. Then the reaction was quenched by saturated  $\text{NH}_4\text{Cl}$  solution, extracted by EtOAc. The combined organic layers were washed with brine, dried over  $\text{Na}_2\text{SO}_4$ , and concentrated in vacuo. The crude product was purified by preparative TLC using petroleum ether: dichloromethane: ethyl acetate = 3: 1: 1 to afford the product **4** as a red foam (81.9 mg, 87% yield, 97:3 er). The er value was determined by chiral HPLC.

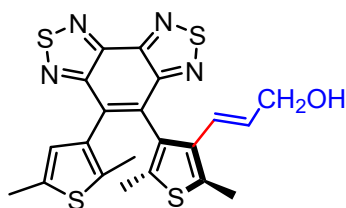

**(E)-3-(4-(5-(2,5-dimethylthiophen-3-yl)benzo[1,2-c:3,4-c']bis([1,2,5]thiadiazole)-4-yl)-2,5-dimethylthiophen-3-yl)allyl 3,4,5-tris(dodecyloxy)benzoate 4:**

The er value was determined by HPLC analysis on a Chiralcel AS-H column (hexane/isopropanol = 95/5, flow = 0.8 mL/min, 254 nm) with  $t_r$  = 25.5 min (minor), 28.8 min (major): 97 : 3 er.  $[\alpha]_D^{20}$  = 95.6 (c = 1.0, CHCl<sub>3</sub>)

<sup>1</sup>H NMR (400 MHz, DMSO-d<sub>6</sub>)  $\delta$  6.46 (s, 1 H), 6.33 (s, 1 H), 6.13 (s, 1 H), 6.03 (s, 1 H), 5.43 - 5.53 (m, 2 H), 4.42 - 4.53 (m, 2 H), 3.71 - 3.78 (m, 4 H), 2.41 (s, 3 H), 2.37 (s, 3 H), 2.32 (s, 3 H), 2.27 (s, 3 H), 2.12 (s, 3 H), 2.01 (s, 3 H), 2.00 (s, 3 H), 1.92 (s, 3 H). ap/p=46/54.

<sup>13</sup>C NMR (101 MHz, DMSO-d<sub>6</sub>)  $\delta$  157.3, 157.2, 157.2, 156.9, 147.8, 147.8, 147.6, 147.5, 136.1, 136.1, 134.6, 134.5, 134.4, 134.2, 133.2, 132.9, 132.7, 132.6, 132.5, 132.2, 132.1, 132.0, 131.7, 131.3, 131.2, 131.1, 127.8, 127.7, 122.7, 122.5, 62.1, 15.3, 15.0, 14.8, 14.6, 14.3, 13.9.

HRMS (ESI) m/z: [M+Na]<sup>+</sup> Calculated for C<sub>21</sub>H<sub>18</sub>N<sub>4</sub>OS<sub>4</sub>Na<sup>+</sup>: 493.0256; found: 493.0255.

ii. Synthesis of **5**

To a solution of **4** (81.9 mg, 0.17 mmol) in dry CH<sub>2</sub>Cl<sub>2</sub> (2 mL) at room temperature were sequentially added and **14** (236.3 mg, 0.35 mmol, 2.0 equiv), DMAP (11.0 mg, 0.09 mmol, 0.5 equiv), DCC (72.2 mg, 0.35 mmol, 2.0 equiv) under argon atmosphere. The reaction mixture was stirred at that temperature. The progress of the reaction was monitored by TLC. The reaction was quenched by adding water and extracted with CH<sub>2</sub>Cl<sub>2</sub>. The organic layer was washed with water and brine, dried over anhydrous Na<sub>2</sub>SO<sub>4</sub>, and concentrated in vacuo. The crude product was purified by silica gel column chromatography in petroleum ether: dichloromethane: ethyl acetate = 40: 10: 1 to afford the product **5** as red oil (178.3 mg, 93% yield, 96:4 er).

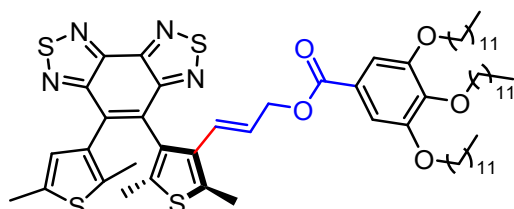

**(E)-3-(4-(5-(2,5-dimethylthiophen-3-yl)benzo[1,2-c:3,4-c']bis([1,2,5]thiadiazole)-4-yl)-2,5-dimethylthiophen-3-yl)allyl 3,4,5-tris(dodecyloxy)benzoate 5:**

The er value was determined by HPLC analysis on a Chiralcel IF-3 column (hexane/isopropanol = 98/2, flow = 0.4

mL/min, 254 nm) with  $t_r = 27.2$  min (minor), 30.4 min (major): 96 : 4 er.  $[\alpha]_D^{20} = 40.0$  ( $c = 1.0$ ,  $\text{CHCl}_3$ )

$^1\text{H NMR}$  (400 MHz,  $\text{CDCl}_3$ )  $\delta$  7.07 (s, 2 H), 7.04 (s, 2 H), 6.44 (s, 1 H), 6.33 (s, 1 H), 6.29 (d,  $J = 16$  Hz, 1 H), 6.20 (d,  $J = 16$  Hz, 1 H), 5.53 - 5.69 (m, 2 H), 4.50 - 4.65 (m, 4 H), 3.90 - 4.08 (m, 12 H), 2.50 (s, 3 H), 2.47 (s, 3 H), 2.39 (s, 3 H), 2.37 (s, 3 H), 2.16 (s, 3 H), 2.05 (s, 3 H), 2.03 (s, 3 H), 1.98 (s, 3 H), 1.70 - 1.88 (m, 12 H), 1.20 - 1.54 (m, 108 H), 0.85 - 0.92 (m, 18 H). ap/p=45/55.

$^{13}\text{C NMR}$  (101 MHz,  $\text{CDCl}_3$ )  $\delta$  165.8, 157.0, 156.9, 156.6, 152.8, 147.5, 147.4, 147.2, 142.4, 142.3, 136.5, 136.4, 135.5, 135.4, 134.1, 133.8, 133.7, 133.3, 133.0, 132.4, 132.3, 131.9, 131.7, 131.3, 130.9, 128.2, 128.1, 127.0, 125.2, 124.7, 124.3, 107.7, 73.5, 69.1, 65.8, 65.7, 32.0, 30.4, 29.8, 29.7, 29.6, 29.5, 29.4, 26.2, 26.1, 22.7, 15.2, 15.0, 14.8, 14.6, 14.3, 14.2, 14.0.

**HRMS (ESI)**  $m/z$ :  $[\text{M}+\text{Na}]^+$  Calculated for  $\text{C}_{64}\text{H}_{94}\text{N}_4\text{O}_5\text{S}_4\text{Na}^+$ : 1149.5999; found: 1149.5998.

### b) Synthesis of 6

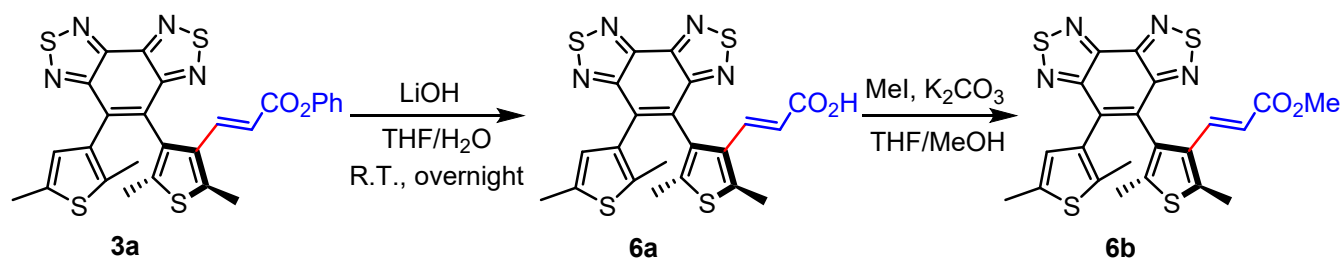

To an oven-dried 10 mL Schlenk tube was added **3a** (112.1 mg, 0.2 mmol), LiOH (14.4 mg, 3.0 equiv), THF/H<sub>2</sub>O (1:1, 4.0 mL). The reaction was allowed to stir at room temperature under argon overnight. Then the reaction was quenched by water, extracted by EtOAc. The combined organic layers were washed with brine, dried over Na<sub>2</sub>SO<sub>4</sub>, and concentrated in vacuo. The crude product was purified by preparative TLC using petroleum ether: dichloromethane: ethyl acetate : acetic acid = 80: 20: 20: 3 to afford the product **6a** as a red foam (89.2 mg, 92% yield).

Then the methylation of acid **6b** was produced by adding K<sub>2</sub>CO<sub>3</sub> (3.0 equiv), MeI (2.0 equiv), in THF/MeOH (2:1, 5 mL), at room temperature stirring for overnight.

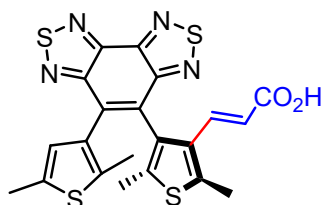

### (E)-3-(4-(5-(2,5-dimethylthiophen-3-yl)benzo[1,2-c:3,4-c']bis[1,2,5]thiadiazole-4-yl)-2,5-dimethylthiophen-3-yl)acrylic acid 6a:

$[\alpha]_D^{20} = 144.9$  ( $c = 1.0$ ,  $\text{CHCl}_3$ )

$^1\text{H NMR}$  (400 MHz,  $\text{DMSO}-d_6$ )  $\delta$  12.10 (s, 2 H), 7.22 (d,  $J = 16.1$  Hz, 1 H), 7.13 (d,  $J = 16.1$  Hz, 1 H), 6.44 (s, 1 H), 6.31 (s, 1 H), 5.57 (t,  $J = 16.3$  Hz, 2 H), 2.49 (s, 3 H), 2.32 (s, 3 H), 2.27 (s, 3 H), 2.10 (s, 3 H), 2.06 (s, 3 H), 2.01 (s, 3

H), 2.00 (s, 3 H), 1.93 (s, 3 H). ap/p=46/54.

$^{13}\text{C}$  NMR (101 MHz, DMSO- $d_6$ )  $\delta$  172.5, 167.9, 156.9, 156.8, 147.8, 147.8, 147.6, 147.5, 138.6, 138.5, 137.2, 137.0, 7136.5, 136.3, 134.9, 134.8, 134.5, 132.9, 132.7, 132.5, 132.4, 132.0, 131.7, 131.5, 130.1, 127.7, 127.6, 119.2, 118.7, 21.5, 15.2, 15.0, 14.9, 14.3, 14.1.

HRMS (ESI)  $m/z$ :  $[\text{M}+\text{H}]^+$  Calculated for  $\text{C}_{21}\text{H}_{17}\text{N}_4\text{O}_2\text{S}_4$ : 485.0229; found: 485.0227.

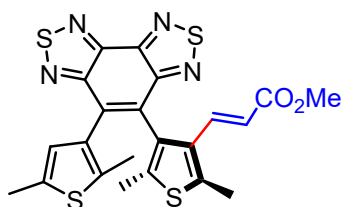

**methyl (E)-3-(4-(5-(2,5-dimethylthiophen-3-yl)benzo[1,2-c:3,4-c']bis[1,2,5]thiadiazole-4-yl)-2,5-dimethylthiophen-3-yl)acrylate 6b:**

The er value was determined by HPLC analysis on a Chiralcel AD-H column (hexane/isopropanol = 90/10, flow = 1.0 mL/min, 254 nm) with  $t_r$  = 7.1 min (major), 5.9 min (minor): 96 : 4 er.

### c) Synthesis of 9, 10, 11

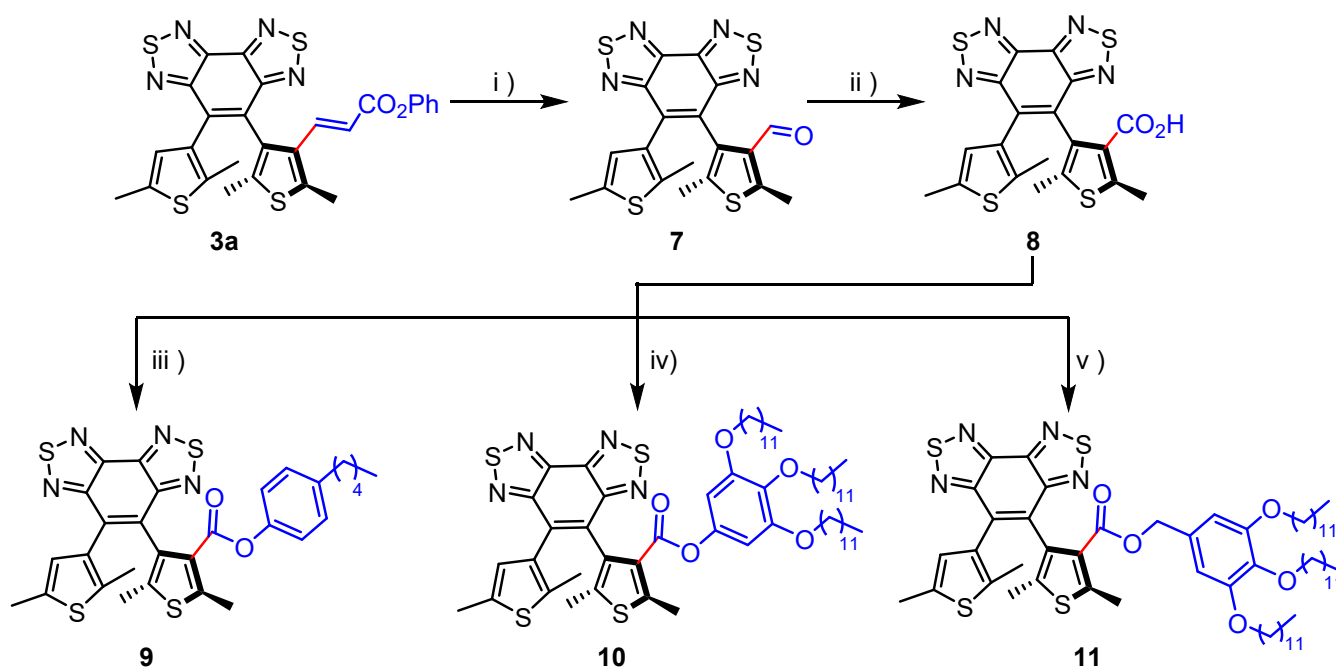

#### i. Synthesis of 7

To a solution of **3a** (829.9 mg, 1.48 mmol) in THF (38 mL) and  $\text{H}_2\text{O}$  (19 mL),  $\text{K}_2\text{OsO}_4 \cdot 2\text{H}_2\text{O}$  (81.8 mg, 0.22 mmol, 15 mol%) and  $\text{NaIO}_4$  (3.17g, 14.8 mmol, 10 equiv) were added at 25 °C. The reaction mixture was stirred at room temperature. The progress of the reaction was monitored by TLC. The reaction mixture was then quenched with saturated

aqueous  $\text{Na}_2\text{S}_2\text{O}_3$  and stirred vigorously for 30 min. The reaction mixture was extracted with EtOAc and then the combined organic layers were washed with brine, dried over anhydrous  $\text{Na}_2\text{SO}_4$ , and concentrated in vacuo. The crude product was purified by silica gel column chromatography in petroleum ether: dichloromethane: ethyl acetate = 15: 4: 1 to afford product **7** as red oil (563.3 mg, 86% yield, 95:5 er).

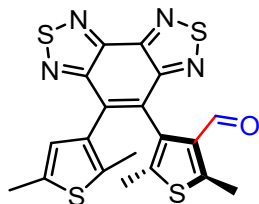

**4-(5-(2,5-dimethylthiophen-3-yl)benzo[1,2-c:3,4-c']bis([1,2,5]thiadiazole)-4-yl)-2,5-dimethylthiophene-3-carbaldehyde 7:**

The er value was determined by HPLC analysis on a Chiralcel OD-H column (hexane/isopropanol = 97/3, flow = 1.0 mL/min, 254 nm) with  $t_r$  = 10.5 min (major), 15.0 min (minor): 95 : 5 er.  $[\alpha]_D^{20}$  = -6.3 (c = 1.0,  $\text{CHCl}_3$ )

**$^1\text{H}$  NMR (400 MHz,  $\text{CDCl}_3$ )**  $\delta$  9.79 (d,  $J$  = 3.6 Hz, 2 H), 6.61 (d,  $J$  = 1.3 Hz, 1 H), 6.19 (d,  $J$  = 1.3 Hz, 1 H), 2.80 (s, 3 H), 2.78 (s, 3 H), 2.44 (s, 3 H), 2.32 (s, 3 H), 2.23 (s, 3 H), 2.00 (s, 6 H), 1.96 (s, 3 H). ap/p=50/50.

**$^{13}\text{C}$  NMR (101 MHz,  $\text{CDCl}_3$ )**  $\delta$  184.4, 184.2, 157.3, 156.6, 150.9, 150.8, 147.7, 147.6, 147.2, 147.1, 136.7, 136.2, 136.1, 136.1, 135.4, 135.1, 131.8, 131.6, 131.5, 131.4, 131.3, 130.8, 130.0, 129.9, 126.9, 15.4, 15.2, 15.0, 14.4, 14.2, 14.1, 14.0, 13.5.

**HRMS (ESI)**  $m/z$ :  $[\text{M}+\text{H}]^+$  Calculated for  $\text{C}_{19}\text{H}_{15}\text{N}_4\text{OS}_4^+$ : 443.0123; found: 443.0123.

ii. Synthesis of **8**

To a stirred solution of **7** (543.7 mg, 1.23 mmol) in *t*-BuOH : THF (12 : 5 mL) at room temperature were sequentially added 2-methyl-2-butene (862.6mg, 12.3 mmol, 10 equiv),  $\text{NaH}_2\text{PO}_4$  solution (12.3 mL, 0.5 M, 6.25 mmol, 5.0 equiv), and  $\text{NaClO}_2$  solution (3.7 mL, 1.0 M, 3.7 mmol, 3.0 equiv). The reaction mixture was stirred at that temperature. The progress of the reaction was monitored by TLC. The reaction mixture was then quenched with saturated aqueous  $\text{NaHSO}_3$ . The resulting mixture was extracted with EtOAc. The combined organic phase was washed with brine, dried over anhydrous  $\text{Na}_2\text{SO}_4$ , and concentrated in vacuo. The crude product was purified by silica gel column chromatography in petroleum ether: dichloromethane: ethyl acetate : acetic acid= 80: 20: 20: 3 to afford the product **8** as red solid (473.8 mg, 84% yield). m.p.  $>200^\circ\text{C}$ .

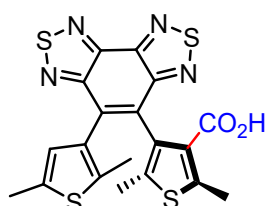

**4-(5-(2,5-dimethylthiophen-3-yl)benzo[1,2-c:3,4-c']bis([1,2,5]thiadiazole)-4-yl)-2,5-dimethylthiophene-3-**

**carboxylic acid 8:** $[\alpha]_{\text{D}}^{20} = 28.2$  ( $c = 1.0$ ,  $\text{CHCl}_3$ ) $^1\text{H NMR}$  (400 MHz,  $\text{DMSO-}d_6$ )  $\delta$  12.39 (s, 2 H), 6.76 (s, 1 H), 6.29 (s, 1 H), 2.69 (s, 3 H), 2.66 (s, 3 H), 2.43 (s, 3 H), 2.30 (s, 3 H), 2.29 (s, 3 H), 2.00 (s, 3 H), 1.96 (s, 3 H), 1.94 (s, 3 H).  $\text{ap/p} = 47/53$ . $^{13}\text{C NMR}$  (101 MHz,  $\text{DMSO-}d_6$ )  $\delta$  164.9, 164.8, 158.0, 157.9, 157.6, 156.8, 147.5, 147.4, 147.2, 147.0, 144.6, 144.5, 136.3, 135.7, 135.0, 134.8, 134.0, 133.7, 133.2, 132.3, 132.1, 131.9, 131.8, 130.5, 130.3, 130.2, 130.0, 128.4, 127.3, 16.1, 15.9, 15.3, 15.2, 14.2, 14.0, 13.5.**HRMS (ESI)**  $m/z$ :  $[\text{M}+\text{H}]^+$  Calculated for  $\text{C}_{19}\text{H}_{15}\text{N}_4\text{O}_2\text{S}_4^+$ : 459.0072; found: 459.0075.iii. Synthesis of **9**

To a solution of **8** (355.4 mg, 0.77 mmol) in dry  $\text{CH}_2\text{Cl}_2$  (7 mL) at room temperature were sequentially added and 4-Pentylphenol (189.7 mg, 1.16 mmol, 1.5 equiv), DMAP (47.0 mg, 0.39 mmol, 0.5 equiv), DCC (317.7 g, 1.54 mmol, 2.0 equiv) under argon atmosphere. The reaction mixture was stirred at that temperature. The progress of the reaction was monitored by TLC. The reaction was quenched by adding water and extracted with  $\text{CH}_2\text{Cl}_2$ . The organic layer was washed with water and brine, dried over anhydrous  $\text{Na}_2\text{SO}_4$ , and concentrated in vacuo. The crude product was purified by silica gel column chromatography in petroleum ether: dichloromethane: ethyl acetate = 15: 4: 1 to afford product **9** as red foam (375.0 mg, 81% yield, 94 : 6 er).

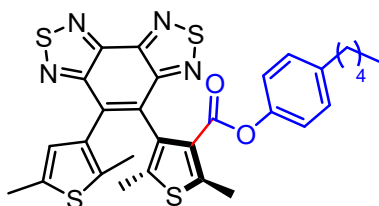**4-pentylphenyl 4-(5-(2,5-dimethylthiophen-3-yl)benzo[1,2-c:3,4-c']bis([1,2,5]thiadiazole)-4-yl)-2,5-dimethylthiophene-3-carboxylate 9:**

The er value was determined by HPLC analysis on a Chiralcel AD-H column (hexane/isopropanol = 90/10, flow = 1.0 mL/min, 254 nm) with  $t_r = 6.7$  min (major), 7.7 min (minor): 94 : 6 er.  $[\alpha]_{\text{D}}^{20} = 6.4$  ( $c = 1.0$ ,  $\text{CHCl}_3$ )

 $^1\text{H NMR}$  (400 MHz,  $\text{CDCl}_3$ )  $\delta$  7.02 (m, 4 H), 6.67 (s, 1 H), 6.35 (s, 1 H), 6.58 (m, 4 H), 2.82 (s, 3 H), 2.80 (s, 3 H), 2.48 - 2.52 (m, 4 H), 2.46 (s, 3 H), 2.35 (s, 3 H), 2.28 (s, 3 H), 2.04 (s, 3 H), 1.99 (s, 3 H), 1.98 (s, 3 H), 1.45 - 1.56 (m, 4 H), 1.20 - 1.33 (m, 8 H), 0.84 (t,  $J = 6.8$  Hz, 6 H).  $\text{ap/p} = 45/55$ . $^{13}\text{C NMR}$  (101 MHz,  $\text{CDCl}_3$ )  $\delta$  162.2, 162.0, 157.9, 157.7, 157.5, 156.7, 147.9, 147.5, 147.4, 147.3, 147.2, 140.6, 140.5, 136.7, 136.2, 135.9, 135.8, 134.8, 134.5, 132.7, 131.3, 131.3, 131.0, 130.9, 129.2, 128.1, 127.7, 127.3, 127.1, 120.8, 35.2, 31.4, 31.1, 22.5, 16.4, 16.2, 15.4, 15.3, 15.2, 14.3, 14.1, 14.0, 13.7.**HRMS (ESI)**  $m/z$ :  $[\text{M}+\text{Na}]^+$  Calculated for  $\text{C}_{30}\text{H}_{28}\text{N}_4\text{O}_2\text{S}_4\text{Na}^+$ : 627.0987; found: 627.0994.

#### iv. Synthesis of **10**

To a solution of **8** (78.2 mg, 0.17 mmol) in dry CH<sub>2</sub>Cl<sub>2</sub> (2 mL) at room temperature were sequentially added and **19** (168.2 mg, 0.26 mmol, 1.5 equiv), DMAP (11.0 mg, 0.09 mmol, 0.5 equiv), DCC (70.2 g, 0.34 mmol, 2.0 equiv) under argon atmosphere. The reaction mixture was stirred at that temperature. The progress of the reaction was monitored by TLC. The reaction was quenched by adding water and extracted with CH<sub>2</sub>Cl<sub>2</sub>. The organic layer was washed with water and brine, dried over anhydrous Na<sub>2</sub>SO<sub>4</sub>, and concentrated in vacuo. The crude product was purified by silica gel column chromatography in petroleum ether: dichloromethane: ethyl acetate = 15: 4: 1 to afford the product **10** as red oil (166.4 mg, 90% yield, 94.5 : 5.5 er).

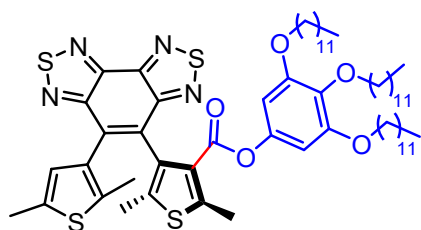

#### 3,4,5-tris(dodecyloxy)phenyl 4-(5-(2,5-dimethylthiophen-3-yl)benzo[1,2-c:3,4-c']bis([1,2,5]thiadiazole)-4-yl)-2,5-dimethylthiophene-3-carboxylate **10**:

The er value was determined by HPLC analysis on a Chiralcel IF-3 column (hexane/isopropanol = 95/5, flow = 1.0 mL/min, 254 nm) with tr = 10.0 min (major), 13.6 min (minor): 94.5 : 5.5 er. [ $\alpha$ ]<sub>D</sub><sup>20</sup> = 30.4 (c = 1.0, CHCl<sub>3</sub>)

<sup>1</sup>H NMR (400 MHz, CDCl<sub>3</sub>)  $\delta$  6.68 (s, 1 H), 6.34 (s, 1 H), 5.82 (s, 1 H), 5.75 (s, 1 H), 3.65 - 3.94 (m, 12 H), 2.82 (s, 3 H), 2.80 (s, 3 H), 2.47 (s, 3 H), 2.35 (s, 3 H), 2.30 (s, 3 H), 2.04 (s, 3 H), 1.98 (s, 6 H), 1.60 - 1.78 (m, 12 H), 1.20 - 1.48 (m, 108 H), 0.84 - 0.92 (m, 18 H). ap/p=46/54.

<sup>13</sup>C NMR (101 MHz, CDCl<sub>3</sub>)  $\delta$  162.0, 161.9, 157.9, 157.9, 157.5, 156.7, 153.2, 147.5, 147.4, 147.3, 145.6, 136.7, 136.3, 135.9, 135.8, 135.6, 134.9, 134.6, 132.6, 132.4, 131.7, 131.3, 131.2, 131.1, 131.0, 130.8, 128.1, 127.6, 127.3, 127.0, 99.4, 99.3, 73.4, 69.0, 32.0, 30.3, 29.8, 29.7, 29.6, 29.4, 29.3, 26.1, 22.7, 16.4, 16.2, 15.4, 15.3, 14.3, 14.2, 13.7.

HRMS (ESI) m/z: [M+H]<sup>+</sup> Calculated for C<sub>61</sub>H<sub>91</sub>N<sub>4</sub>O<sub>5</sub>S<sub>4</sub><sup>+</sup>: 1087.5868; found: 1087.5867.

#### v. Synthesis of **11**

To a solution of **8** (78.2 mg, 0.17 mmol) in dry CH<sub>2</sub>Cl<sub>2</sub> (2 mL) at room temperature were sequentially added and **15** (171.9 mg, 0.26 mmol, 1.5 equiv), DMAP (11.0 mg, 0.09 mmol, 0.5 equiv), DCC (70.2 g, 0.34 mmol, 2.0 equiv) under argon atmosphere. The reaction mixture was stirred at that temperature. The progress of the reaction was monitored by TLC. The reaction was quenched by adding water and extracted with CH<sub>2</sub>Cl<sub>2</sub>. The organic layer was washed with water and brine, dried over anhydrous Na<sub>2</sub>SO<sub>4</sub>, and concentrated in vacuo. The crude product was purified by silica gel column chromatography in petroleum ether: dichloromethane: ethyl acetate = 15: 4: 1 to afford the product **11** as red oil (146.1 mg, 78 % yield, 94.5:5.5 er).

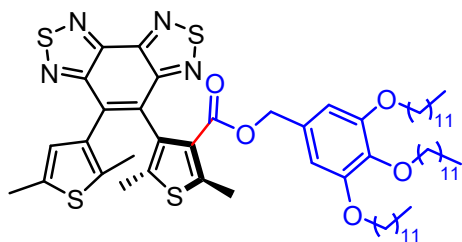

**3,4,5-tris(dodecyloxy)benzyl 4-(5-(2,5-dimethylthiophen-3-yl)benzo[1,2-c:3,4-c']bis([1,2,5]thiadiazole)-4-yl)-2,5-dimethylthiophene-3-carboxylate 11:**

The ee value was determined by HPLC analysis on a Chiralcel IC column (hexane/isopropanol = 90/10, flow = 1.0 mL/min, 254 nm) with  $t_r$  = 4.8 min (major), 23.3 min (minor): 94.5 : 5.5 er.  $[\alpha]_D^{20}$  = 22.2 (c = 1.0, CHCl<sub>3</sub>)

**<sup>1</sup>H NMR (400 MHz, CDCl<sub>3</sub>)**  $\delta$  6.57 (s, 1 H), 6.20 (s, 1 H), 5.97 (s, 2 H), 5.85 (s, 2 H), 4.45 - 4.67 (m, 4 H), 3.50 - 3.97 (m, 12 H), 2.68 (s, 3 H), 2.64 (s, 3 H), 2.37 (s, 3 H), 2.24 (s, 3 H), 2.16 (s, 3 H), 1.94 (s, 3 H), 1.83 (s, 3 H), 1.82 (s, 3 H), 1.60 - 1.78 (m, 12 H), 1.20 - 1.48 (m, 108 H), 0.74 - 0.86 (m, 18 H). ap/p=40/60.

**<sup>13</sup>C NMR (101 MHz, CDCl<sub>3</sub>)**  $\delta$  163.3, 163.2, 157.7, 157.6, 157.3, 156.2, 152.9, 152.7, 147.2, 147.0, 146.9, 146.8, 146.5, 146.4, 138.0, 137.7, 136.3, 136.2, 135.7, 135.5, 134.4, 134.1, 132.3, 132.2, 131.7, 131.5, 131.4, 130.9, 130.4, 129.5, 129.3, 128.6, 128.2, 127.4, 126.8, 106.5, 106.1, 73.4, 73.3, 68.9, 68.7, 66.6, 66.5, 32.0, 30.4, 29.8, 29.7, 29.5, 29.4, 26.2, 26.1, 22.7, 16.0, 15.8, 15.3, 15.2, 14.2, 14.0, 13.6.

**HRMS (ESI) m/z:** [M+Na]<sup>+</sup> Calculated for C<sub>62</sub>H<sub>92</sub>N<sub>4</sub>O<sub>5</sub>S<sub>4</sub>Na<sup>+</sup>: 1123.5843; found: 1123.5845.

**d) Synthesis of 14**

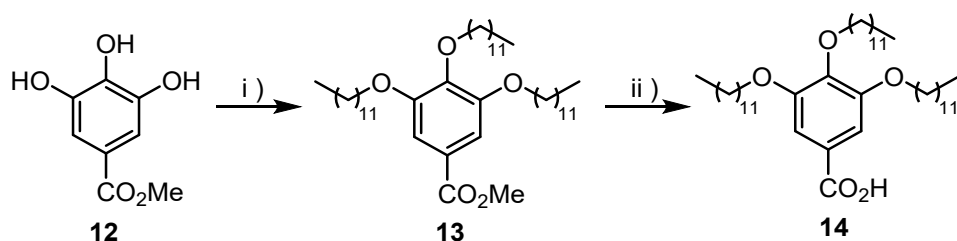

**i. Synthesis of 13**

To an oven-dried 100 mL round-bottom flask was added **12** (3.68 g, 20 mmol) and K<sub>2</sub>CO<sub>3</sub> (11.06 g, 80 mmol, 4.0 equiv), dry DMF (60 mL). The flask was charged with Ar for more than three times. Treat the suspension with 1-bromododecane (17.94 g, 72 mmol, 3.6 equiv). The reaction mixture was allowed to stir vigorously at 70 °C overnight. The reaction was quenched by adding water and extracted with Et<sub>2</sub>O for three times. The combined organic layers were washed with 0.5M HCl, water and brine, dried over Na<sub>2</sub>SO<sub>4</sub>, and concentrated in vacuo. The crude product was purified by silica gel column chromatography in petroleum ether: dichloromethane: ethyl acetate = 90: 10: 1 to afford the product **13** as white solid (10.34 g, 75%). m.p. 43.4-43.8°C.



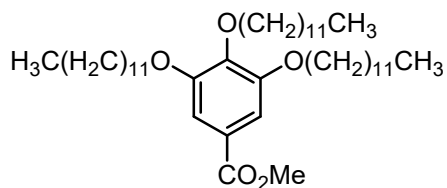

**methyl 3,4,5-tris(dodecyloxy)benzoate 13:**

**<sup>1</sup>H NMR (400 MHz, CDCl<sub>3</sub>)** δ 7.26 (s, 2 H), 4.06 - 3.97 (m, 6 H), 3.88 (s, 3 H), 1.85 - 1.71 (m, 6 H), 1.51 - 1.44 (m, 6 H), 1.37 - 1.27 (m, 48 H), 0.88 (t, *J* = 6.7 Hz, 6 H).

**<sup>13</sup>C NMR (101 MHz, CDCl<sub>3</sub>)** δ 166.97, 152.86, 142.33, 124.69, 107.93, 73.51, 69.15, 52.13, 32.01, 30.40, 29.83, 29.81, 29.78, 29.74, 29.71, 29.64, 29.47, 29.45, 29.36, 26.15, 26.13, 22.77, 14.18.

**HRMS (ESI) m/z:** [M+H]<sup>+</sup> Calculated for C<sub>44</sub>H<sub>81</sub>O<sub>5</sub>: 689.6079; found: 689.6082.

ii. Synthesis of **14**

To an oven-dried 50 mL round-bottom flask was added **13** (3.45 g, 5 mmol) and NaOH (0.40 g, 10 mmol, 2.0 equiv), MeOH/H<sub>2</sub>O (1:2, 6 mL). A reflux condenser was affixed to the flask, and the mixture was heated to reflux overnight. After completion, the mixture was concentrated in vacuo. The mixture was neutralized by 2M HCl and extracted with DCM. The combined organic layers were washed with water and brine, dried over anhydrous Na<sub>2</sub>SO<sub>4</sub>, filtered and concentrated in vacuo. The crude product was purified by silica gel column chromatography in petroleum ether: ethyl acetate: acetic acid = 180: 20: 1 to afford the product **14** as white solid (2.94 g, 87%). m.p. 56.8-58.2°C.

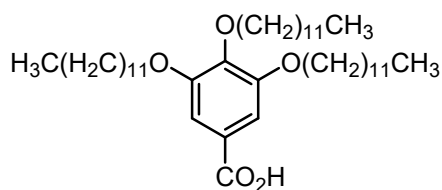

**3,4,5-tris(dodecyloxy)benzoic acid 14:**

**<sup>1</sup>H NMR (400 MHz, CDCl<sub>3</sub>)** δ 11.35 (s, 1 H), 7.37 (s, 2 H), 4.12 - 4.02 (m, 6 H), 1.89 - 1.76 (m, 6 H), 1.55 - 1.48 (m, 6 H), 1.41 - 1.30 (m, 48 H), 0.92 (t, *J* = 6.6 Hz, 9 H).

**<sup>13</sup>C NMR (101 MHz, CDCl<sub>3</sub>)** δ 172.3, 152.9, 143.2, 123.7, 108.6, 73.6, 69.2, 32.0, 30.4, 29.8, 29.7, 29.6, 29.5, 29.4, 29.3, 26.2, 26.1, 22.8, 14.2.

**HRMS (ESI) m/z:** [M-H]<sup>-</sup> Calculated for C<sub>43</sub>H<sub>77</sub>O<sub>5</sub>: 673.5776; found: 673.5775.

### e) Synthesis of 15

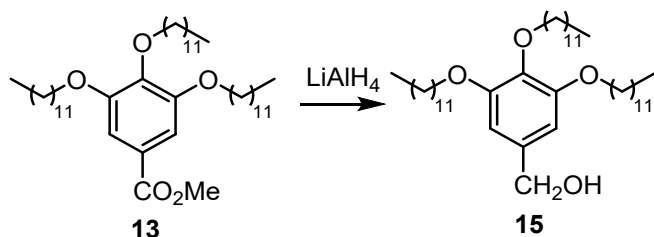

To an oven-dried 100 mL round-bottom flask was added  $\text{LiAlH}_4$  (493.4 mg, 13 mmol), dry THF (20 mL). The flask was charged with Ar for more than three times. Treat the suspension dropwise with a solution of **13** (6.89 g, 10 mmol) in THF (30 mL) at 0 °C over a period of 10 minutes. The reaction mixture was stirred at room temperature. The progress of the reaction was monitored by TLC. The reaction was quenched by slow addition of isopropyl alcohol (2 mL), water (3 mL) and 15% NaOH solution (2 mL). Filter the insoluble salts through a pad of Celite and concentrate the filtrate under reduced pressure. The residue obtained was dissolved in  $\text{CH}_2\text{Cl}_2$ . The organic layers were washed with water, brine, dried over  $\text{Na}_2\text{SO}_4$ , and concentrated in vacuo. The crude product was purified by silica gel column chromatography in petroleum ether: dichloromethane: ethyl acetate = 15: 4: 1 to afford the product **15** as white solid (5.62 g, 85%). m.p. 47.2-49°C.

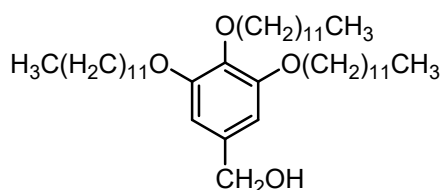

#### **(3,4,5-tris(dodecyloxy)phenyl)methanol 15:**

$^1\text{H}$  NMR (400 MHz,  $\text{CDCl}_3$ )  $\delta$  6.55 (s, 2 H), 4.58 (s, 2 H), 3.98 - 3.91 (m, 6 H), 1.83 - 1.70 (m, 7 H), 1.50 - 1.42 (m, 6 H), 1.36 - 1.30 (m, 48 H), 0.88 (t,  $J = 6.6$  Hz, 9 H).

$^{13}\text{C}$  NMR (101 MHz,  $\text{CDCl}_3$ )  $\delta$  153.3, 137.5, 136.1, 105.3, 73.5, 69.1, 65.7, 32.0, 30.4, 29.8, 29.7, 29.5, 29.4, 26.2, 22.8, 14.2.

HRMS (ESI)  $m/z$ :  $[\text{M}+\text{H}]^+$  Calculated for  $\text{C}_{43}\text{H}_{81}\text{O}_4$ : 661.6129; found: 661.6131.

### f) Synthesis of 19

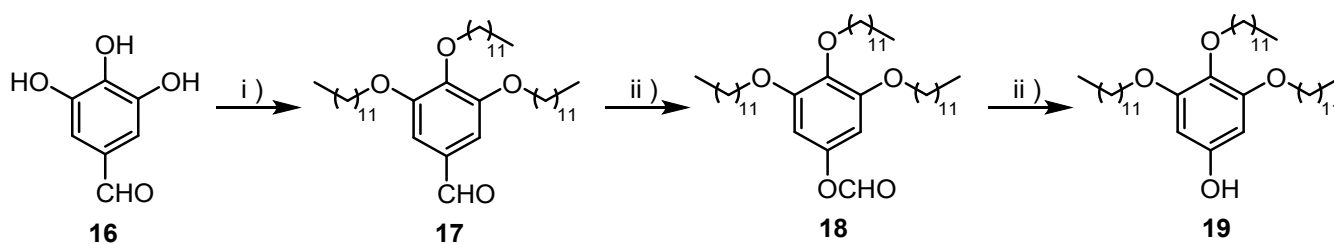

### i. Synthesis of **17**

To an oven-dried 100 mL round-bottom flask was added **16** (3.08 g, 20 mmol) and  $\text{K}_2\text{CO}_3$  (11.06 g, 80 mmol, 4.0 equiv), dry DMF (60 mL). The flask was charged with Ar for more than three times. Treat the suspension with 1-bromododecane (17.94 g, 72 mmol, 3.6 equiv). The reaction mixture was allowed to stir vigorously at 70 °C overnight. The reaction was quenched by adding water and extracted with  $\text{Et}_2\text{O}$  for three times. The combined organic layers were washed with 0.5M HCl, water and brine, dried over  $\text{Na}_2\text{SO}_4$ , and concentrated in vacuo. The crude product was purified by silica gel column chromatography in petroleum ether: ethyl acetate = 200 : 1 to afford the product **17** as white solid (8.96 g, 68%). m.p. 49.1-49.8°C.

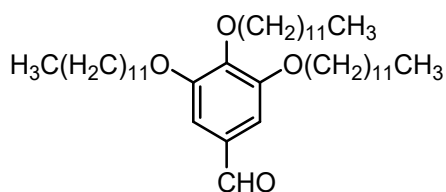

### 3,4,5-tris(dodecyloxy)benzaldehyde **17**:

$^1\text{H NMR}$  (400 MHz,  $\text{CDCl}_3$ )  $\delta$  9.83 (s, 1 H), 7.08 (s, 2 H), 4.16 - 3.97 (m, 6 H), 1.86 - 1.72 (m, 6 H), 1.51 - 1.44 (m, 6 H), 1.37 - 1.26 (m, 48 H), 0.88 (t,  $J = 6.7$  Hz, 10 H).

$^{13}\text{C NMR}$  (101 MHz,  $\text{CDCl}_3$ )  $\delta$  191.4, 153.6, 143.8, 131.5, 107.8, 73.7, 69.3, 32.0, 30.4, 29.8, 29.7, 29.6, 29.5, 29.4, 29.3, 26.1, 22.8, 14.2.

**HRMS (ESI)**  $m/z$ :  $[\text{M}+\text{H}]^+$  Calculated for  $\text{C}_{43}\text{H}_{79}\text{O}_4$ : 659.5973; found: 659.5976.

### ii. Synthesis of **19**

To a stirred solution of **17** (659.1 mg, 1 mmol) in dry  $\text{CH}_2\text{Cl}_2$  (5 mL) was added m-CPBA (85%, 304.5 mg, 1.5 mmol, 1.5 equiv) in portions at 0 °C over a period of 10 minutes. After 1 h, cooling was removed and the mixture was stirred at 50 °C overnight. The mixture was diluted with  $\text{CH}_2\text{Cl}_2$  and washed with sat.  $\text{NaHCO}_3$ . The organic layers were washed with water, brine, dried over  $\text{Na}_2\text{SO}_4$ , and concentrated in vacuo to afford the crude product **18** without further purification.

To a stirred solution of **18** in MeOH (1 mL) was added KOH (56.1 mg, 1 mmol). The reaction mixture was stirred at room temperature for 30 min. The progress of the reaction was monitored by TLC. The residue obtained was dissolved in  $\text{H}_2\text{O}$ , and acidified with 1 M HCl to pH 5-6. The mixture was extracted with  $\text{CH}_2\text{Cl}_2$  for three times. The combined

organic layers were washed with brine, dried over Na<sub>2</sub>SO<sub>4</sub>, and concentrated in vacuo. The crude product was purified by silica gel column chromatography in petroleum ether: dichloromethane: ethyl acetate = 9:1 to afford the product **19** as brown solid (401.8 mg, 62%). m.p. 52.3-53.5°C.

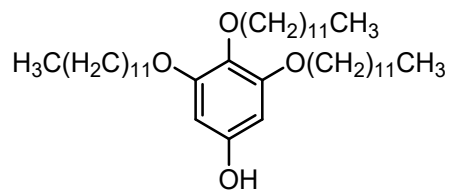

**3,4,5-tris(dodecyloxy)phenol 19:**

**<sup>1</sup>H NMR (400 MHz, CDCl<sub>3</sub>)** δ 6.01 (s, 2 H), 5.34 (s, 1 H), 3.88 - 3.82 (m, 6 H), 1.79 - 1.66 (m, 6 H), 1.46 - 1.41 (m, 6 H), 1.32 - 1.26 (m, 48 H), 0.88 (t, *J* = 6.6 Hz, 9 H).

**<sup>13</sup>C NMR (101 MHz, CDCl<sub>3</sub>)** δ 153.5, 152.1, 131.5, 94.1, 73.8, 68.9, 32.0, 30.3, 29.9, 29.8, 29.7, 29.5, 29.4, 26.2, 22.79, 14.2.

**HRMS (ESI) m/z:** [M+H]<sup>+</sup> Calculated for C<sub>42</sub>H<sub>79</sub>O<sub>4</sub>: 647.5976; found: 647.5973.

### 3. Computational Data of BTTE and **1b**

The rotation barrier of the parallel conformers of BTTE and **1b** was calculated. Density functional theory (DFT) geometry optimization calculations were performed with M06-2X functional and def2-SVP basis set using Gaussian 16<sup>S3</sup>. THF was used in the SMD solvation model for energy calculation of optimized geometries. Gibbs free energy was calculated at 298.15K using Shermo 2.6<sup>S4</sup>.

**Table S2.** Computational data and structures of BTTE-p and **1b**.

|                                   | BTTE-p                                                                             | BTTE-TS                                                                            | <b>1b-p</b>                                                                         | <b>1b-TS</b>                                                                         |
|-----------------------------------|------------------------------------------------------------------------------------|------------------------------------------------------------------------------------|-------------------------------------------------------------------------------------|--------------------------------------------------------------------------------------|
| Structure                         | 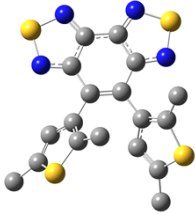 |  |  |  |
| E/Hartree                         | -2506.0974870                                                                      | -2506.0682780                                                                      | -2051.7228040                                                                       | -2051.7153000                                                                        |
| G/Hartree                         | -2505.8580611                                                                      | -2505.8277326                                                                      | -2051.4948196                                                                       | -2051.4866946                                                                        |
| $\Delta G/(\text{kcal mol}^{-1})$ | 19.03                                                                              |                                                                                    | 5.10                                                                                |                                                                                      |

## 4. Crystallographic Data of **8**

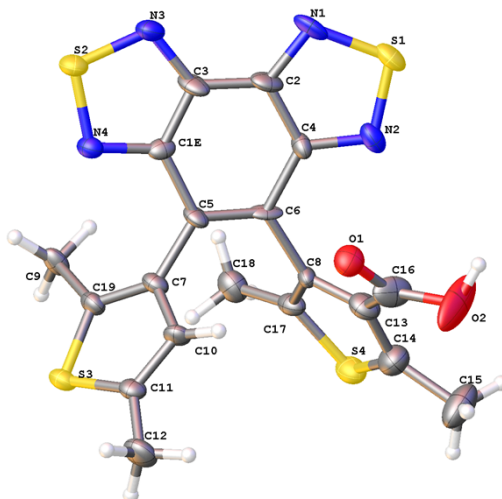

**Fig. S1.** Single crystal structure of **8**.

**Table S3.** Crystal data and structure refinement for **8**.

| Compound          | <b>8</b>                |
|-------------------|-------------------------|
| CCDC Number       | 2359686                 |
| Empirical formula | $C_{19}H_{14}N_4O_2S_4$ |
| Formula weight    | 458.58                  |
| Temperature / K   | 170.00                  |
| Wavelength / Å    | 1.34139                 |
| Crystal system    | Triclinic               |
| Space group       | P1                      |
| a / Å             | 7.7696(4)               |
| b / Å             | 15.7256(8)              |
| c / Å             | 19.9214(10)             |
| $\alpha$ / deg    | 97.434(2)               |

|                                           |                                                                |
|-------------------------------------------|----------------------------------------------------------------|
| $\beta$ / deg                             | 92.683(2)                                                      |
| $\gamma$ / deg                            | 90.008(2)                                                      |
| Volume / $\text{\AA}^3$                   | 2410.9(2)                                                      |
| Z                                         | 4                                                              |
| Density (calculated) / $\text{mg/mm}^3$   | 1.263                                                          |
| Absorption coefficient / $\text{mm}^{-1}$ | 2.505                                                          |
| F(000)                                    | 944                                                            |
| Crystal size / $\text{mm}^3$              | 0.17 x 0.17 x 0.05                                             |
| Theta range for data collection / deg     | 2.465 to 54.876                                                |
| Index ranges                              | $-9 \leq h \leq 9$ , $-19 \leq k \leq 19$ , $0 \leq l \leq 24$ |
| Reflections collected                     | 8958                                                           |
| Independent reflections                   | 8958 [R(int) = ?]                                              |
| Completeness to $\theta = 53.594^\circ$   | 98.0 %                                                         |
| Absorption correction                     | Semi-empirical from equivalents                                |
| Max. and min. transmission                | 0.7508 and 0.5502                                              |
| Refinement method                         | Full-matrix least-squares on F2                                |
| Data / restraints / parameters            | 8958 / 33 / 1065                                               |
| Goodness-of-fit on F2                     | 1.037                                                          |
| Final R indices [ $I > 2\sigma(I)$ ]      | $R_1 = 0.0665$ , $wR_2 = 0.1691$                               |
| R indices (all data)                      | $R_1 = 0.0936$ , $wR_2 = 0.1890$                               |
| Absolute structure parameter              | 0.02(2)                                                        |

---

## 5. 2D Spectra and $^{13}\text{C}$ NMR Assignments of **9**

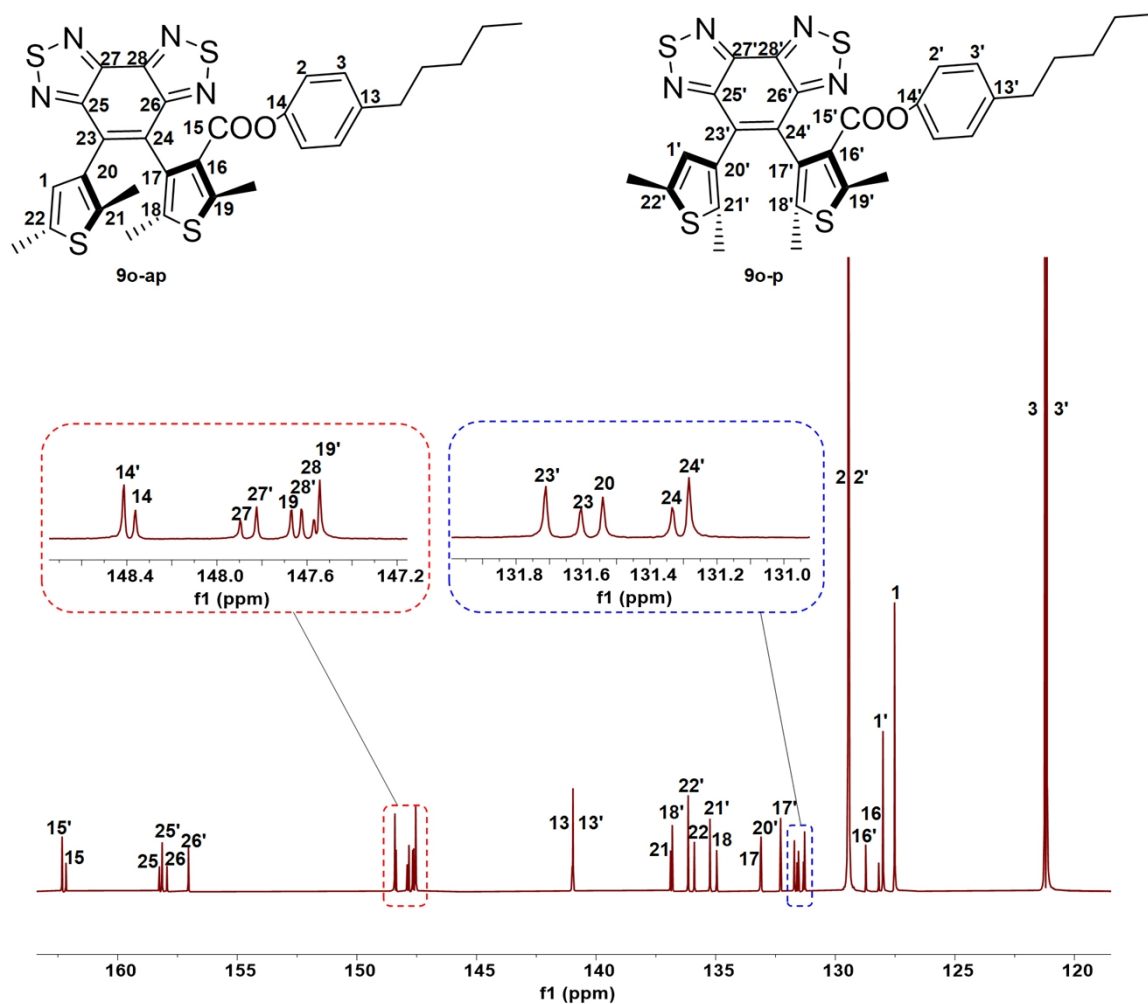

Fig. S2. Assignment of  $^{13}\text{C}$  NMR spectrum of **9** in low field.



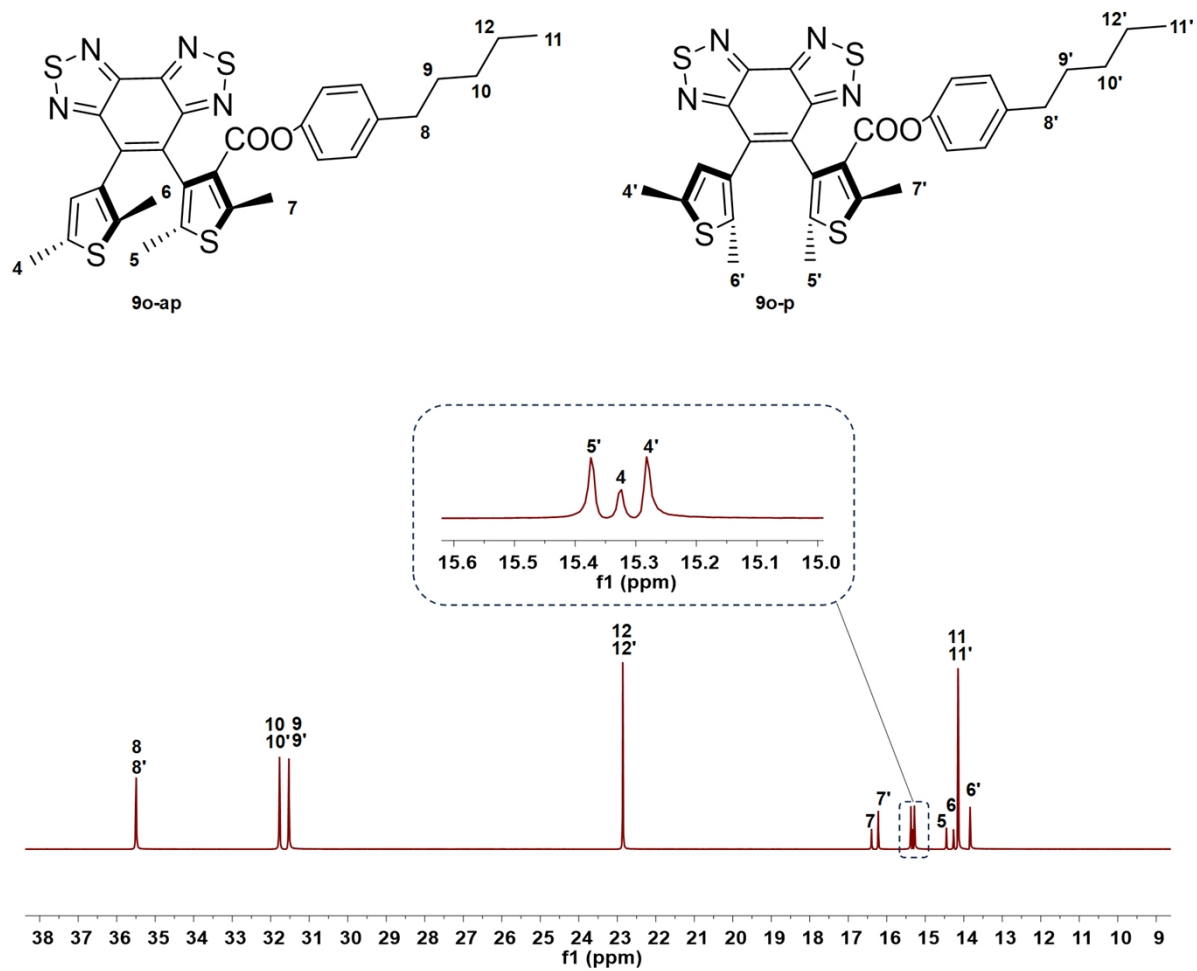

**Fig. S3.** Assignment of  $^{13}\text{C}$  NMR spectrum of **9** in high field.

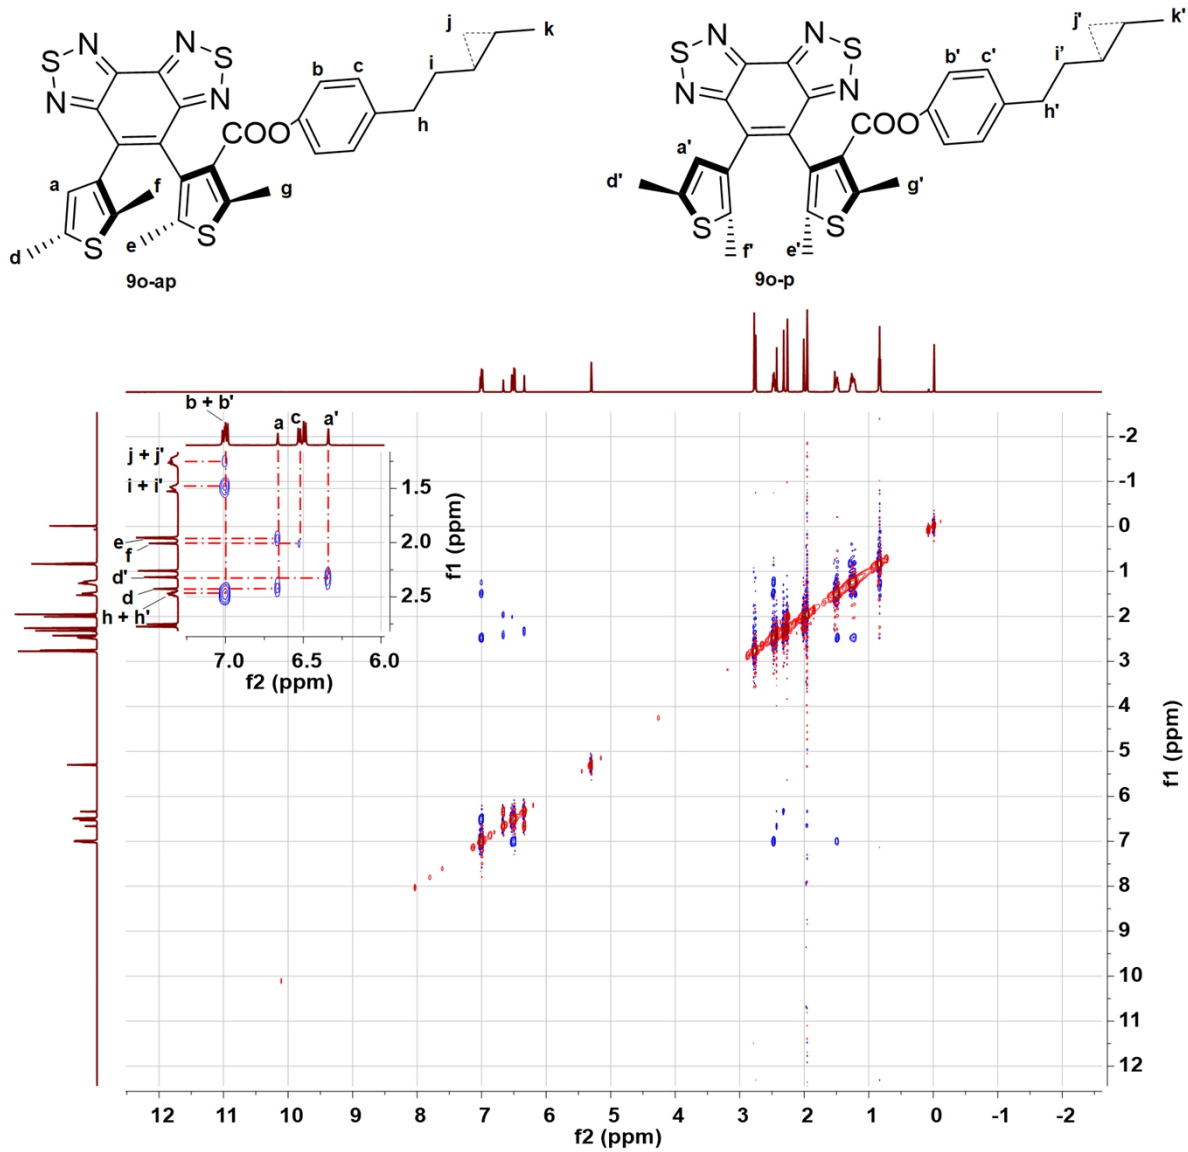

Fig. S4. 2D NOESY spectrum of 9.

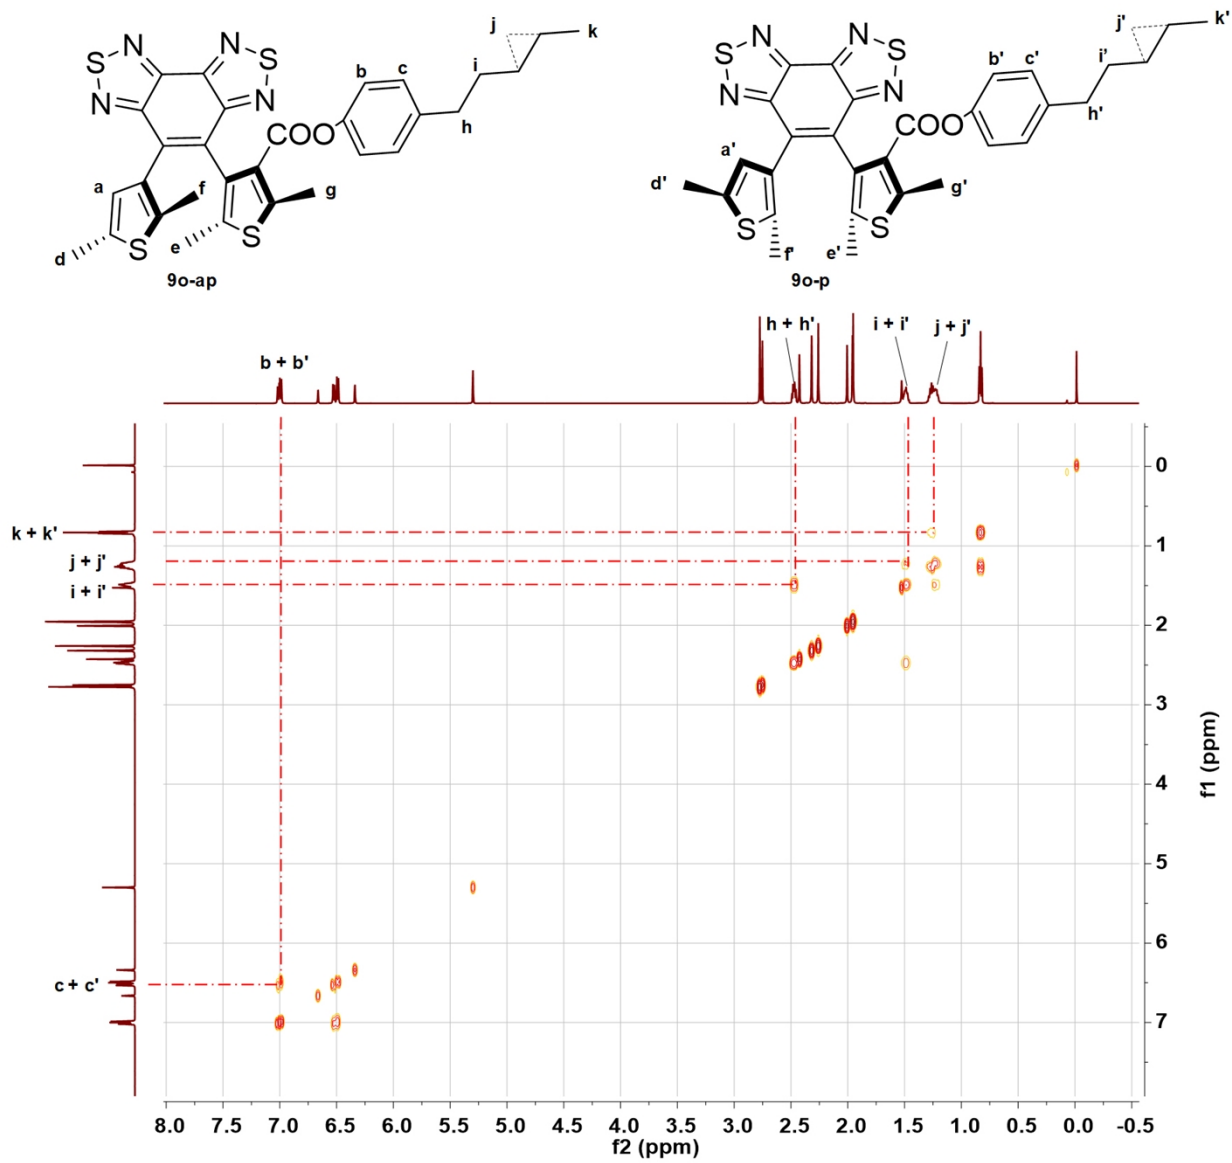

Fig. S5. 2D COSY spectrum of **9**.

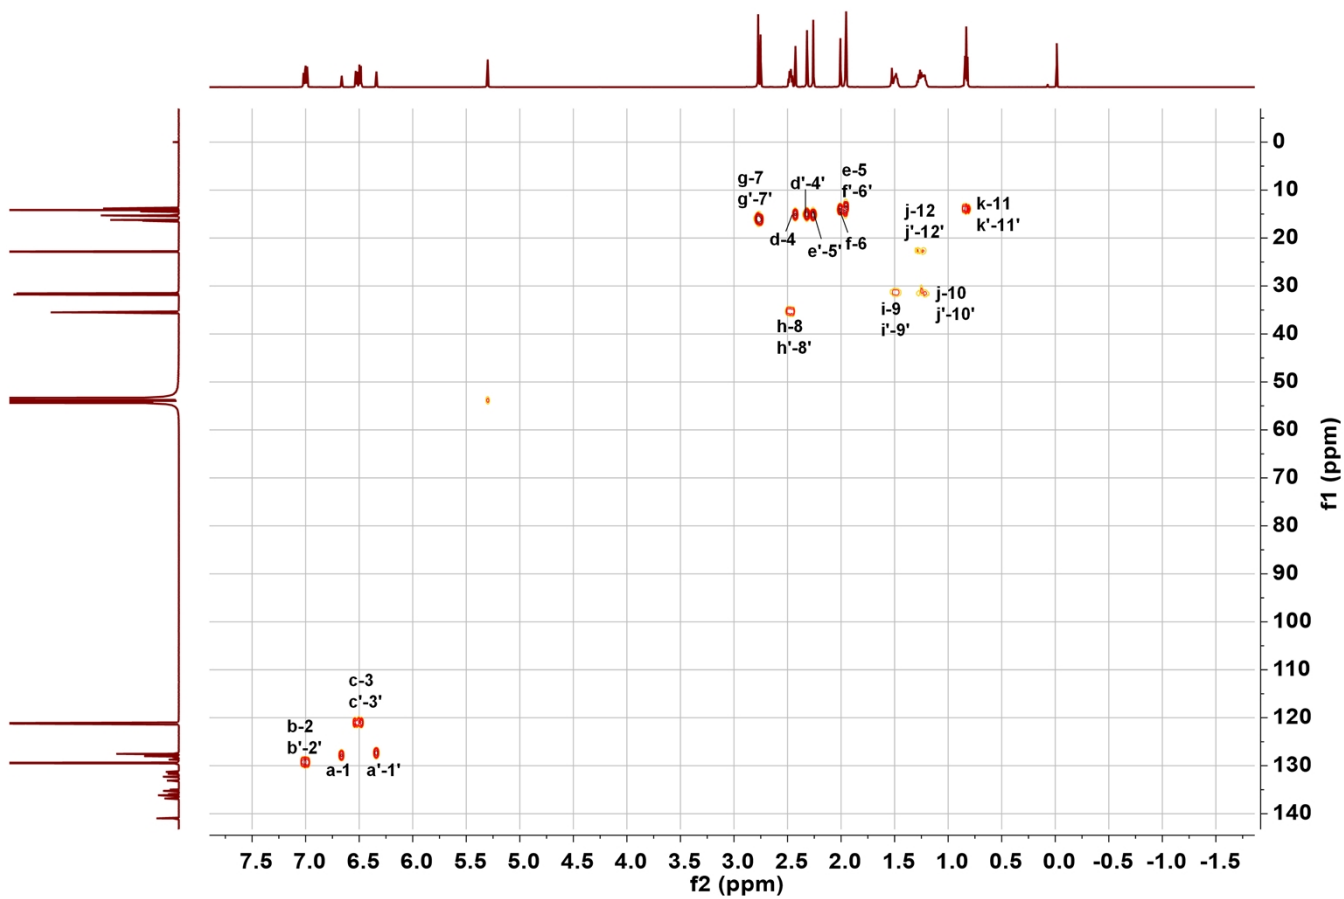

Fig. S6. 2D HMQC spectrum of 9.

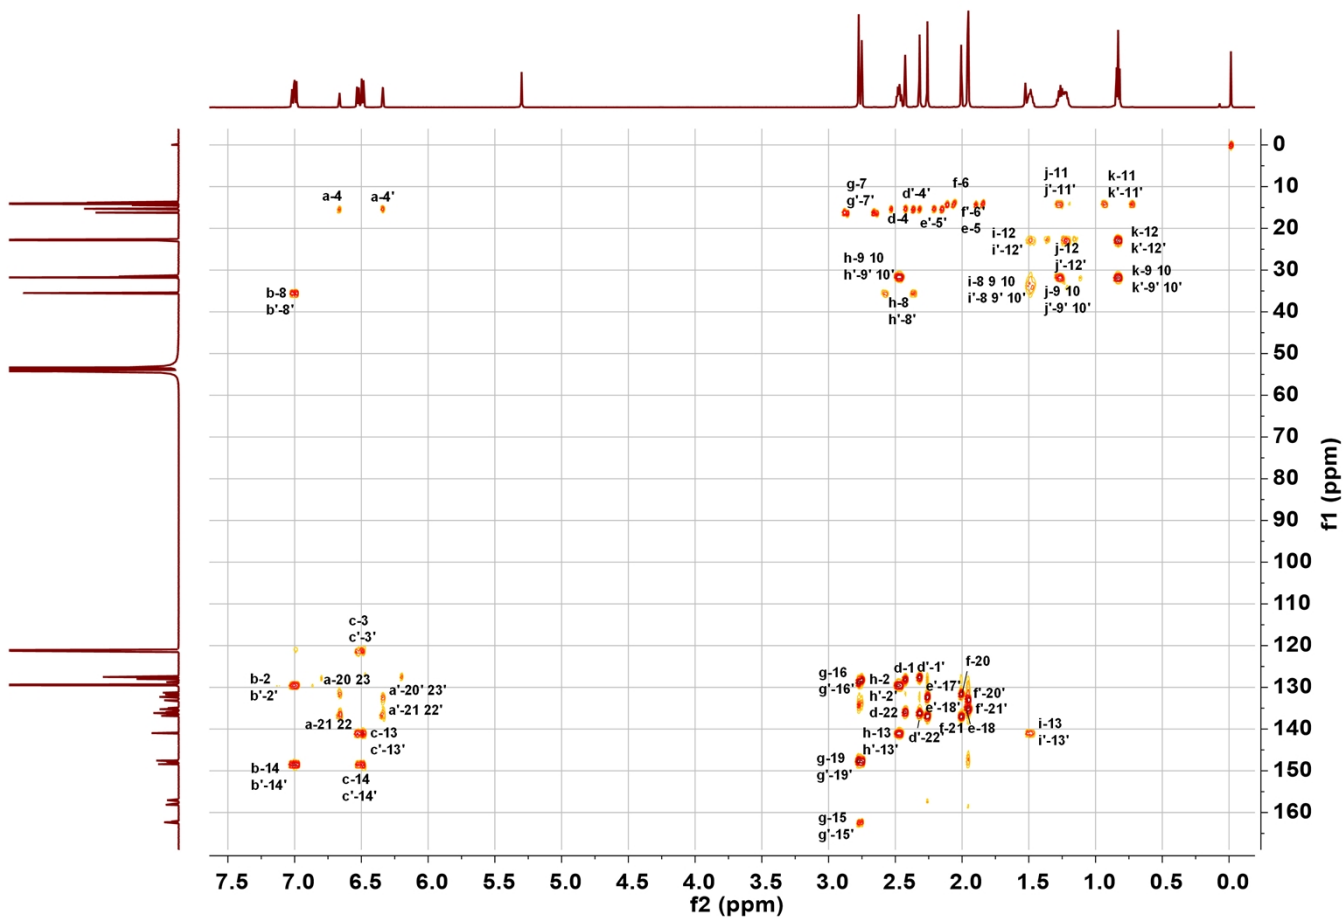

Fig. S7. 2D HMBC spectrum of 9.

## 6. Photochromic and Chiral Regulation Properties

### 6.1 Absorption Changes of **10** and **11**

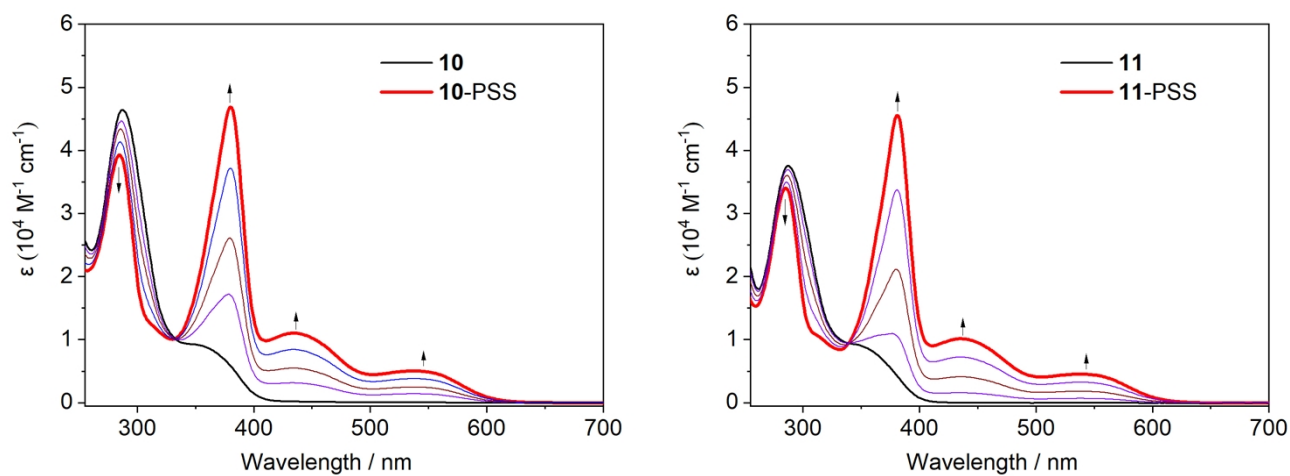

**Fig. S8.** UV-Vis spectra of **10** and **11** during irradiation of UV light ( $\lambda = 313 \text{ nm}$ ) ( $c = 4 \times 10^{-5} \text{ M}$ , THF).

### 6.2 Fatigue Resistance Experiments

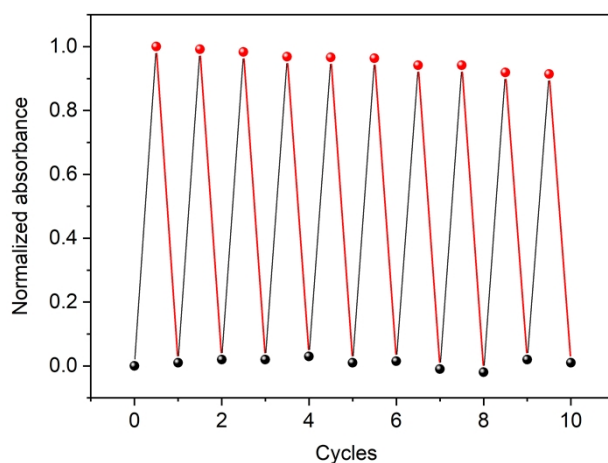

**Fig. S9.** Absorbance changes at 535 nm of **9** alternatively irradiated by UV light ( $\lambda = 313 \text{ nm}$ ) and visible light ( $\lambda > 490 \text{ nm}$ ) ( $c = 4 \times 10^{-5} \text{ M}$ , THF).

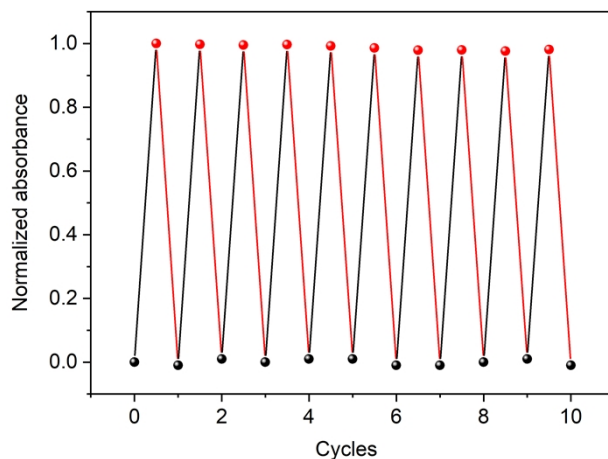

**Fig. S10.** Absorbance changes at 535 nm of **10** alternatively irradiated by UV light ( $\lambda = 313$  nm) and visible light ( $\lambda > 490$  nm) ( $c = 4 \times 10^{-5}$  M, THF).

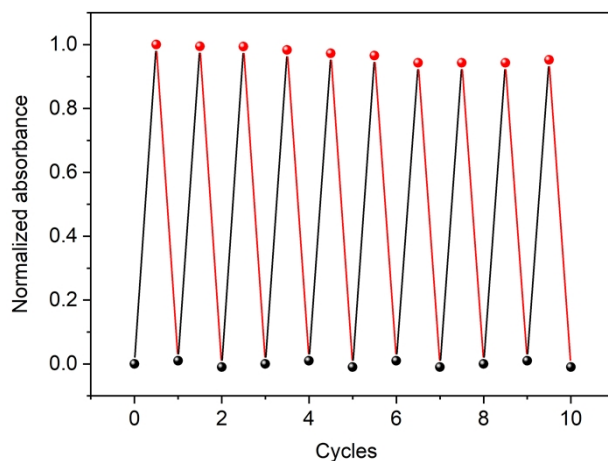

**Fig. S11.** Absorbance changes at 535 nm of **11** alternatively irradiated by UV light ( $\lambda = 313$  nm) and visible light ( $\lambda > 490$  nm) ( $c = 4 \times 10^{-5}$  M, THF).

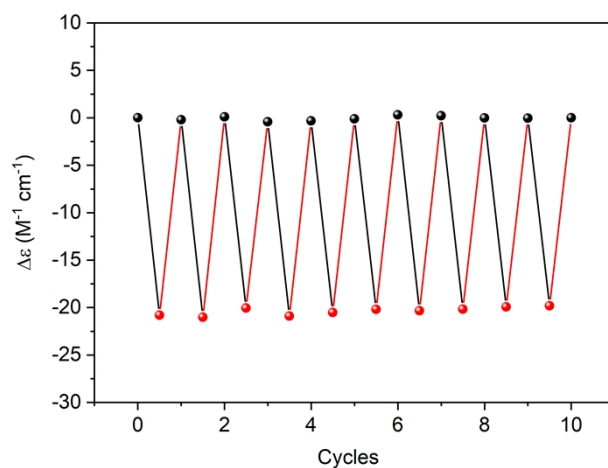

**Fig. S12.** Changes of CD signals of **10** at 535 nm during alternatively irradiation with UV light ( $\lambda = 313$  nm) and visible light ( $\lambda > 490$  nm) ( $c = 4 \times 10^{-5}$  M, THF).

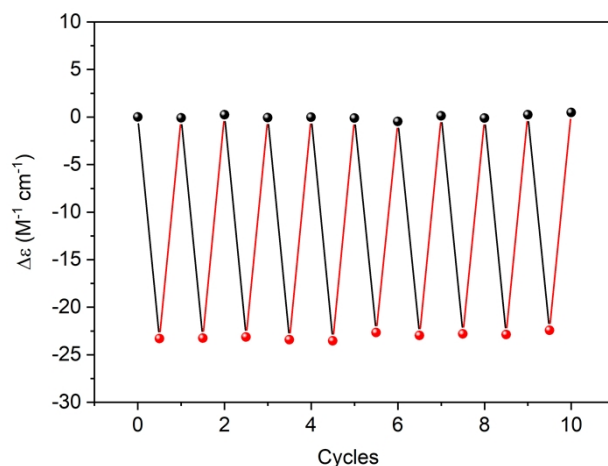

**Fig. S13.** Changes of CD signals of **11** at 535 nm during alternatively irradiation with UV light ( $\lambda = 313$  nm) and visible light ( $\lambda > 490$  nm) ( $c = 4 \times 10^{-5}$  M, THF).

### 6.3 Thermal Stability Tests

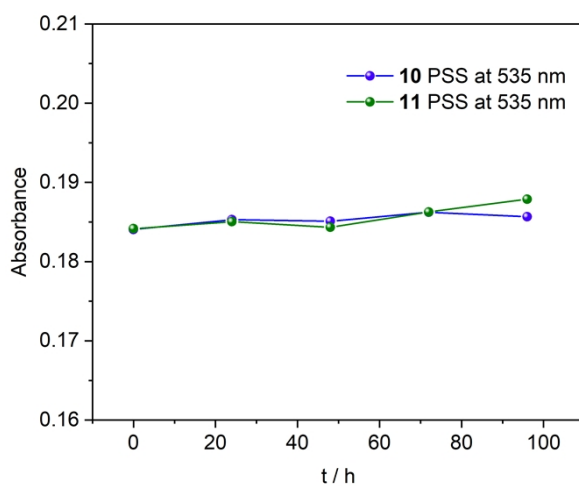

**Fig. S14.** Absorbance changes of **10** and **11** at PSS at 535 nm during 96 h ( $T = 298$  K) ( $c = 4 \times 10^{-5}$  M, THF).

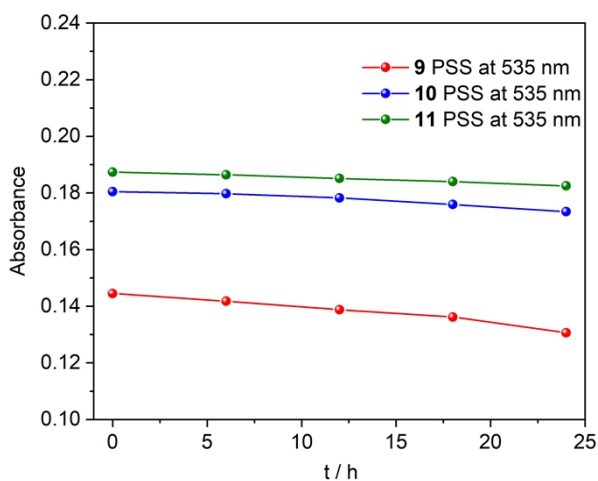

**Fig. S15.** Absorbance changes of **9**, **10** and **11** at PSS at 535 nm during 24 h ( $T = 333$  K) ( $c = 4 \times 10^{-5}$  M, THF).



## 6.4 Conversion Ratio of 9, 10 and 11 under UV Light Irradiation ( $\lambda = 313 \text{ nm}$ )

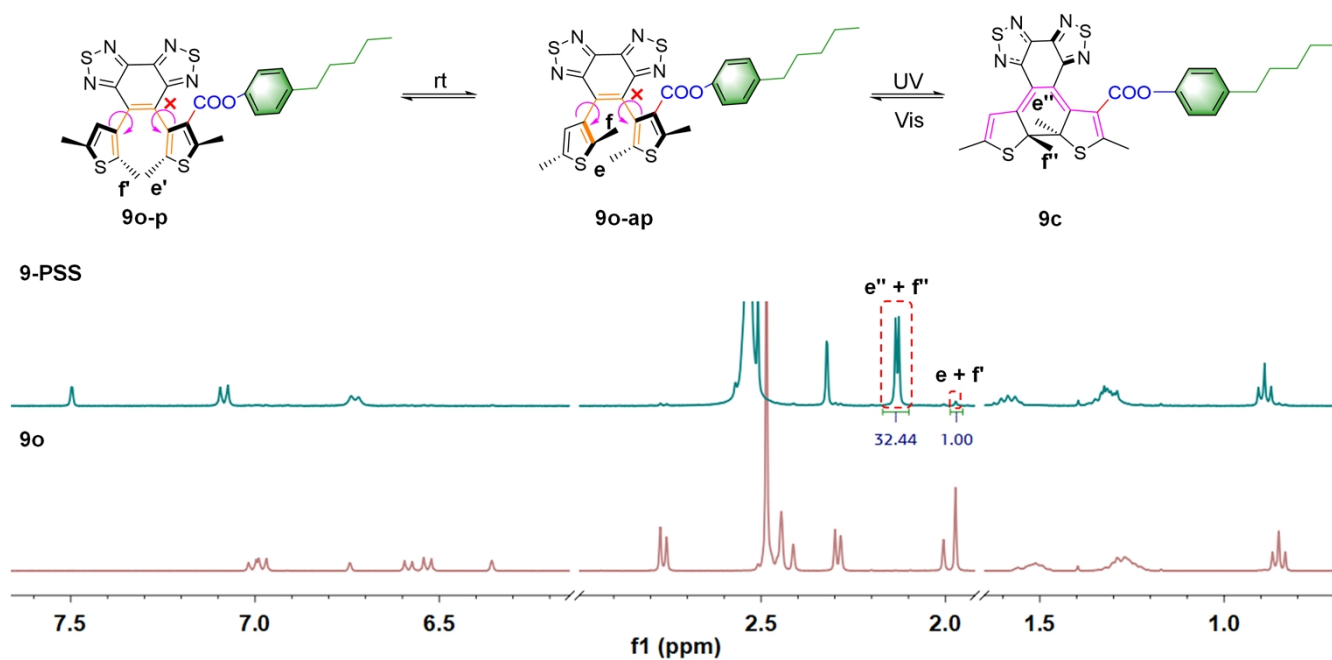

**Fig. S16.** Changes of  $^1\text{H}$  NMR spectra of **9** at open state and PSS ( $c = 5 \times 10^{-3} \text{ M}$ , THF-d<sub>8</sub>). The integration of  $\text{H}_{\text{e}} + \text{H}_{\text{f}'}$  should represent 3 actual protons of **9o** and the integration of  $\text{H}_{\text{e}''} + \text{H}_{\text{f}''}$  should represent 6 actual protons of **9c**. Thus, the conversion ratio should be  $32.44/[2*(32.44/2+1)] = 94\%$

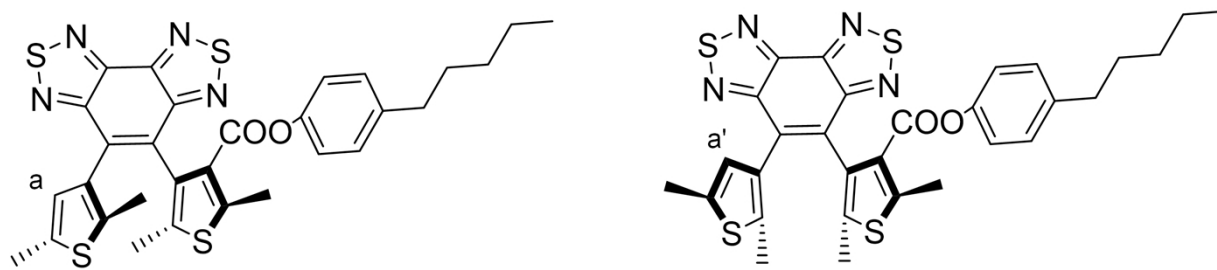

CD<sub>2</sub>Cl<sub>2</sub>

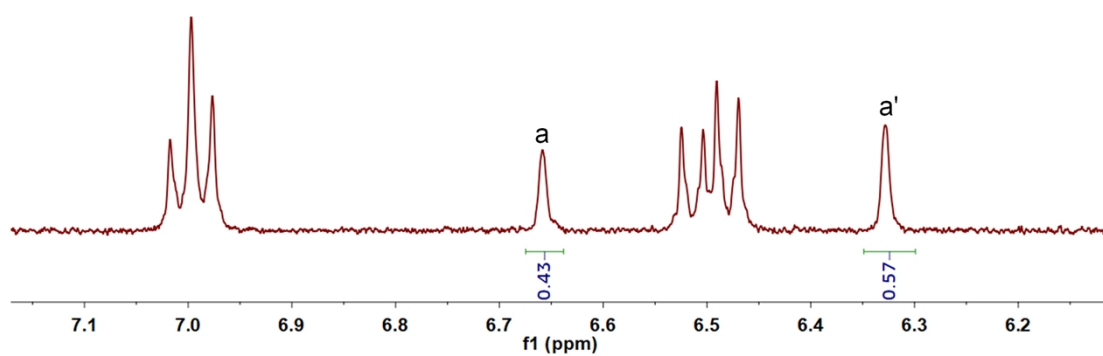

THF-d8

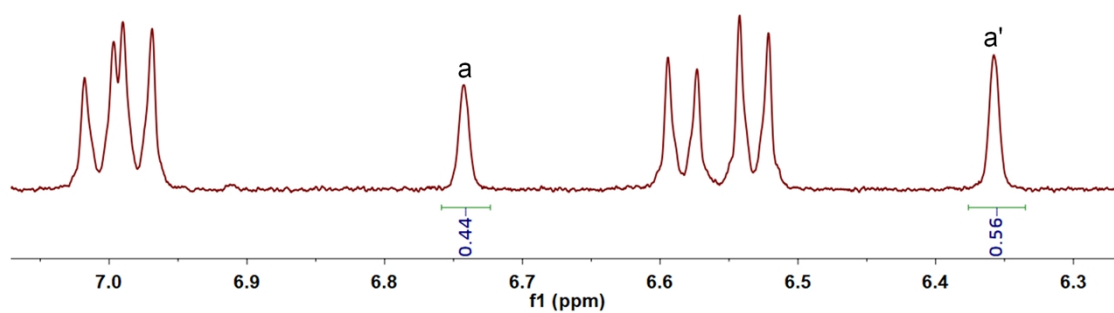

**Fig. S17.** Partial <sup>1</sup>H NMR spectra of **9** in CD<sub>2</sub>Cl<sub>2</sub> and THF-d<sub>8</sub>. The ratio of 9<sub>o-ap</sub> and 9<sub>o-p</sub> is 43/57 in CD<sub>2</sub>Cl<sub>2</sub> and 44/56 in THF-d<sub>8</sub>.

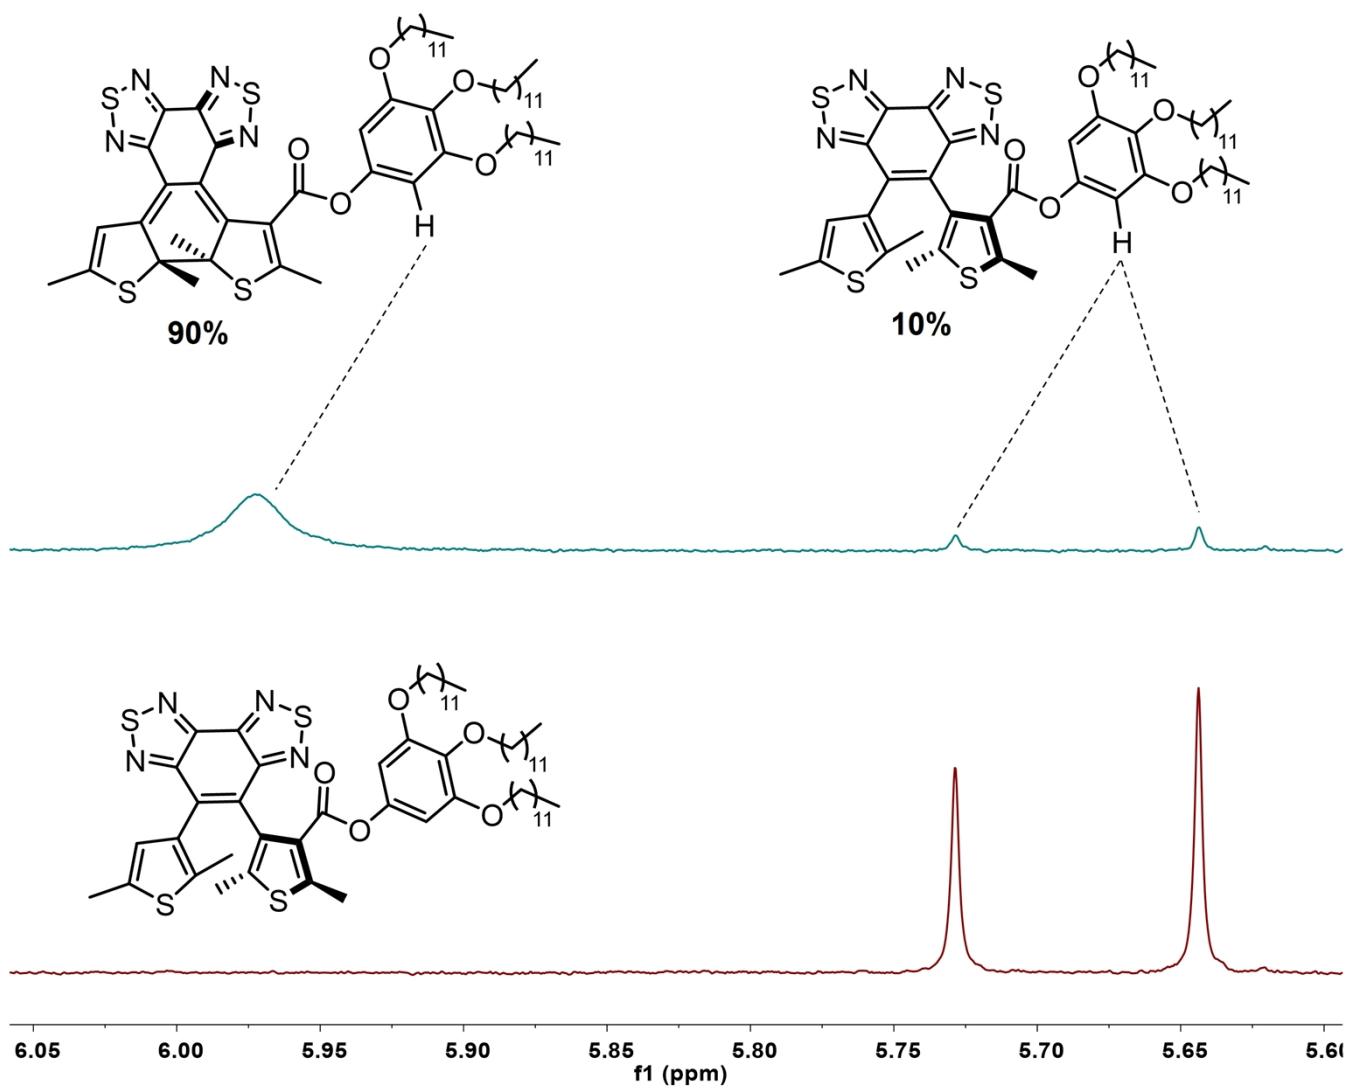

**Fig. S18.** Partial  $^1\text{H}$  NMR spectra changes of **10** at open state and PSS ( $c = 5 \times 10^{-3}$  M,  $\text{CD}_2\text{Cl}_2$ ).

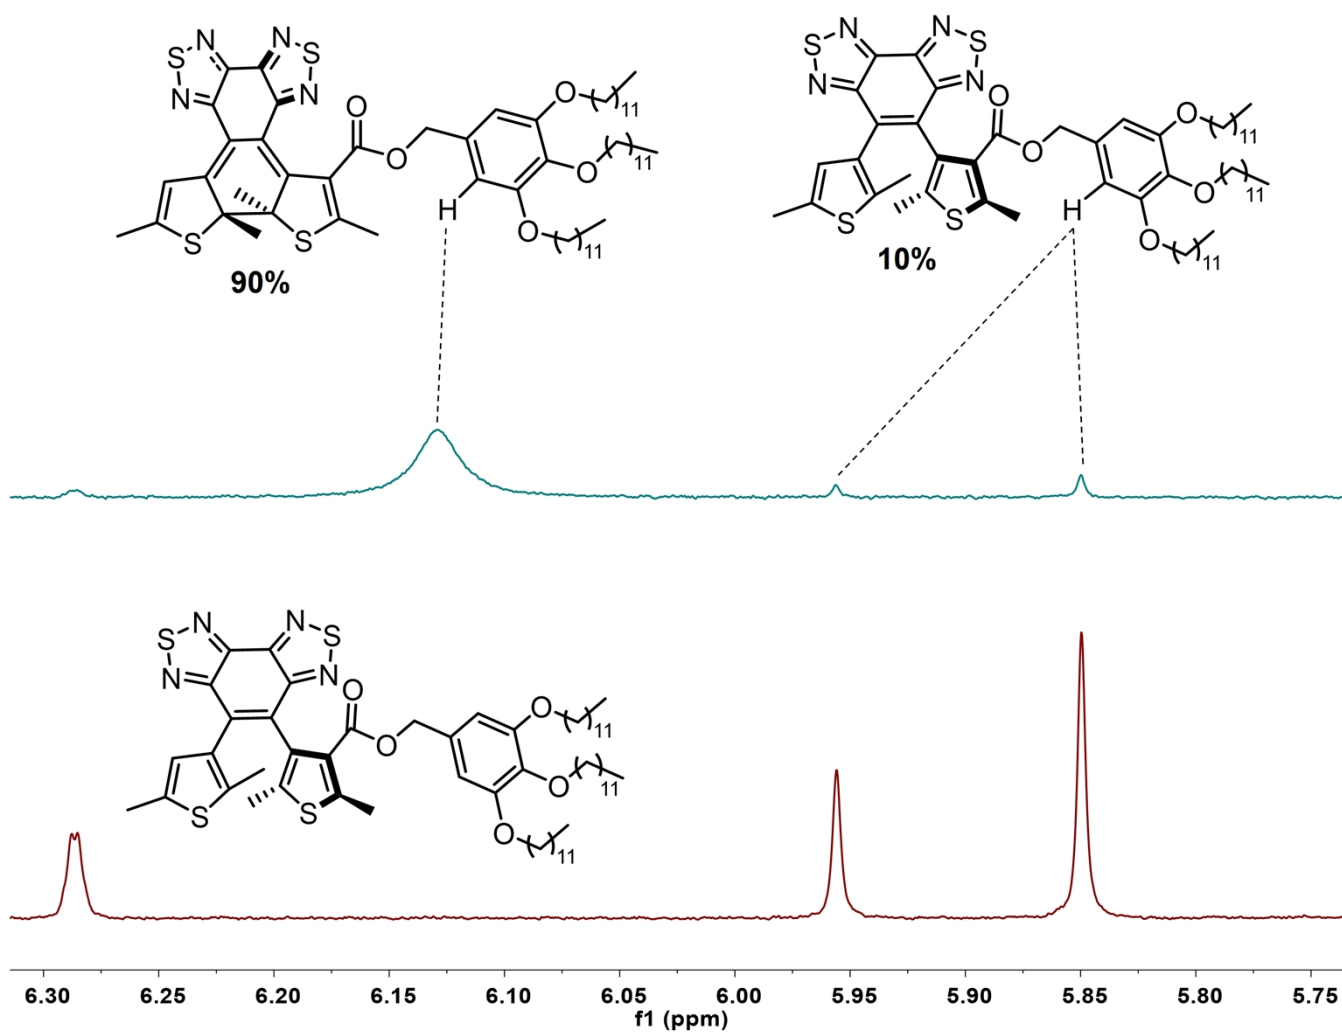

**Fig. S19.** Partial  $^1\text{H}$  NMR spectra changes of **11** at open state and PSS ( $c = 5 \times 10^{-3}$  M,  $\text{CD}_2\text{Cl}_2$ ).

### 6.5 CD Spectra of **10** and **11**

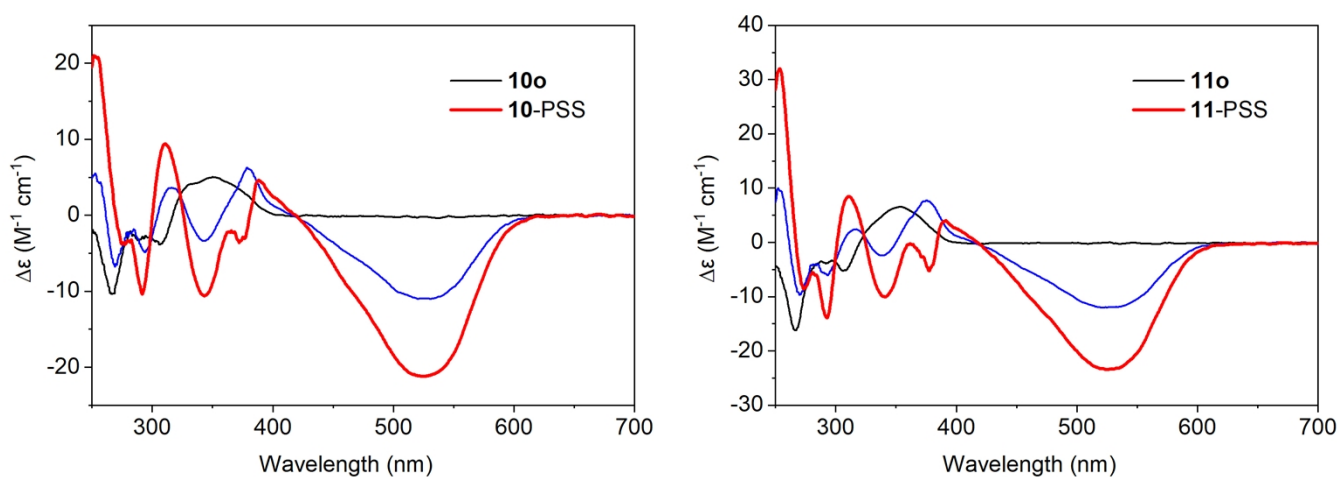

**Fig. S20.** CD spectra of **10**, **11** during irradiation with UV light ( $\lambda = 313$  nm) ( $c = 4 \times 10^{-5}$  M, THF).

## 6.6 Experiments of Photocyclization and Photocycloreversion Quantum Yields

Photocyclization quantum yield ( $\Phi_{o-c}$ ) and photocycloreversion quantum yield ( $\Phi_{c-o}$ ) were measured by monitoring the absorption changes at 517 nm during irradiation with UV light ( $\lambda = 313$  nm) ( $\Phi_{o-c}$ ) or visible light ( $\lambda = 517$  nm) ( $\Phi_{c-o}$ ) in THF according to standard procedure using BTF6 as reference<sup>S1</sup> whose  $\Phi_{o-c}$  and  $\Phi_{c-o}$  are both known as 0.35<sup>S2</sup>, respectively. At the beginning of irradiation,  $\Phi_{o-c}$  and  $\Phi_{c-o}$  should follow eq. S1 and eq. S2. See supporting information of reference S1 for the detailed derivation process of equations.

$$\Phi_{o-c} = \frac{k_{o-c}V}{l\varepsilon_1 I(1 - 10^{-\varepsilon_2 c_0})} \quad \text{eq. S1}$$

$$\Phi_{c-o} = \frac{|k_{c-o}|V}{l\varepsilon_1 I(1 - 10^{-\varepsilon_3 c})} \quad \text{eq. S2}$$

$c_o$  is the concentration of ring-open isomer.  $c$  is the concentration of ring-closed isomer.  $l$  is the optical path.  $V$  is the volume of the test solution.  $I$  is the intensity of incident light calculated from the known data of BTF6.  $\varepsilon_1$  is the extinction coefficient of ring-closed isomer at the detection wavelength (that is, 517 nm).  $\varepsilon_2$  is the extinction coefficient of ring-open isomer at irradiation wavelength (that is, 313 nm).  $\varepsilon_3$  is the extinction coefficient of ring-closed isomer at irradiation wavelength (that is, 517 nm).

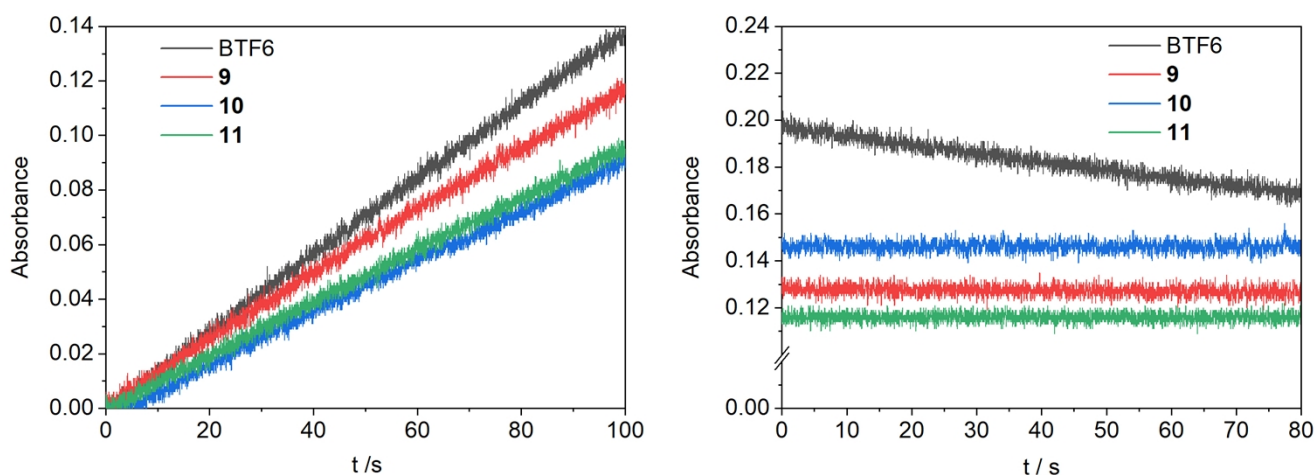

**Figure S21.** Absorption changes of **BTF6**, **9**, **10**, **11** during irradiation with UV light ( $\lambda = 313$  nm) and visible light ( $\lambda > 490$  nm) ( $c = 2 \times 10^{-4}$  M, THF).

**Table S4.** Photochromic data of **9**, **10** and **11**.

| Molecular  | $\varepsilon_{\max}^a$ | CR <sup>b</sup> | $\Phi_{o-c}^c$ | $\Phi_{c-o}^d$ |
|------------|------------------------|-----------------|----------------|----------------|
| <b>9</b>   | 37758                  | 0.90            | 0.37           | -              |
| <b>9c</b>  | 5511                   | >0.99           | -              | 0.042          |
| <b>10</b>  | 46430                  | 0.90            | 0.29           | -              |
| <b>10c</b> | 5626                   | >0.99           | -              | 0.0058         |
| <b>11</b>  | 37620                  | 0.90            | 0.32           | -              |
| <b>11c</b> | 5052                   | >0.99           | -              | 0.0023         |

<sup>a</sup>Typical absorption maxima  $\varepsilon_{\max}$  of ring-open isomer in the UV region and ring-closed isomer in the visible region,

respectively. <sup>b</sup>Calculated from <sup>1</sup>H NMR in CD<sub>2</sub>Cl<sub>2</sub>. <sup>c</sup>Quantum yields of photocyclization ( $\Phi_{o-c}$ ) at 313 nm and cycloreversion ( $\Phi_{c-o}$ ) at 517 nm.

## 7. Measurements of the HTPs of 9, 10, 11

The HTPs of **9**, **10**, **11** were calculated using the Grandjean-Cano wedge technique<sup>S5</sup> according to the equation:  $\beta_M = (Pc)^{-1}$ , where  $\beta_M$  is HTP,  $P$  is the pitch length of the helical structure, and  $c$  is the concentration of dopants.  $P$  was determined using a Cano wedge cell.  $P$  satisfies the following formula:  $P = 2L \tan \theta$ , where  $L$  is the distance between two disclination lines and  $\theta$  is the wedge angle.  $L$  was observed under the polarizing optical microscope before and after irradiation at 365 nm light. **9**, **10**, **11** were mixed with TEB300, heated to melt, and subsequently injected into a wedge cell respectively for HTP measurements.

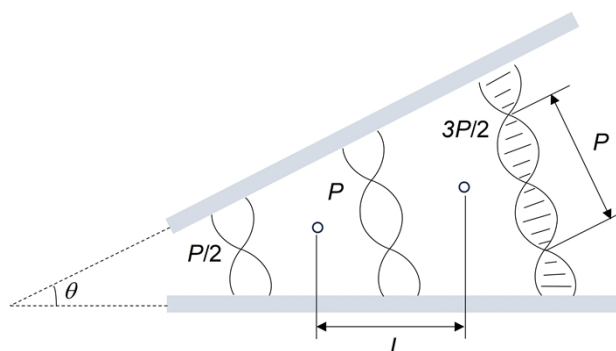

Fig. S22. Scheme of the Grandjean-Cano wedge technique.

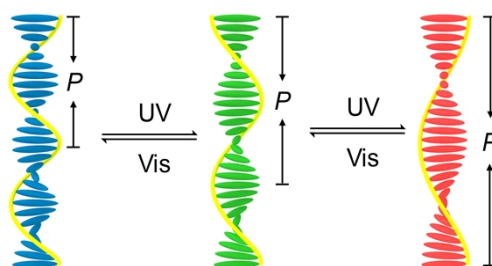

Fig. S23. Schematic illustration of pitch length modulation.

Table S5. Data for calculation of the HTPs of **9**, **10** and **11**.

| Dopant           | $\tan \theta$ | $L / \mu\text{m}$ | $P / \mu\text{m}$ | $c$ (mol%) | $\beta_M / \mu\text{m}^{-1}$ |
|------------------|---------------|-------------------|-------------------|------------|------------------------------|
| <b>9</b>         | 0.0183        | 108.5             | 3.9711            | 0.36       | 69.8                         |
| <b>9</b> at PSS  | 0.0183        | 159.6             | 5.8413            | 0.36       | 47.4                         |
| <b>10</b>        | 0.0183        | 510.1             | 18.6697           | 0.12       | 44.5                         |
| <b>10</b> at PSS | 0.0183        | 408.0             | 14.9328           | 0.12       | 55.9                         |
| <b>11</b>        | 0.0183        | 438.9             | 16.0637           | 0.12       | 52.1                         |
| <b>11</b> at PSS | 0.0183        | 396.7             | 14.5192           | 0.12       | 57.5                         |

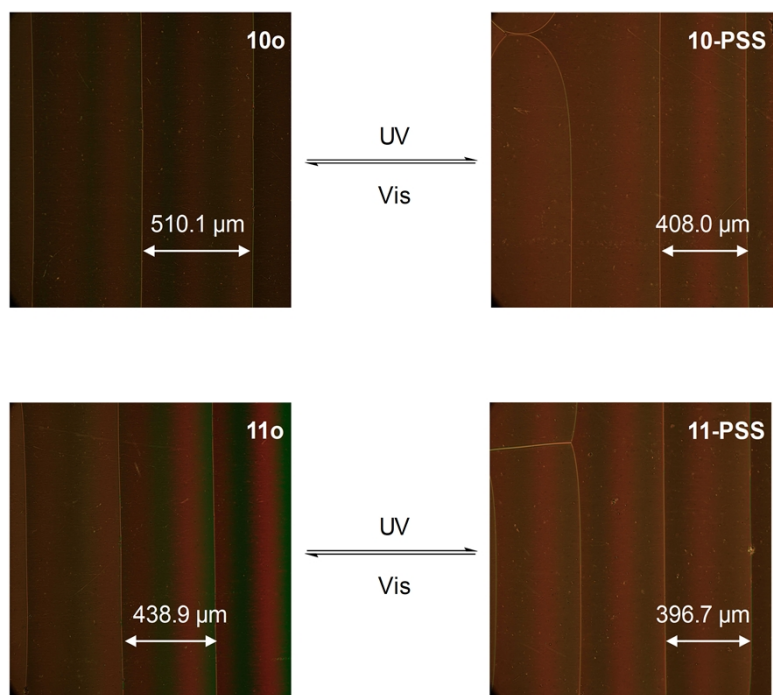

**Fig. S24.** Distance changes between two disclination lines changes of **10** or **11**.

## 8. NMR Spectra

2b,  $^1\text{H}$  NMR, 400 MHz,  $\text{CDCl}_3$

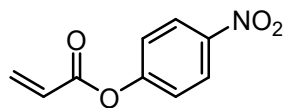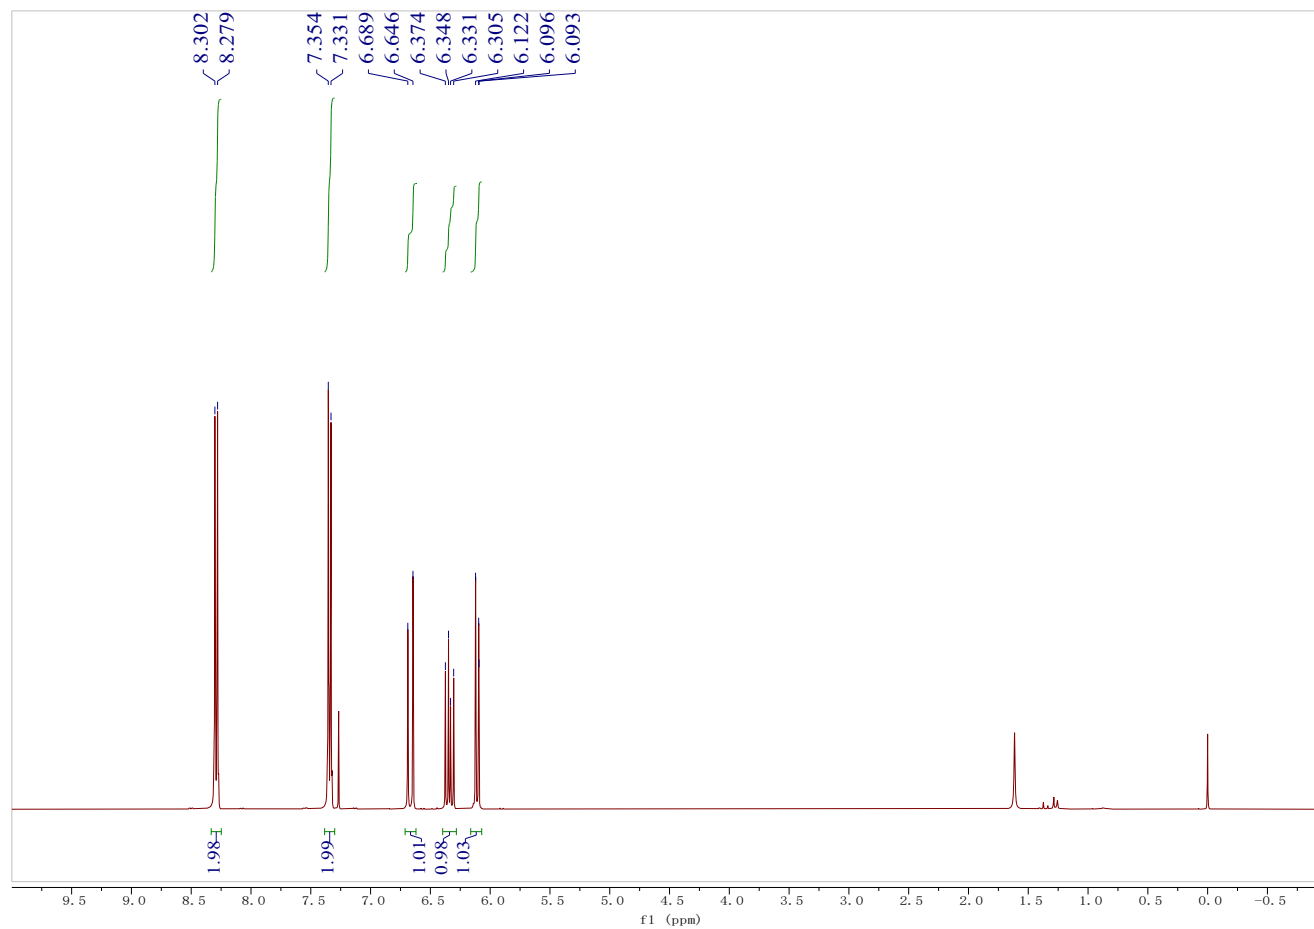



2b,  $^{13}\text{C}$  NMR, 101 MHz,  $\text{CDCl}_3$

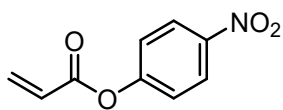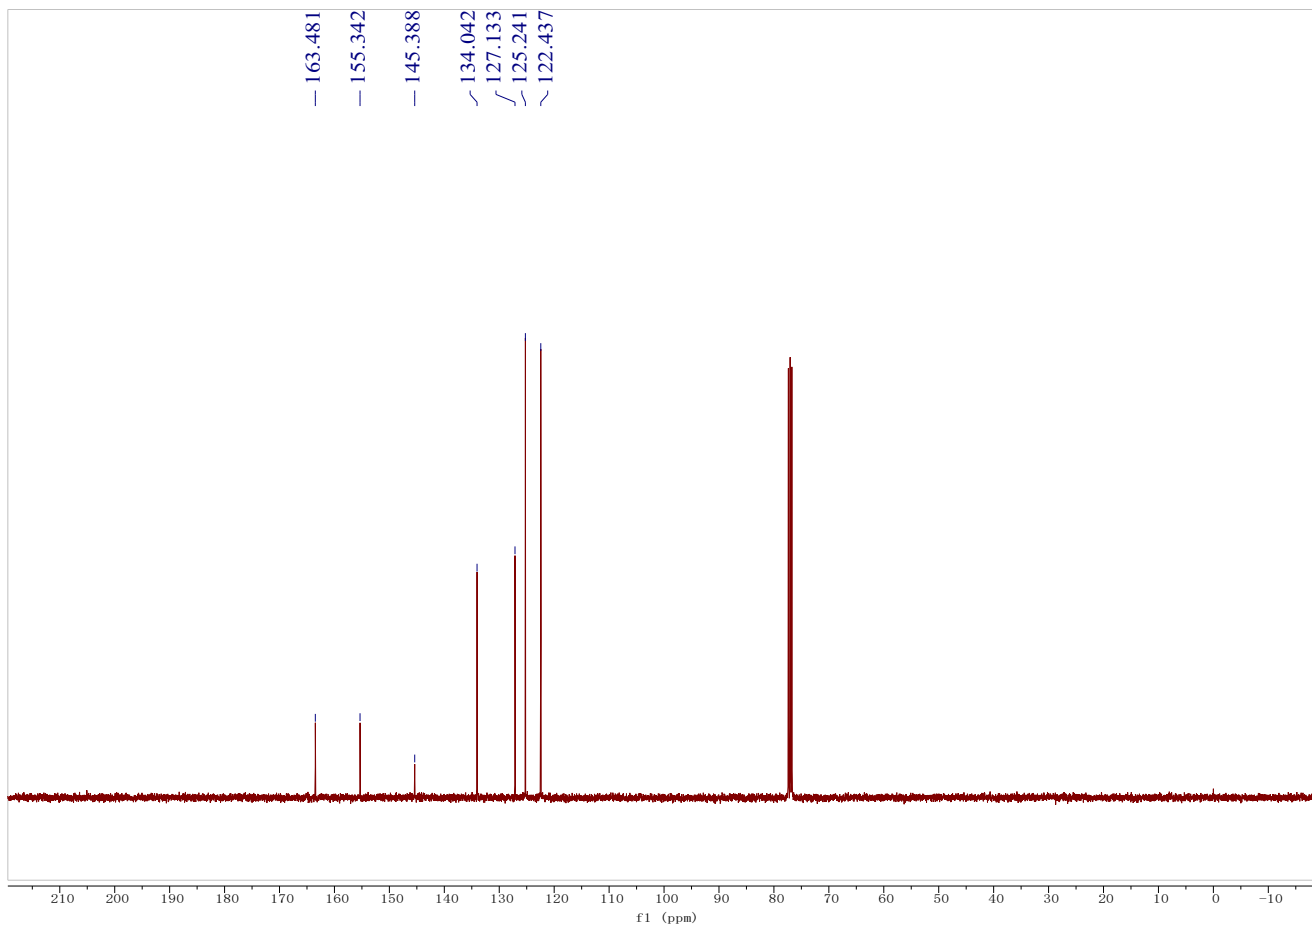

2c,  $^1\text{H}$  NMR, 400 MHz,  $\text{CDCl}_3$

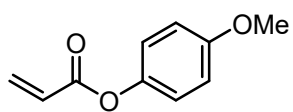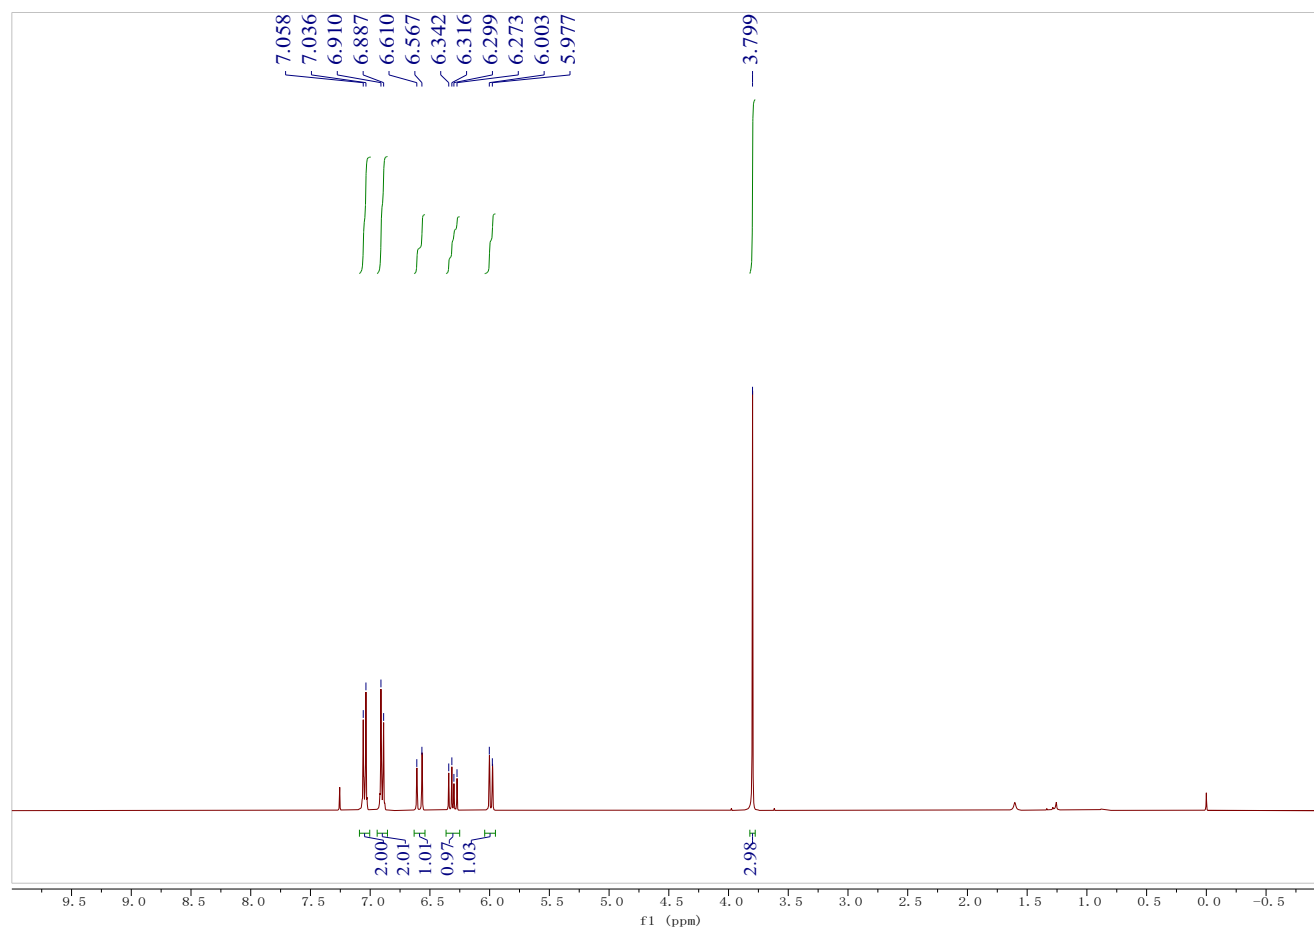

2c,  $^{13}\text{C}$  NMR, 101 MHz,  $\text{CDCl}_3$

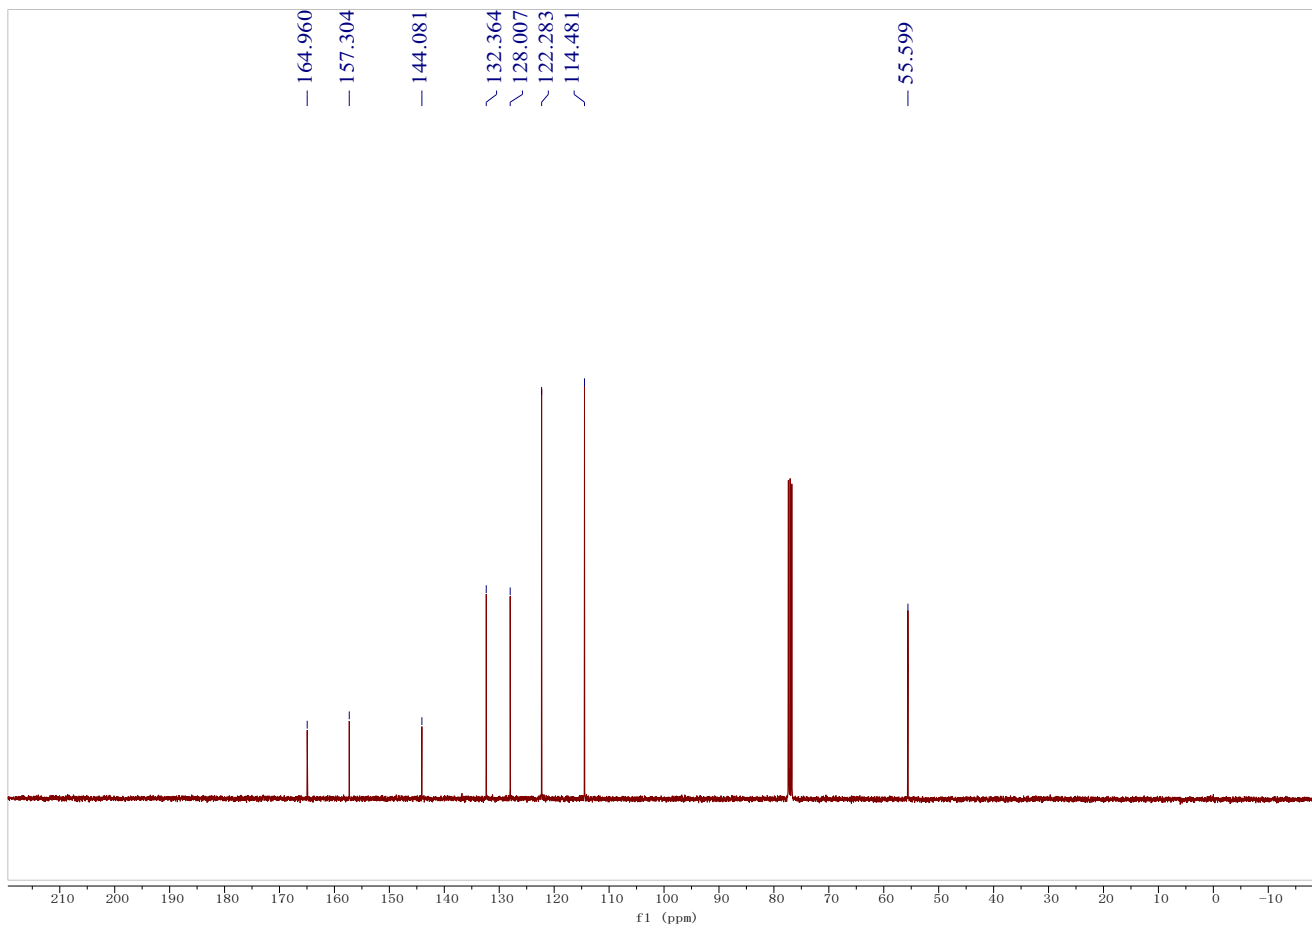

2d,  $^1\text{H}$  NMR, 400 MHz,  $\text{CDCl}_3$

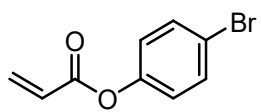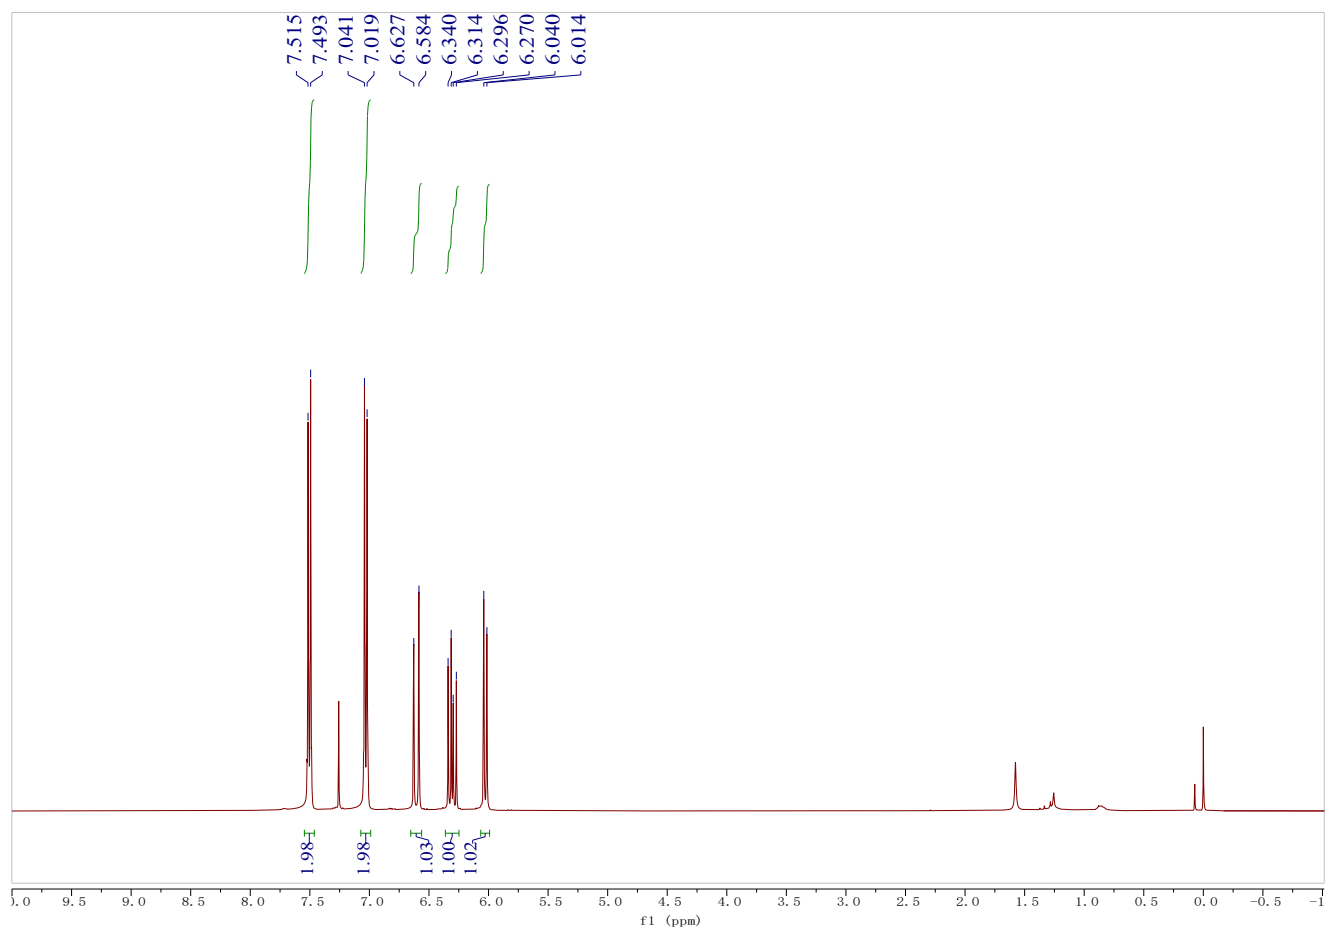

2d, <sup>13</sup>C NMR, 101 MHz, CDCl<sub>3</sub>

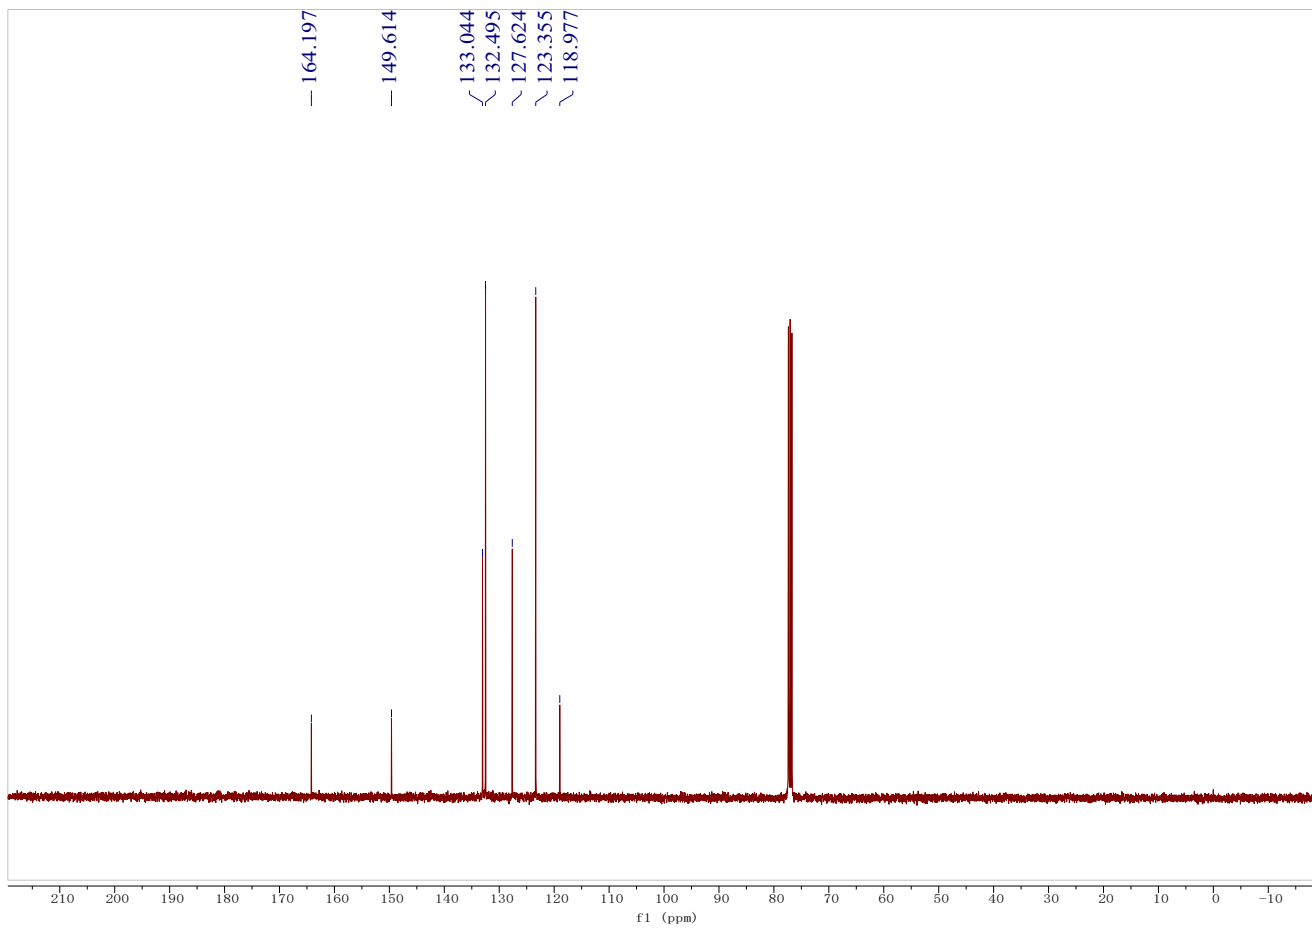

2e,  $^1\text{H}$  NMR, 400 MHz,  $\text{CDCl}_3$

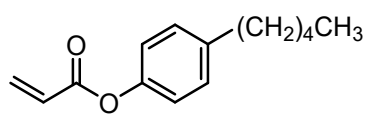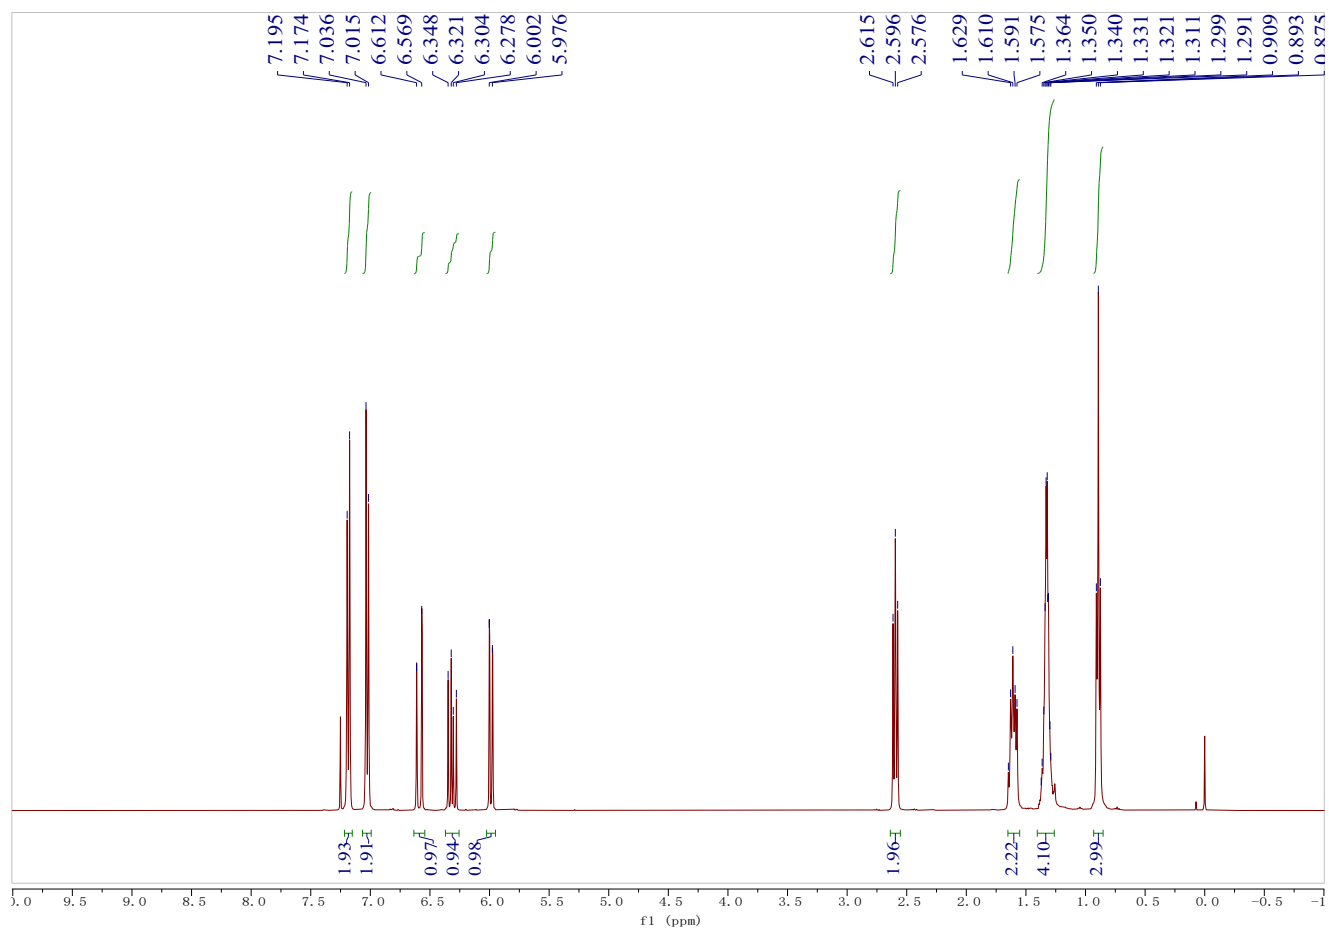

2e,  $^{13}\text{C}$  NMR, 101 MHz,  $\text{CDCl}_3$

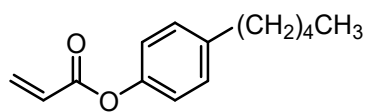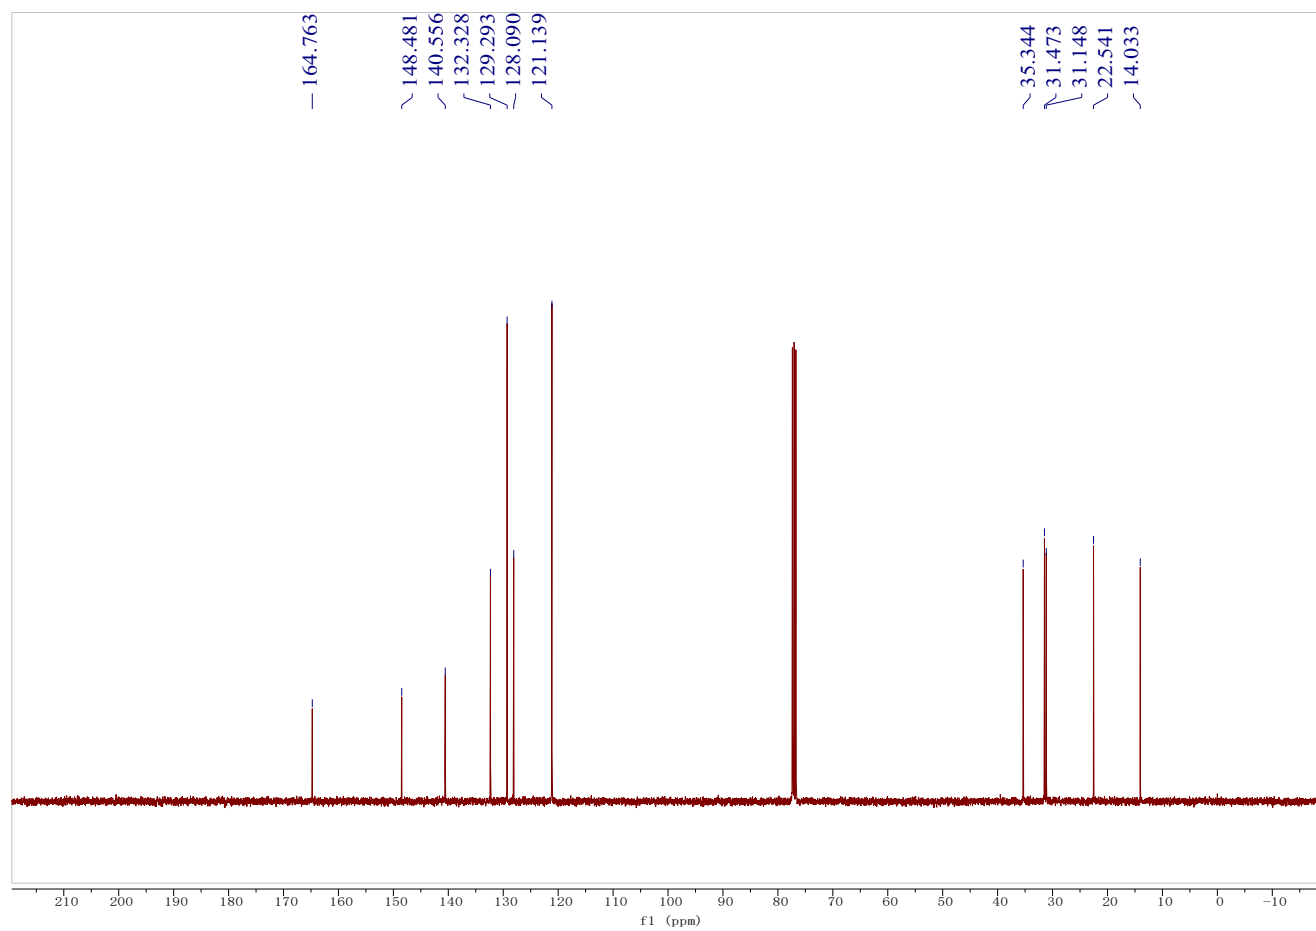

2f,  $^1\text{H}$  NMR, 400 MHz,  $\text{CDCl}_3$

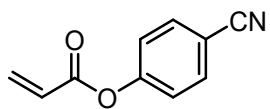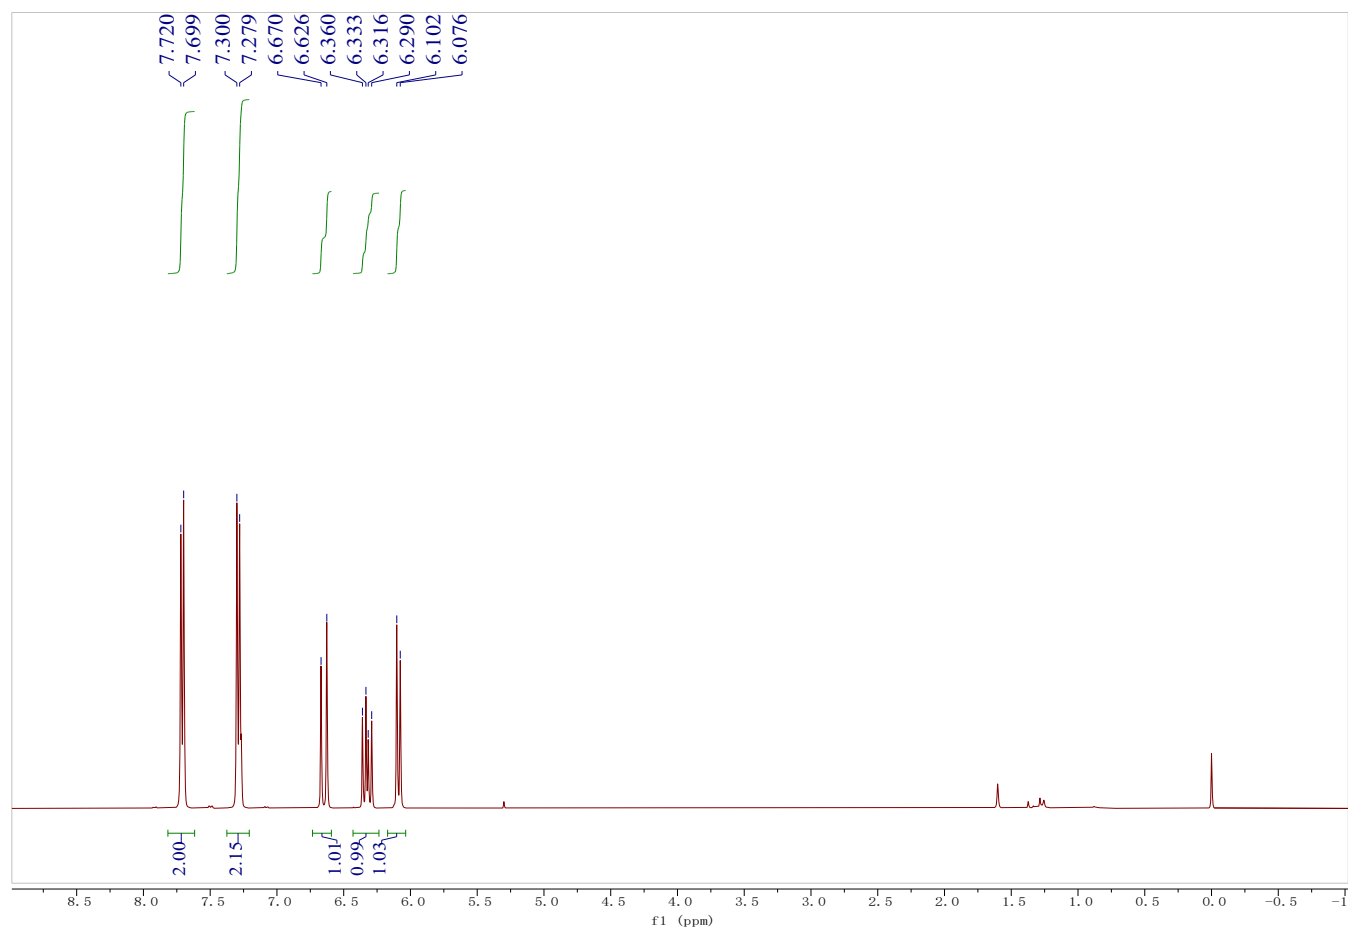



2f,  $^{13}\text{C}$  NMR, 101 MHz,  $\text{CDCl}_3$

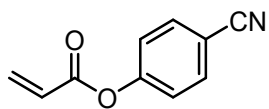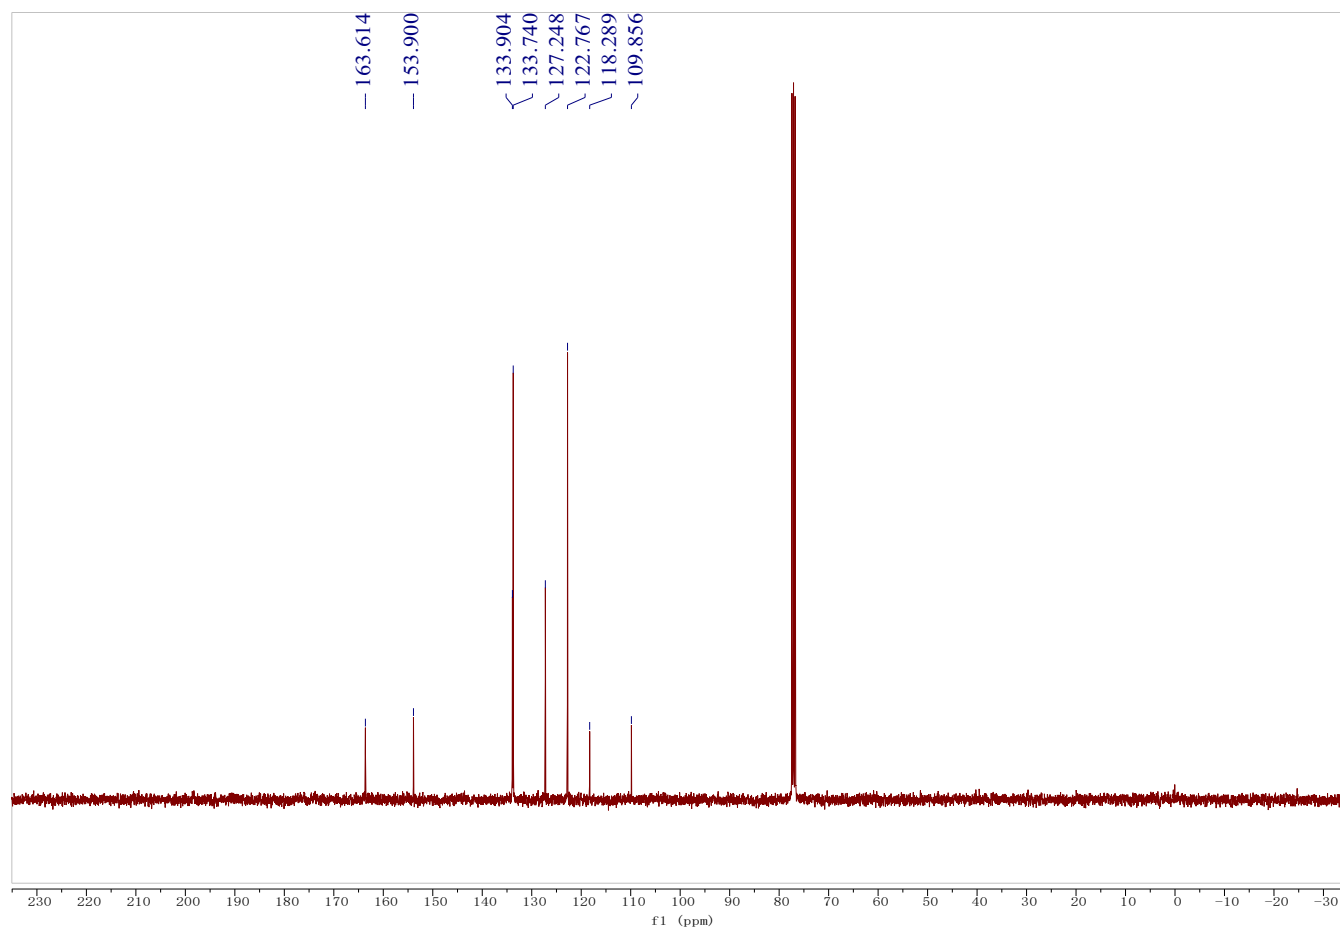

2g,  $^1\text{H}$  NMR, 400 MHz,  $\text{CDCl}_3$

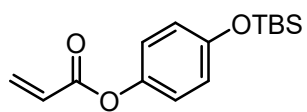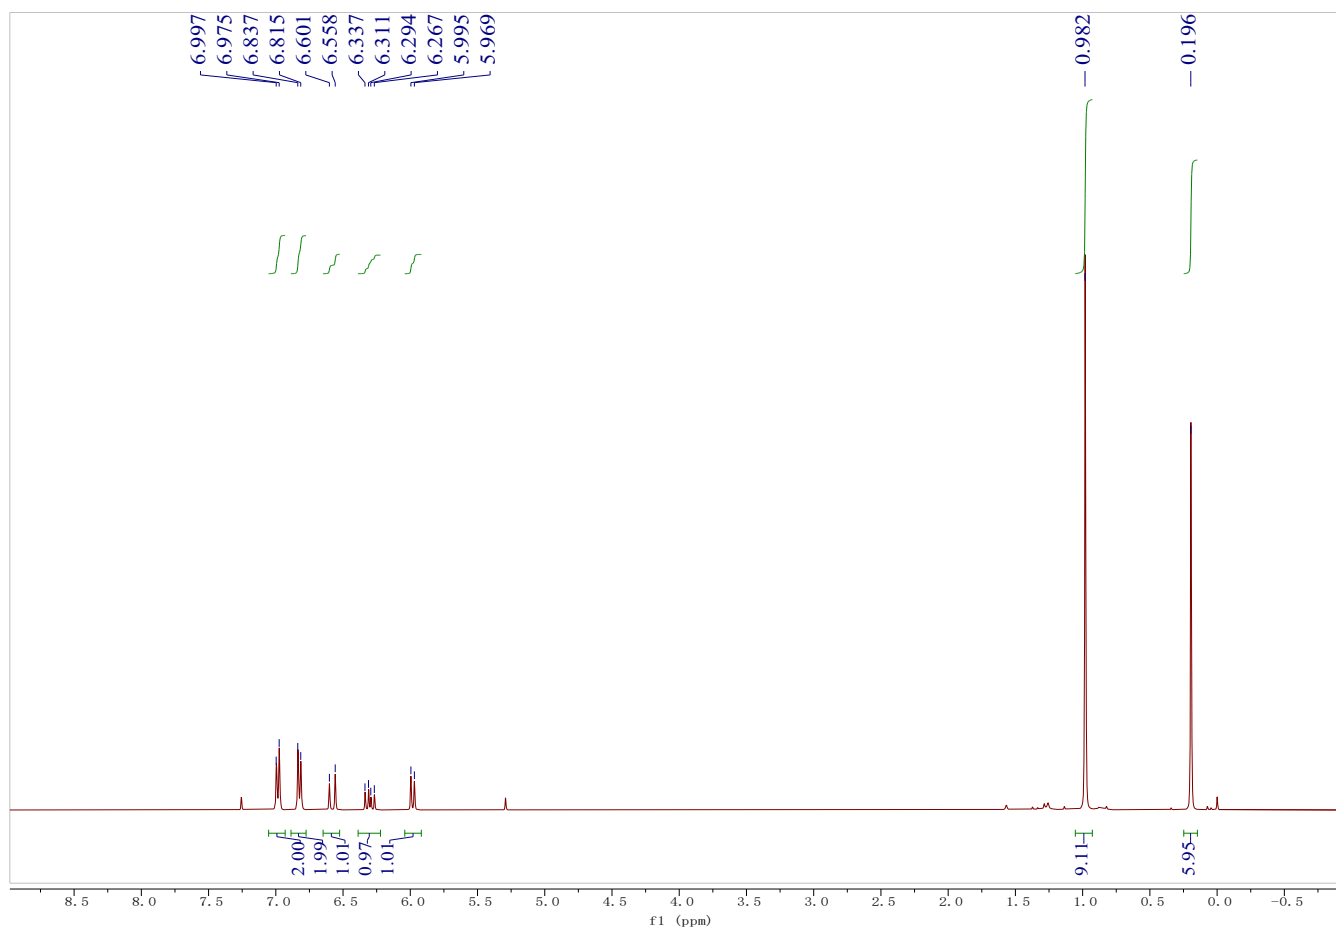

2g,  $^{13}\text{C}$  NMR, 101 MHz,  $\text{CDCl}_3$

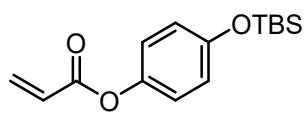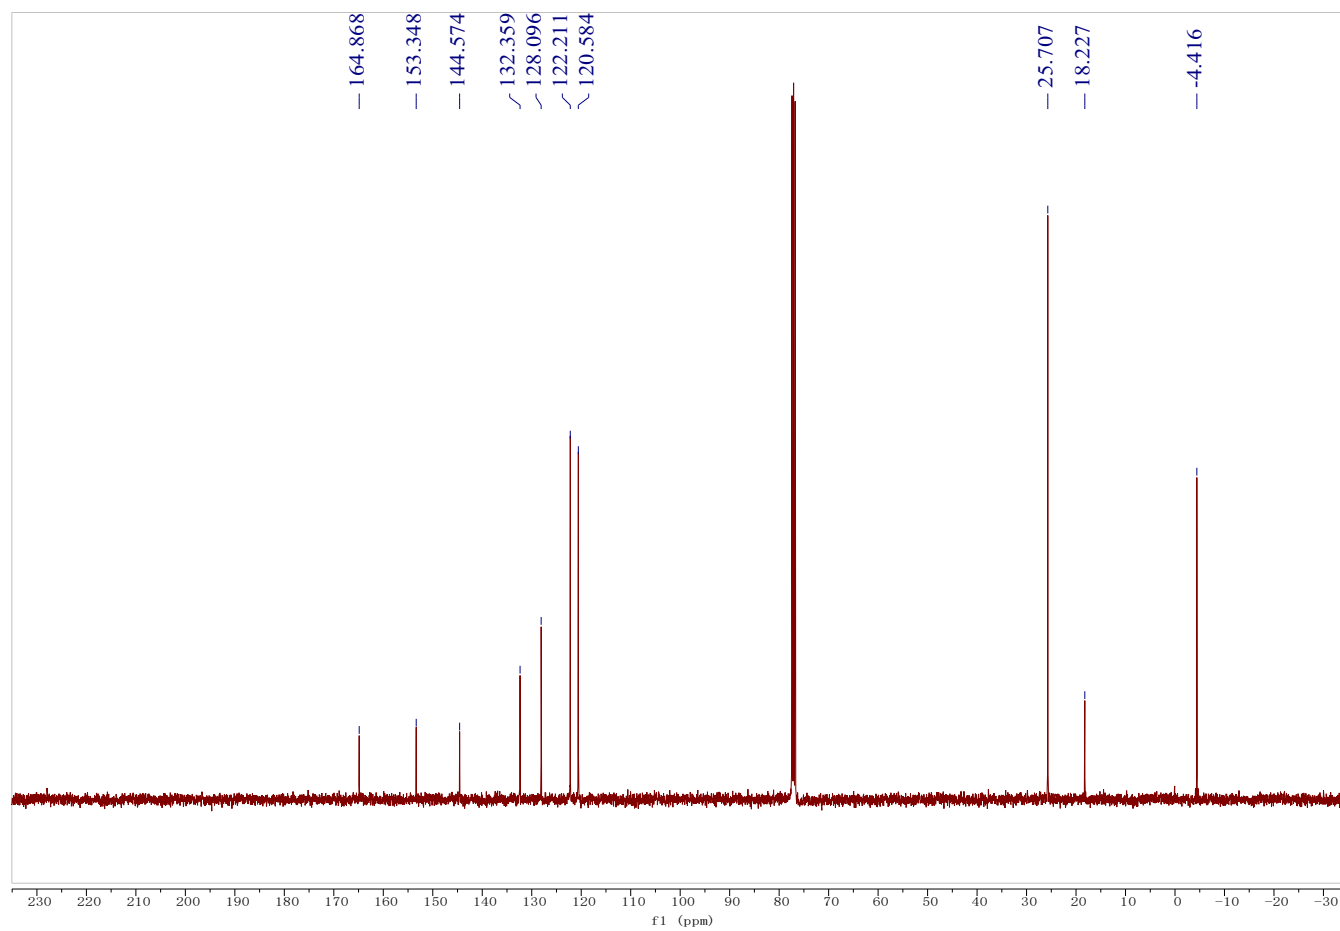

2h,  $^1\text{H}$  NMR, 400 MHz,  $\text{CDCl}_3$

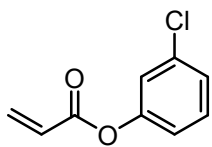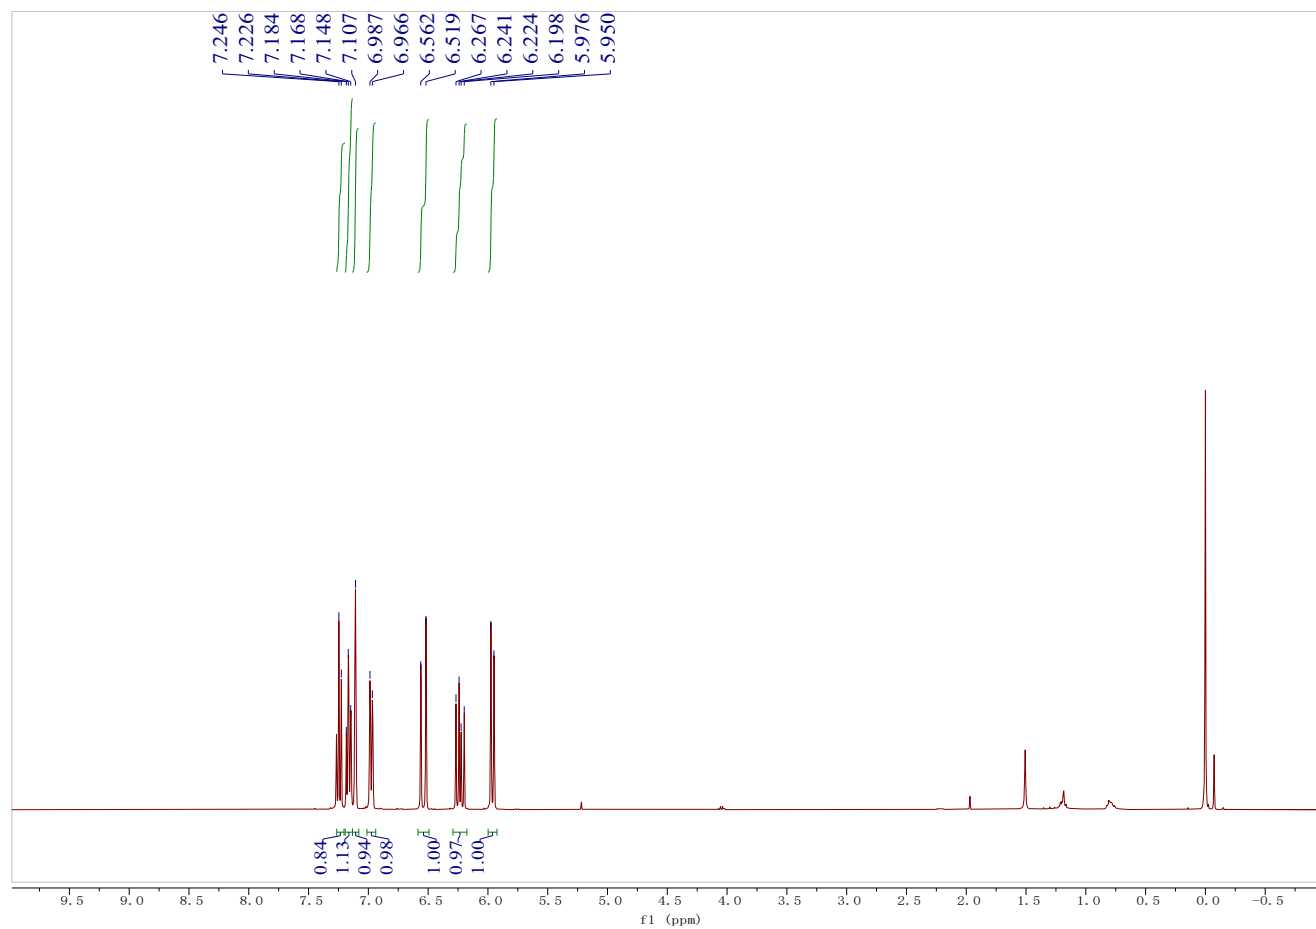

2h,  $^{13}\text{C}$  NMR, 101 MHz,  $\text{CDCl}_3$

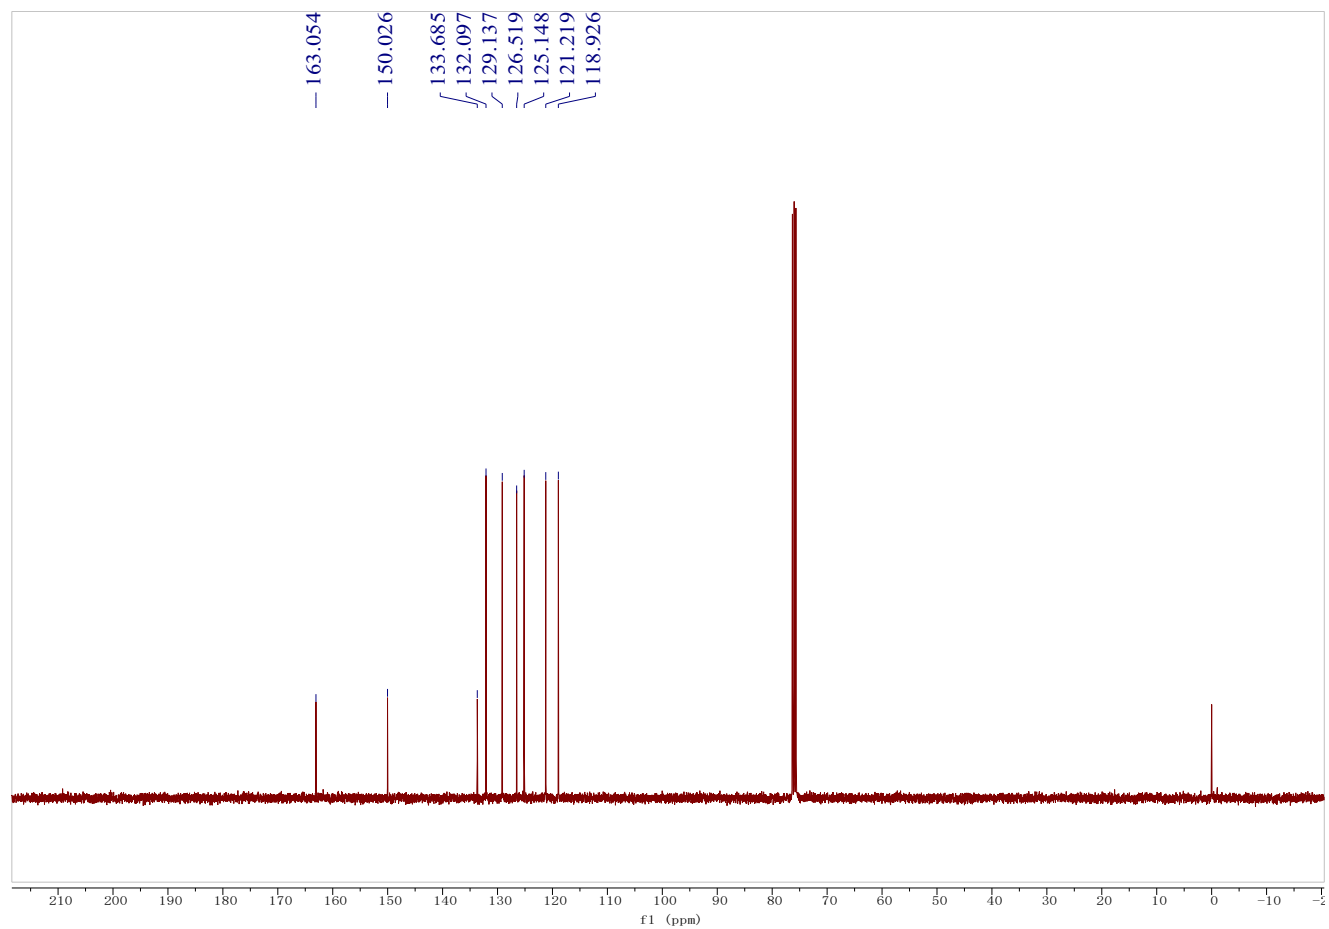

2i, <sup>1</sup>H NMR, 400 MHz, CDCl<sub>3</sub>

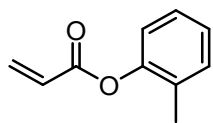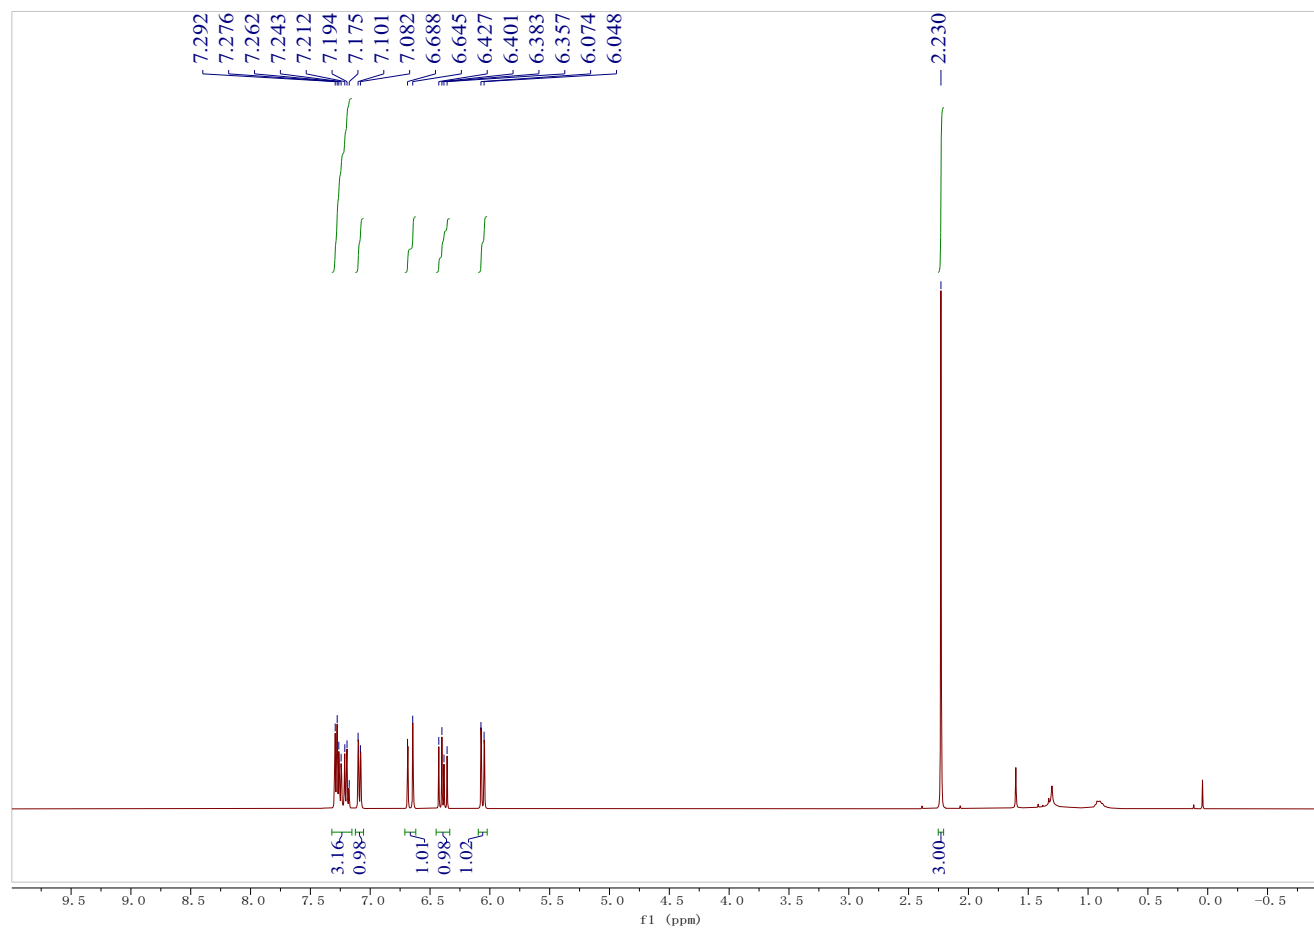

2i,  $^{13}\text{C}$  NMR, 101 MHz,  $\text{CDCl}_3$

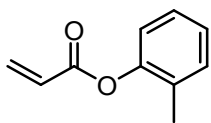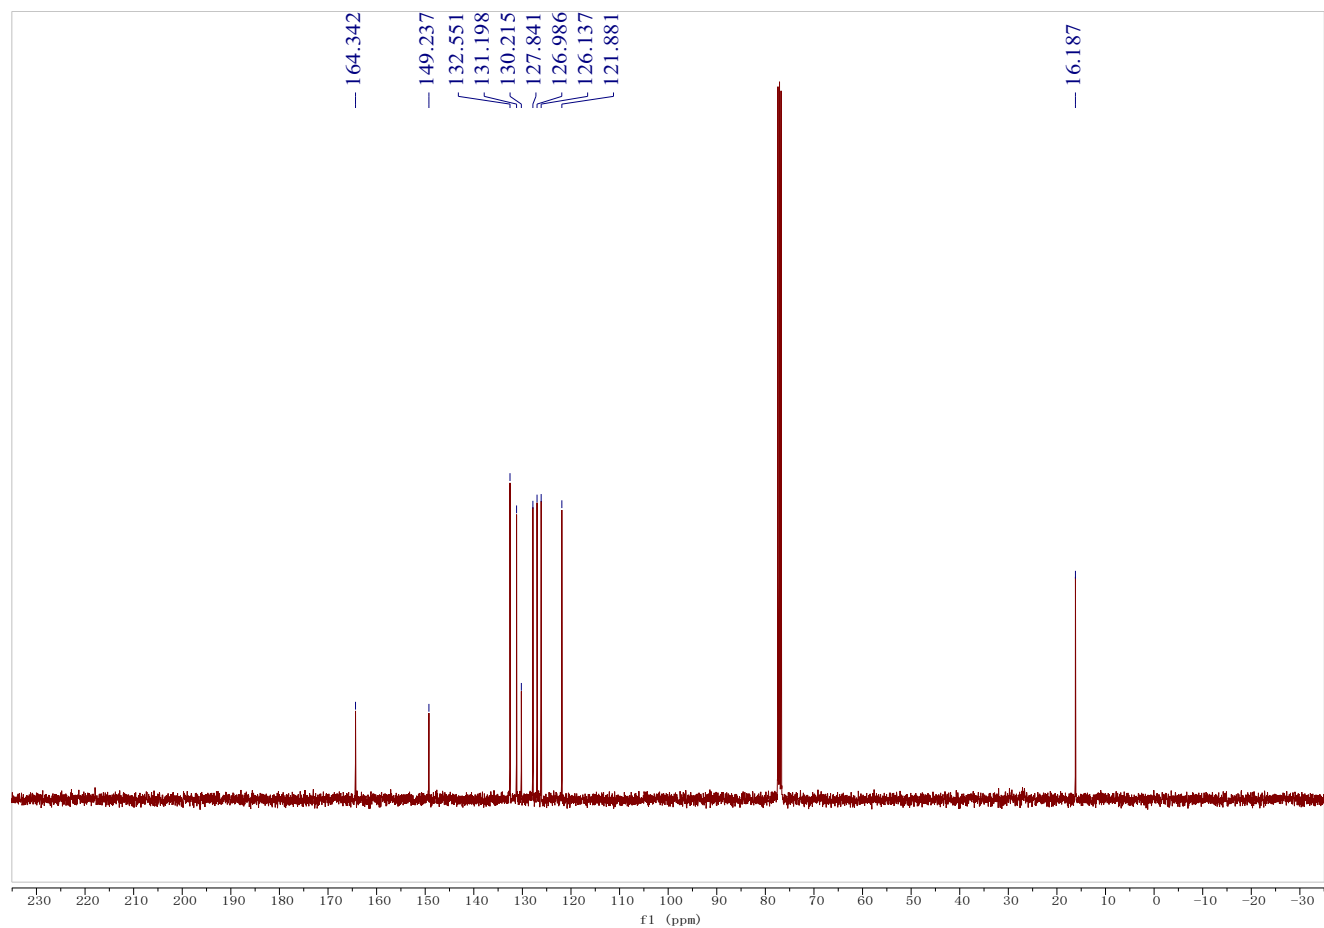

2j, <sup>1</sup>H NMR, 400 MHz, CDCl<sub>3</sub>

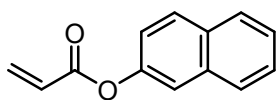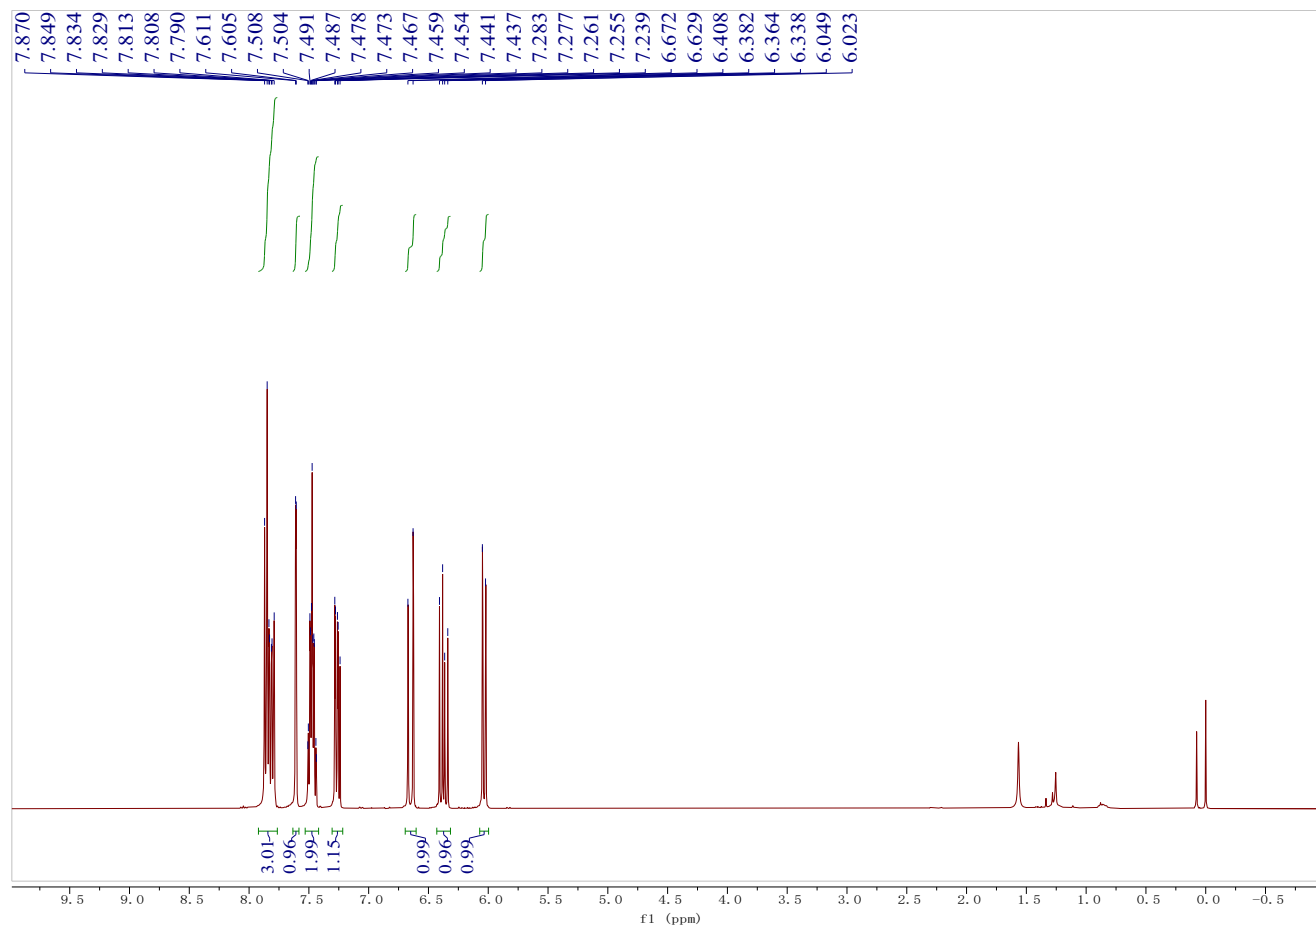



2j,  $^{13}\text{C}$  NMR, 101 MHz,  $\text{CDCl}_3$

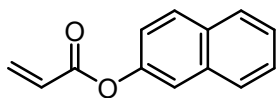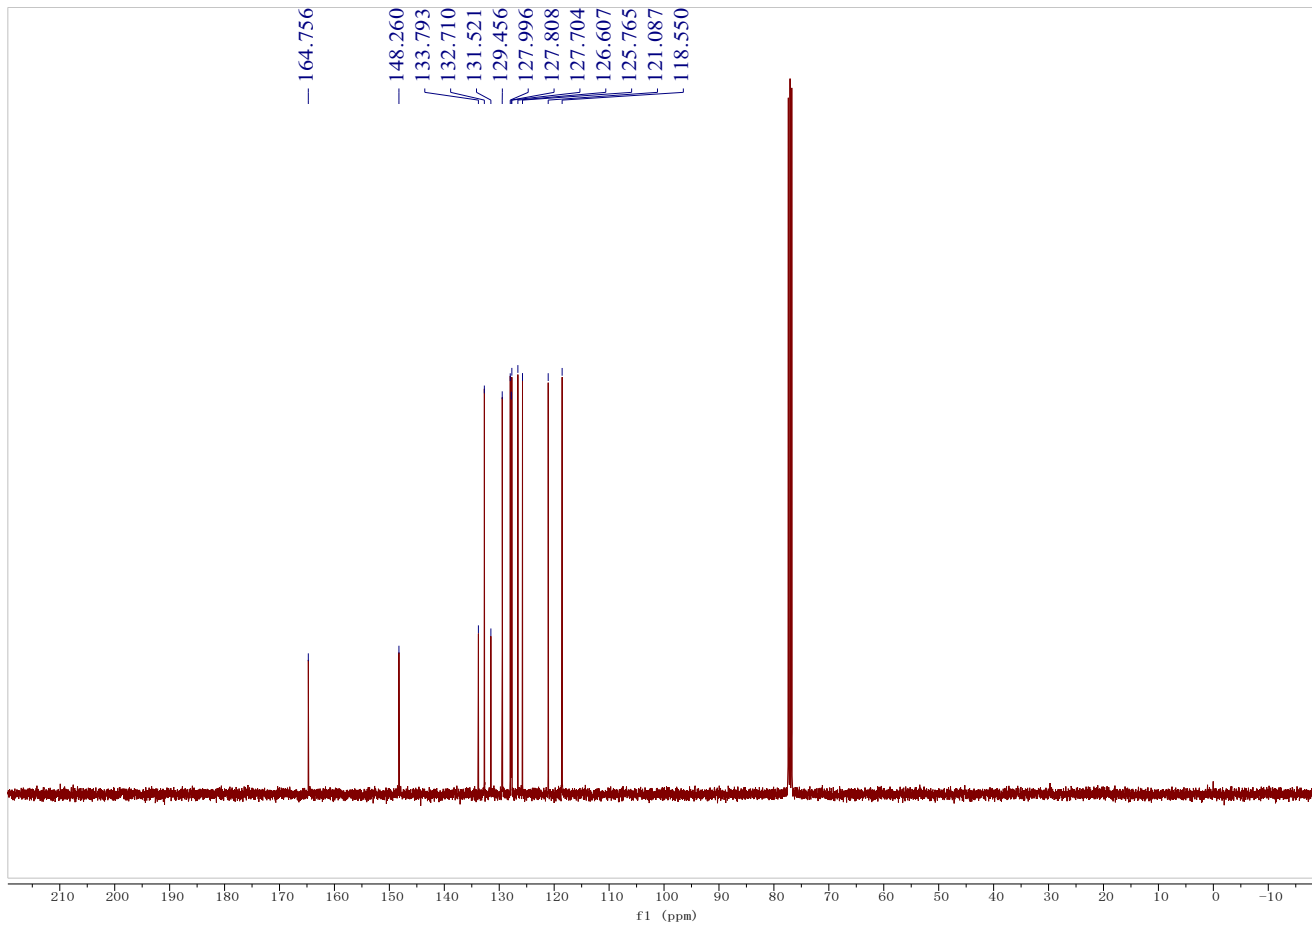

2z, <sup>1</sup>H NMR, 400 MHz, CDCl<sub>3</sub>

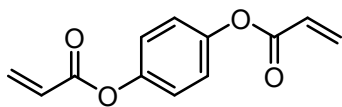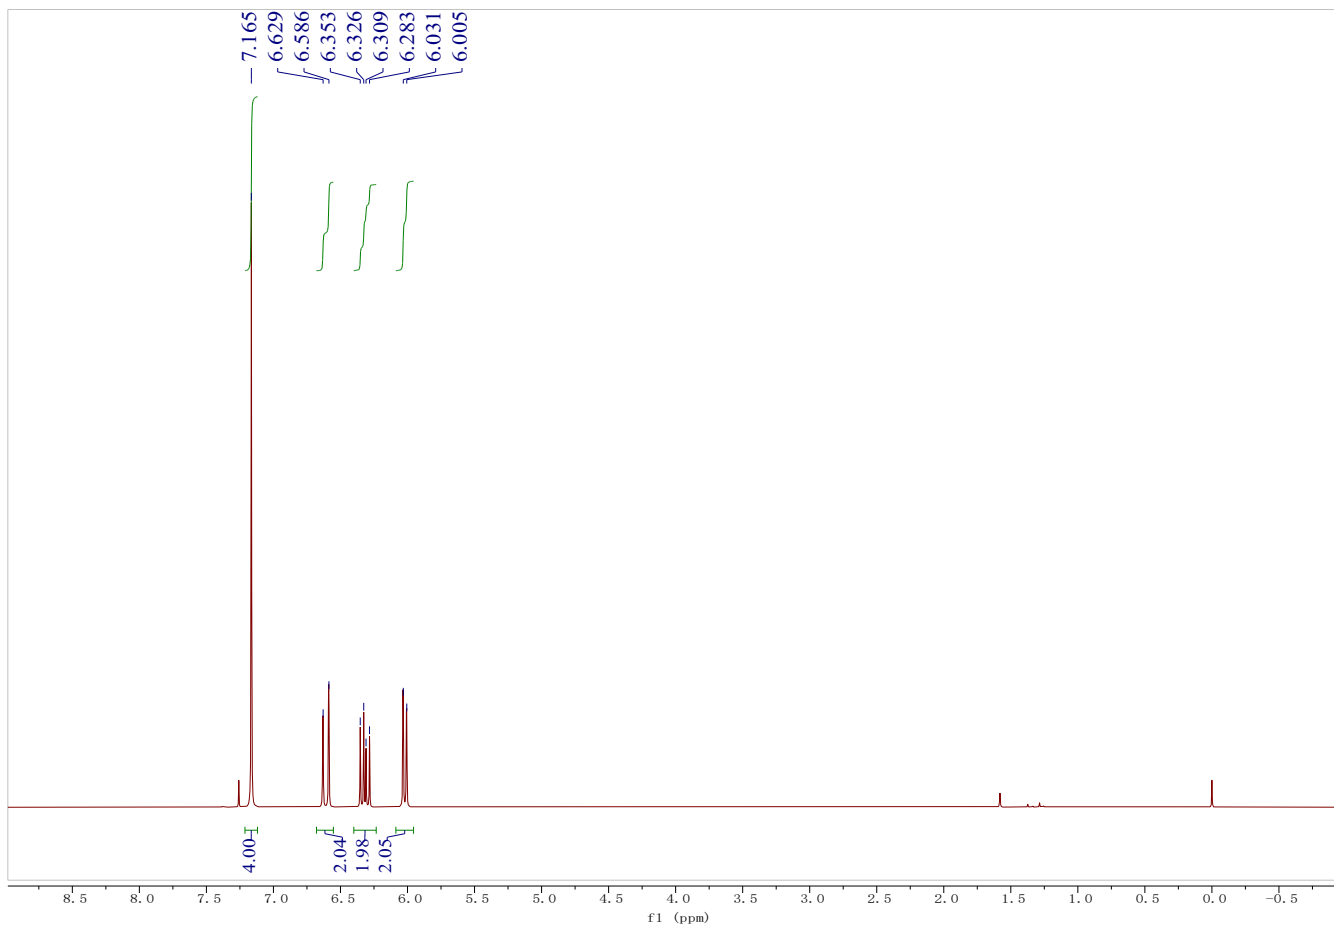

2z,  $^{13}\text{C}$  NMR, 101 MHz,  $\text{CDCl}_3$

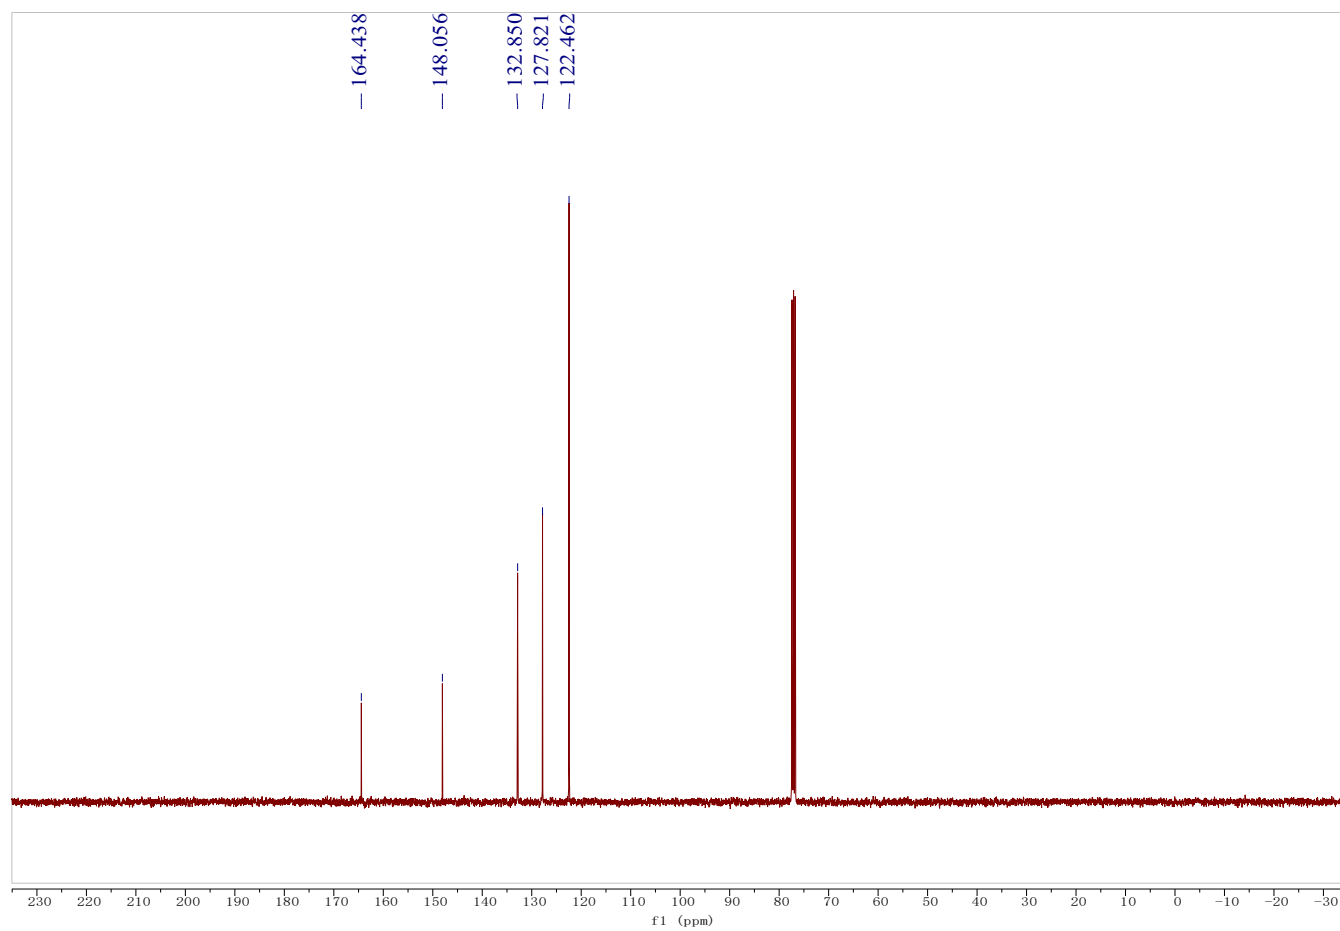

2aa, <sup>1</sup>H NMR, 400 MHz, CDCl<sub>3</sub>

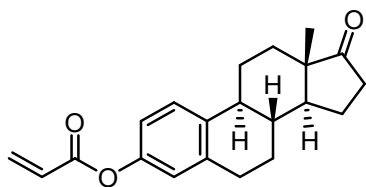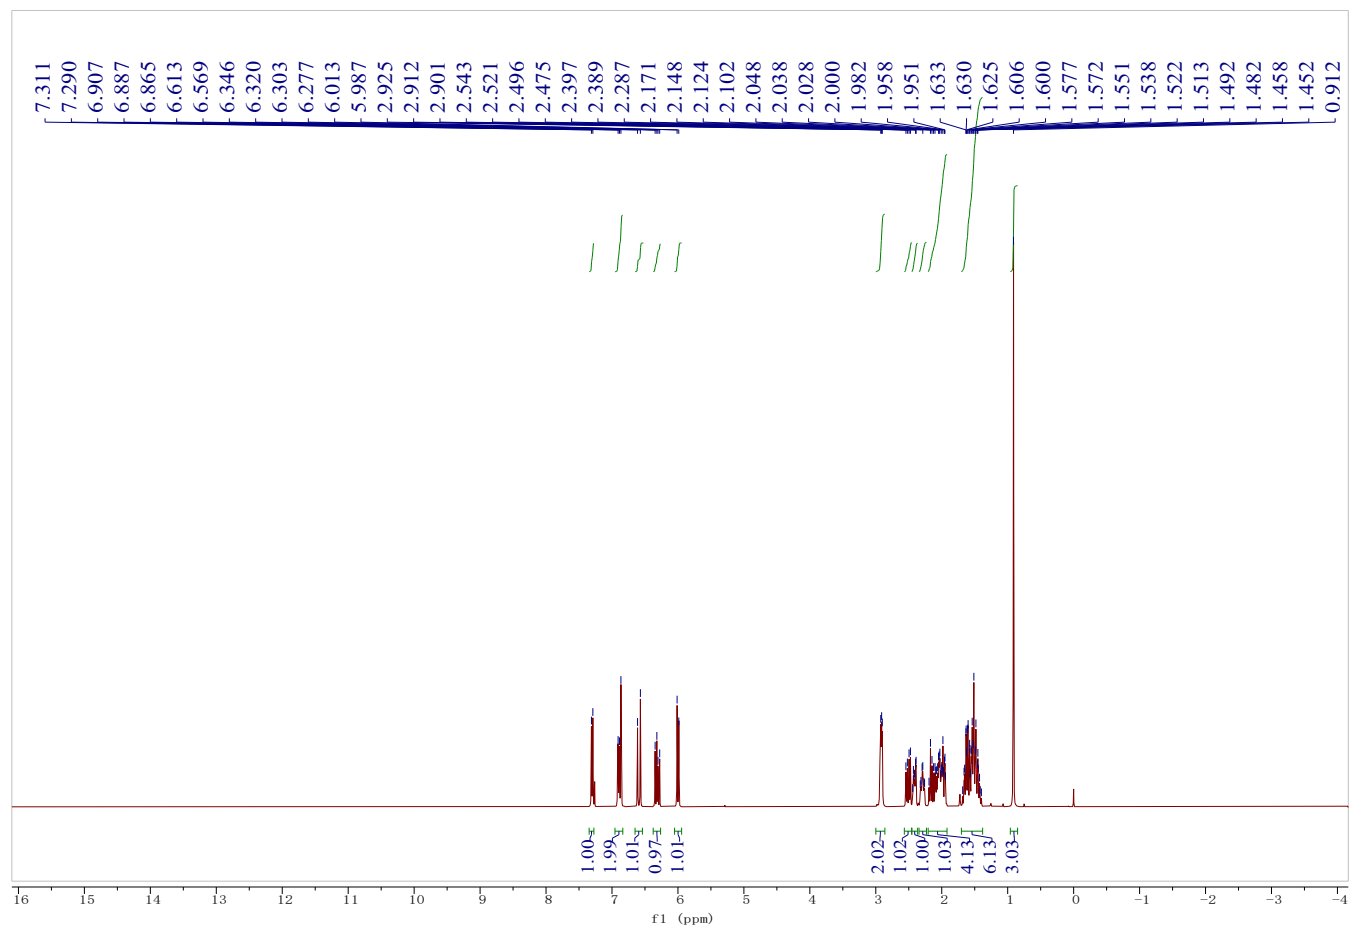

2aa,  $^{13}\text{C}$  NMR, 101 MHz,  $\text{CDCl}_3$

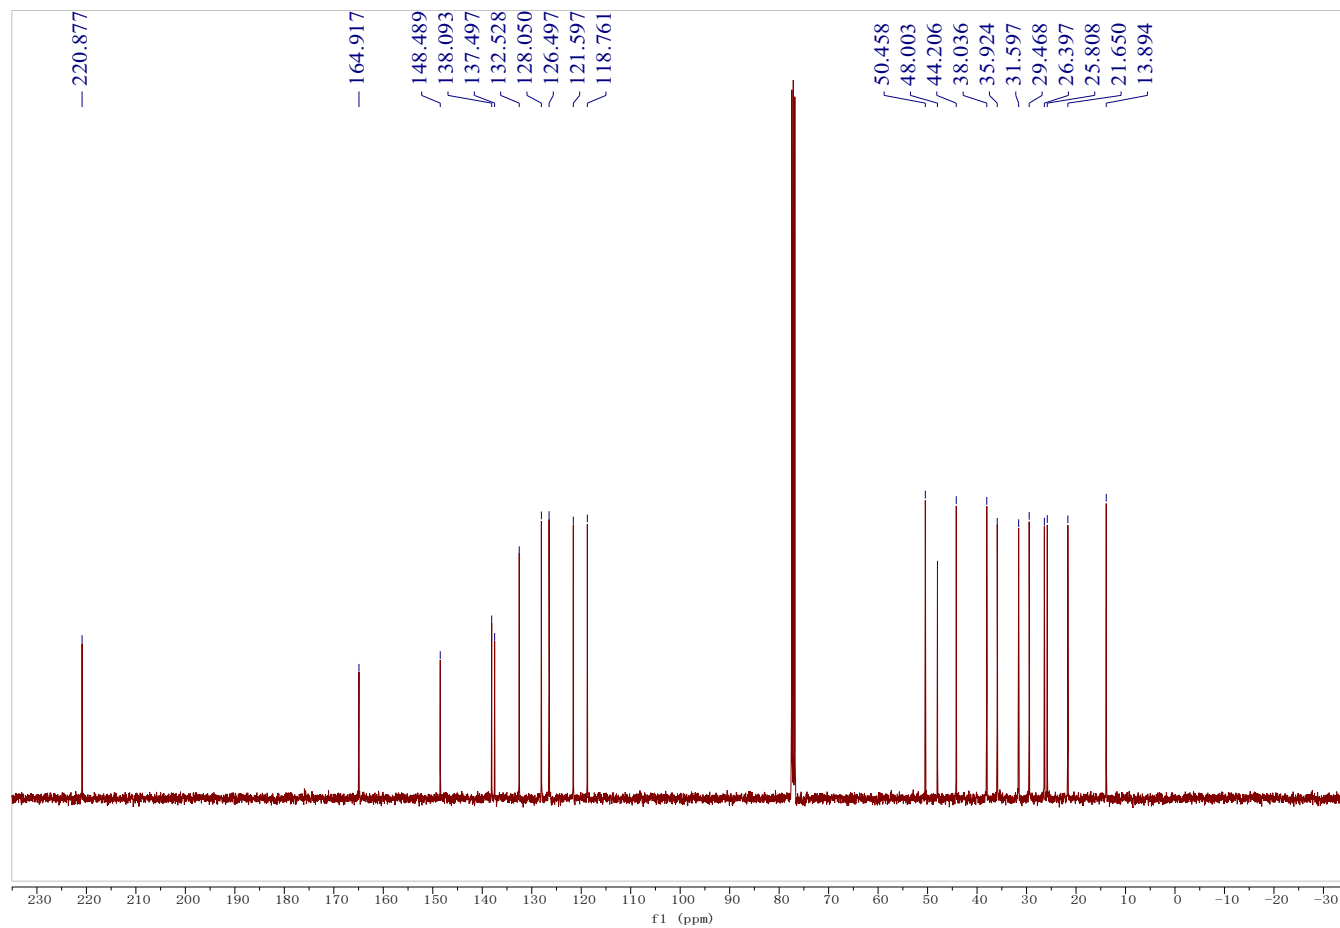

2ab, <sup>1</sup>H NMR, 400 MHz, CDCl<sub>3</sub>

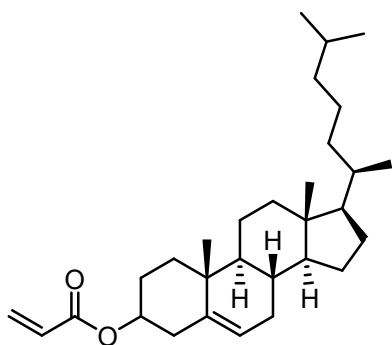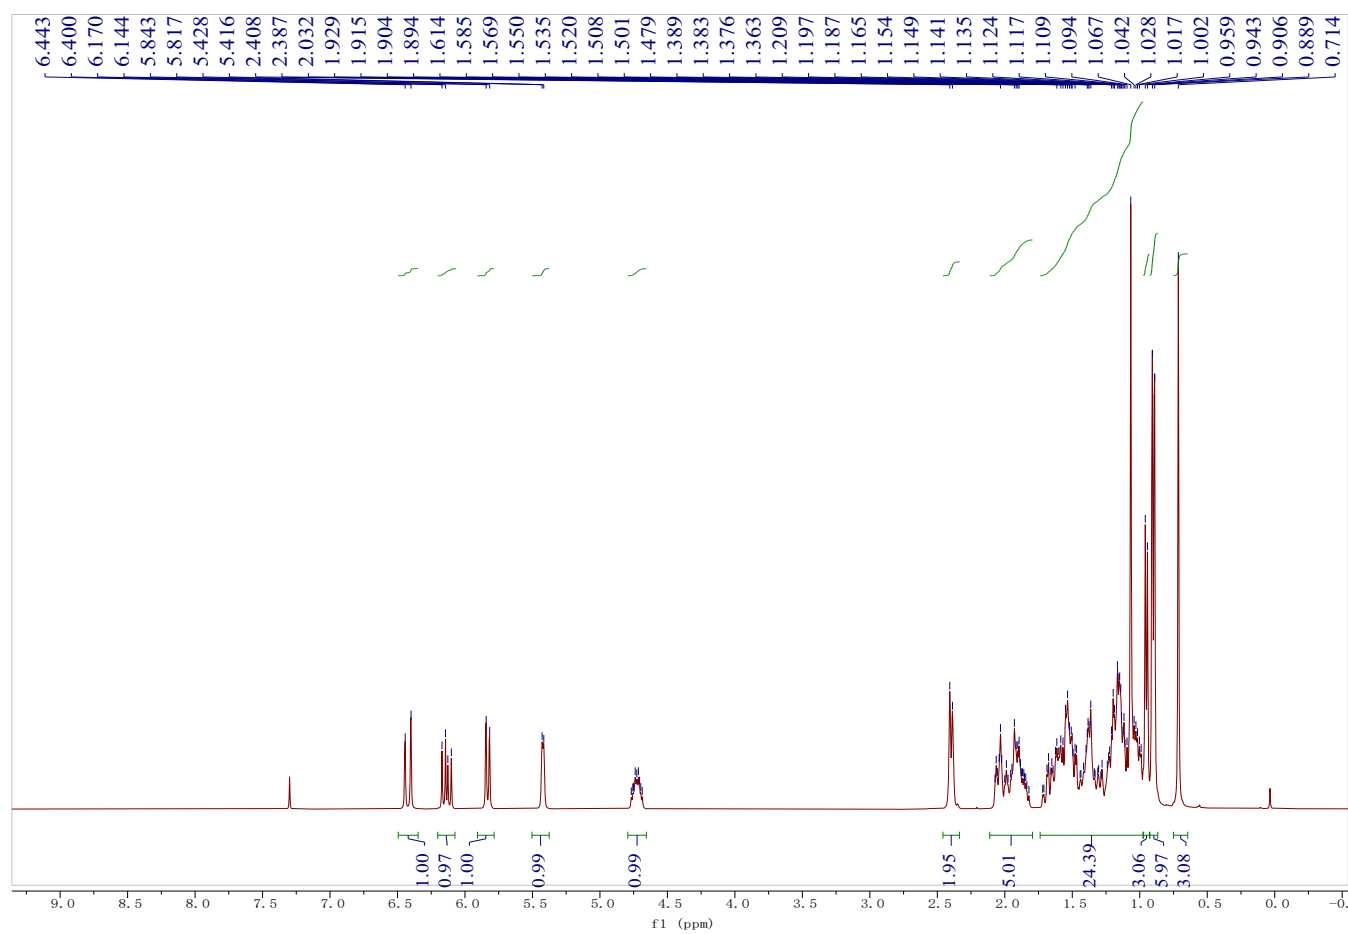

2ab, <sup>13</sup>C NMR, 101 MHz, CDCl<sub>3</sub>

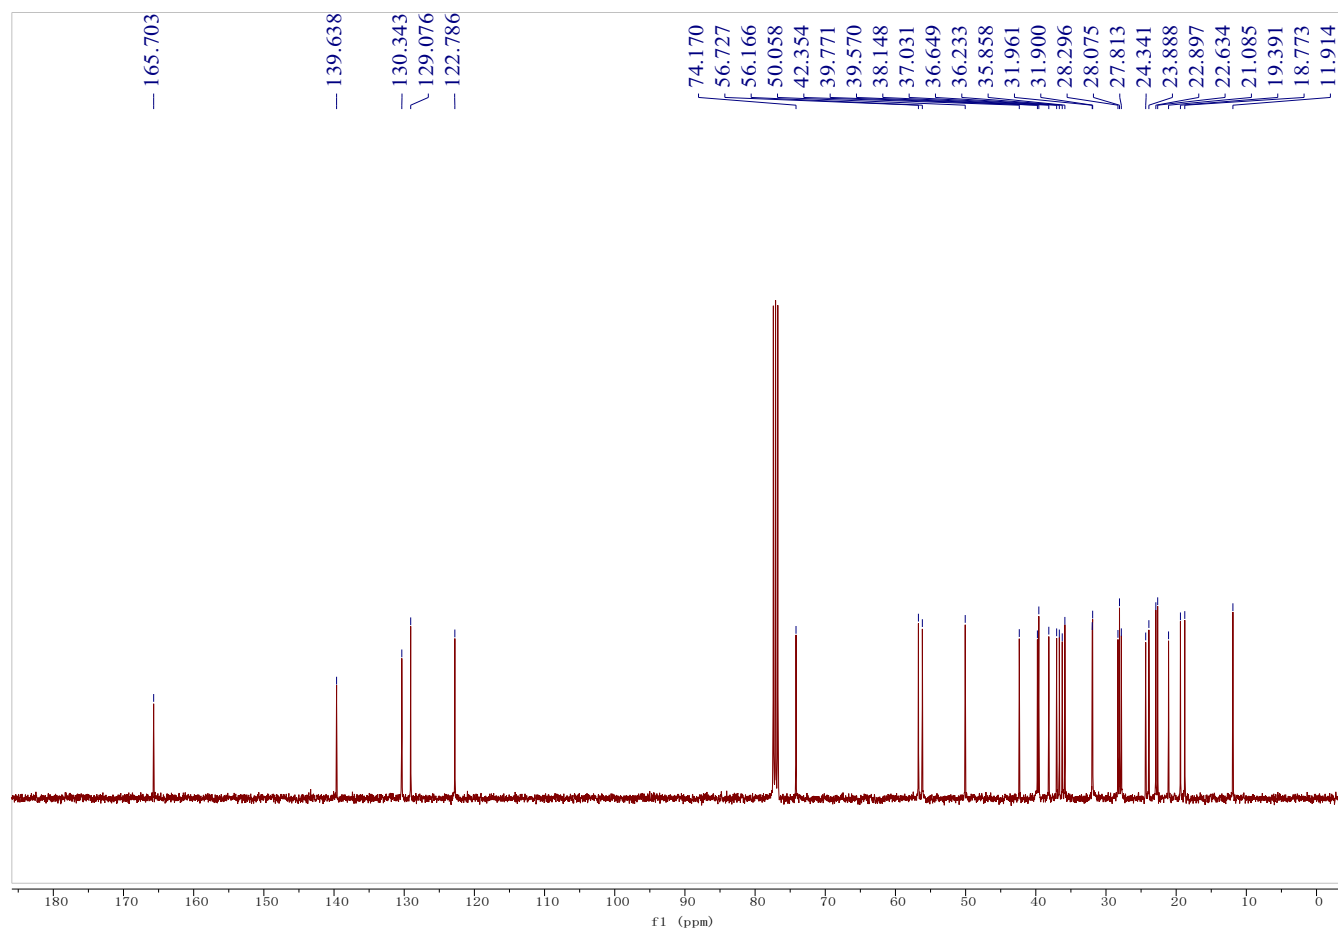

3a, <sup>1</sup>H NMR, 400 MHz, CDCl<sub>3</sub>

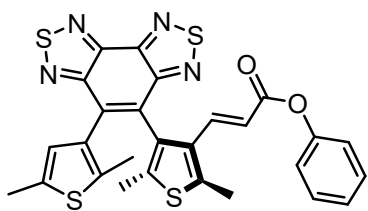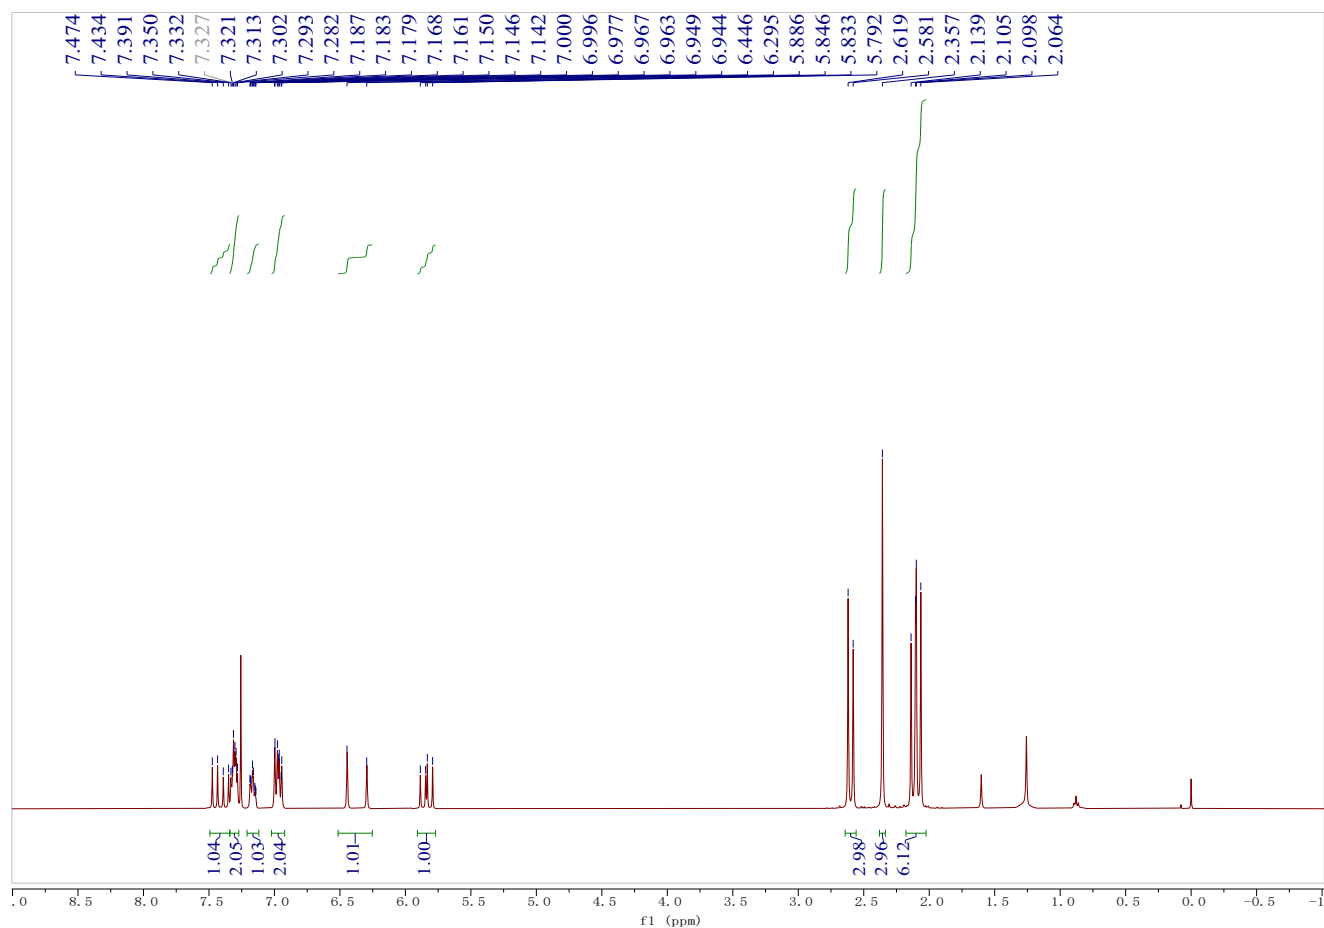



3a, <sup>13</sup>C NMR, 101 MHz, CDCl<sub>3</sub>

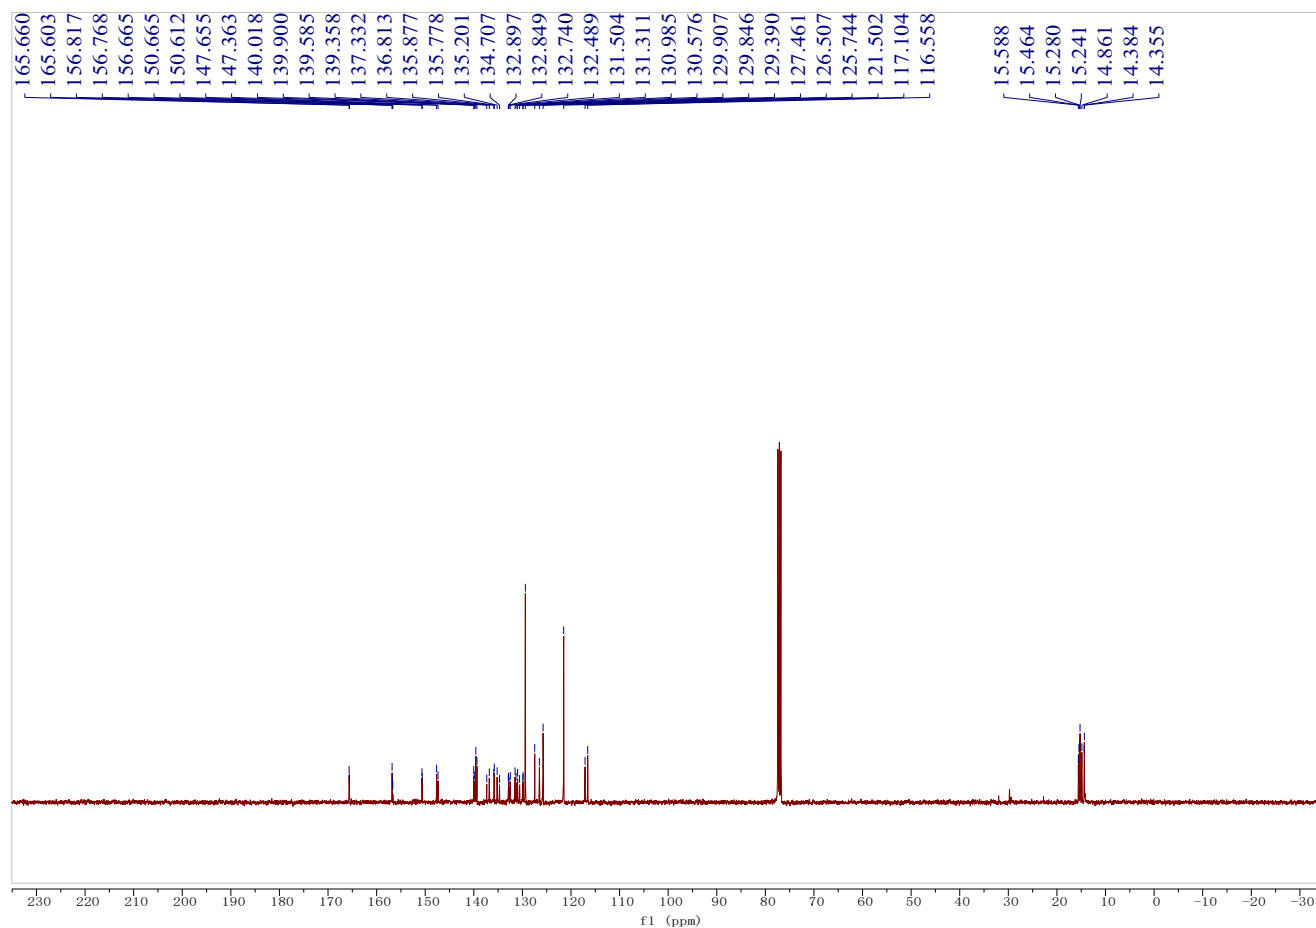

3b, <sup>1</sup>H NMR, 400 MHz, CDCl<sub>3</sub>

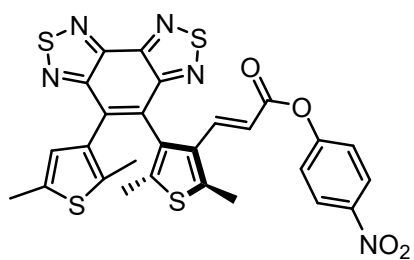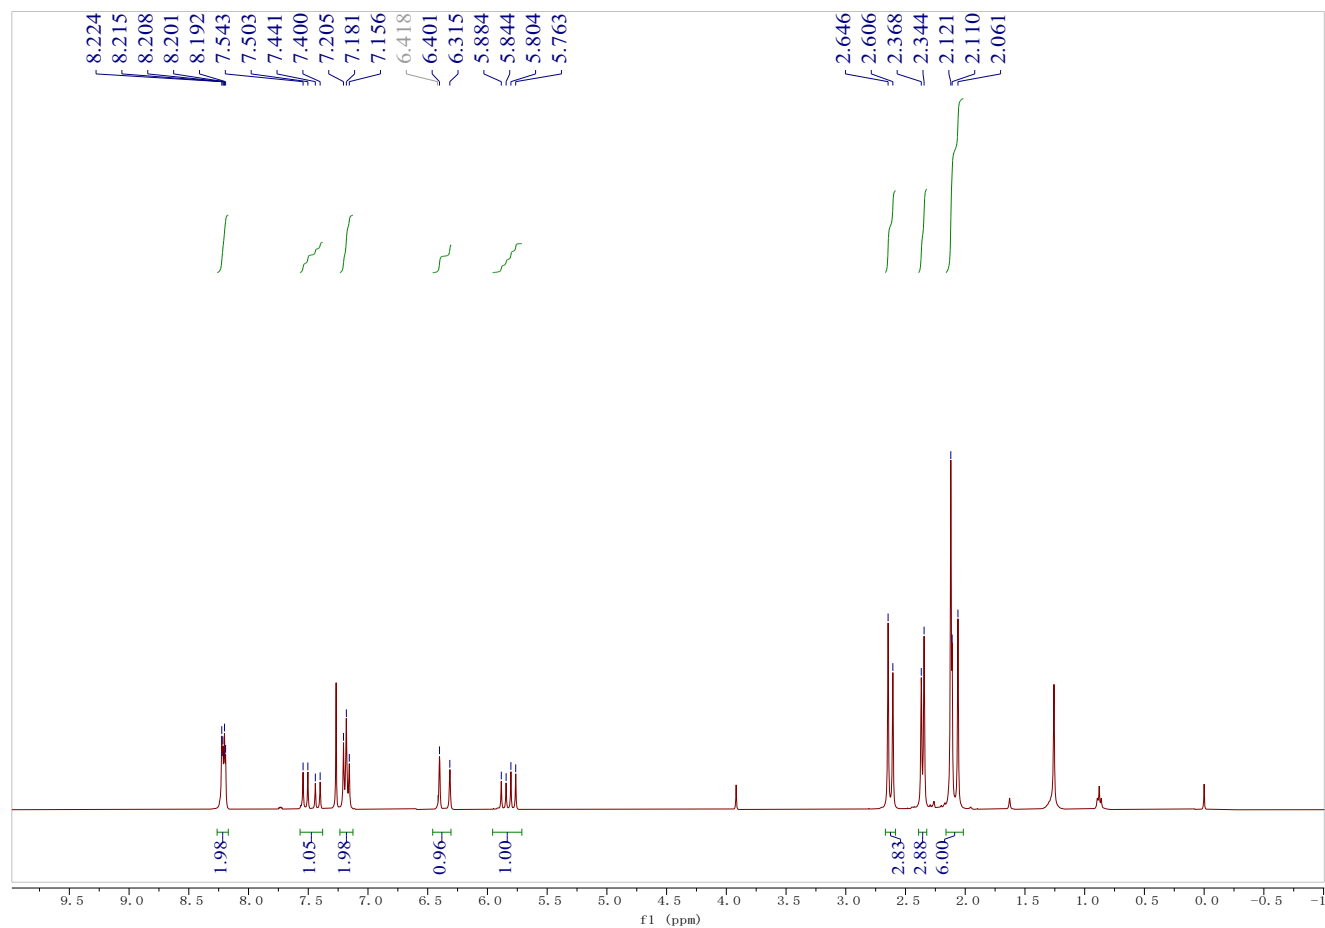

3b, <sup>13</sup>C NMR, 101 MHz, CDCl<sub>3</sub>

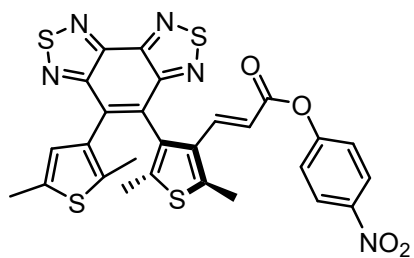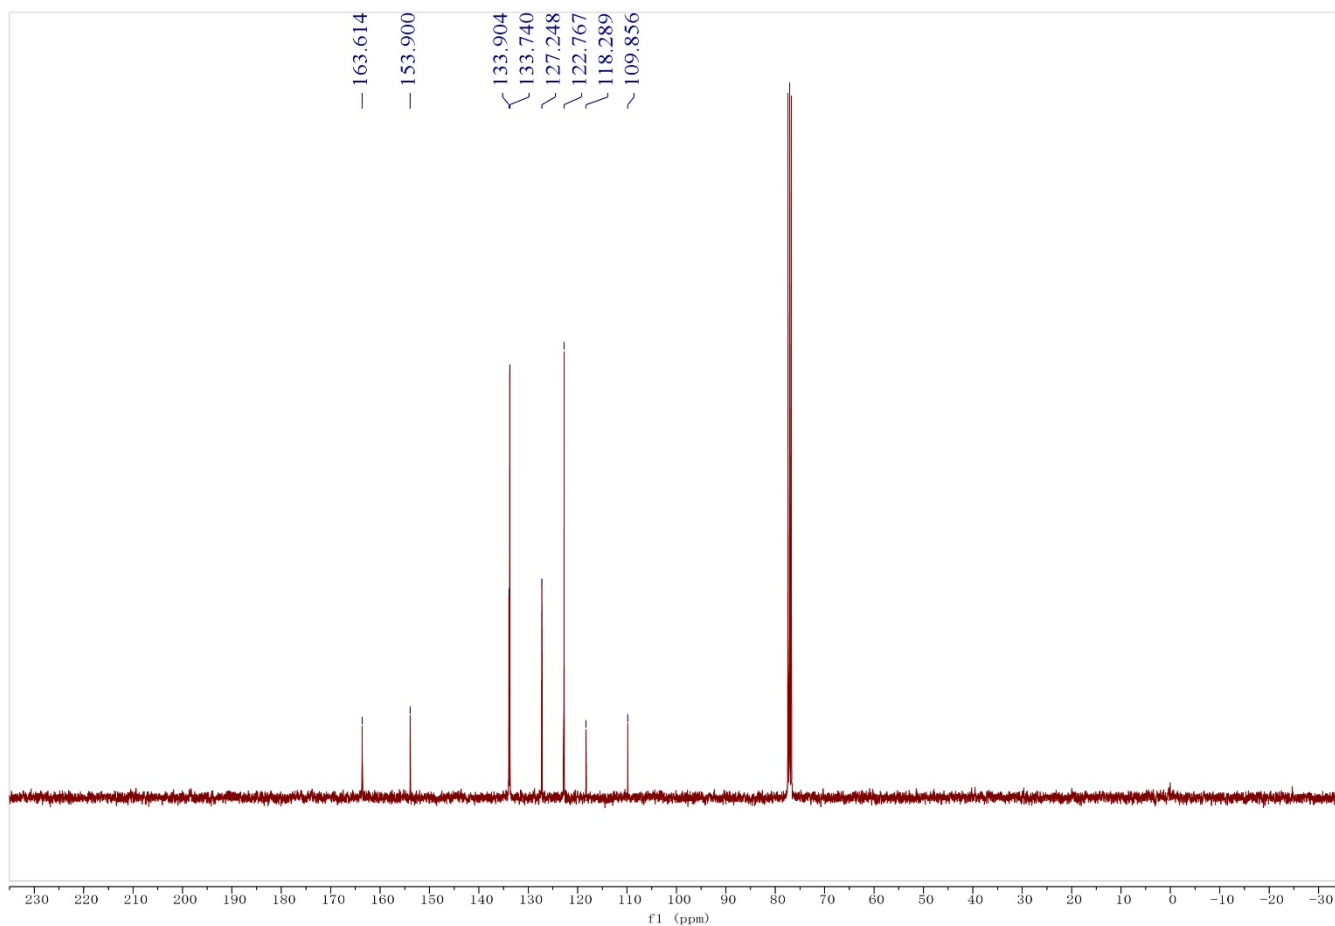

3c, <sup>1</sup>H NMR, 400 MHz, CDCl<sub>3</sub>

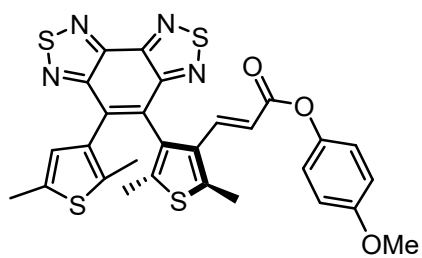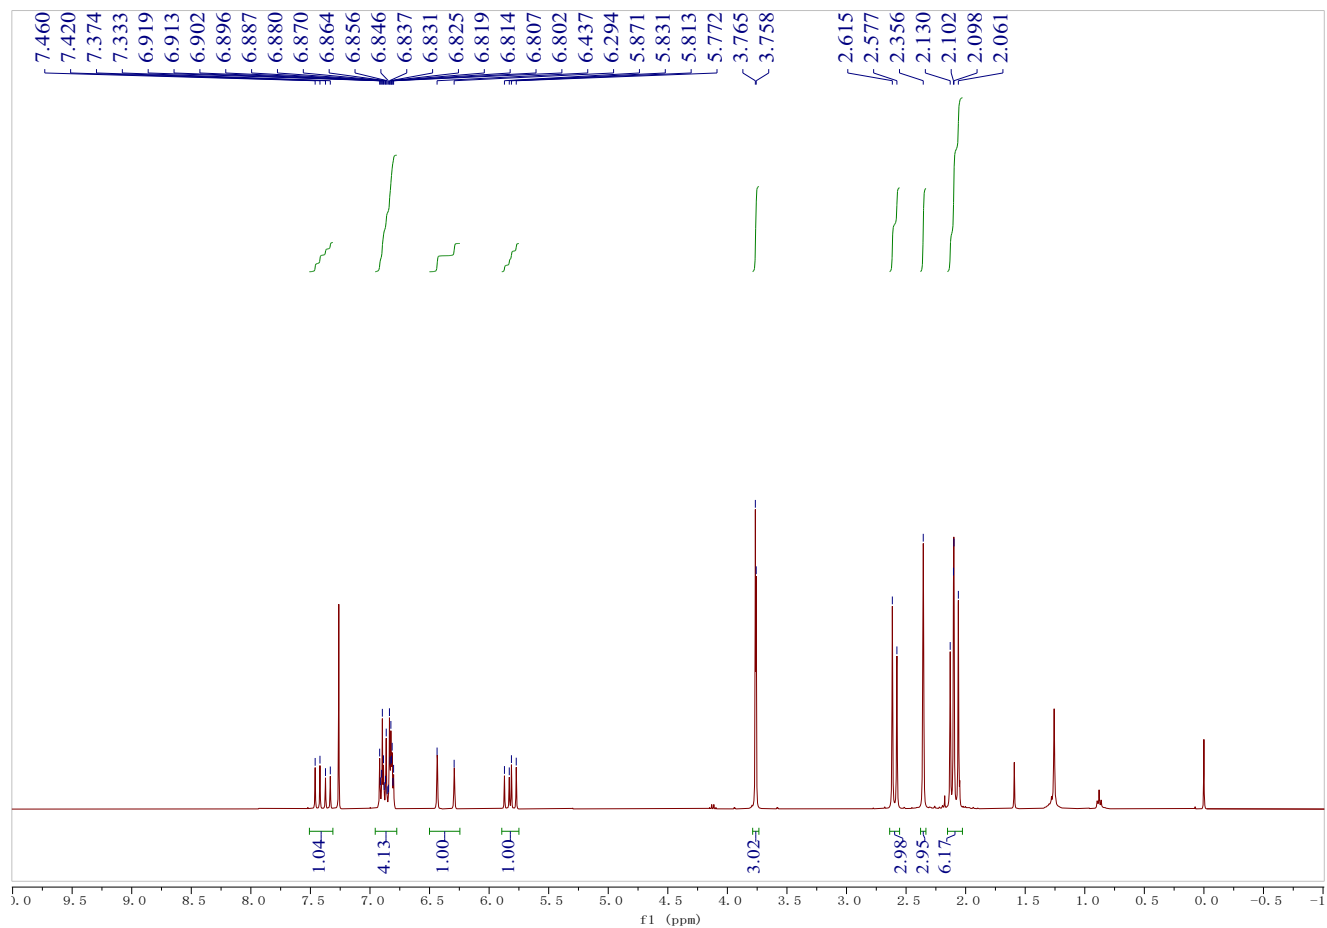

3c,  $^{13}\text{C}$  NMR, 101 MHz,  $\text{CDCl}_3$

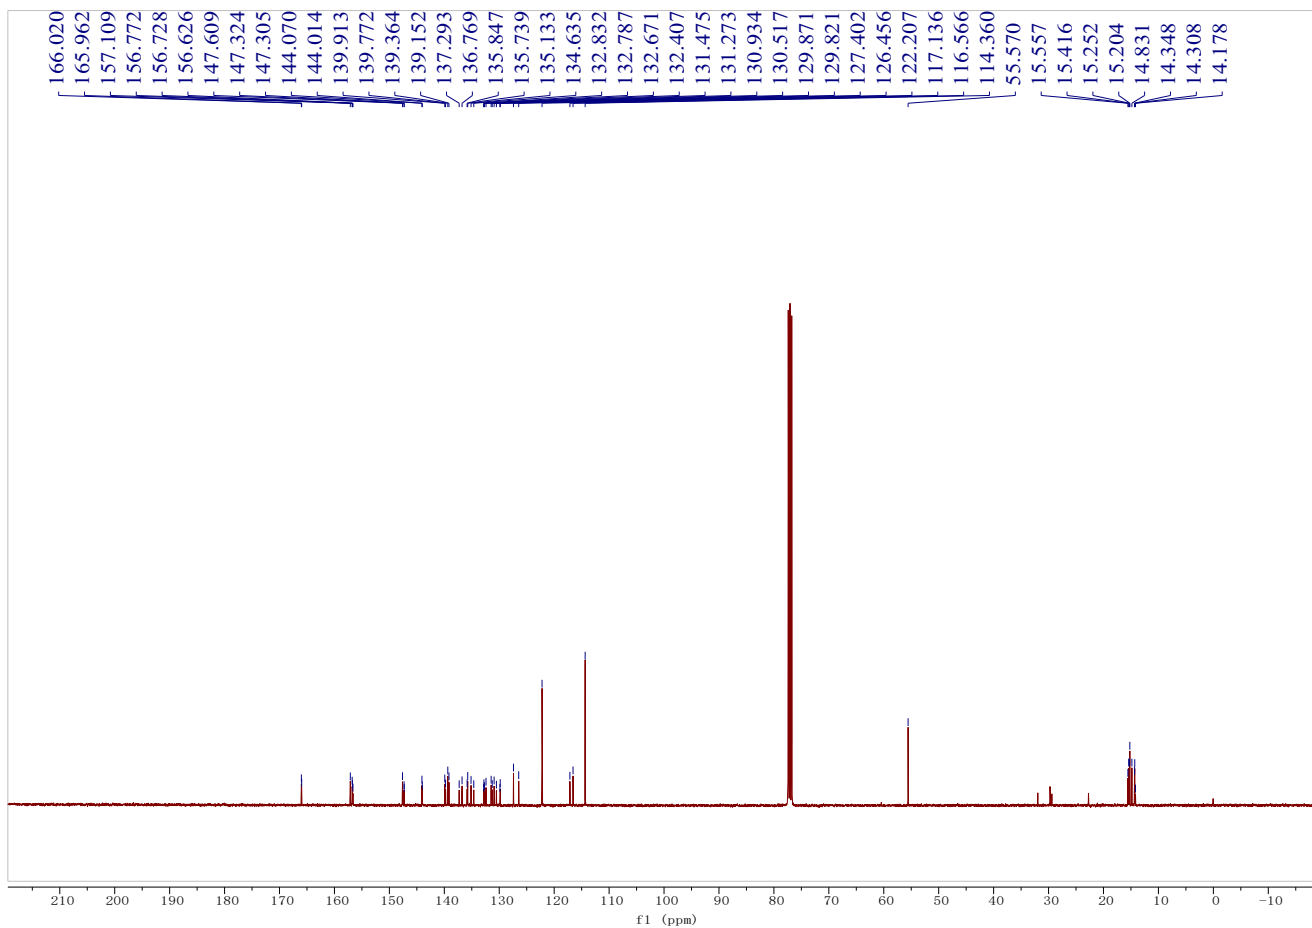

3d, <sup>1</sup>H NMR, 400 MHz, CDCl<sub>3</sub>

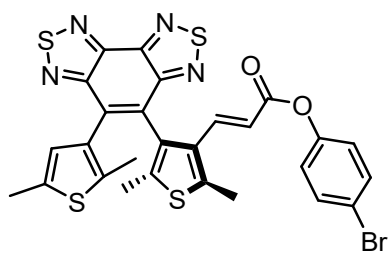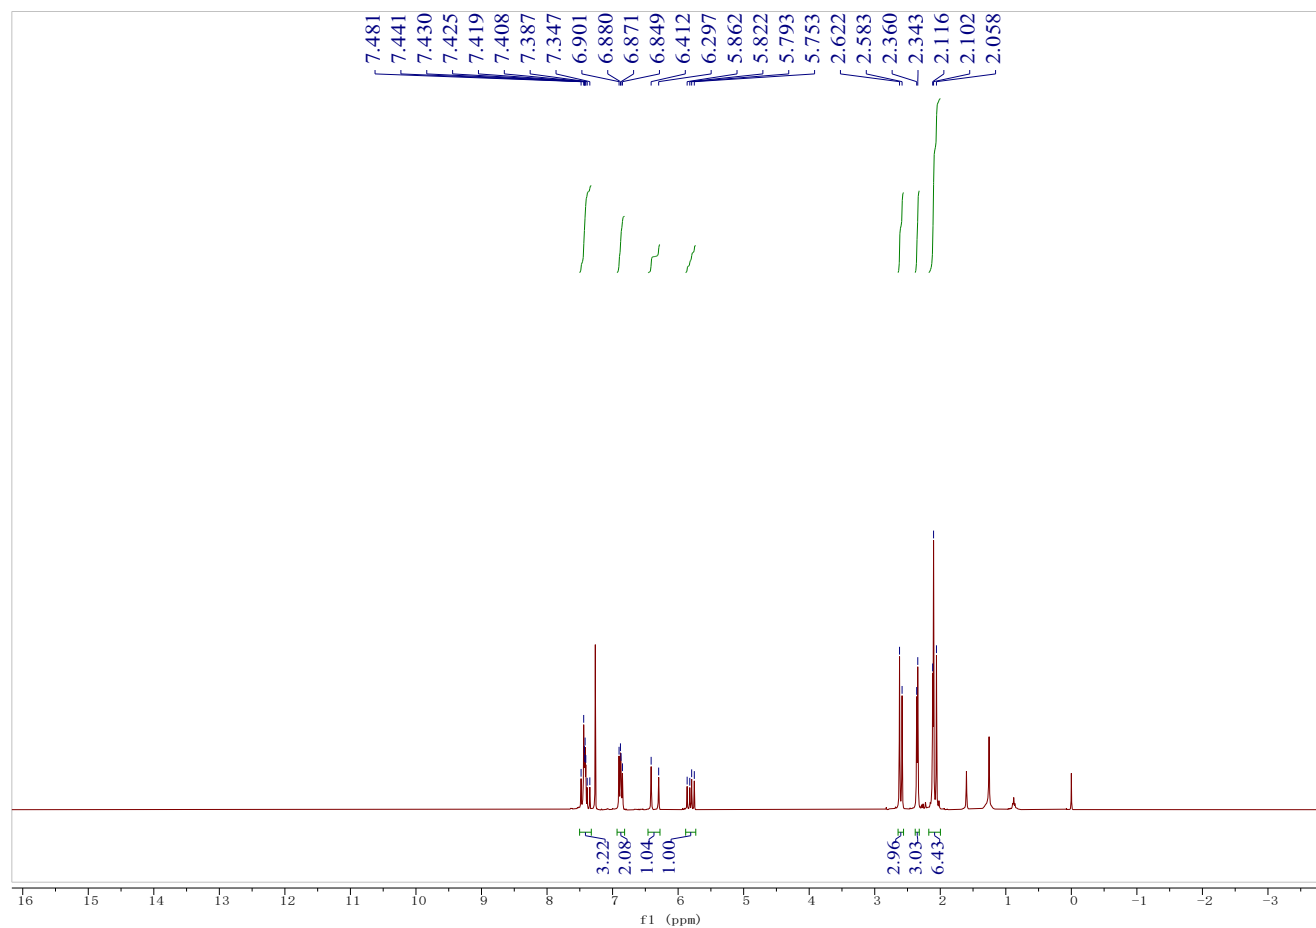

3d,  $^{13}\text{C}$  NMR, 101 MHz,  $\text{CDCl}_3$

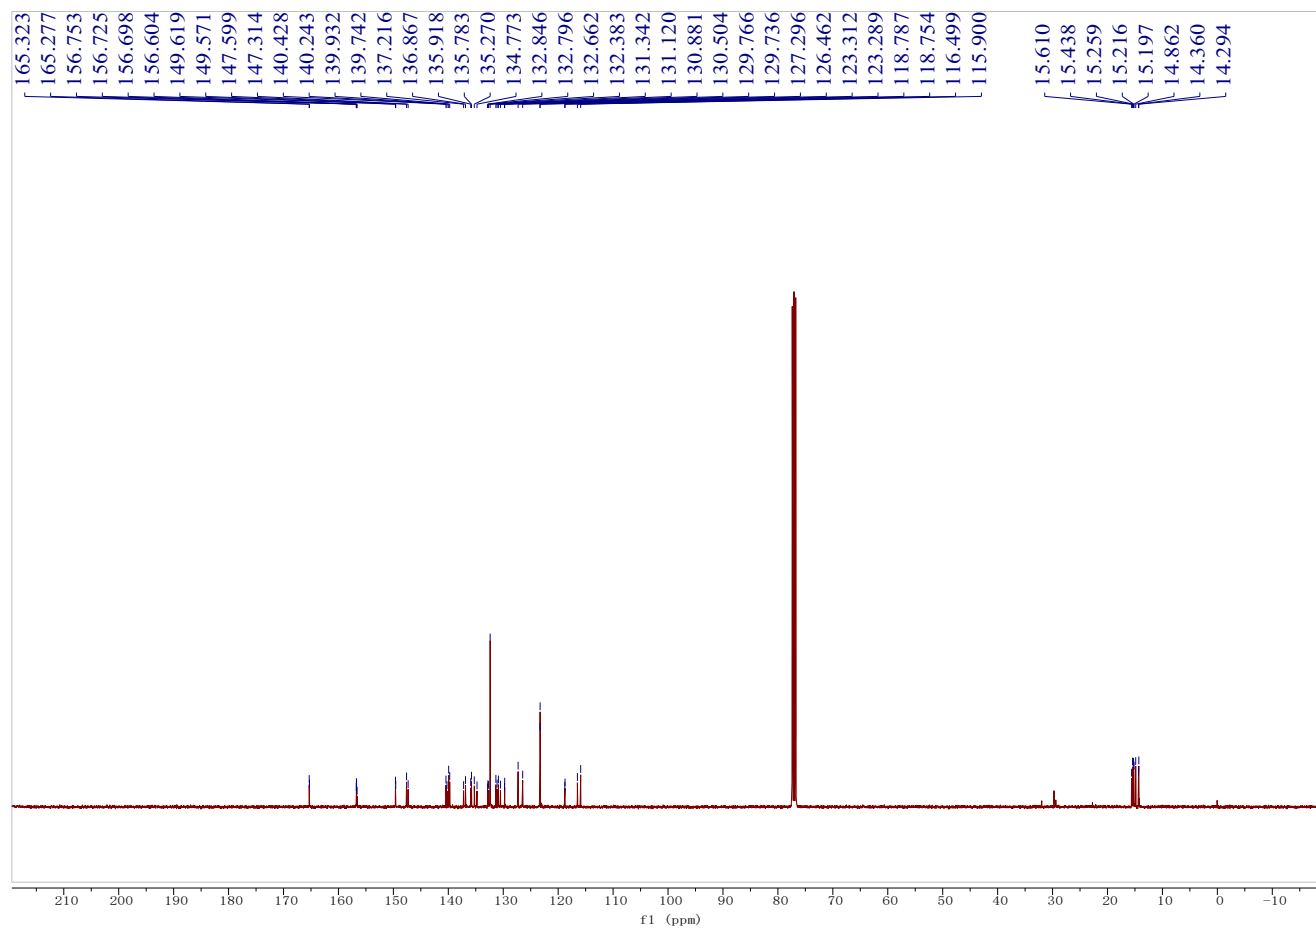

3e, <sup>1</sup>H NMR, 400 MHz, CDCl<sub>3</sub>

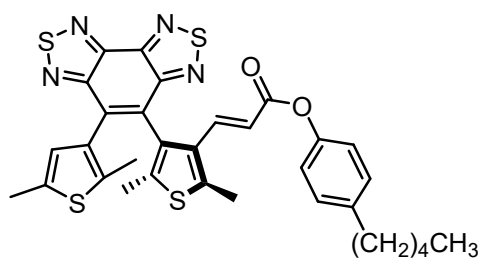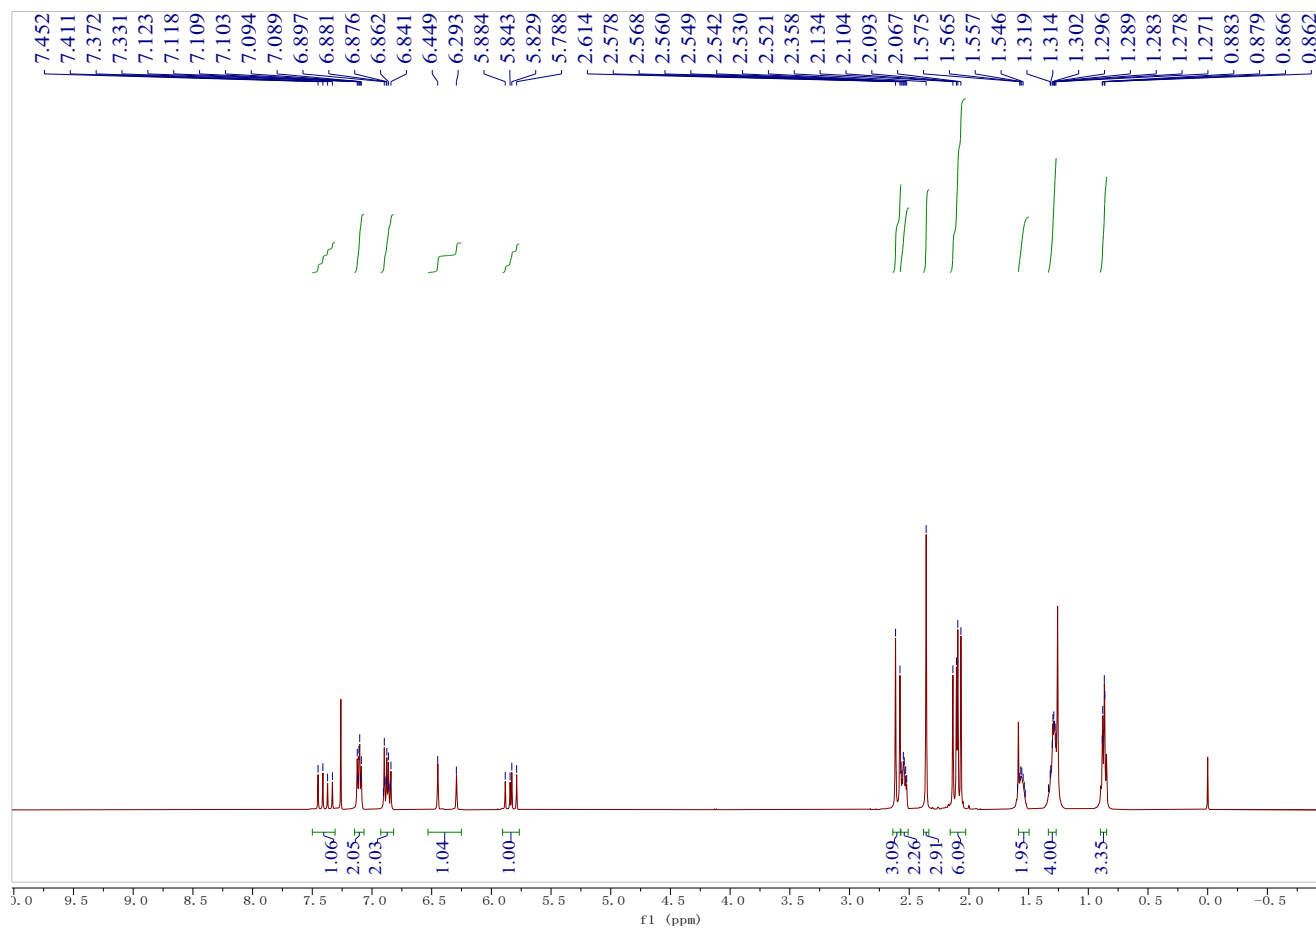



3e,  $^{13}\text{C}$  NMR, 101 MHz,  $\text{CDCl}_3$

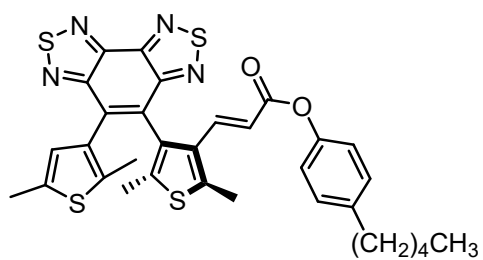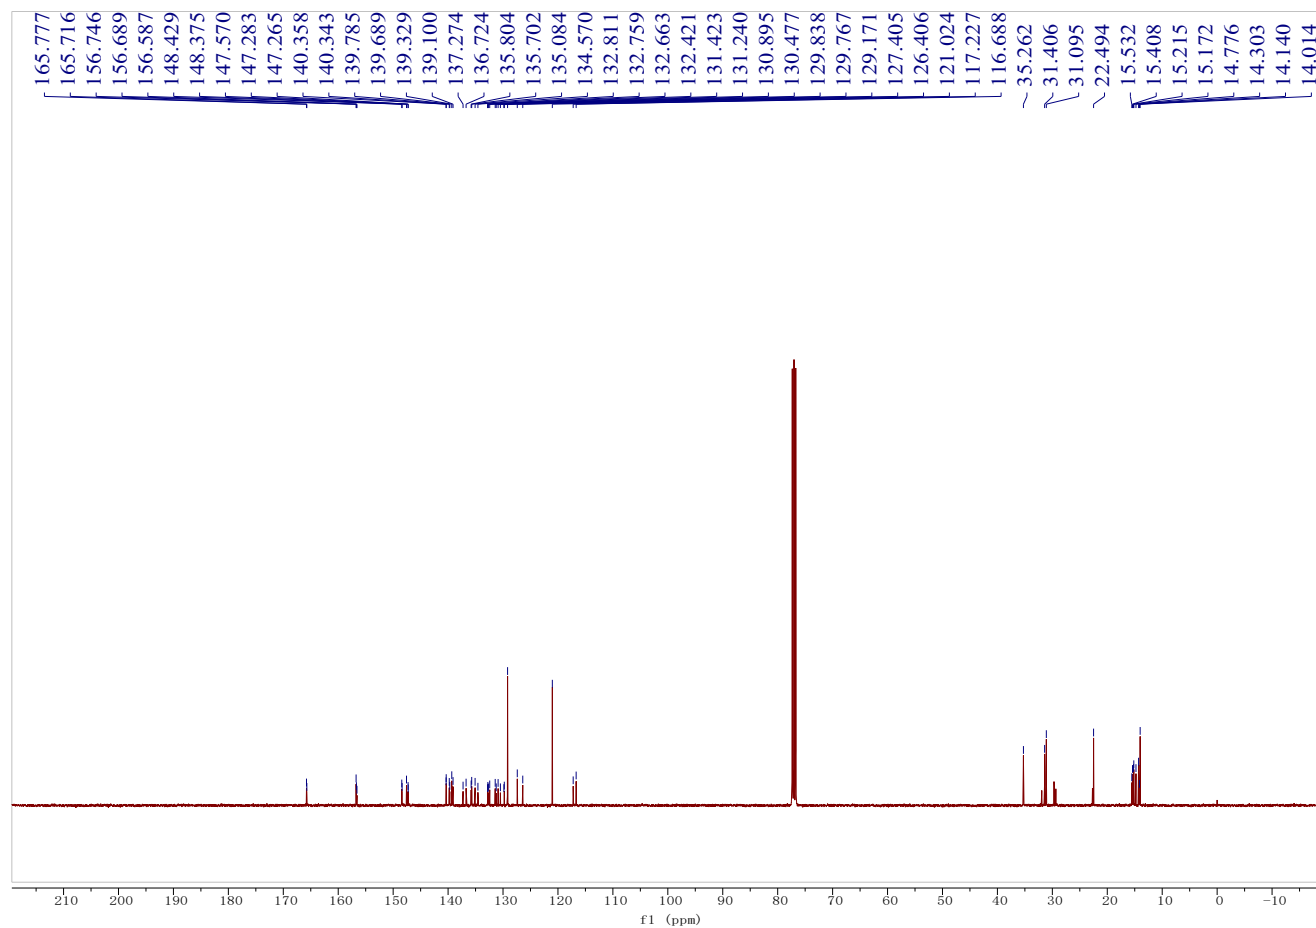

3f, <sup>1</sup>H NMR, 400 MHz, CDCl<sub>3</sub>

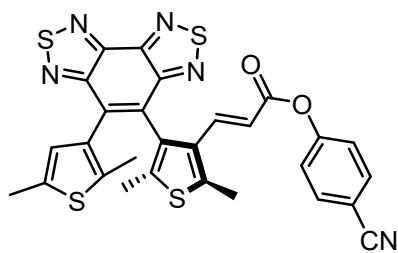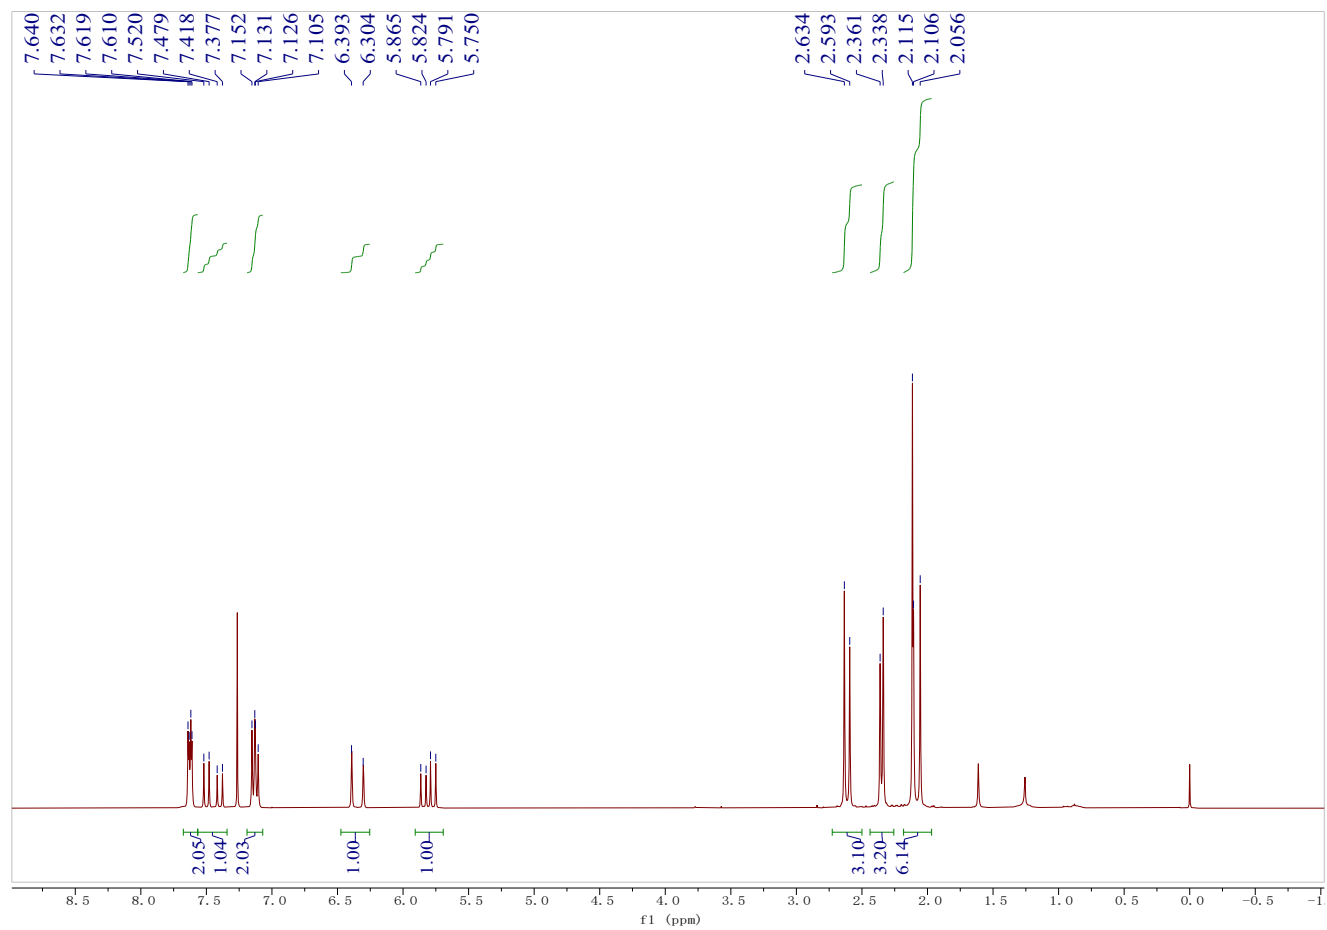

3f, <sup>13</sup>C NMR, 101 MHz, CDCl<sub>3</sub>

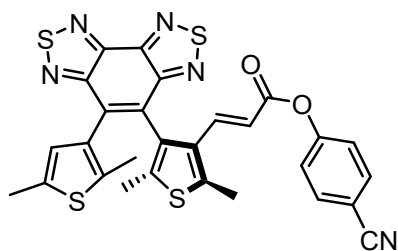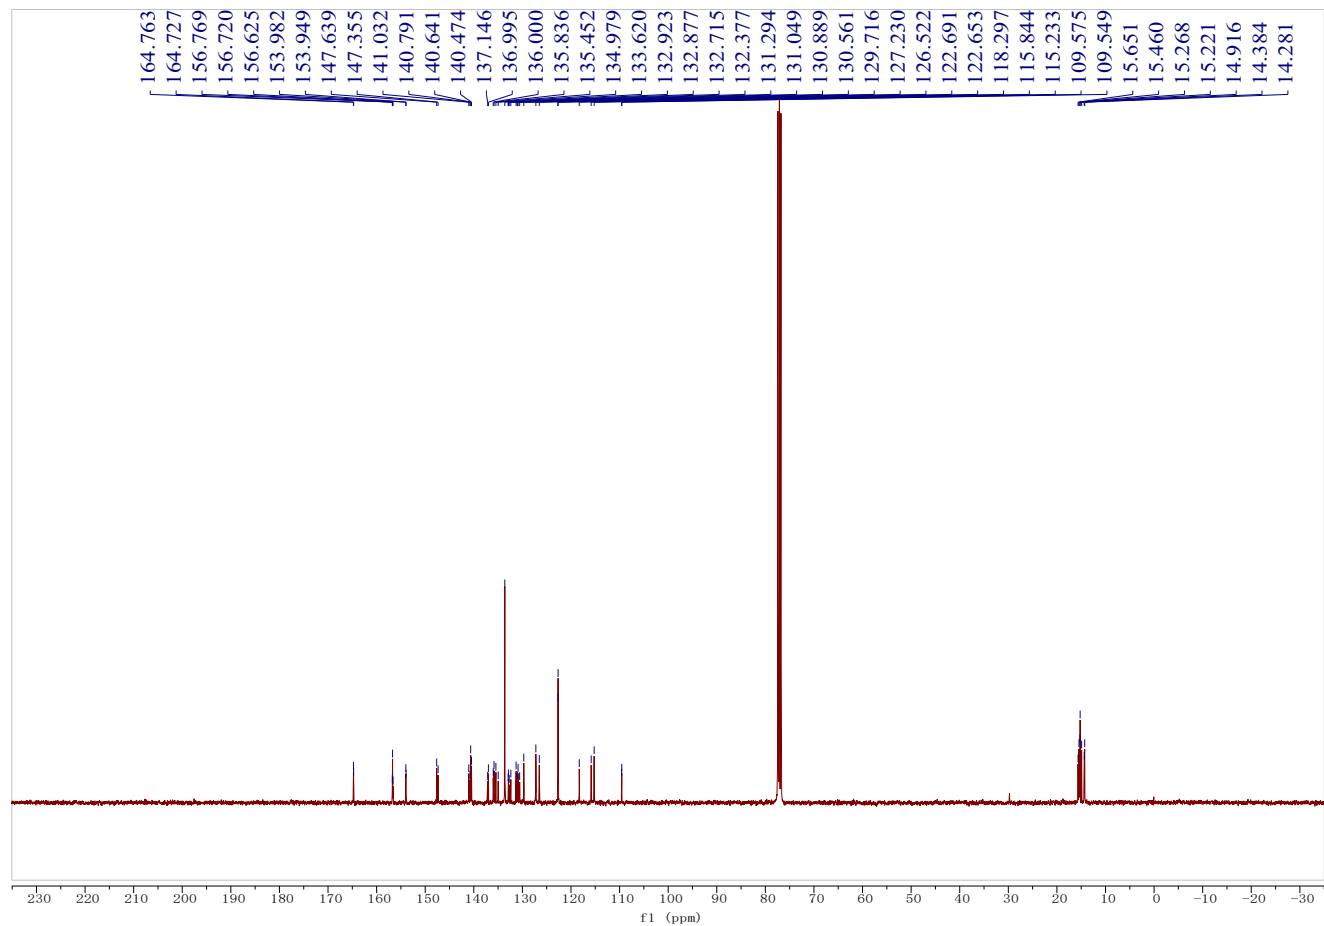

3g, <sup>1</sup>H NMR, 400 MHz, CDCl<sub>3</sub>

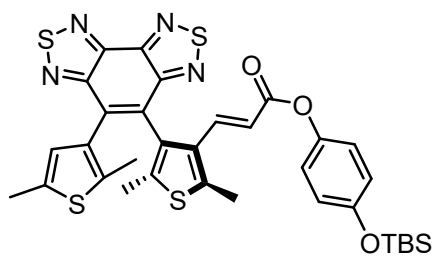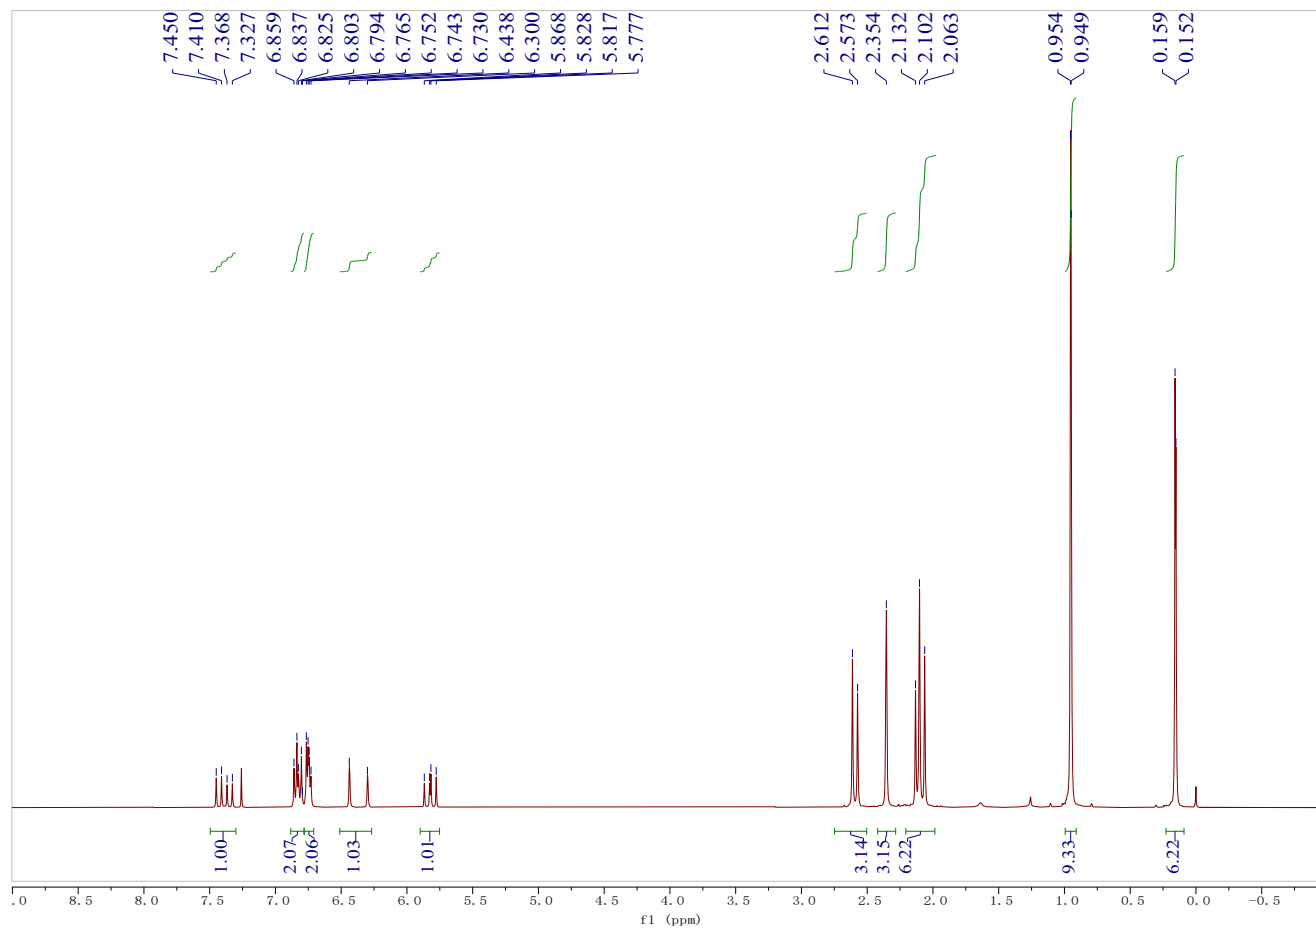

3g,  $^{13}\text{C}$  NMR, 101 MHz,  $\text{CDCl}_3$

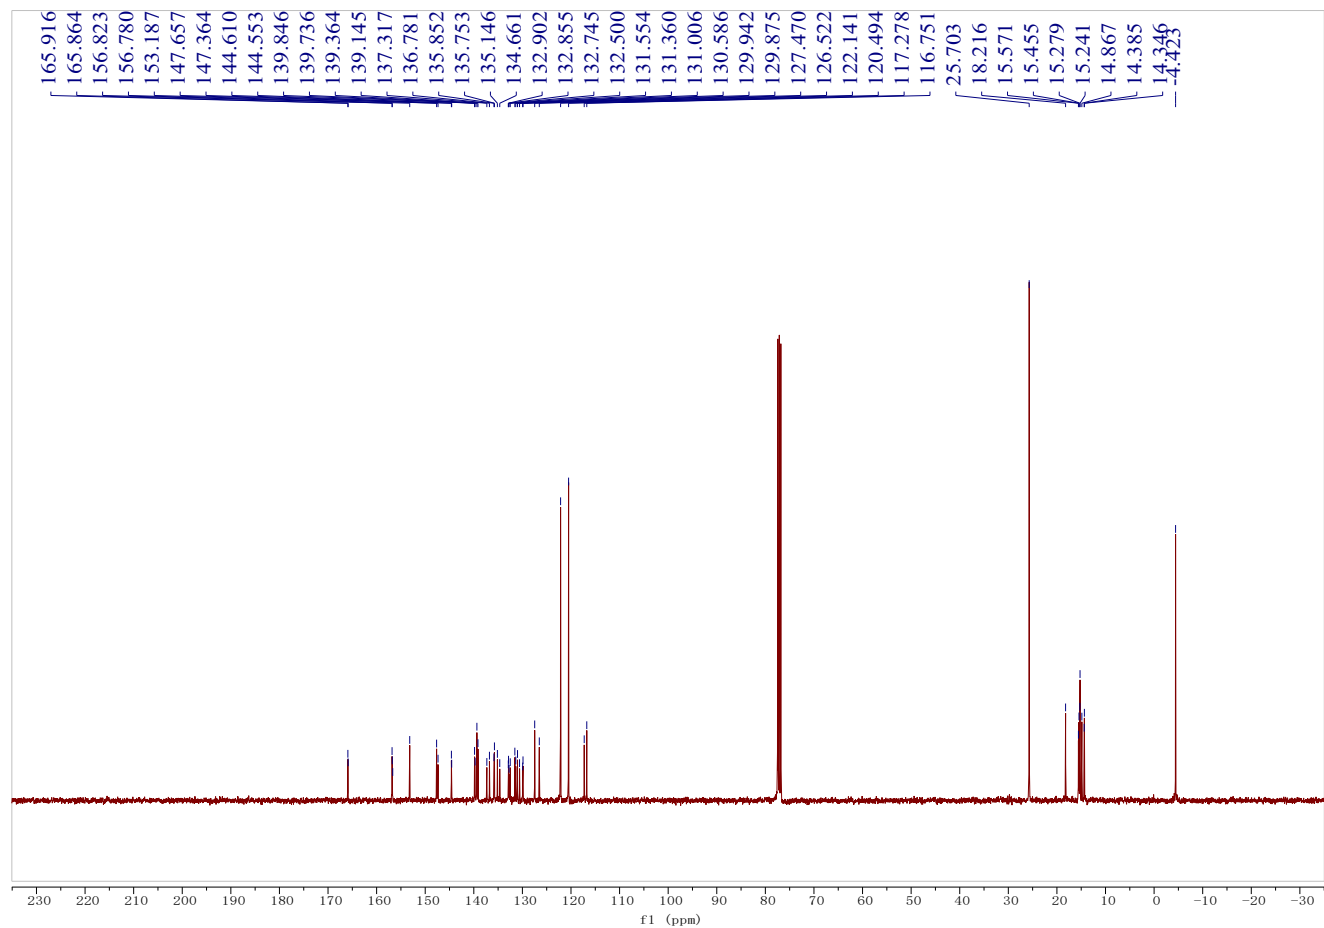

3h, <sup>1</sup>H NMR, 400 MHz, CDCl<sub>3</sub>

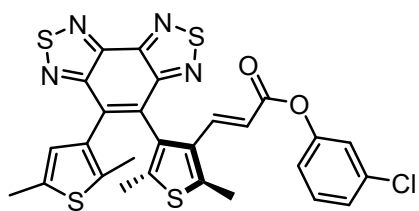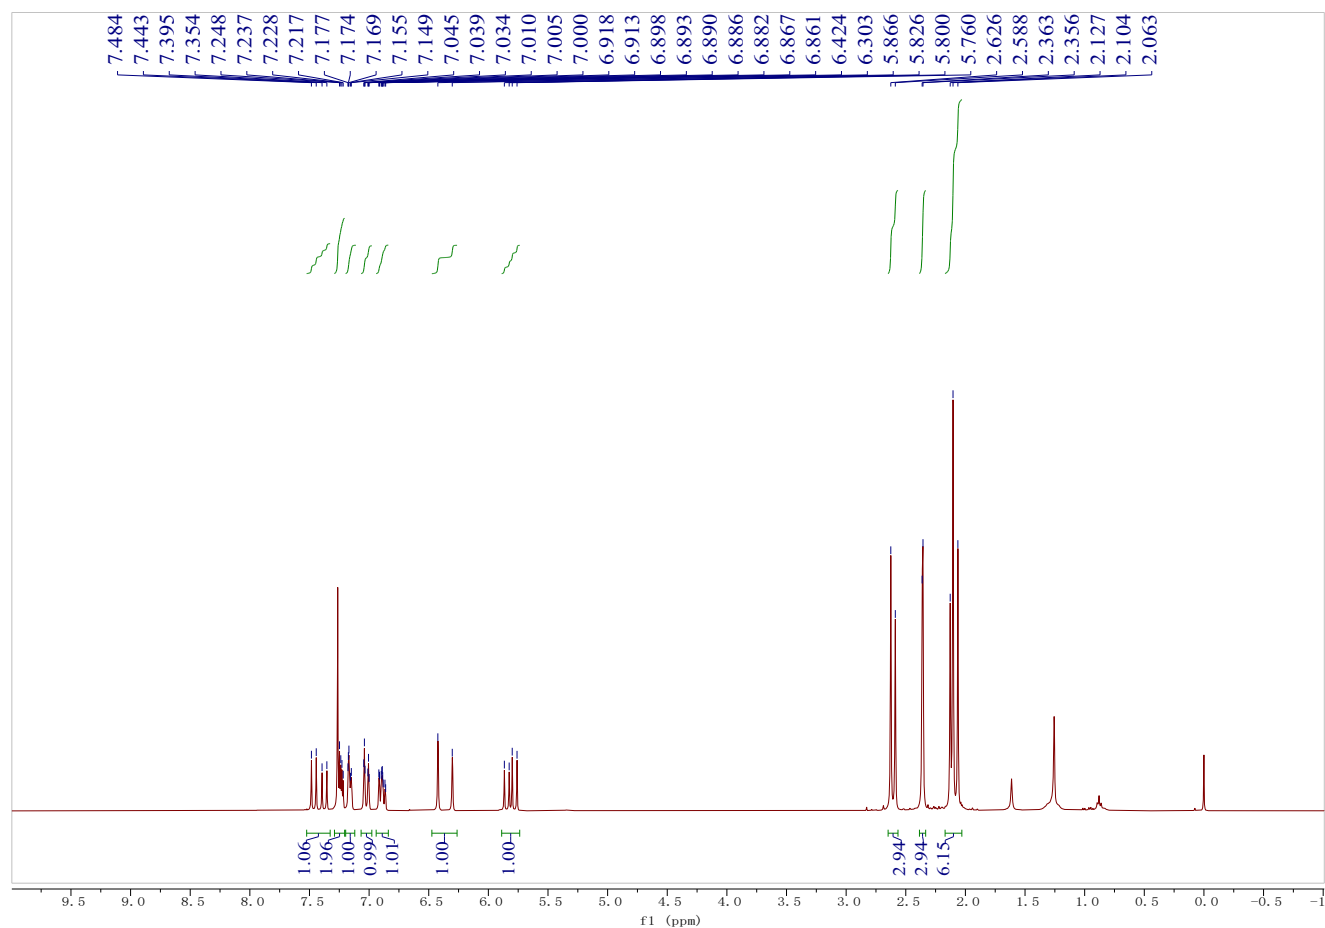

3h,  $^{13}\text{C}$  NMR, 101 MHz,  $\text{CDCl}_3$

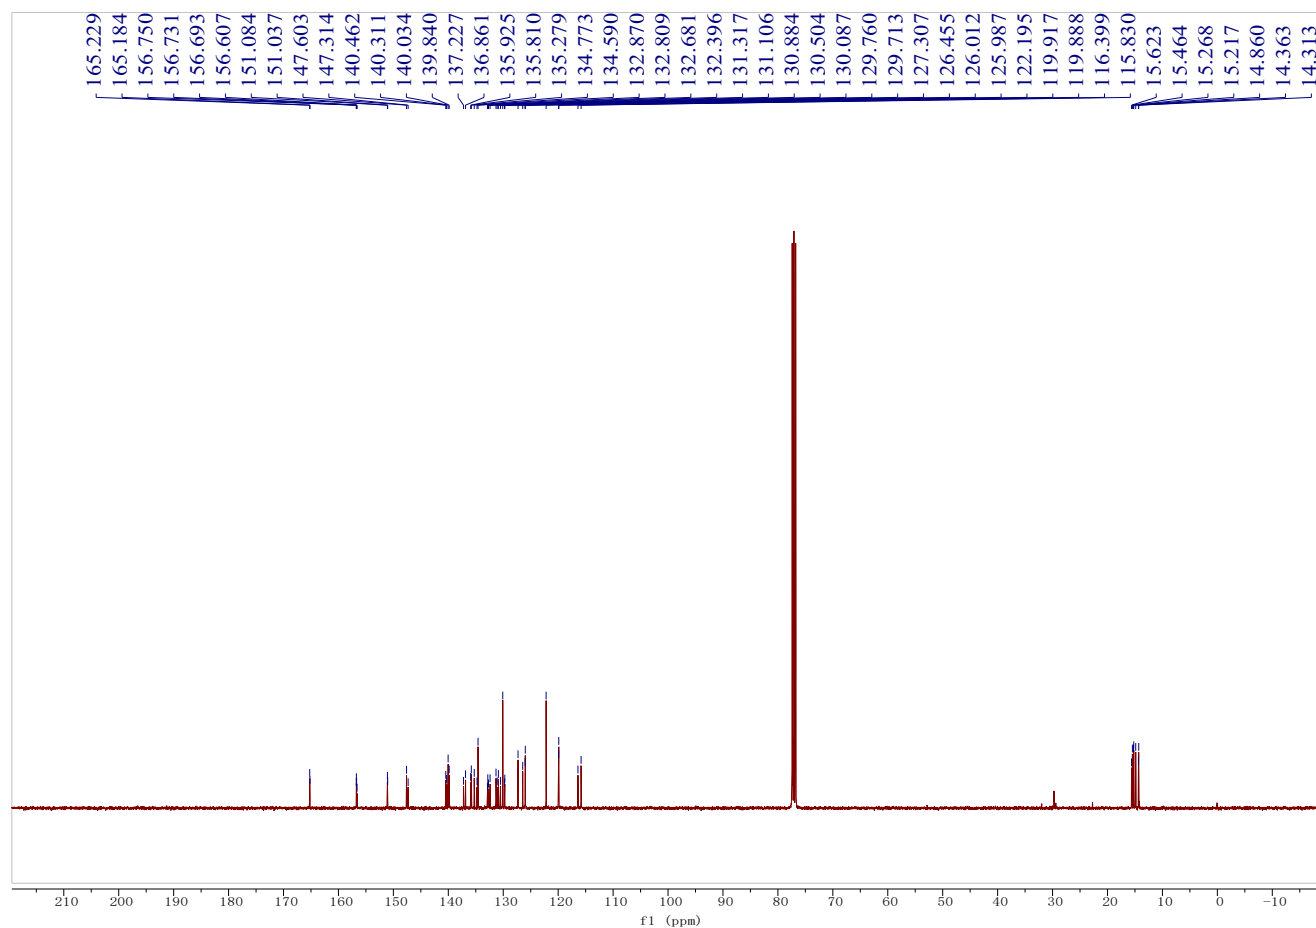

3i, <sup>1</sup>H NMR, 400 MHz, CDCl<sub>3</sub>

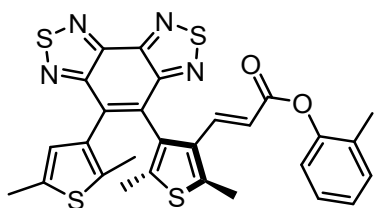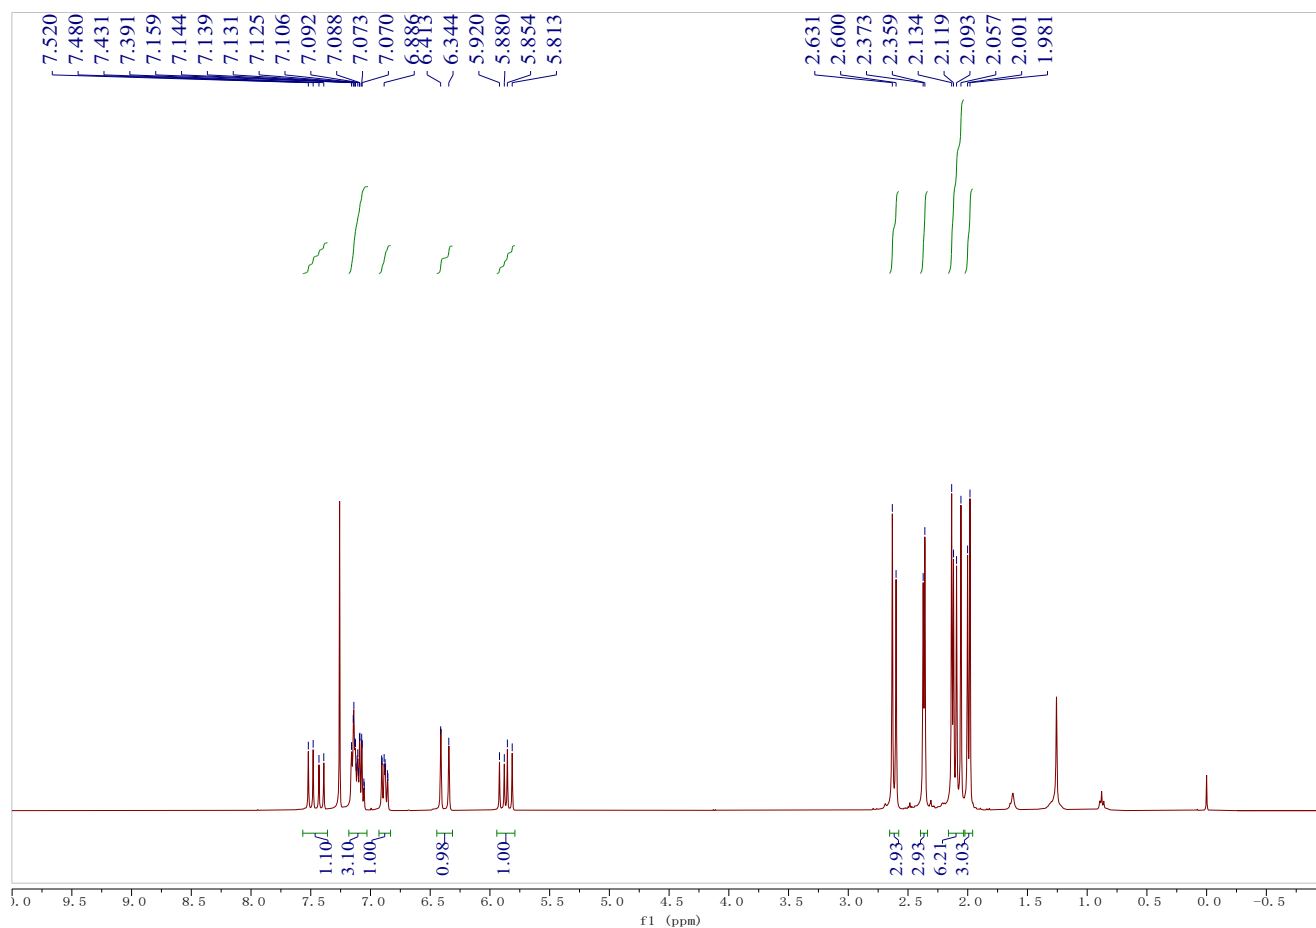



3i, <sup>13</sup>C NMR, 101 MHz, CDCl<sub>3</sub>

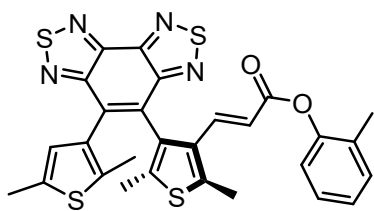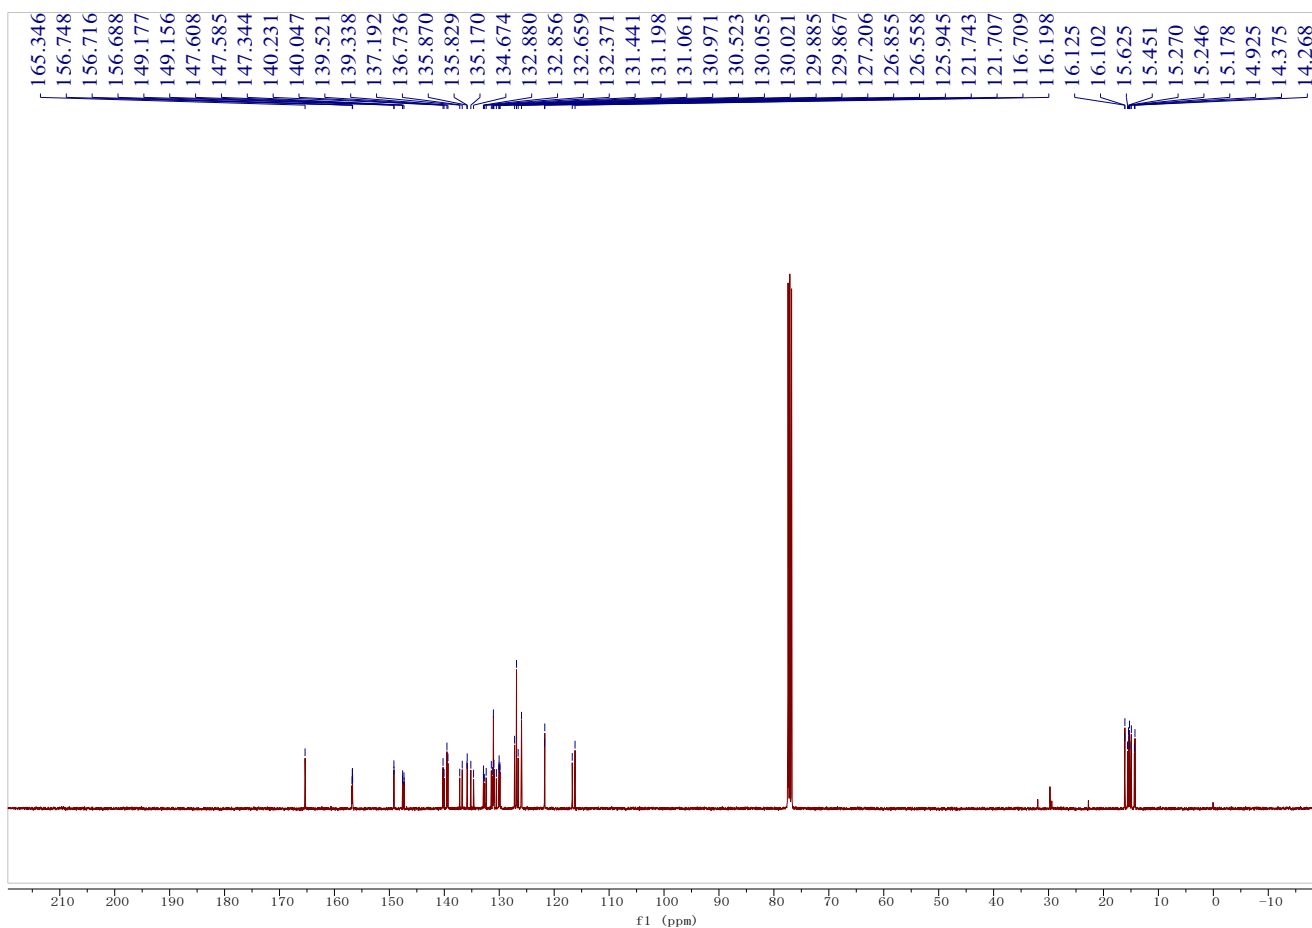

3j, <sup>1</sup>H NMR, 400 MHz, CDCl<sub>3</sub>

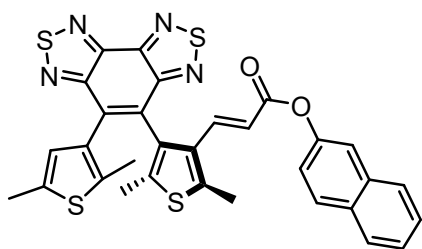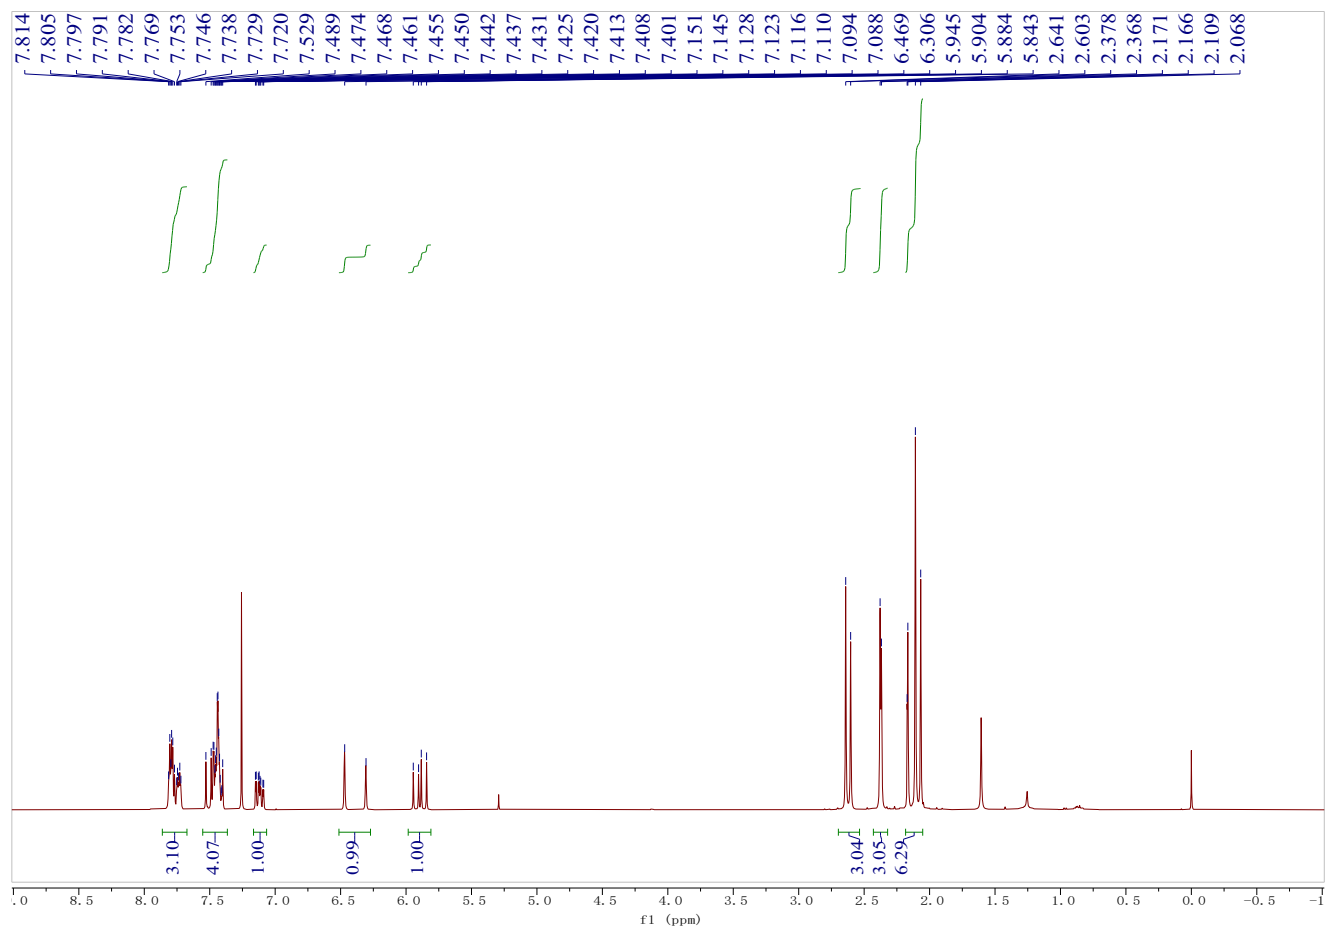

3j, <sup>13</sup>C NMR, 101 MHz, CDCl<sub>3</sub>

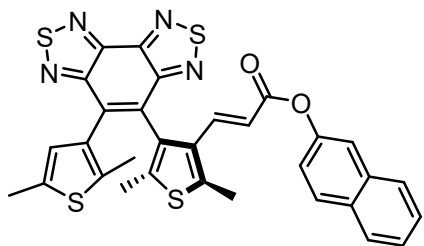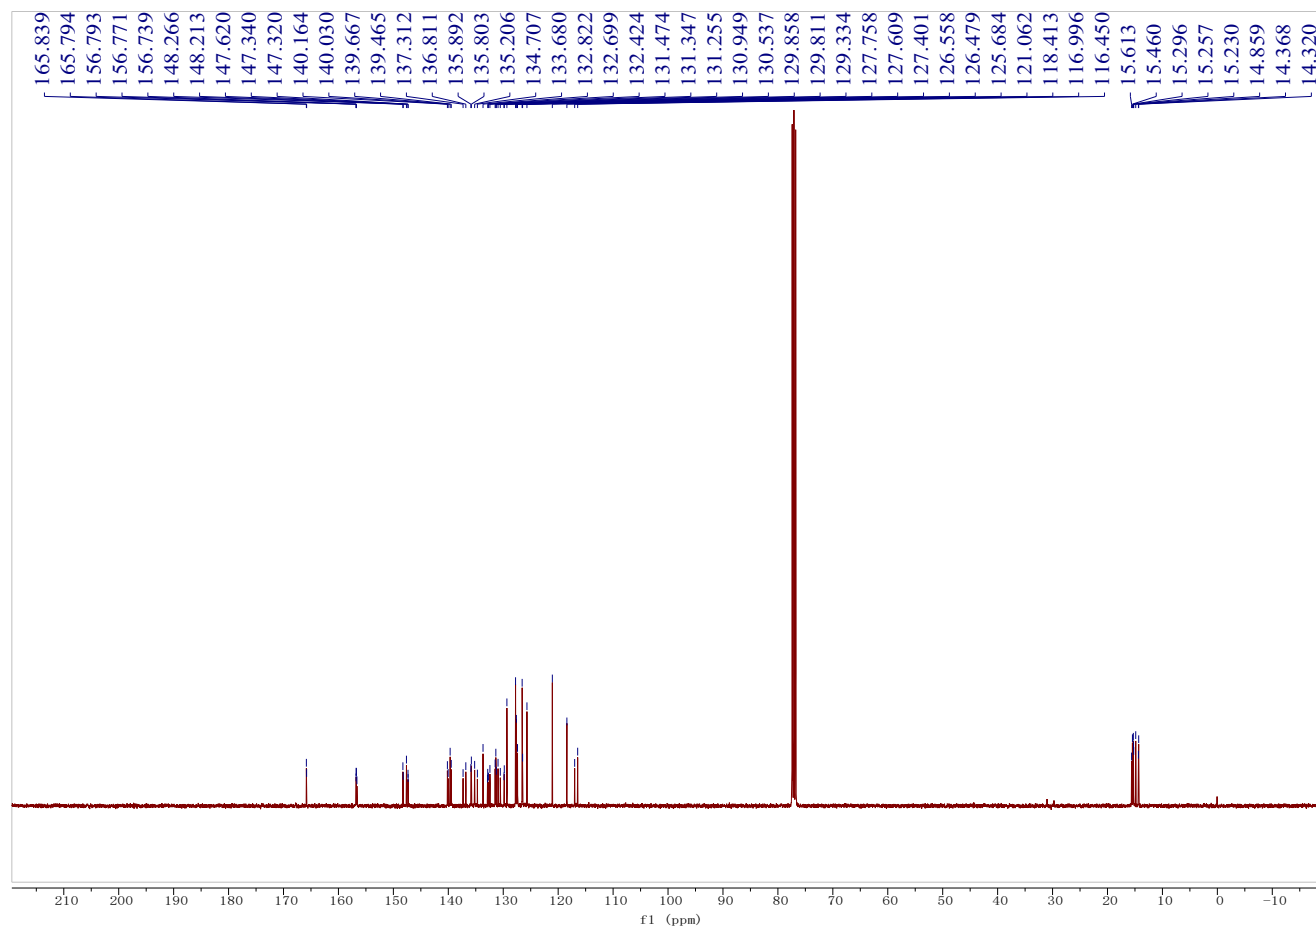

3k, <sup>1</sup>H NMR, 400 MHz, CDCl<sub>3</sub>

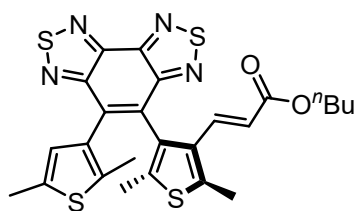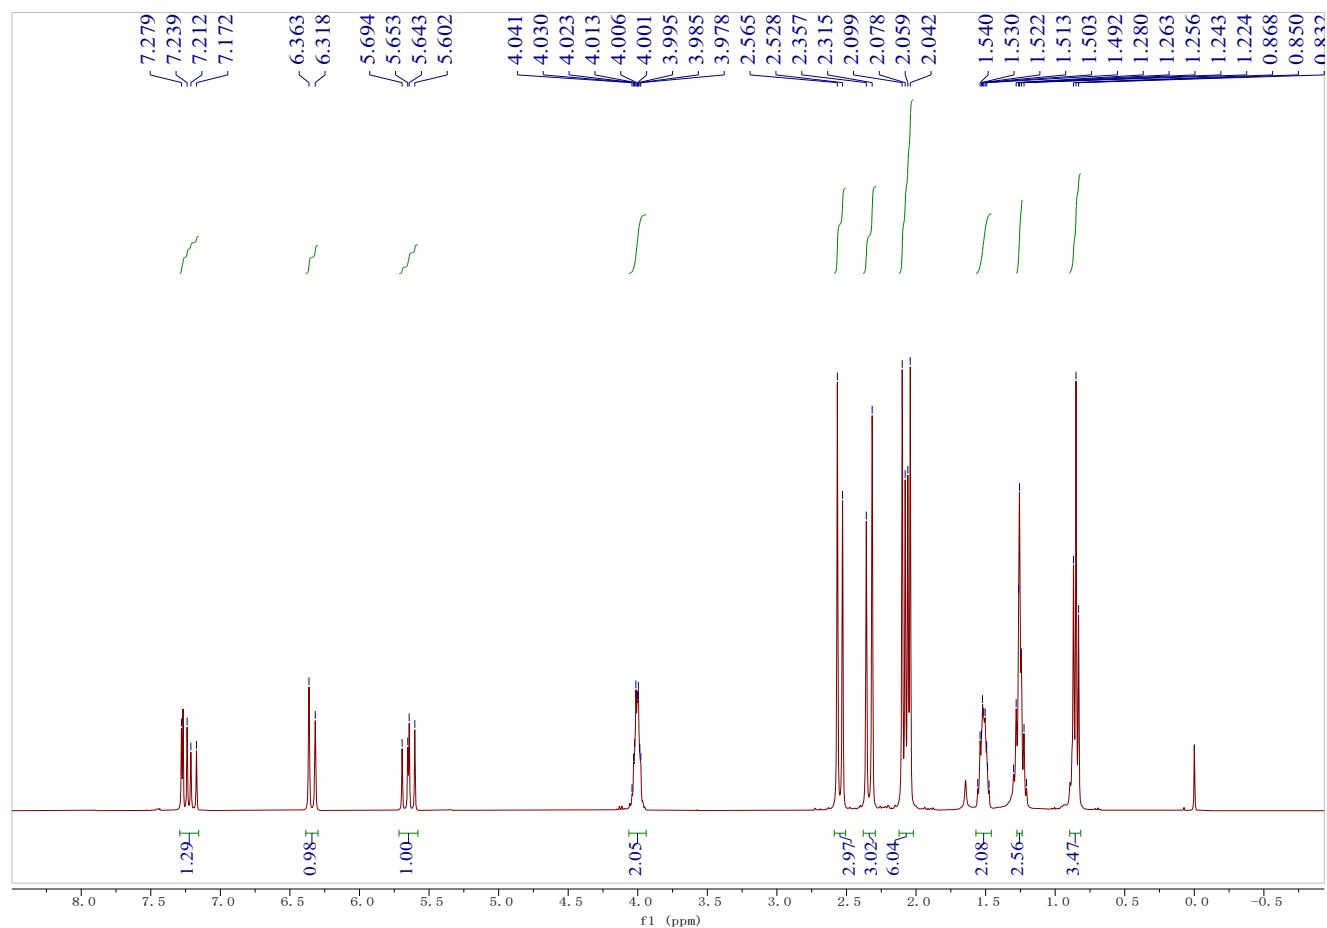

3k,  $^{13}\text{C}$  NMR, 101 MHz,  $\text{CDCl}_3$

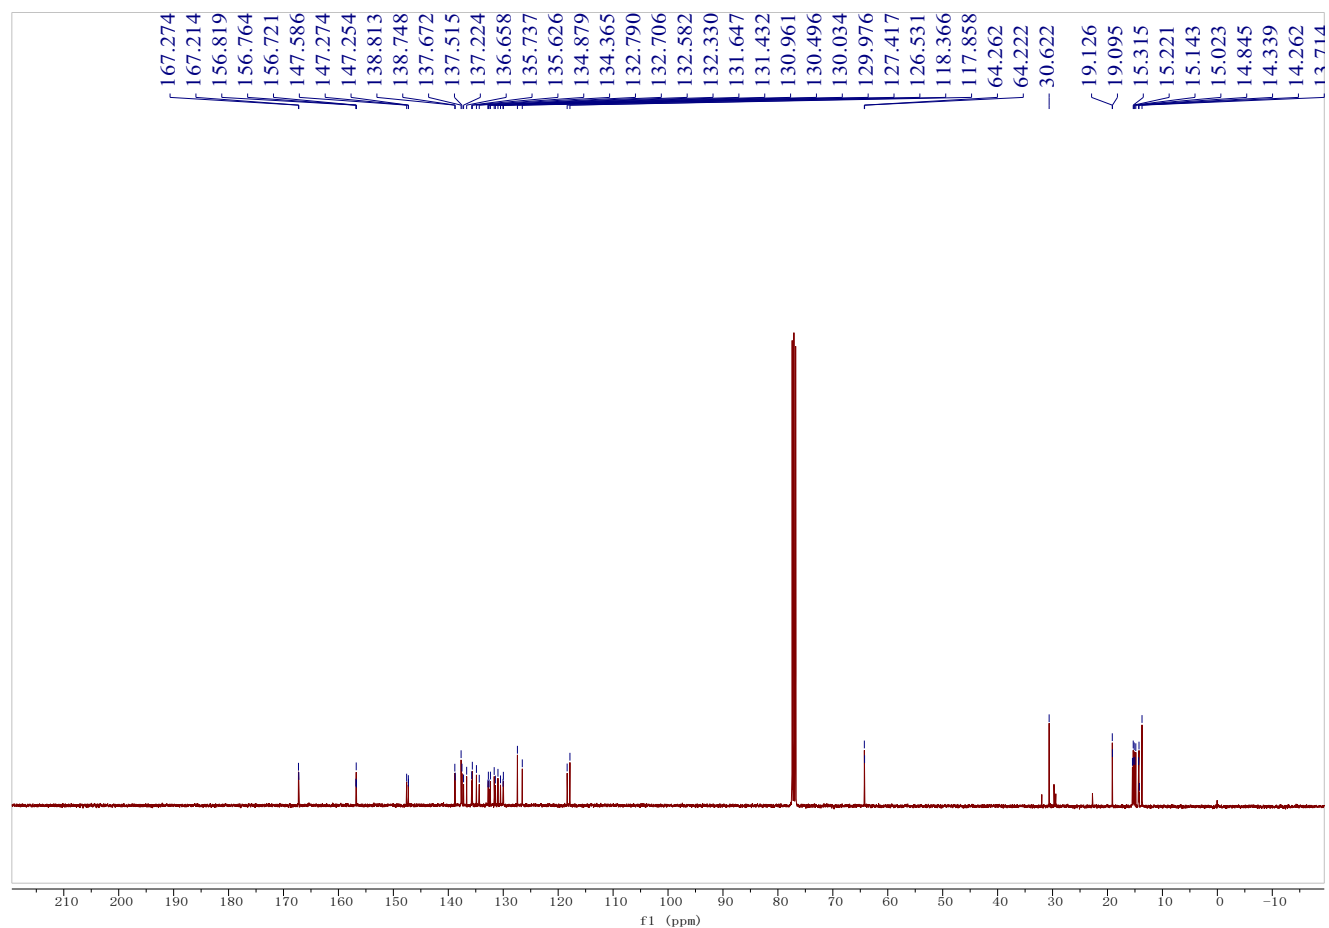

31, <sup>1</sup>H NMR, 400 MHz, CDCl<sub>3</sub>

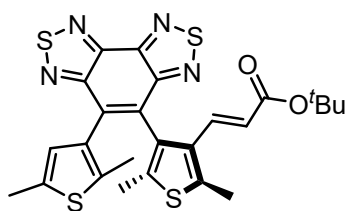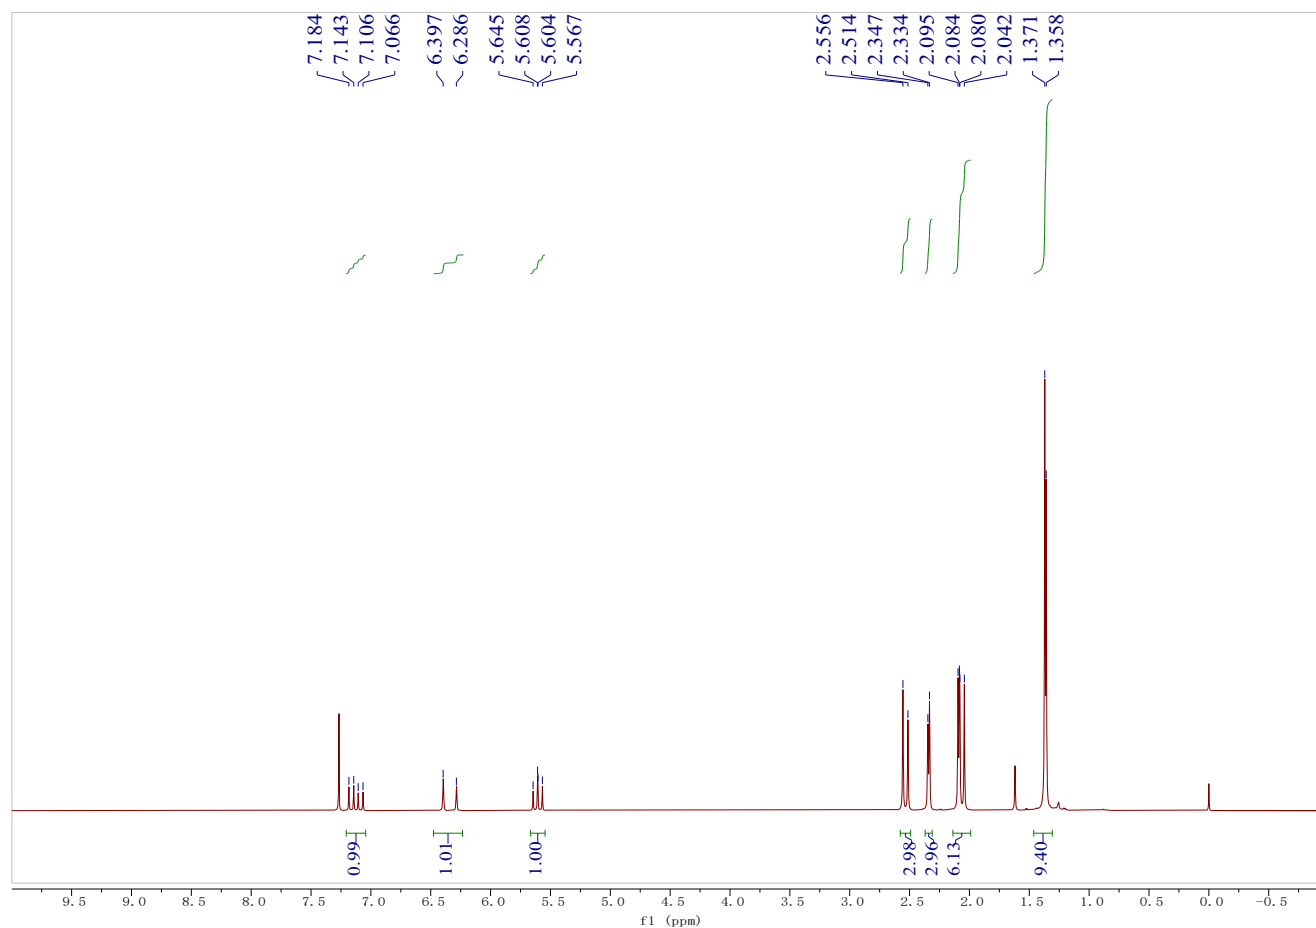

31, <sup>13</sup>C NMR, 101 MHz, CDCl<sub>3</sub>

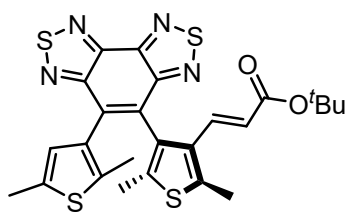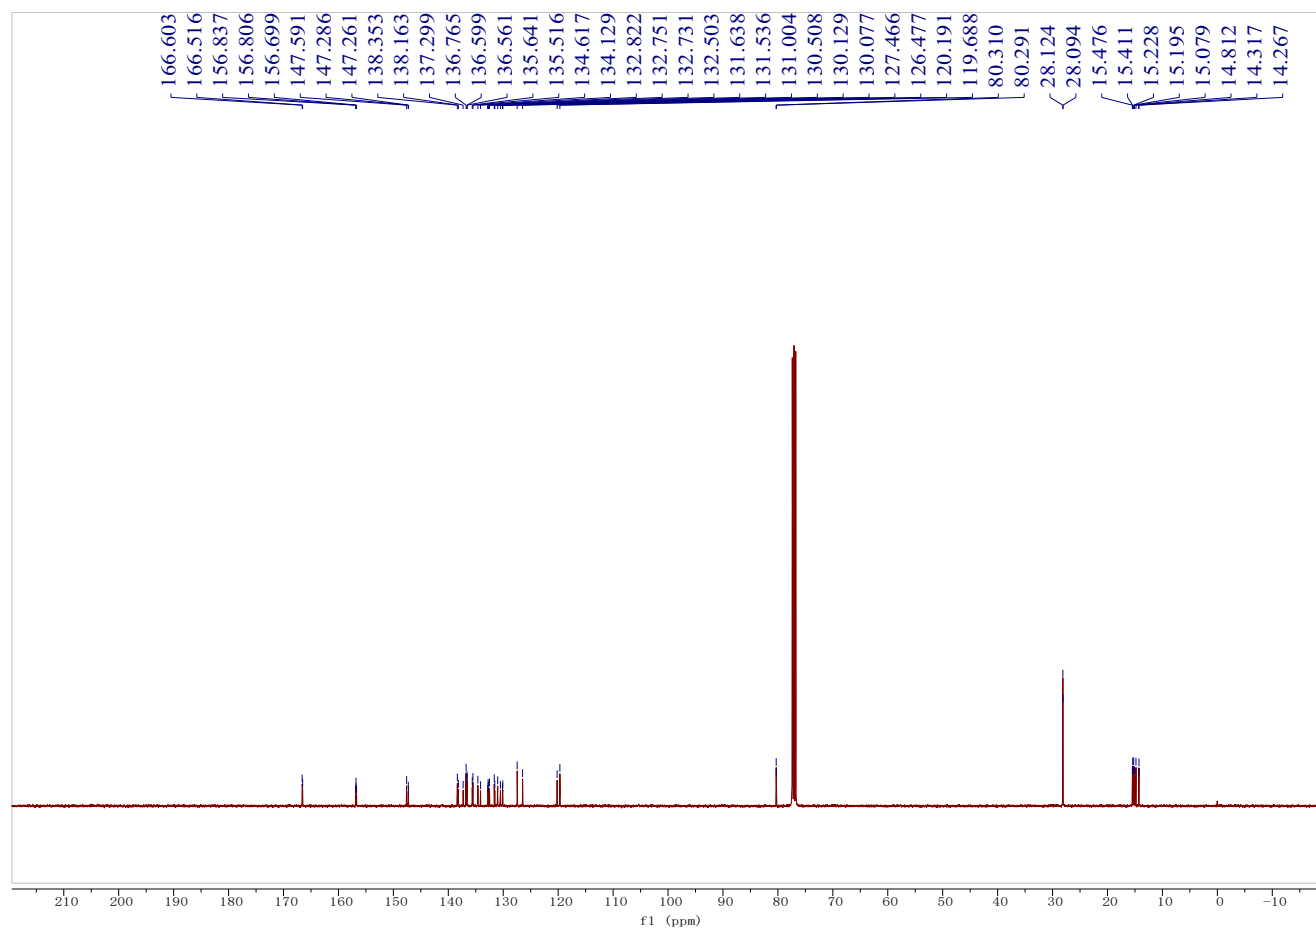

3m, <sup>1</sup>H NMR, 400 MHz, CDCl<sub>3</sub>

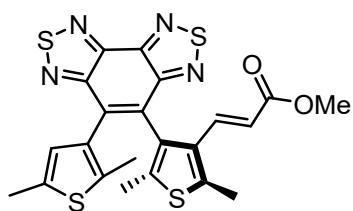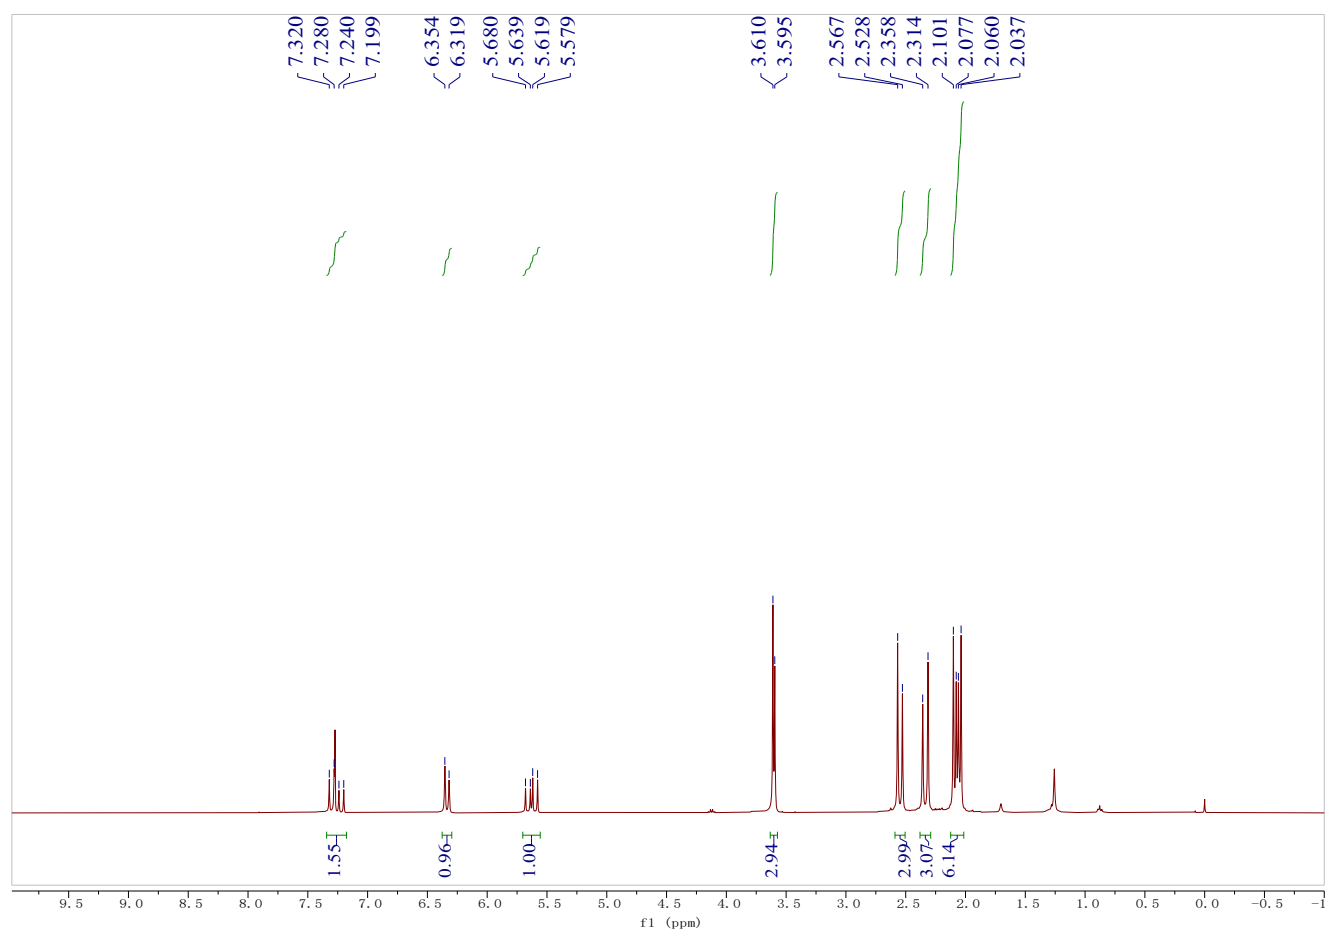



3m,  $^{13}\text{C}$  NMR, 101 MHz,  $\text{CDCl}_3$

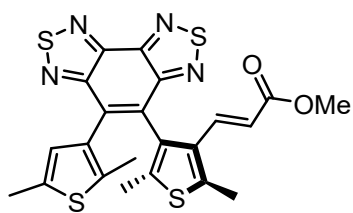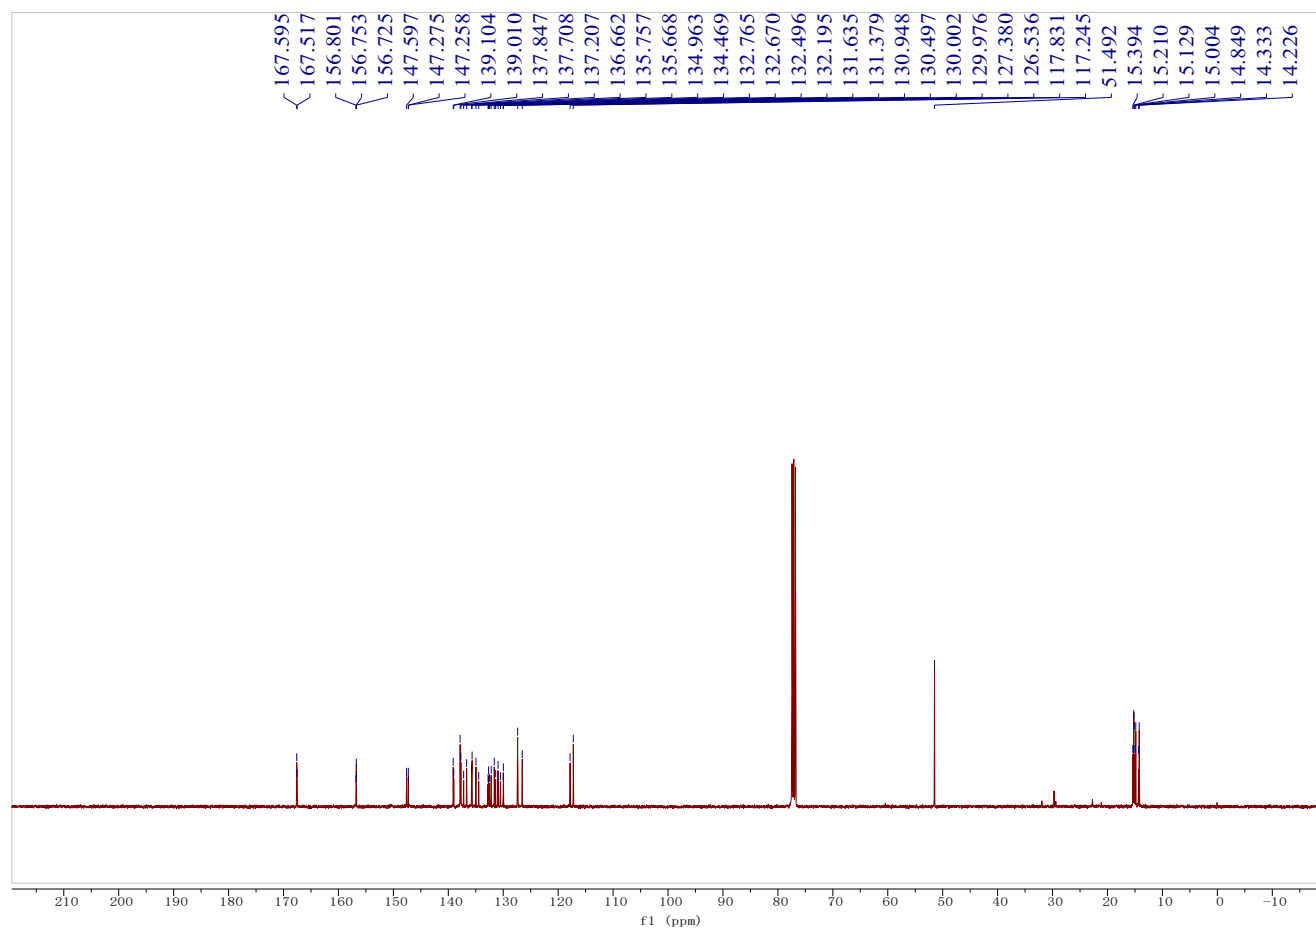

3n, <sup>1</sup>H NMR, 400 MHz, CDCl<sub>3</sub>

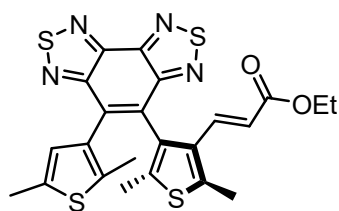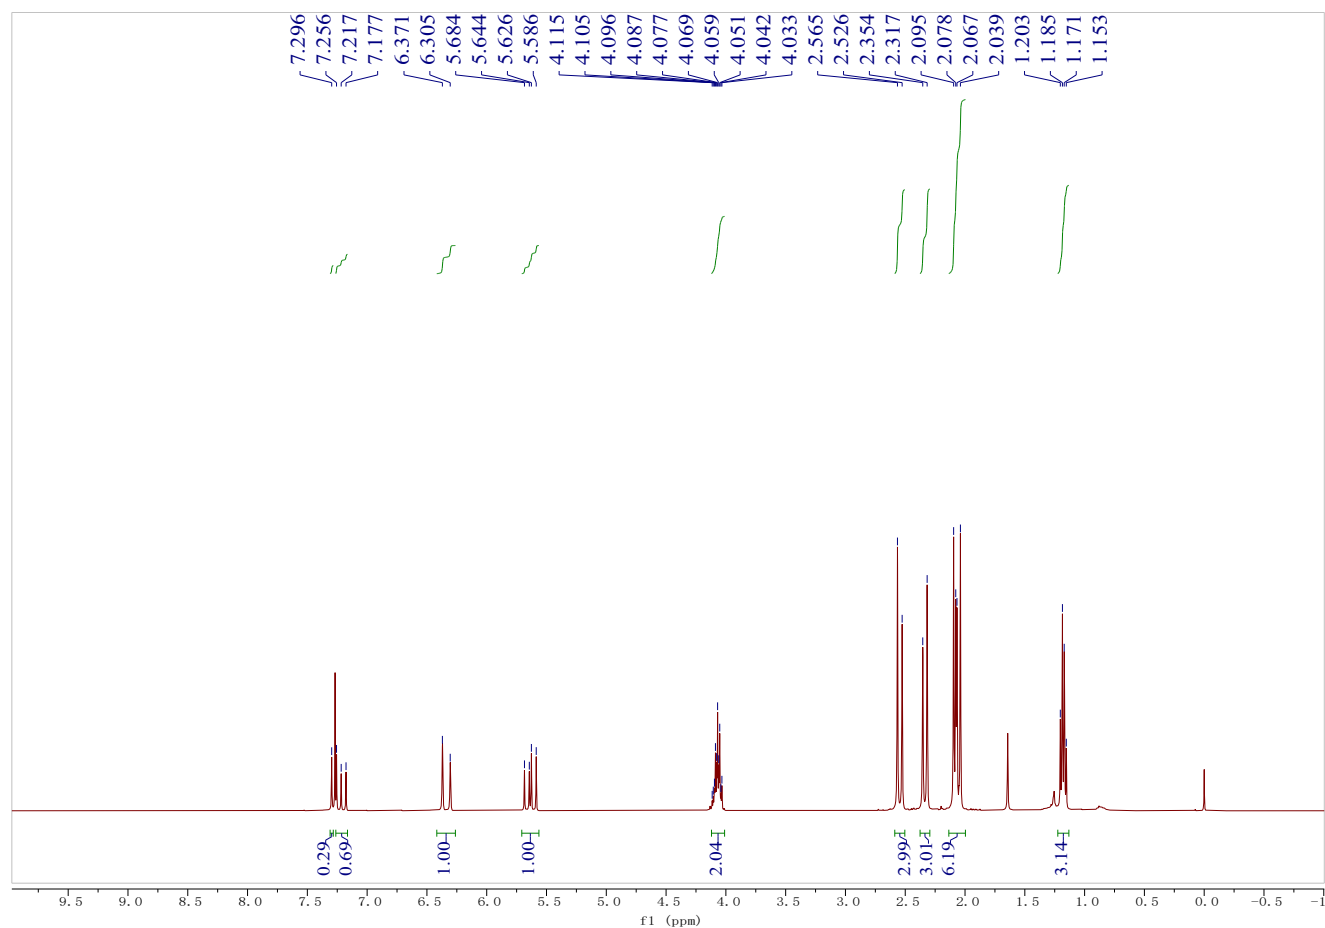

3n, <sup>13</sup>C NMR, 101 MHz, CDCl<sub>3</sub>

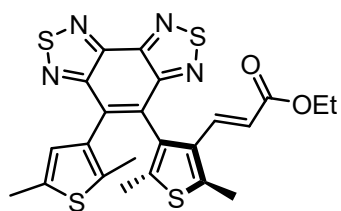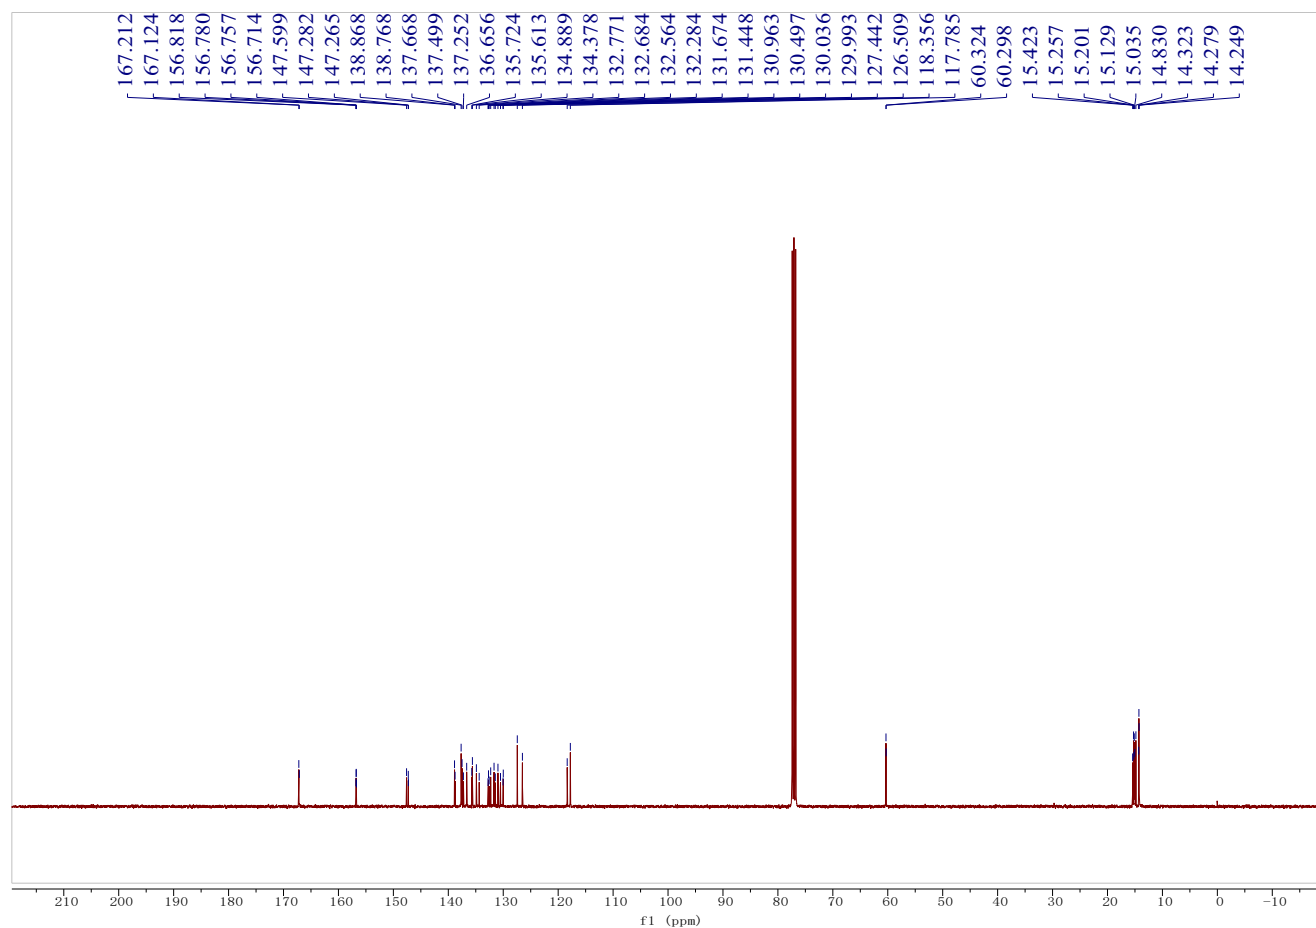

30, <sup>1</sup>H NMR, 400 MHz, CDCl<sub>3</sub>

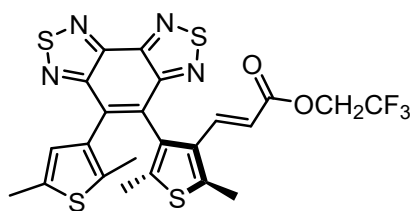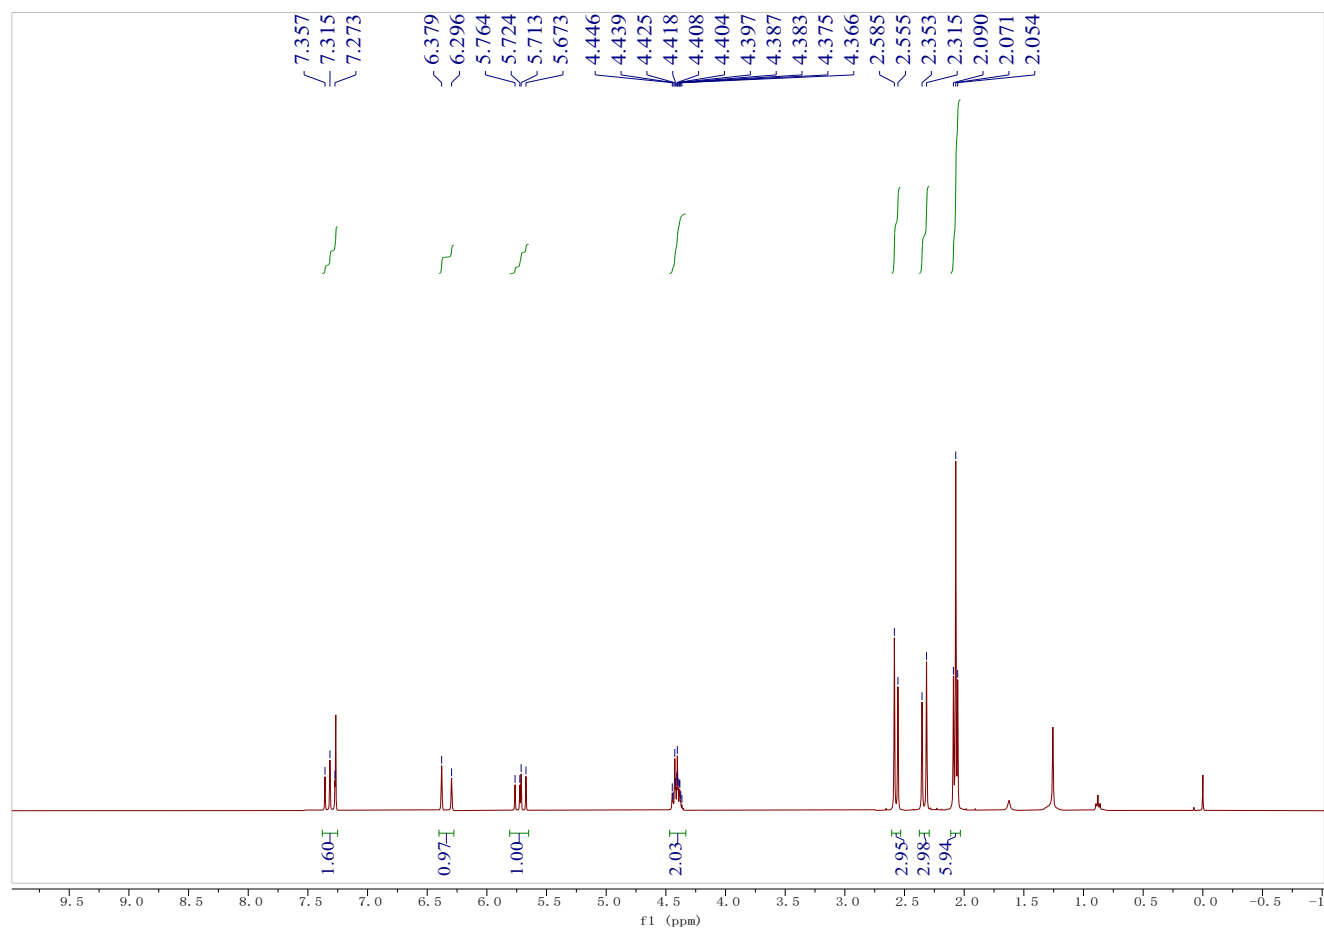

30,  $^{13}\text{C}$  NMR, 101 MHz,  $\text{CDCl}_3$

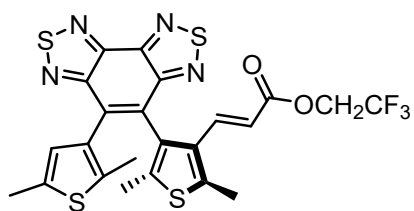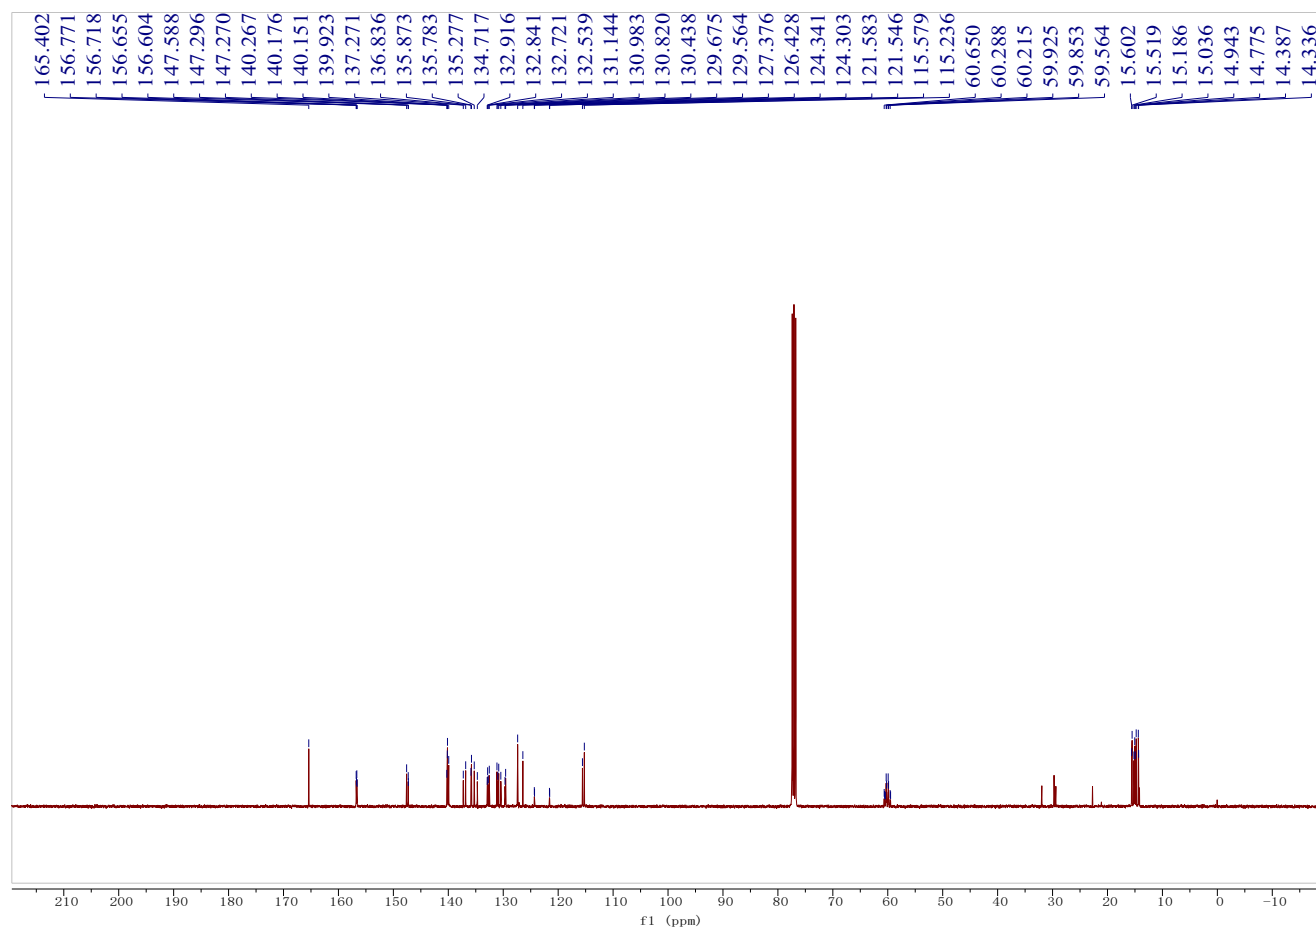

30,  $^{19}\text{F}$  NMR, 376 MHz,  $\text{CDCl}_3$

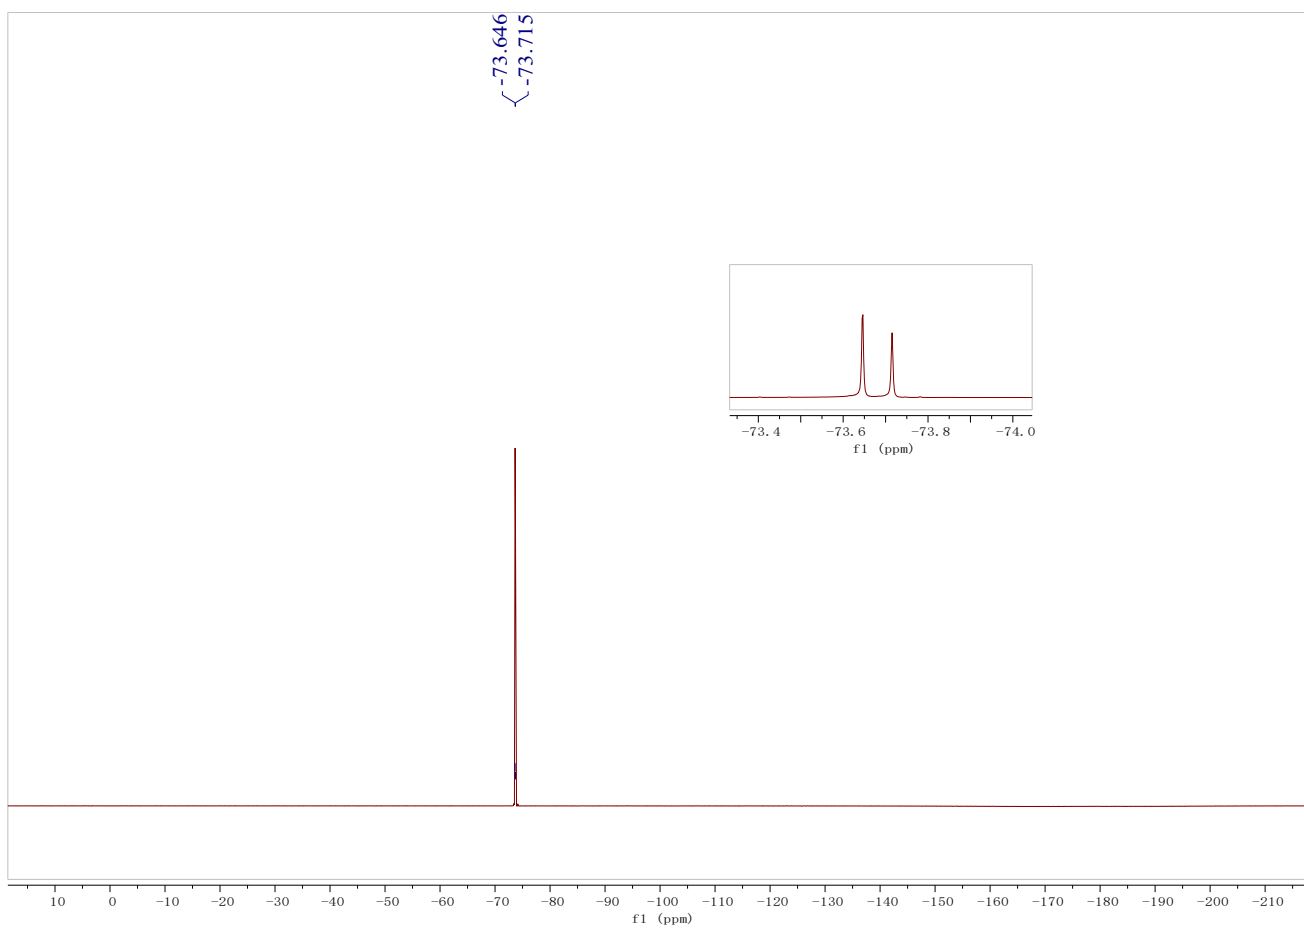

3p,  $^1\text{H}$  NMR, 400 MHz,  $\text{CDCl}_3$

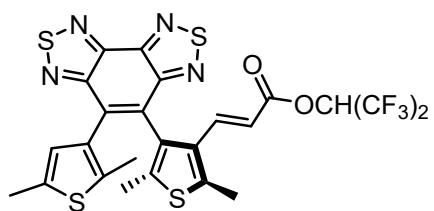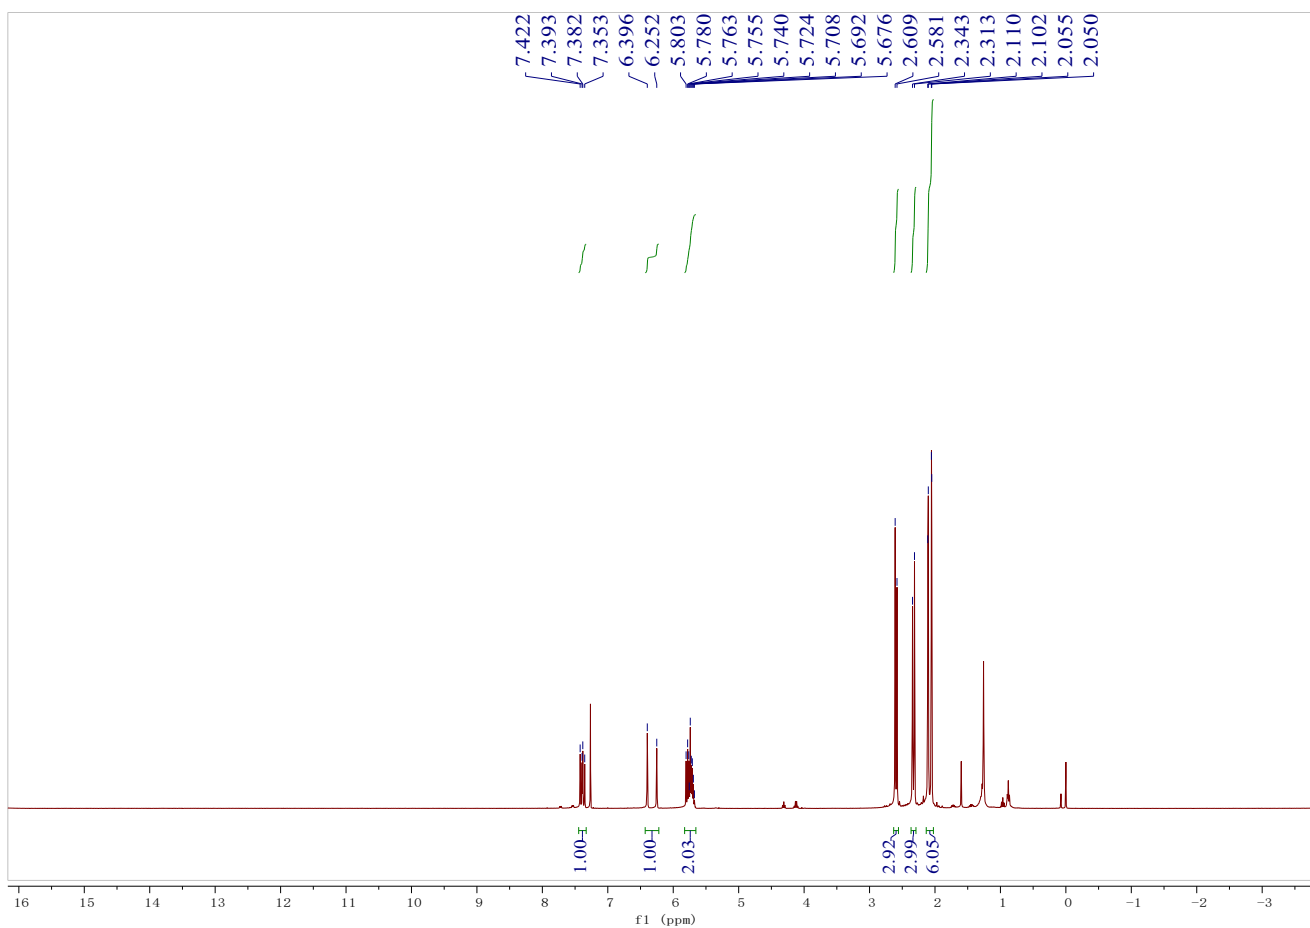

3p, <sup>13</sup>C NMR, 101 MHz, CDCl<sub>3</sub>

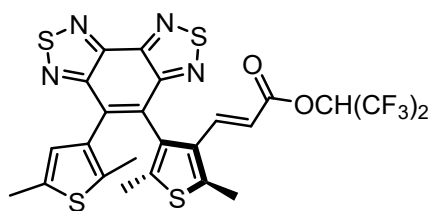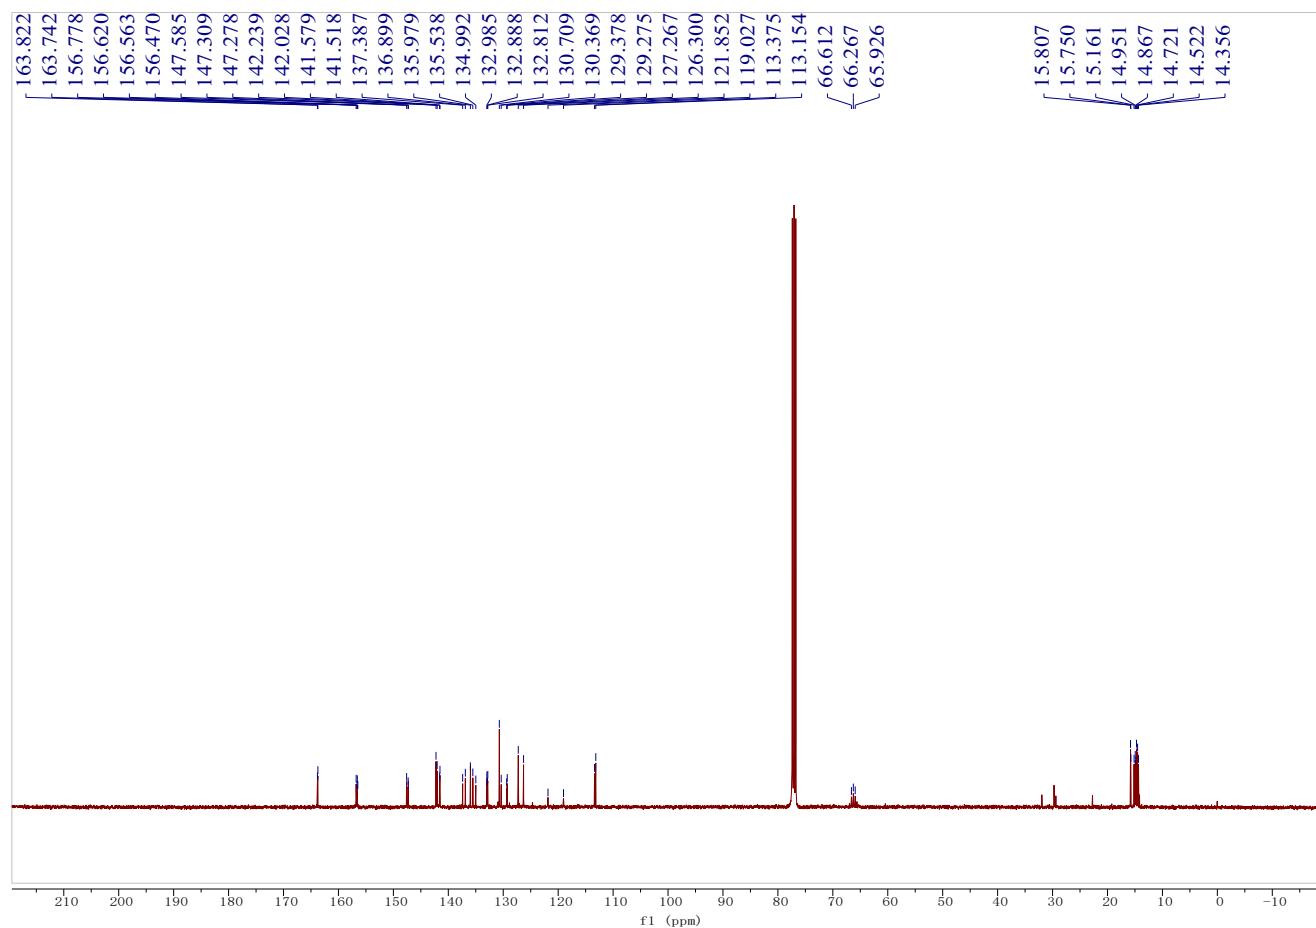



3p,  $^{19}\text{F}$  NMR, 376 MHz,  $\text{CDCl}_3$

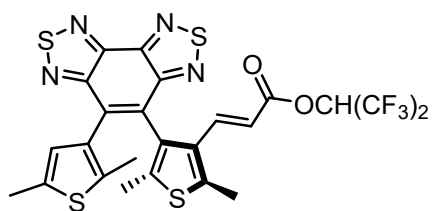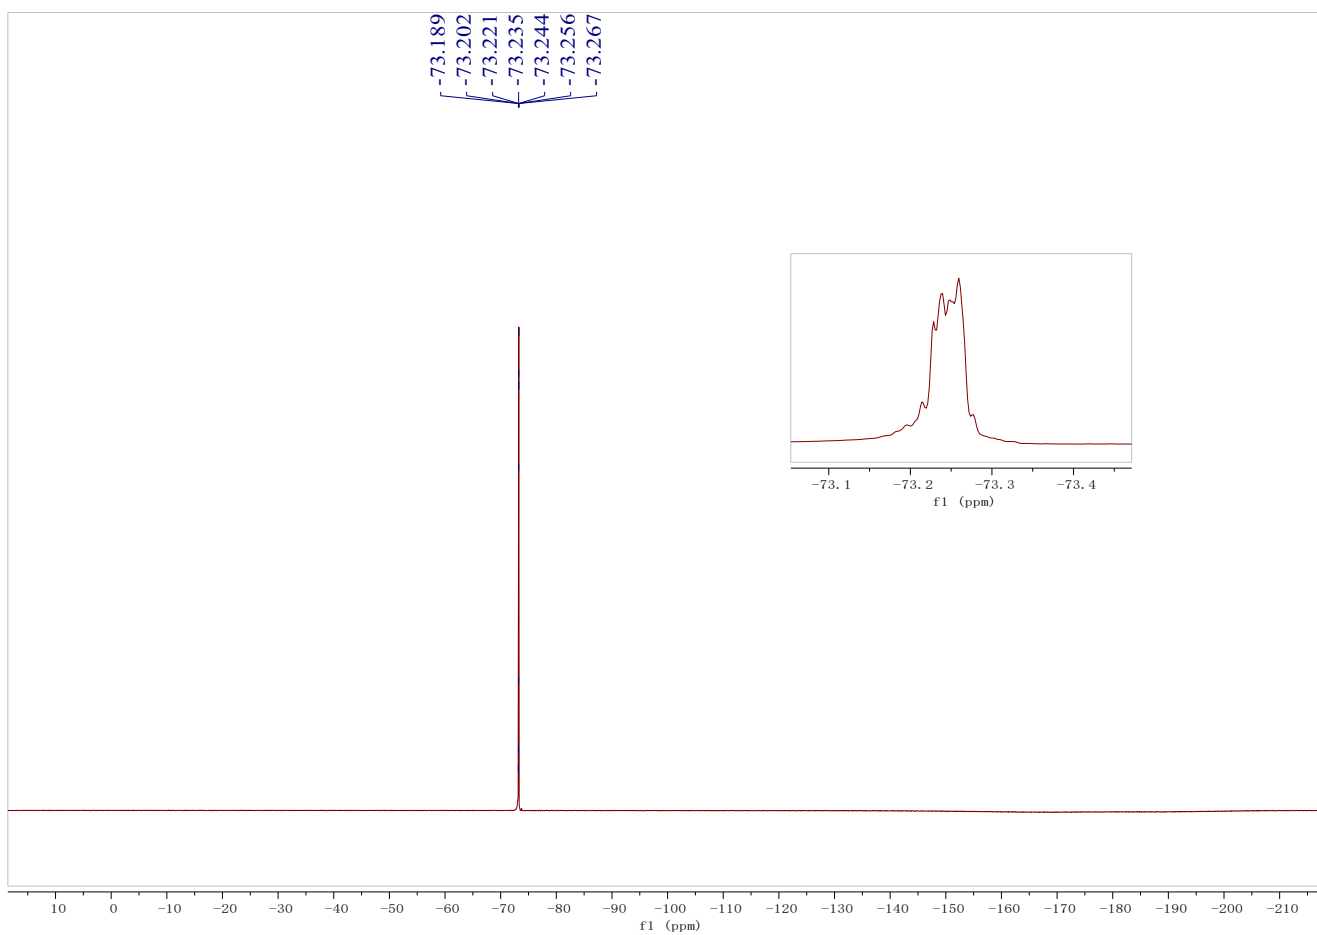

3q, <sup>1</sup>H NMR, 400 MHz, CDCl<sub>3</sub>

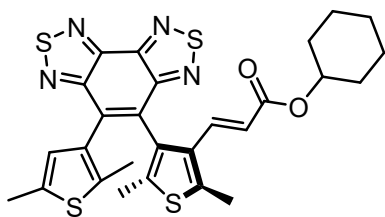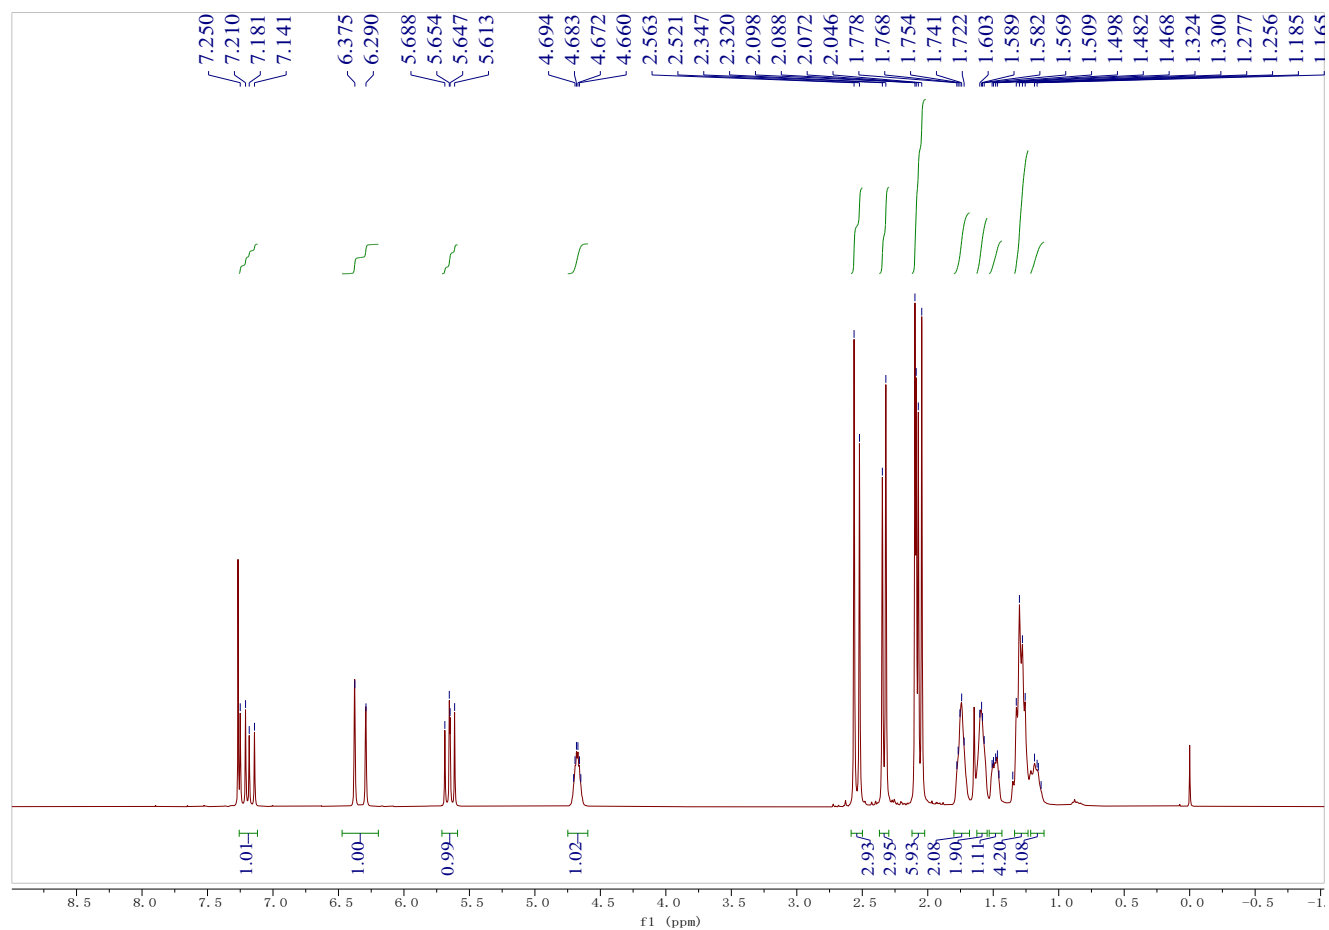

3q,  $^{13}\text{C}$  NMR, 101 MHz,  $\text{CDCl}_3$

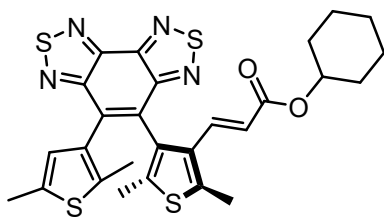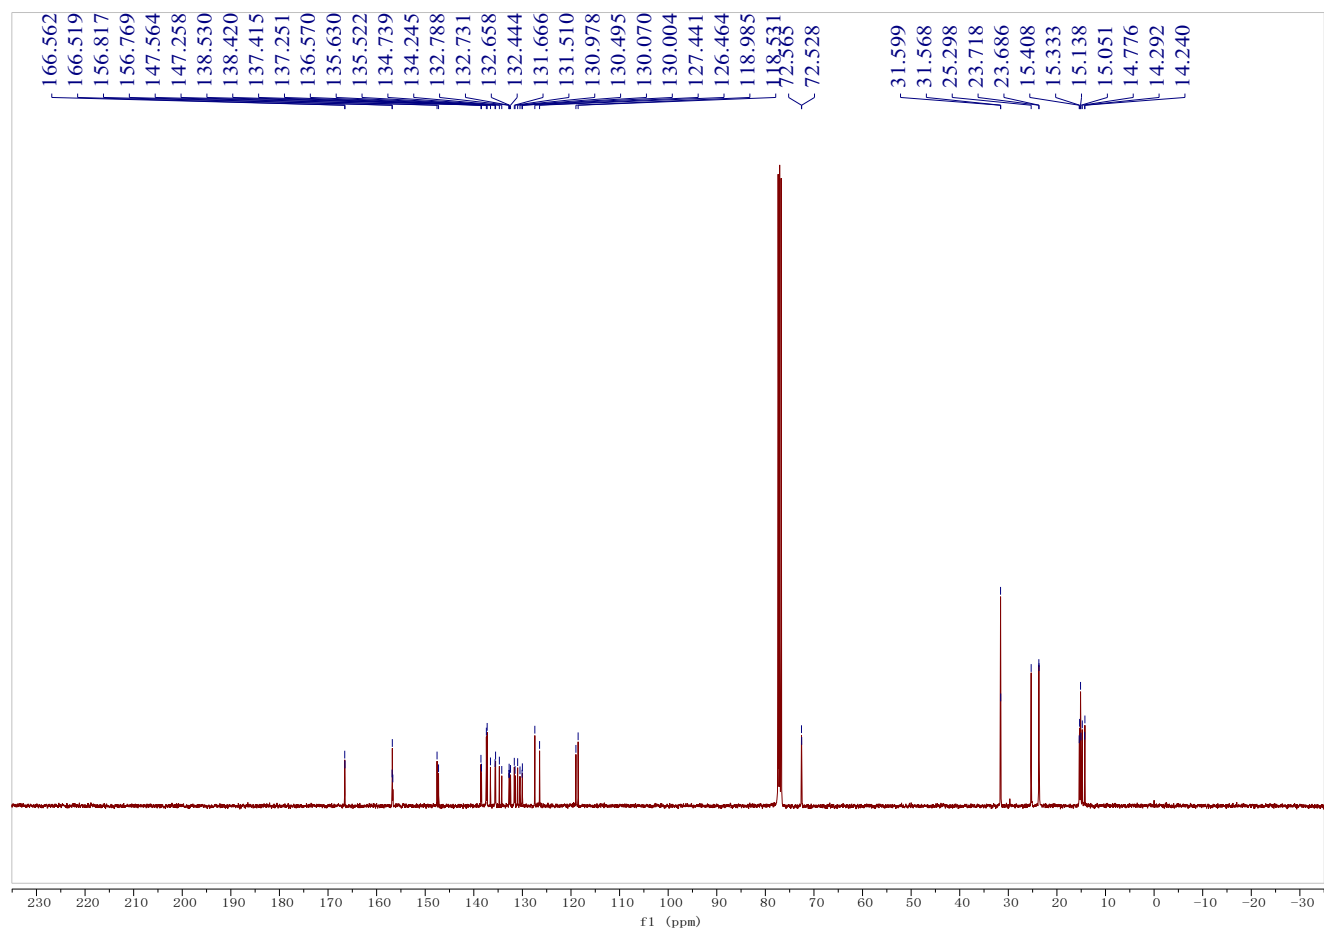

3r, <sup>1</sup>H NMR, 400 MHz, CDCl<sub>3</sub>

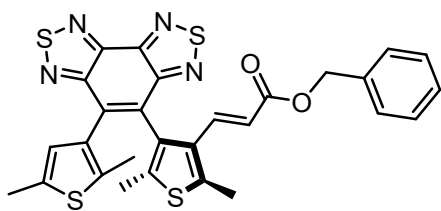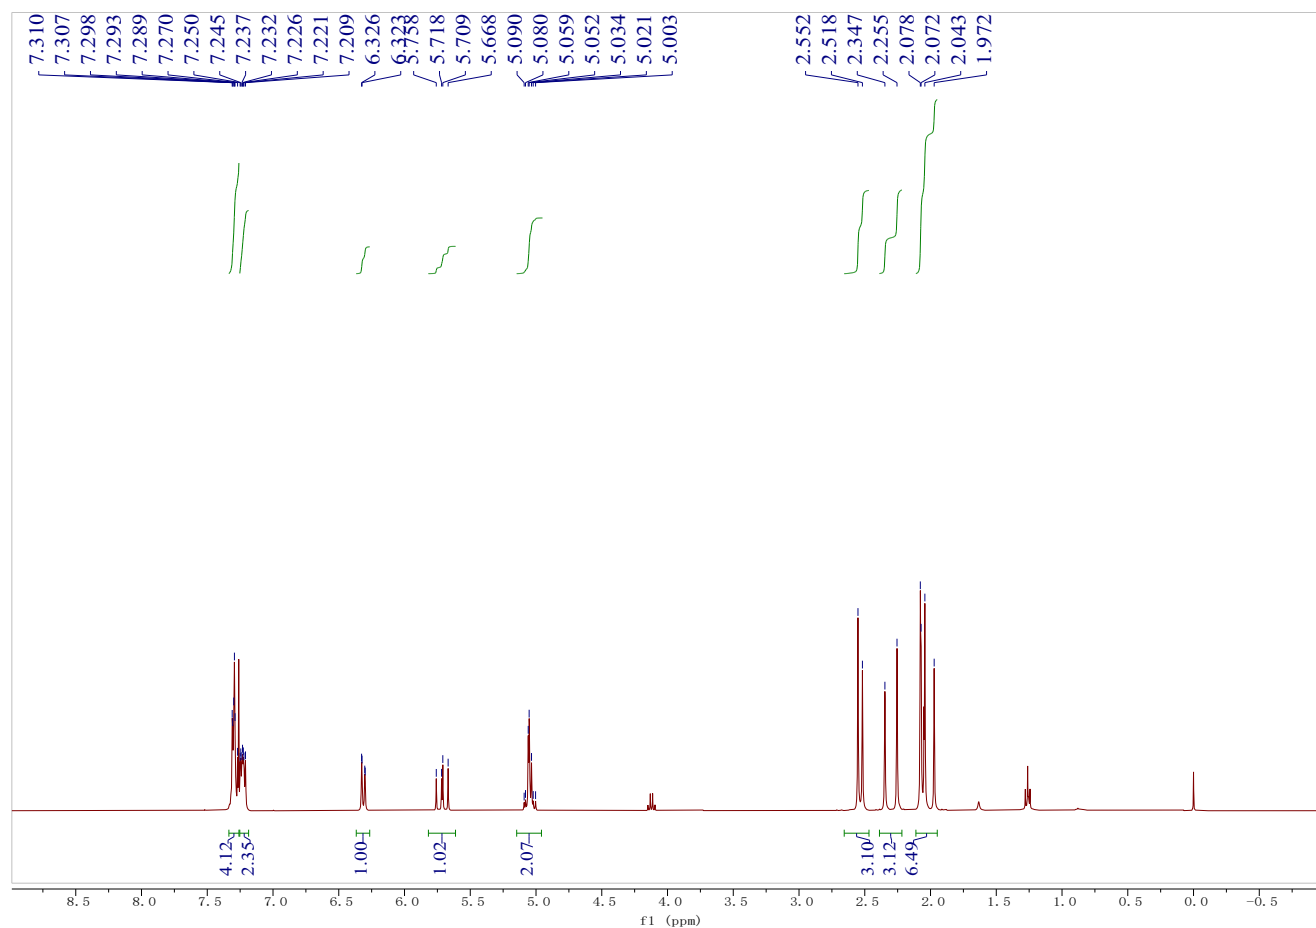

3r, <sup>13</sup>C NMR, 101 MHz, CDCl<sub>3</sub>

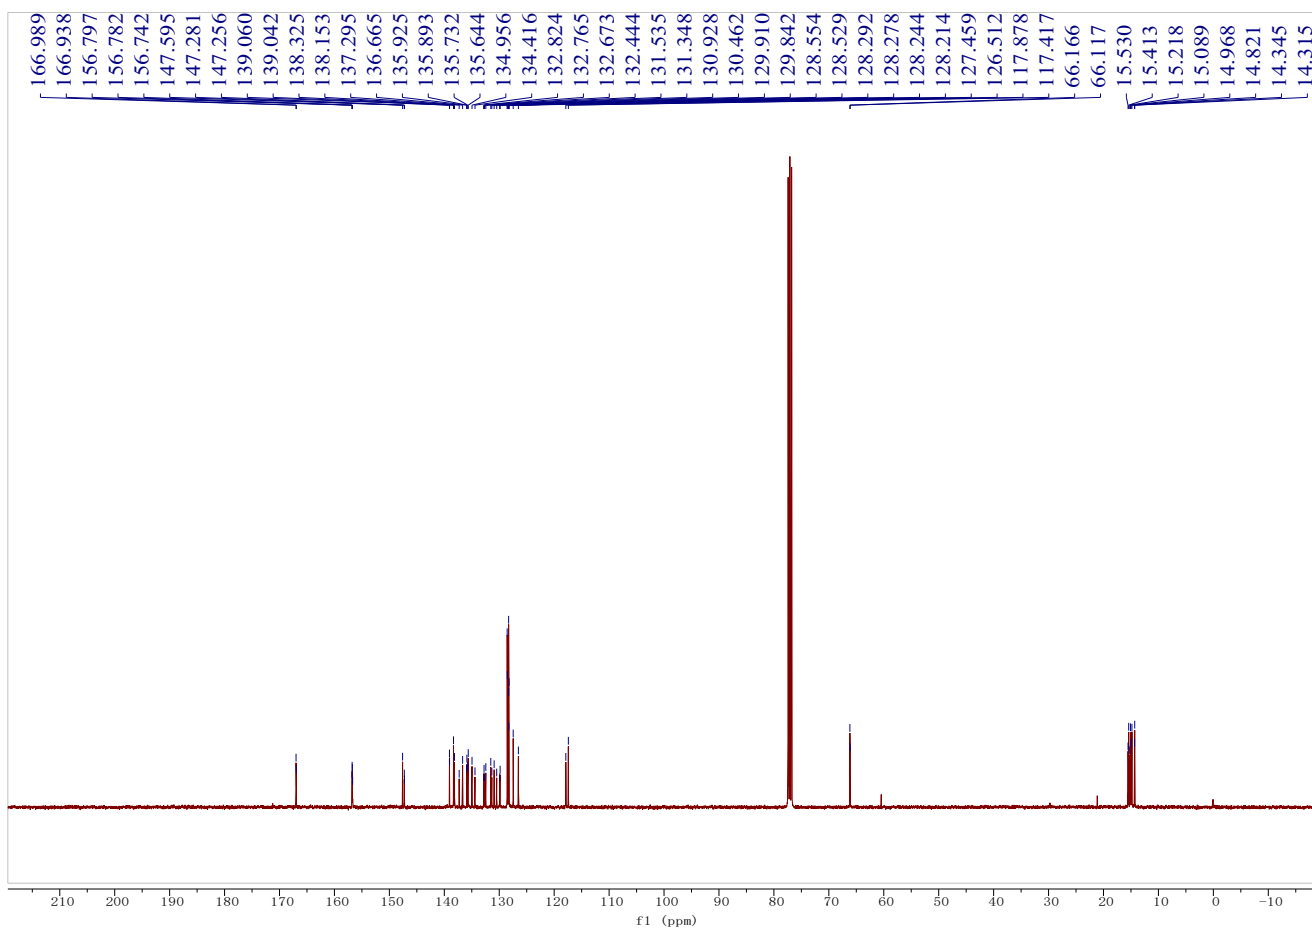

3s, <sup>1</sup>H NMR, 400 MHz, CDCl<sub>3</sub>

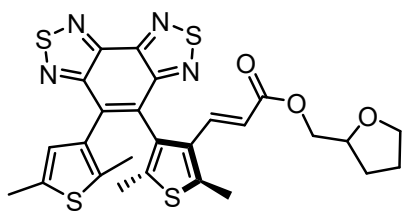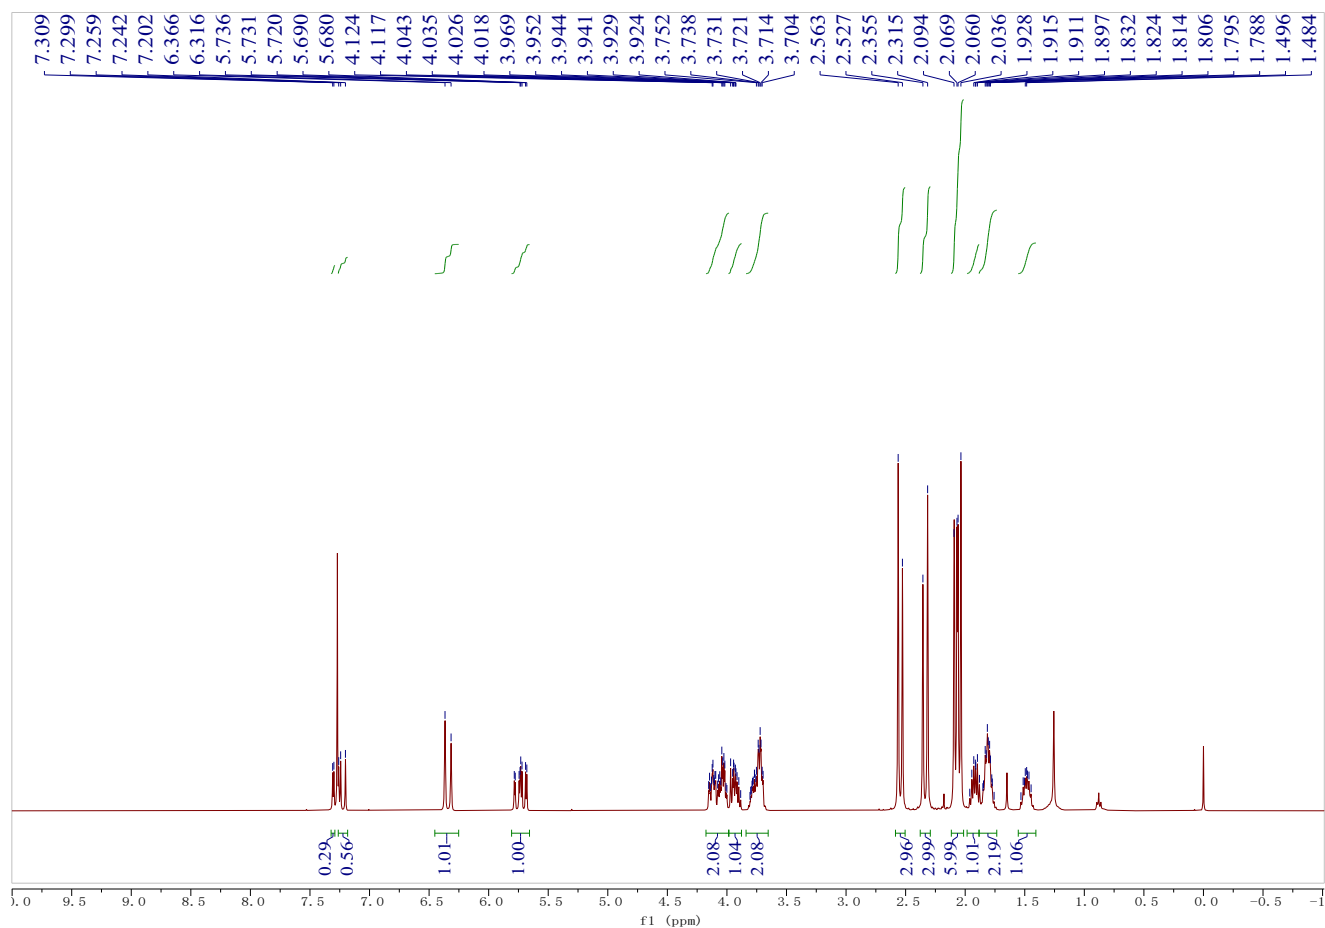

3s, <sup>13</sup>C NMR, 101 MHz, CDCl<sub>3</sub>

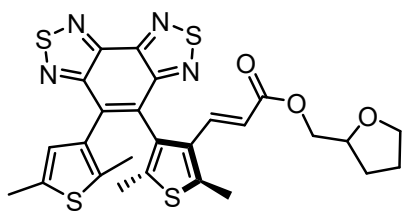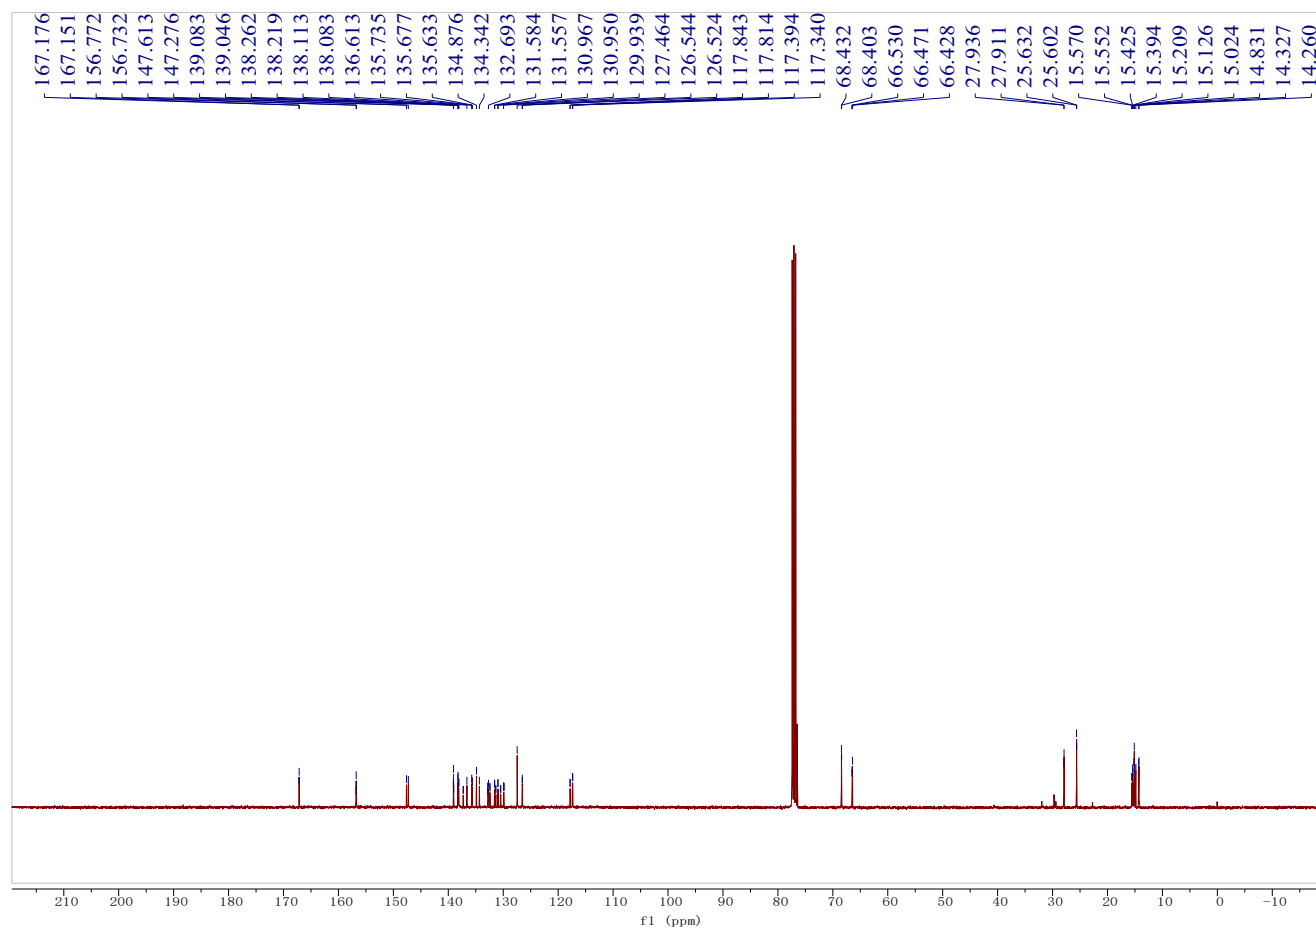

3t, <sup>1</sup>H NMR, 400 MHz, CDCl<sub>3</sub>

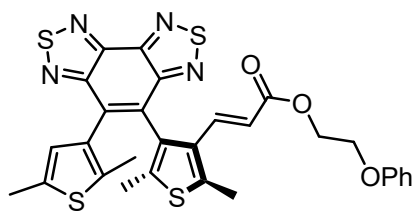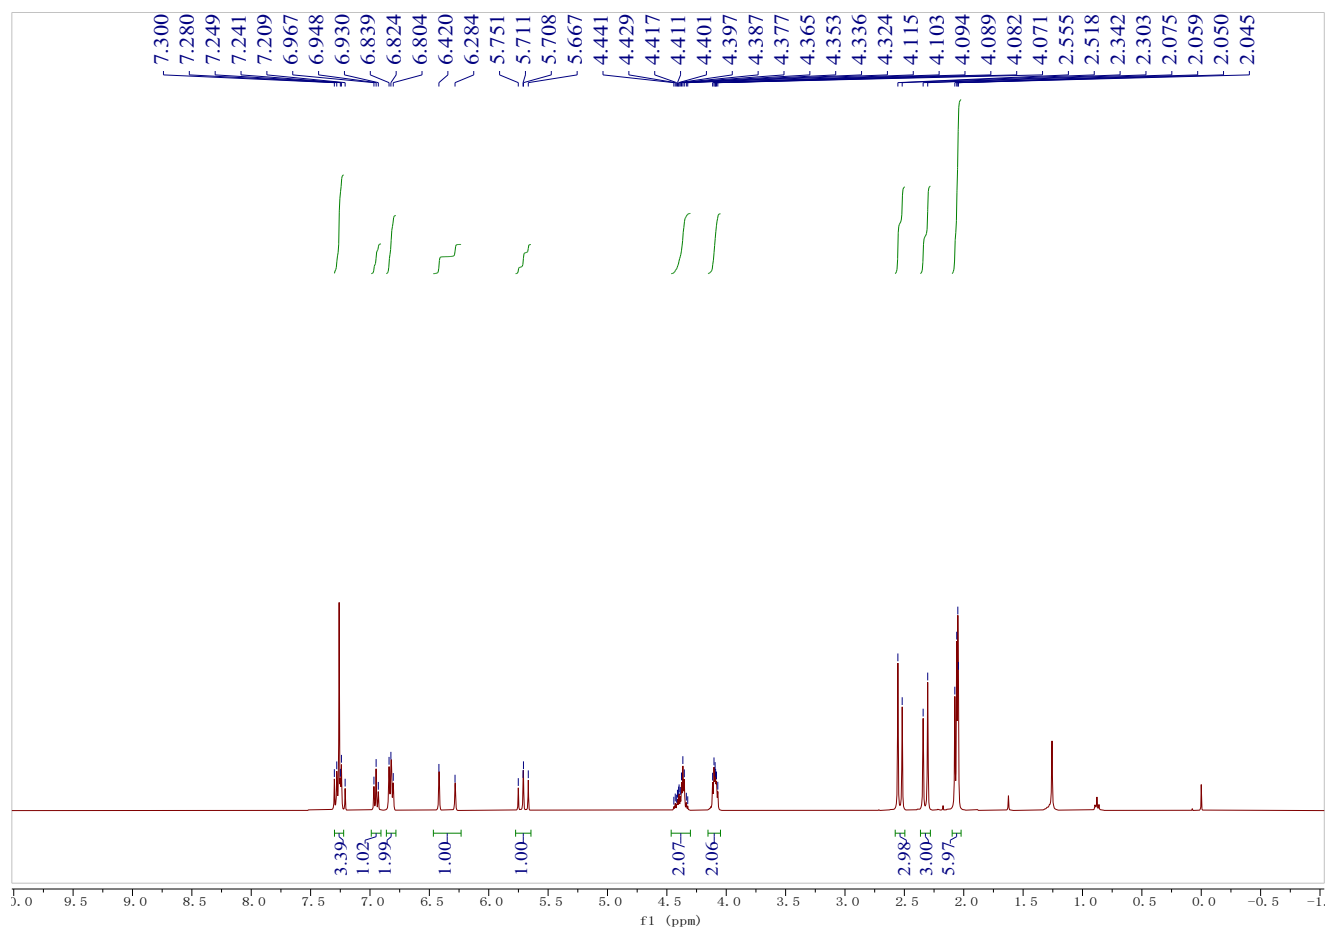



3t, <sup>13</sup>C NMR, 101 MHz, CDCl<sub>3</sub>

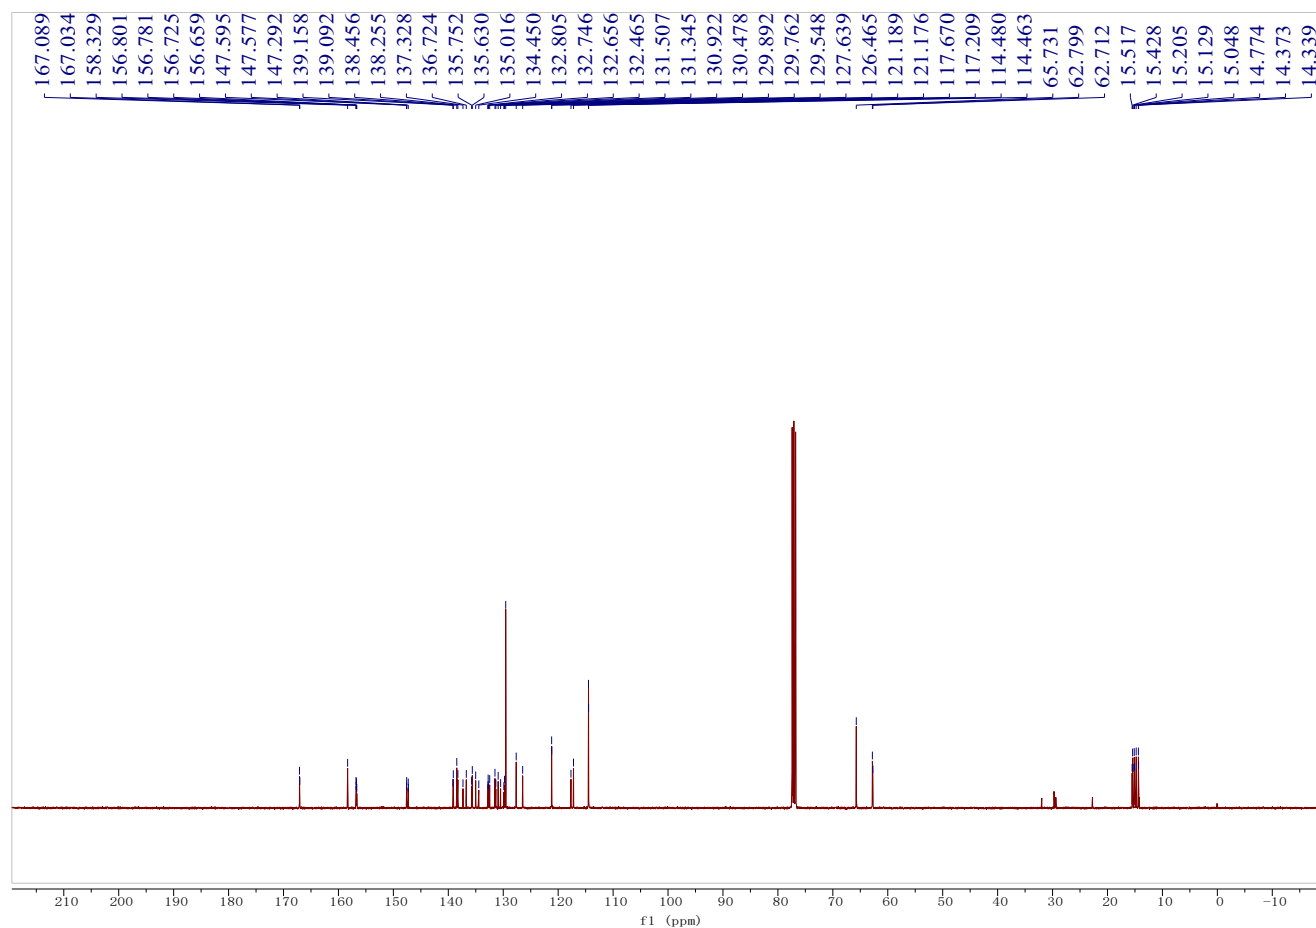

3u, <sup>1</sup>H NMR, 400 MHz, CDCl<sub>3</sub>

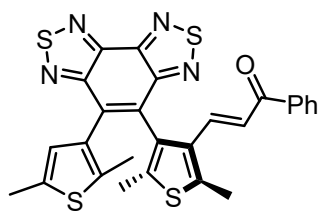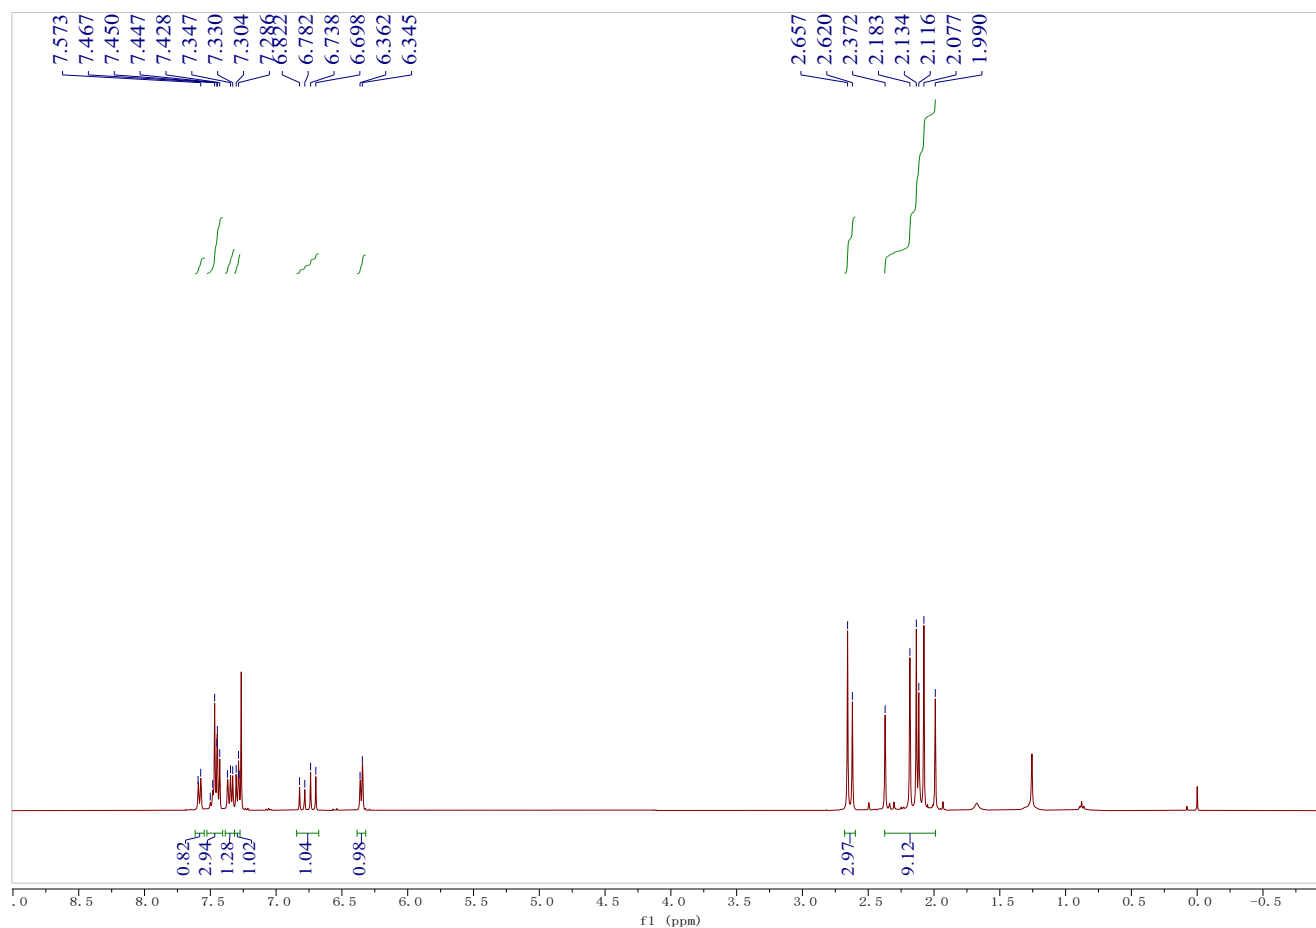

3u, <sup>13</sup>C NMR, 101 MHz, CDCl<sub>3</sub>

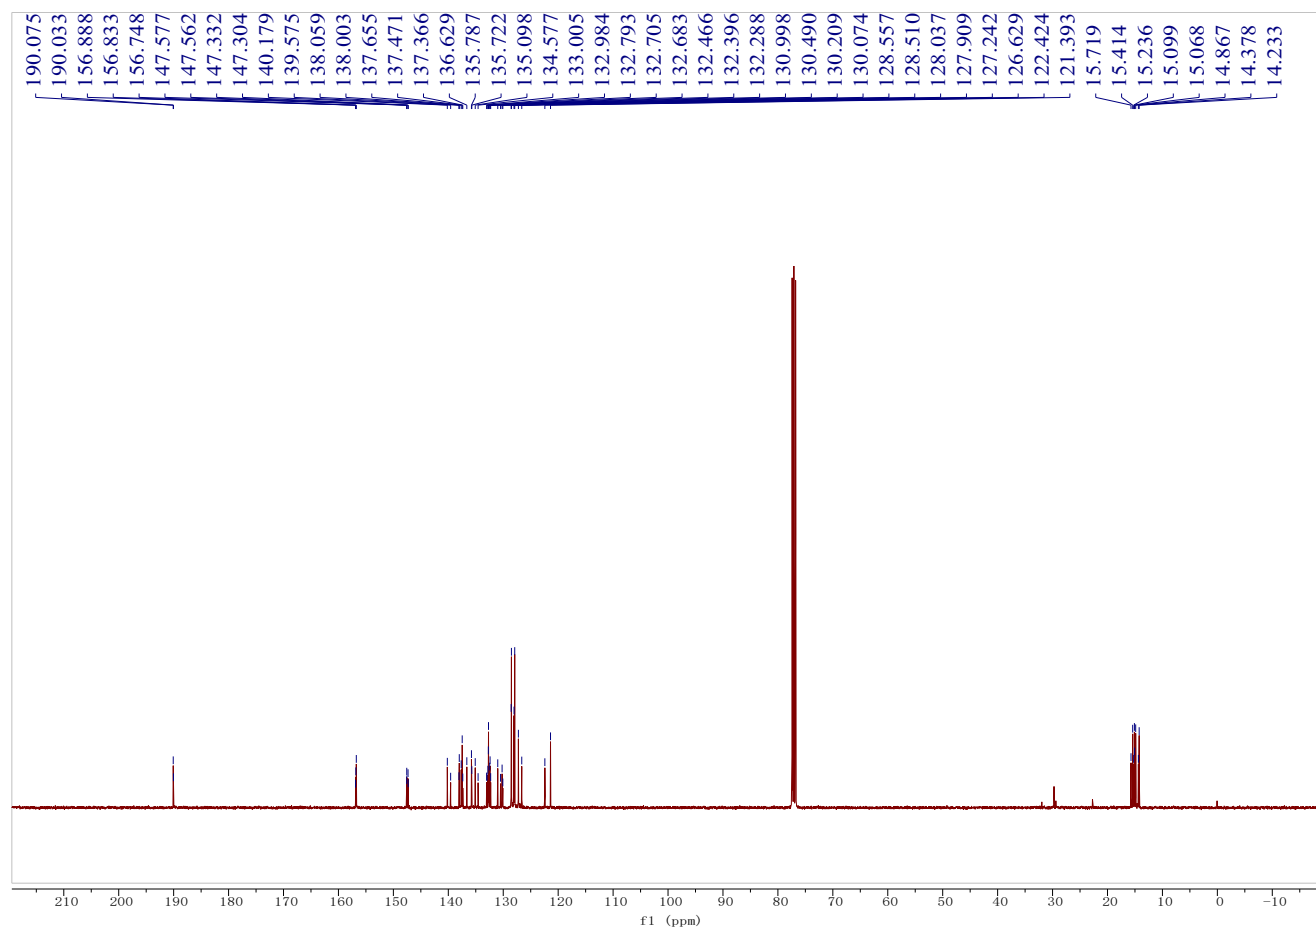

3v, <sup>1</sup>H NMR, 400 MHz, CDCl<sub>3</sub>

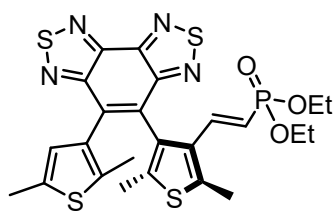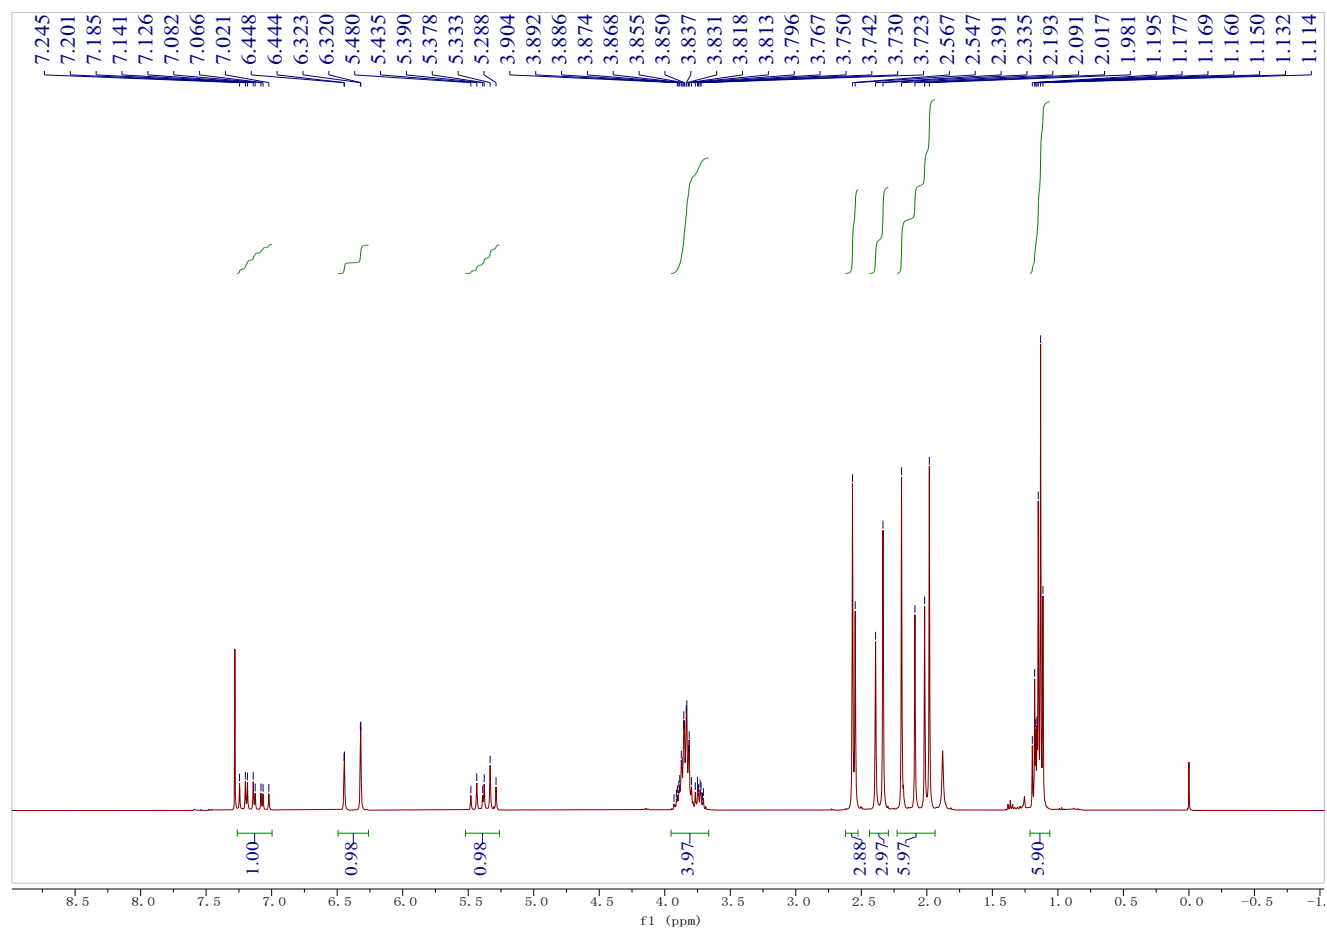

3v,  $^{13}\text{C}$  NMR, 101 MHz,  $\text{CDCl}_3$

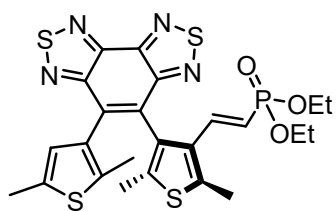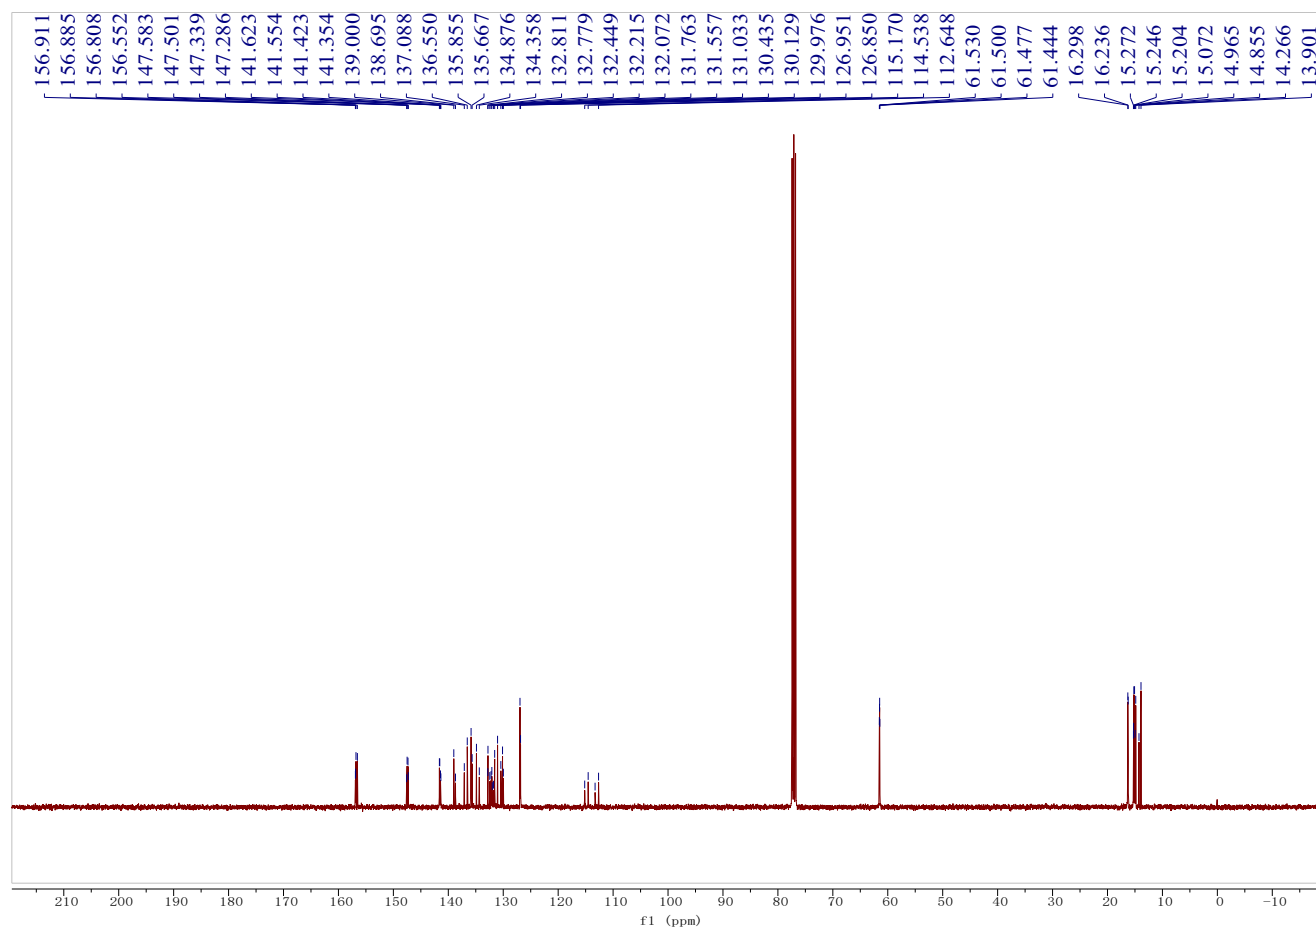

3v,  $^{31}\text{P}$  NMR, 162 MHz,  $\text{CDCl}_3$

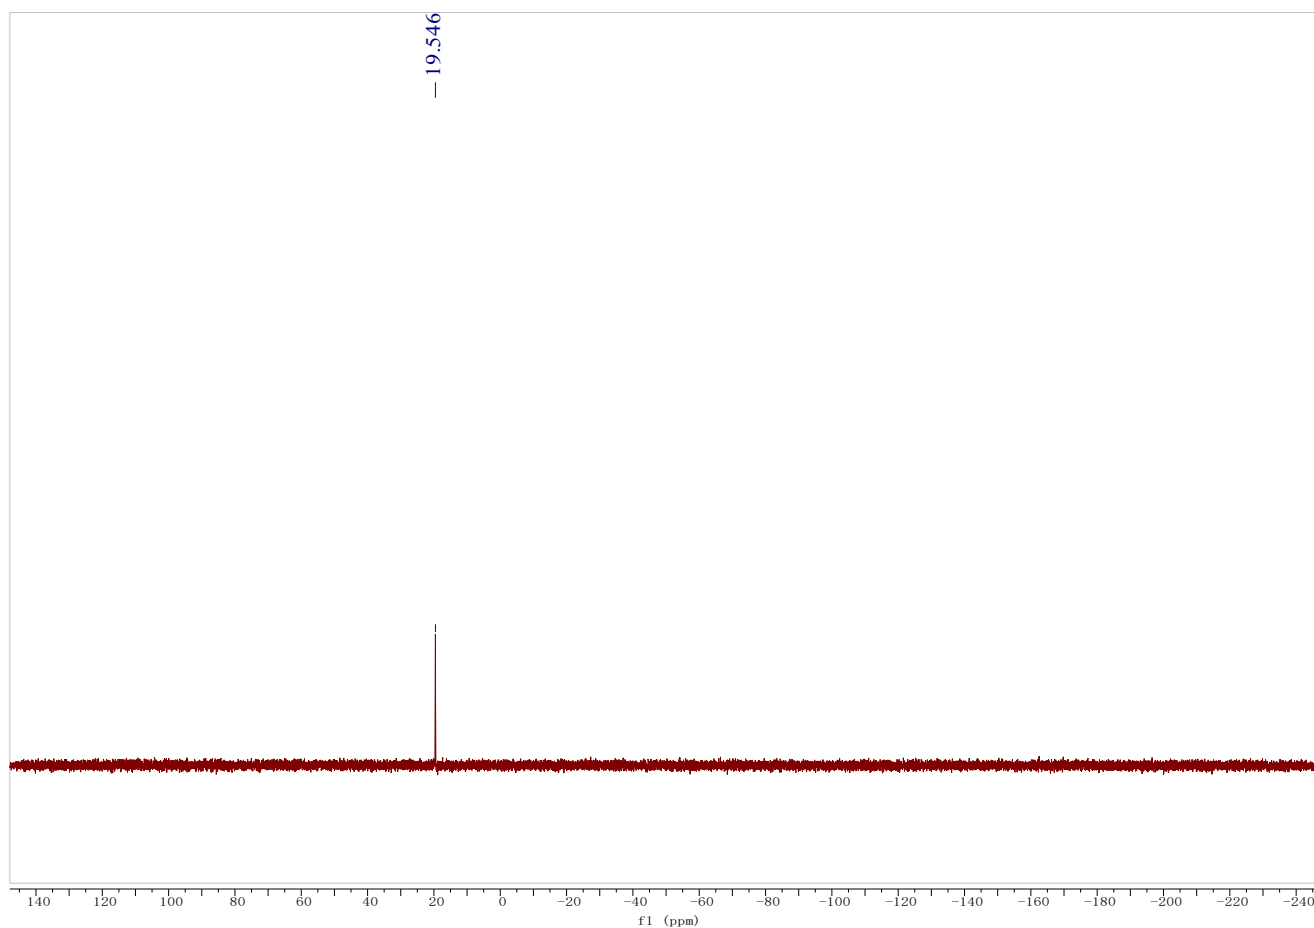

3w, <sup>1</sup>H NMR, 400 MHz, CDCl<sub>3</sub>

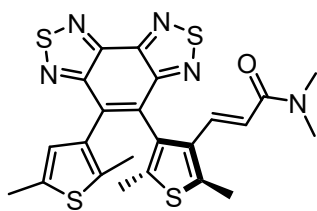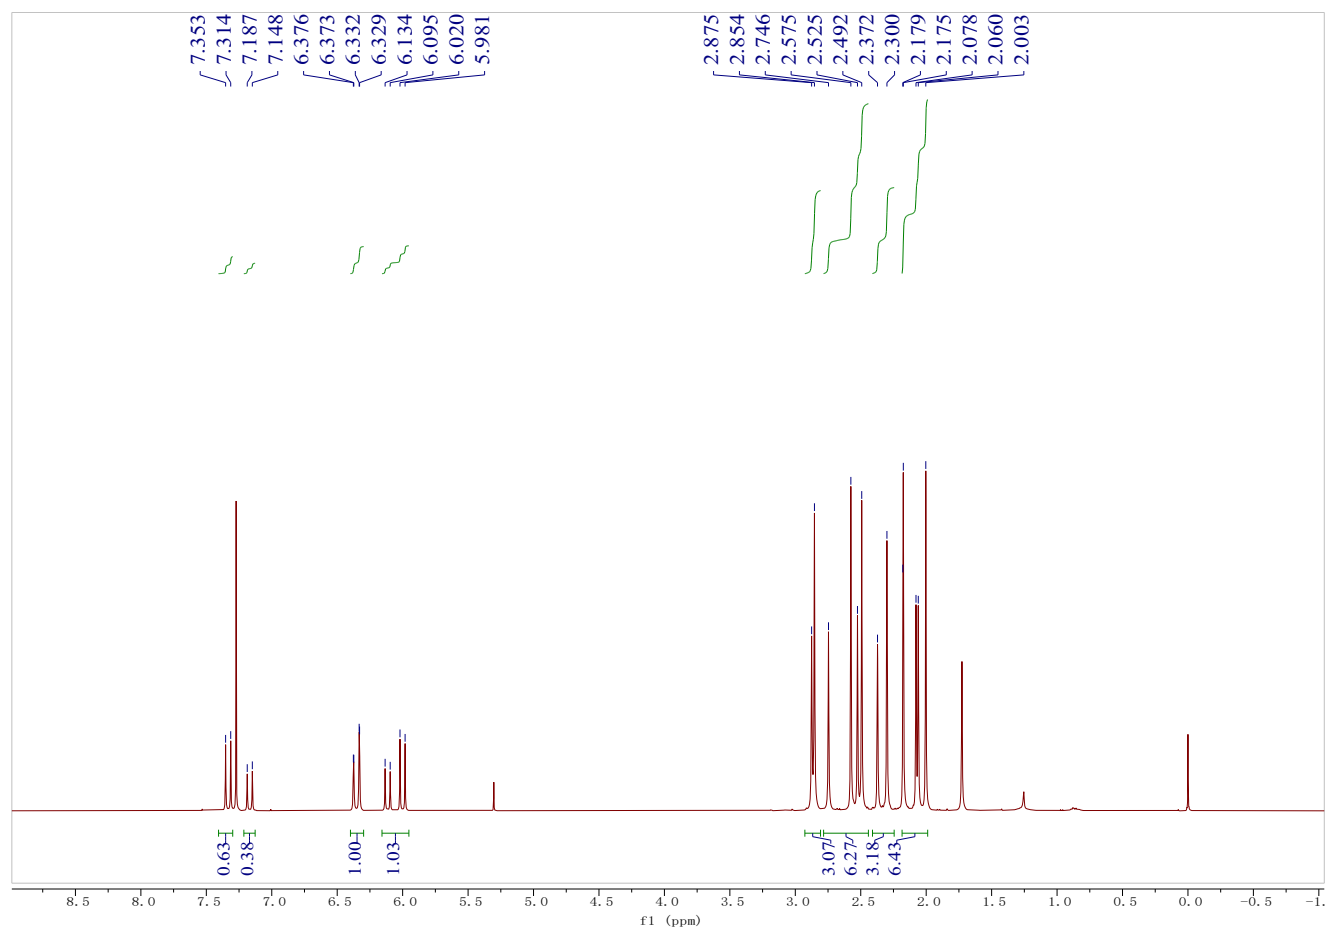

3w, <sup>13</sup>C NMR, 101 MHz, CDCl<sub>3</sub>

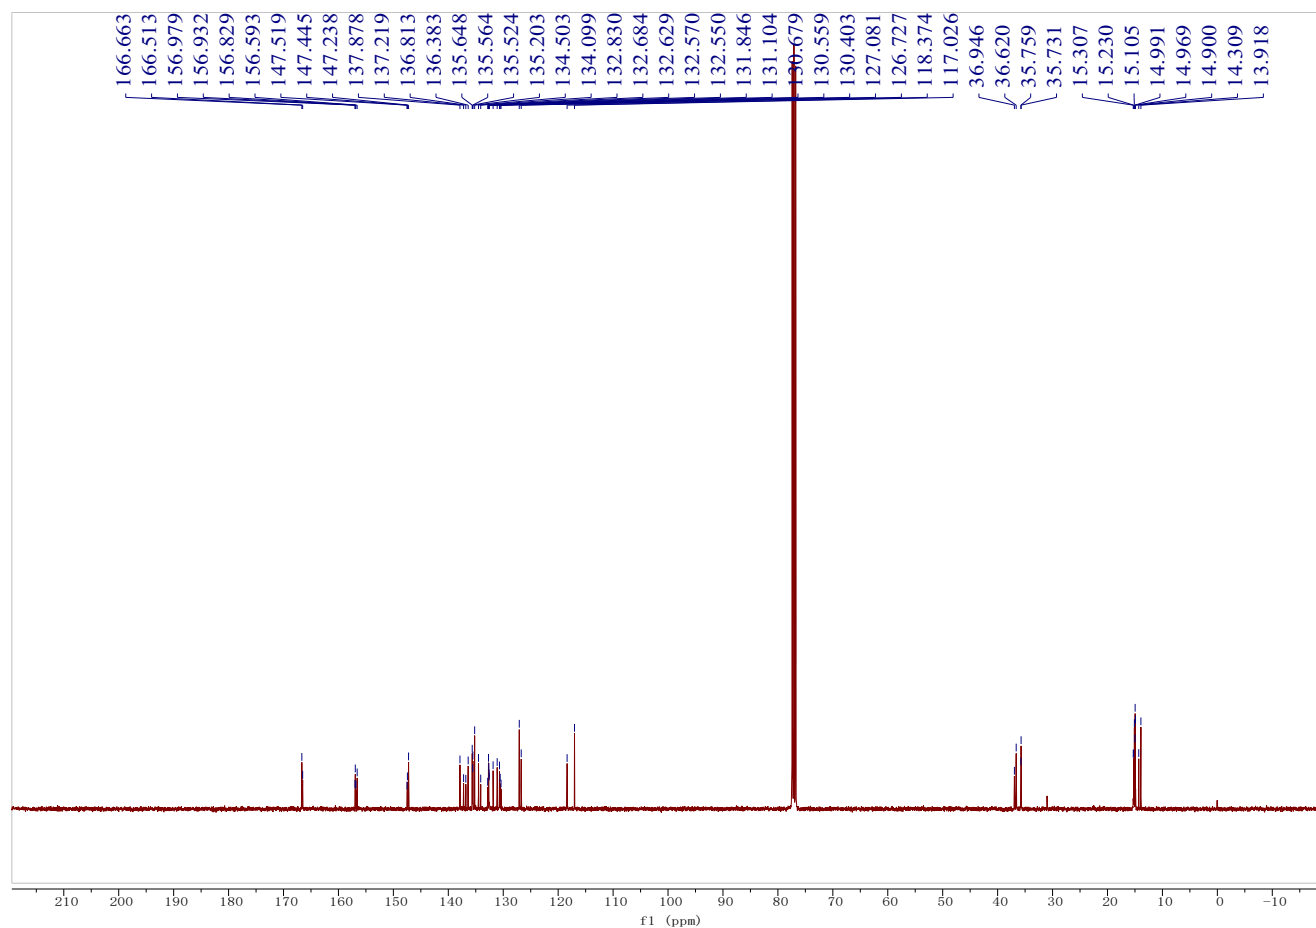



3x, <sup>1</sup>H NMR, 400 MHz, CDCl<sub>3</sub>

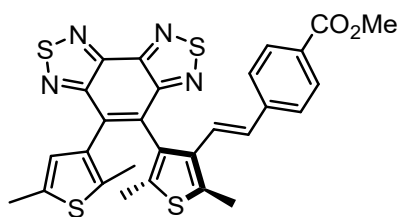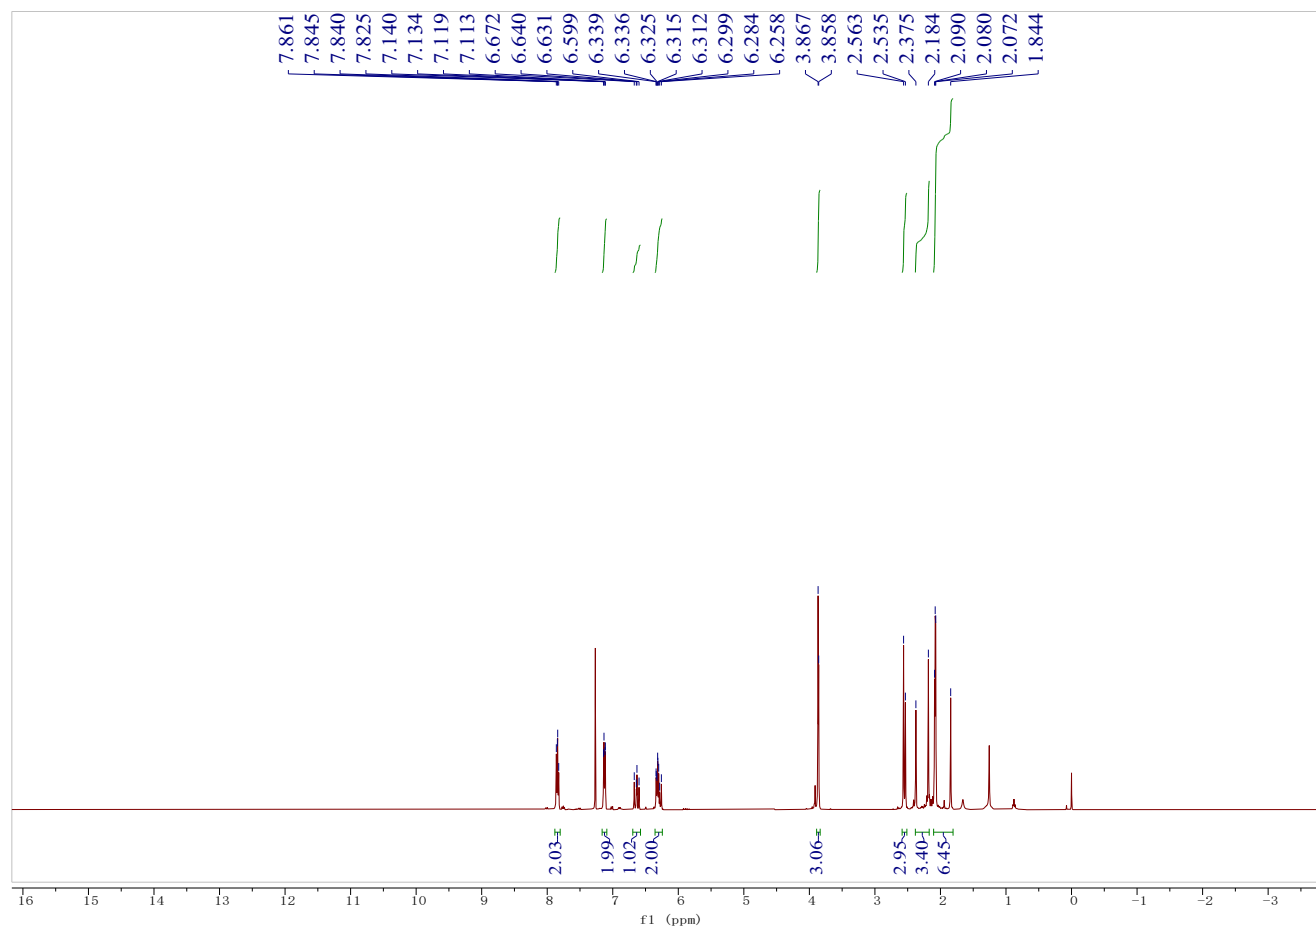

3x,  $^{13}\text{C}$  NMR, 101 MHz,  $\text{CDCl}_3$

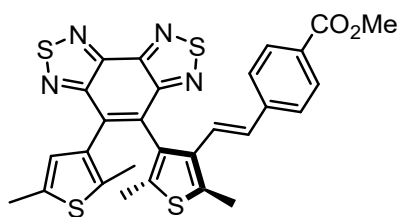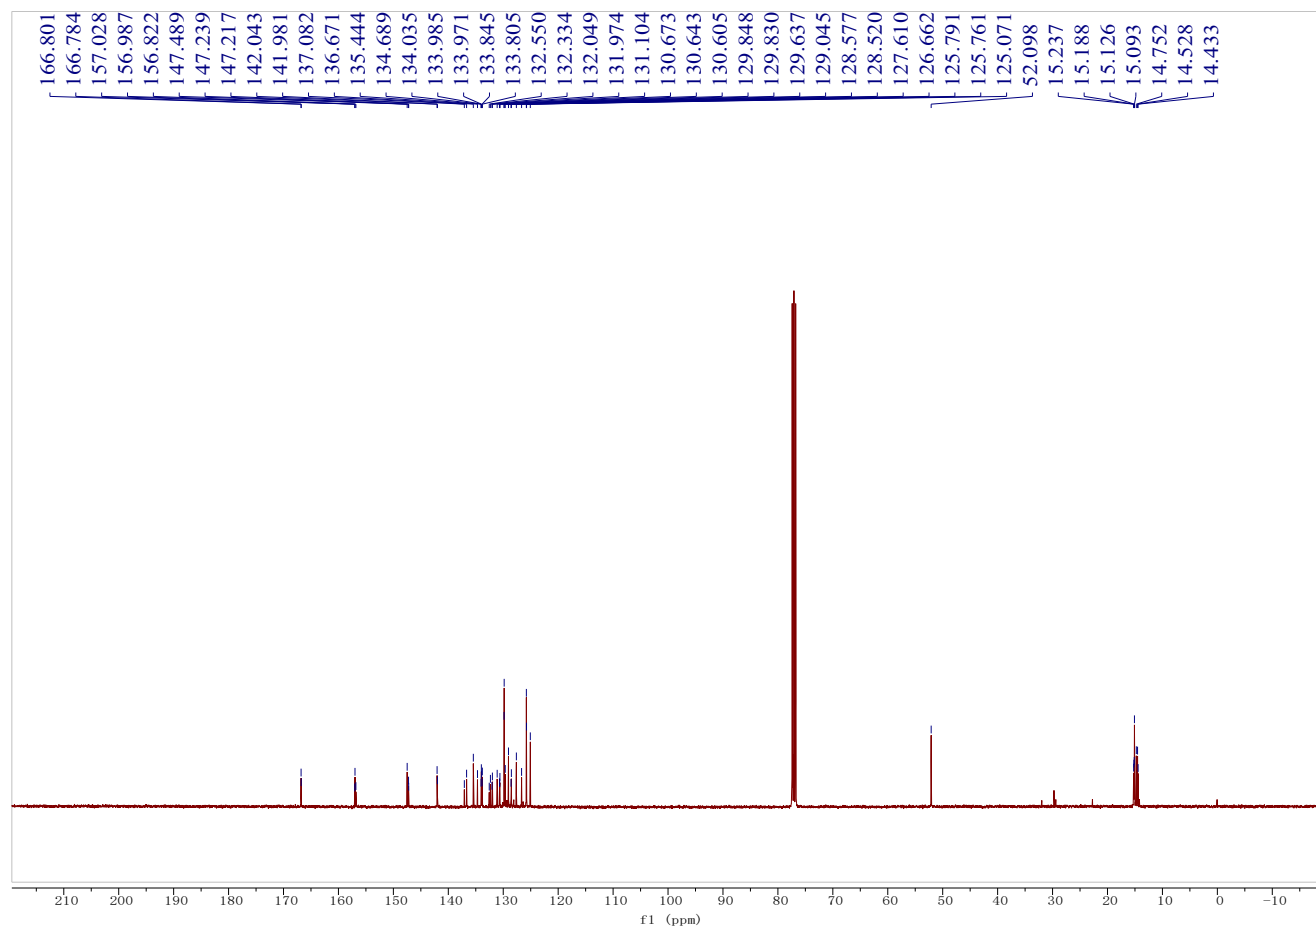

3y, <sup>1</sup>H NMR, 400 MHz, CDCl<sub>3</sub>

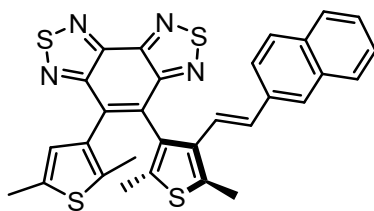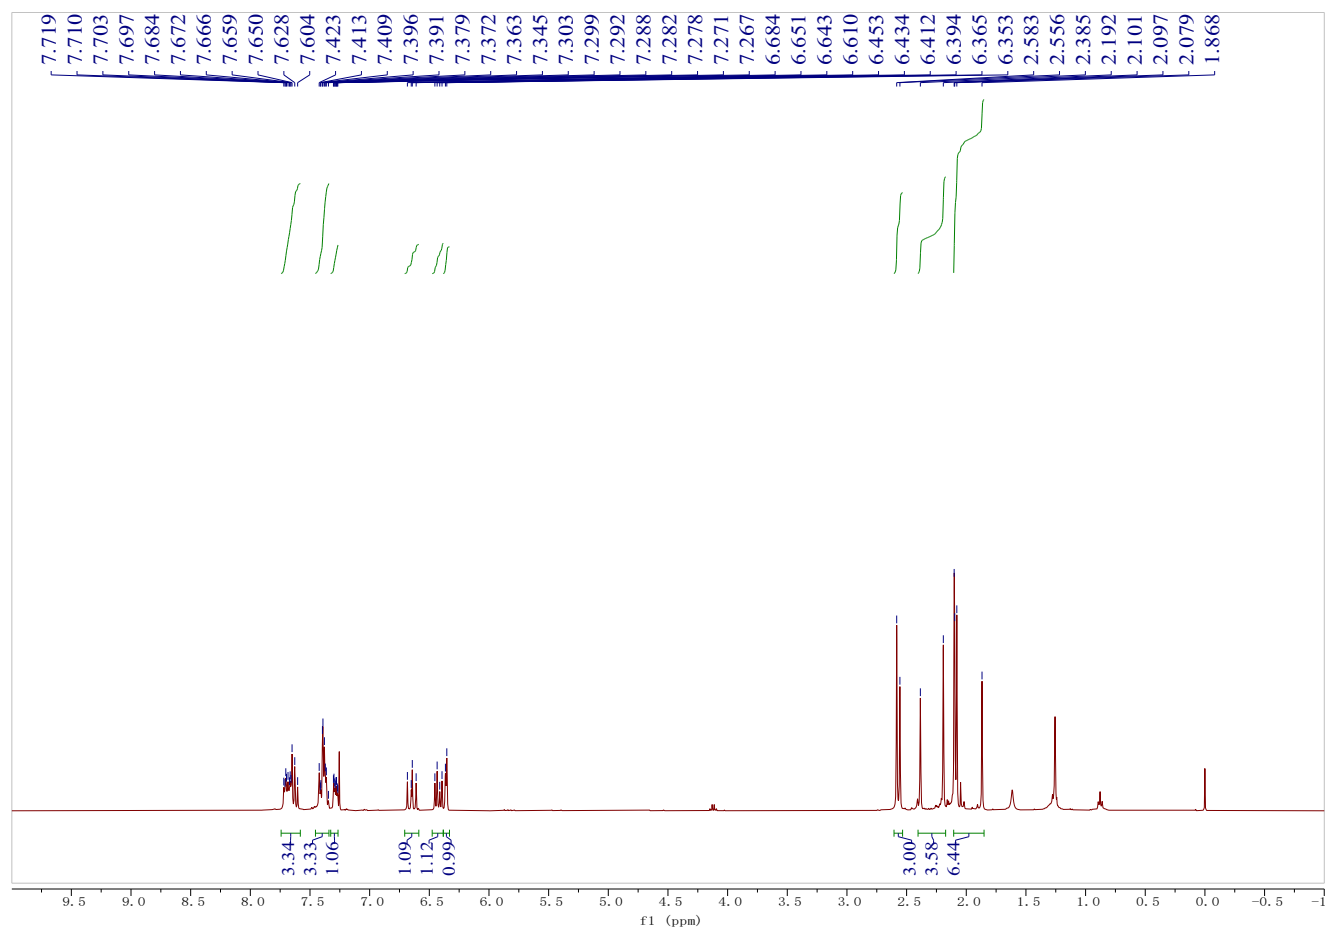

3y, <sup>13</sup>C NMR, 101 MHz, CDCl<sub>3</sub>

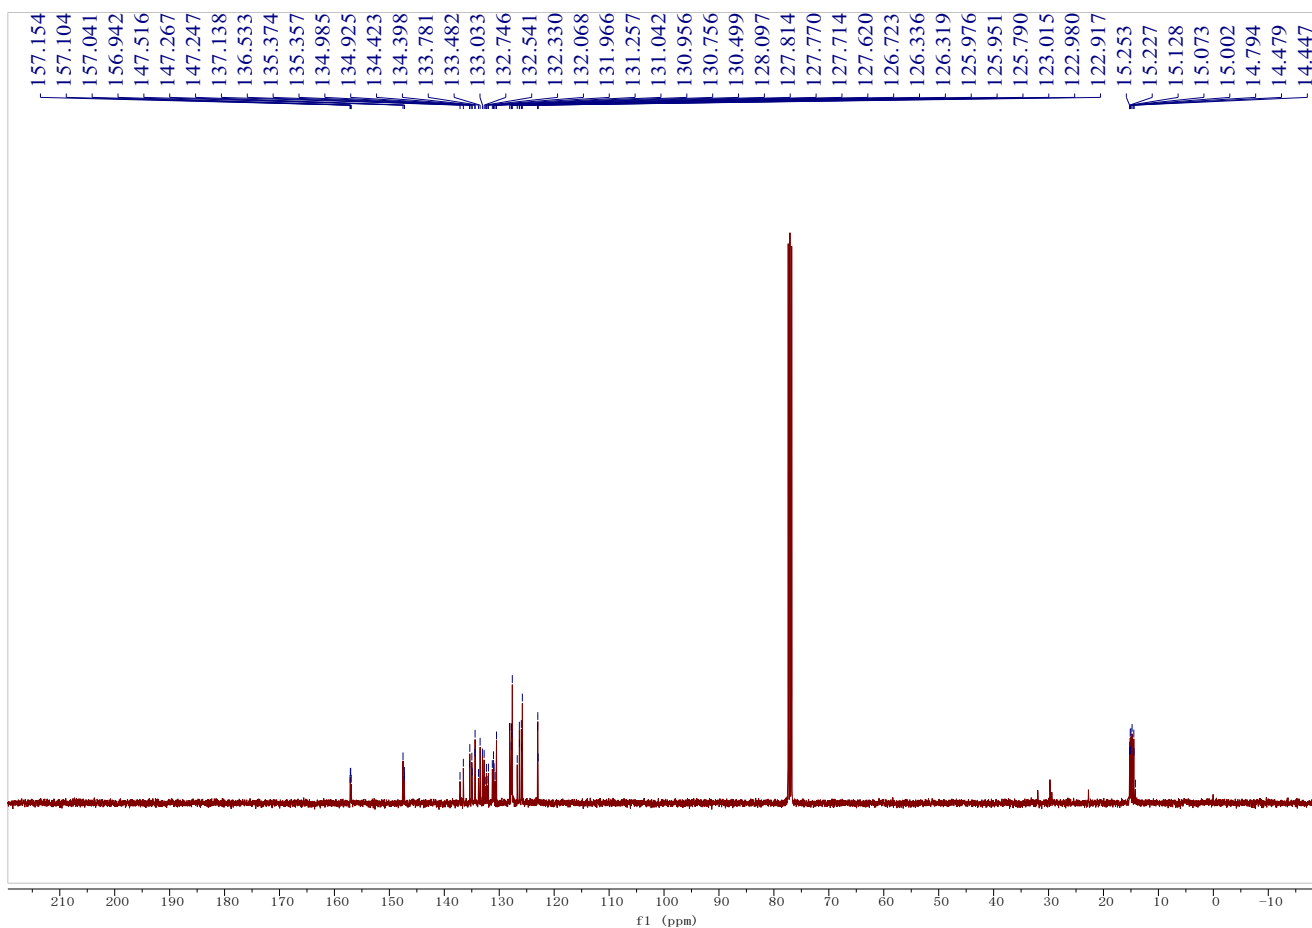

3z-mono, <sup>1</sup>H NMR, 400 MHz, CDCl<sub>3</sub>

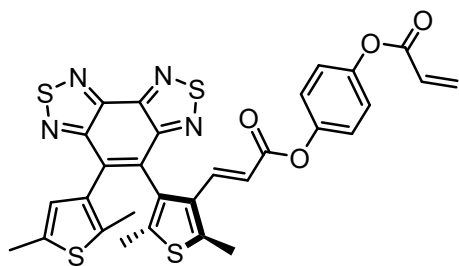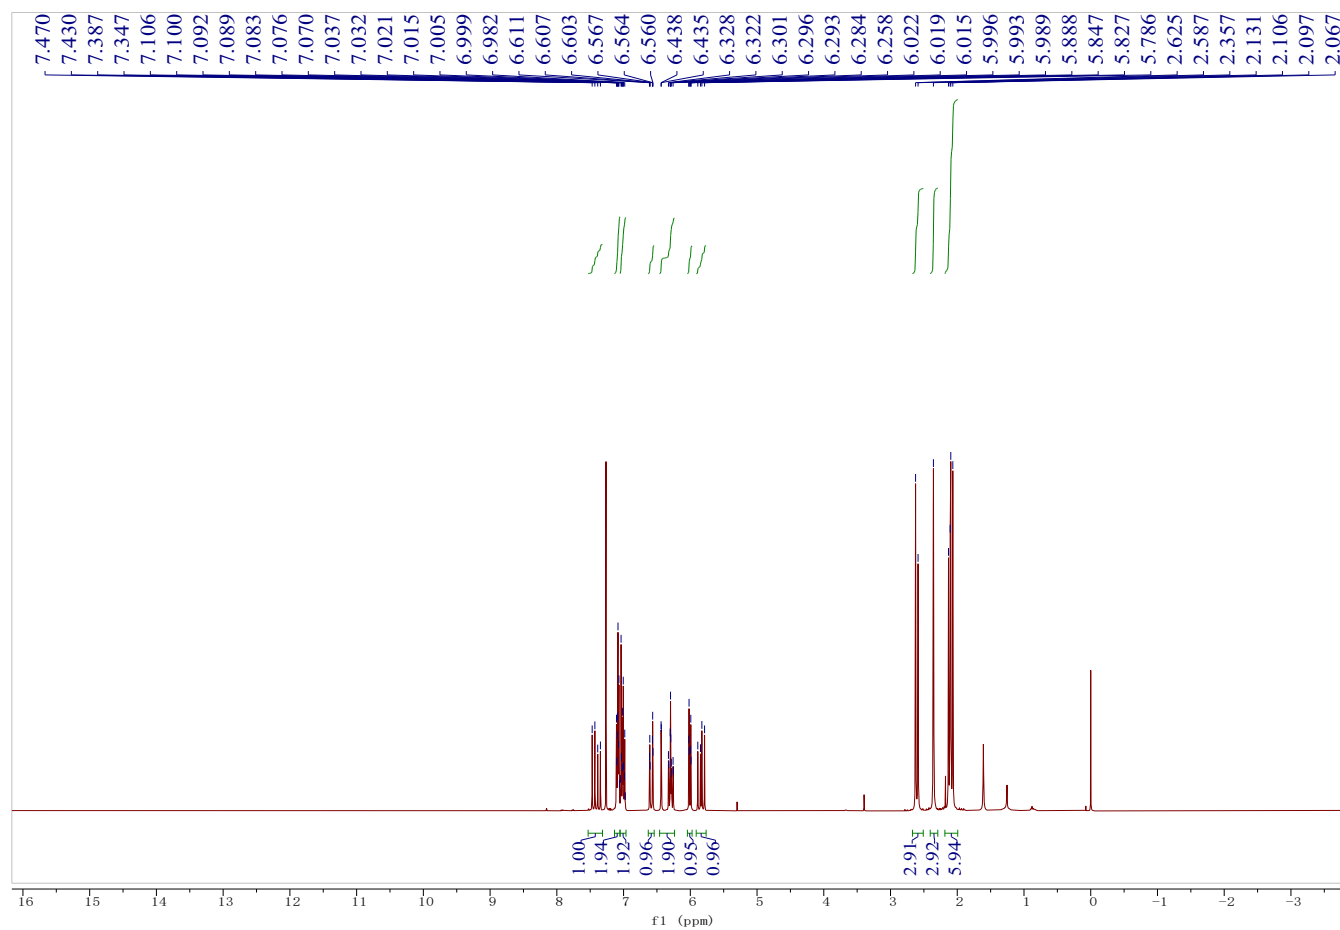

3z-mono,  $^{13}\text{C}$  NMR, 101 MHz,  $\text{CDCl}_3$

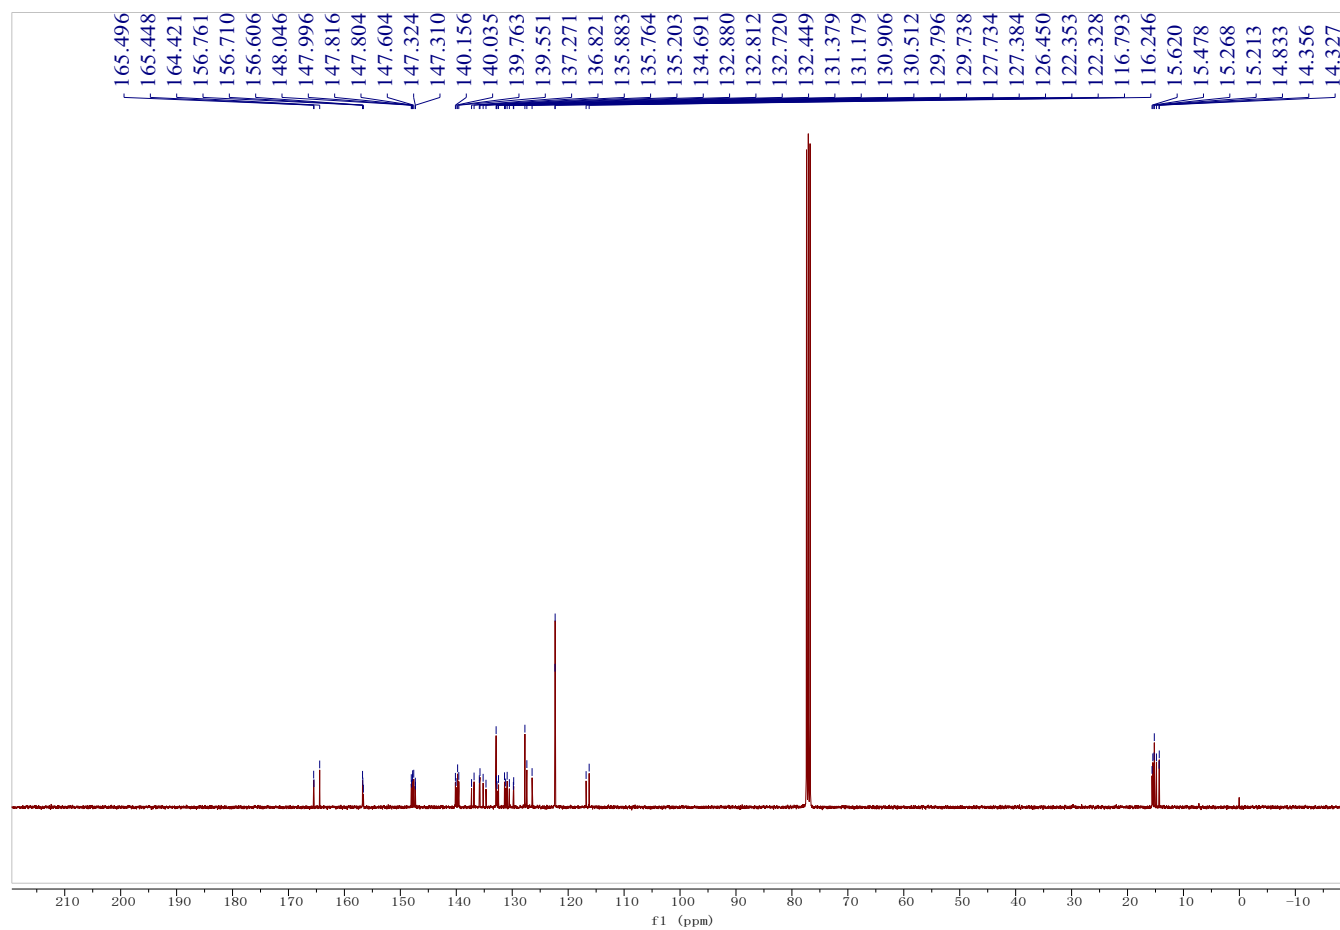

3z-di, <sup>1</sup>H NMR, 400 MHz, CDCl<sub>3</sub>

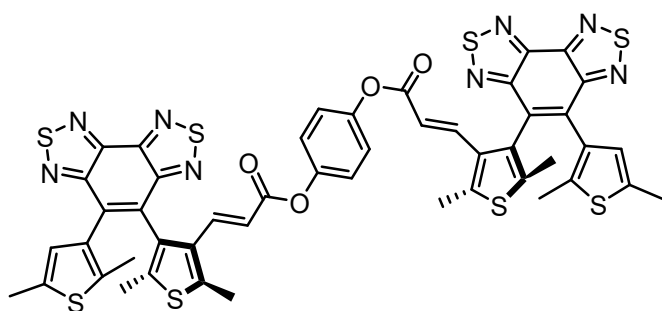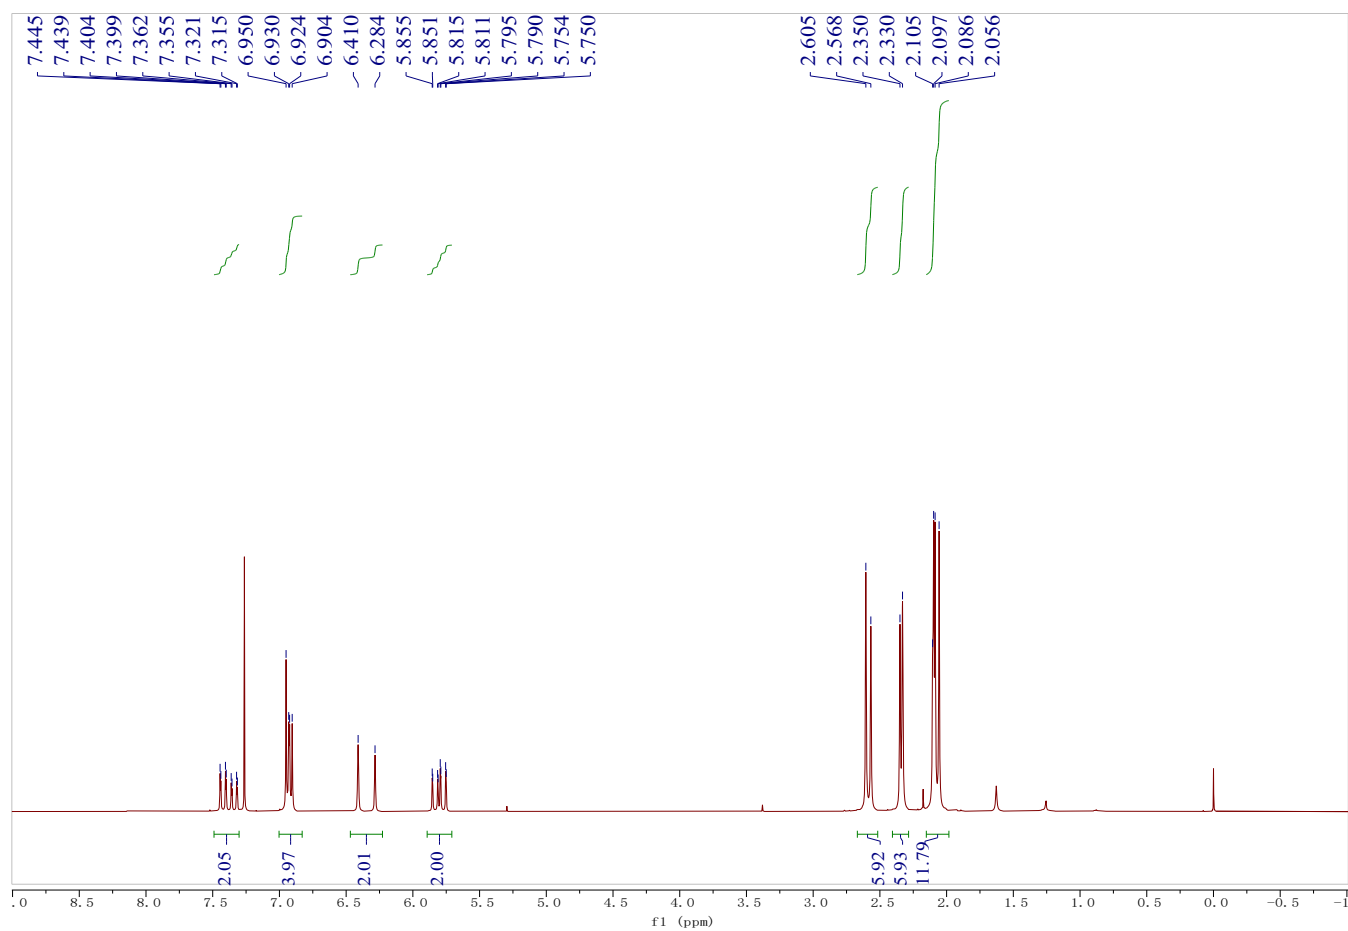

3z-di, <sup>13</sup>C NMR, 101 MHz, CDCl<sub>3</sub>

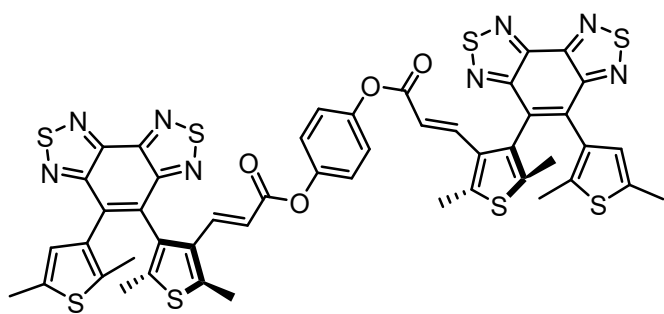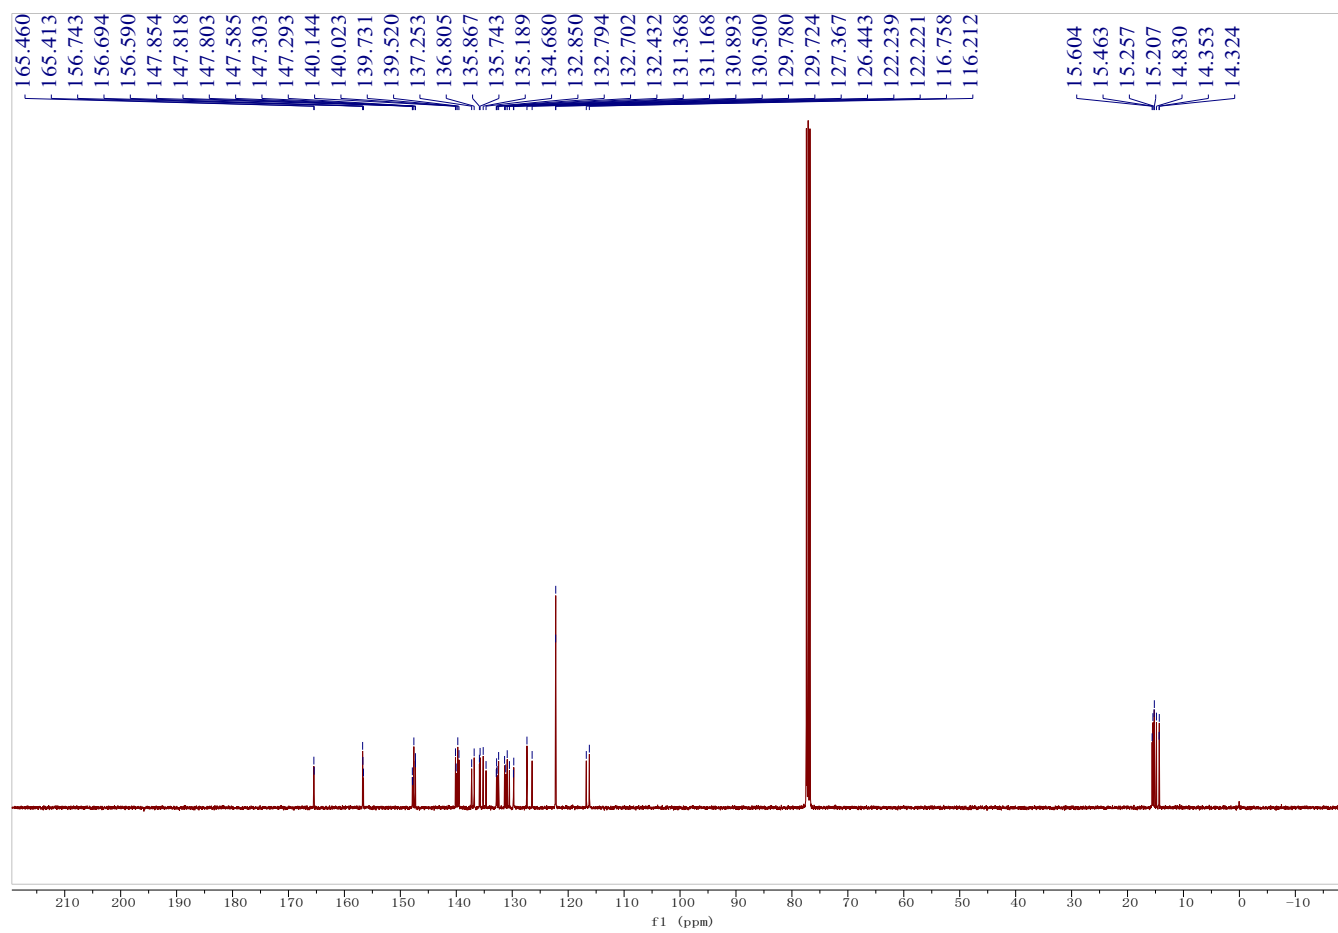



3aa, <sup>1</sup>H NMR, 400 MHz, CDCl<sub>3</sub>

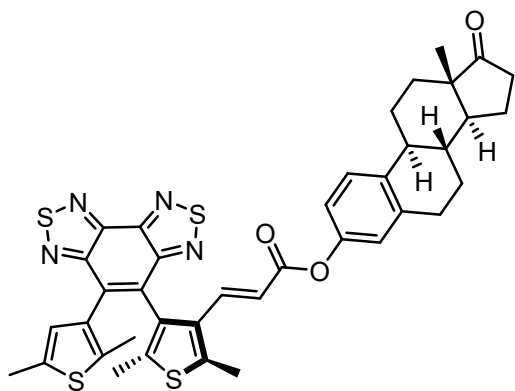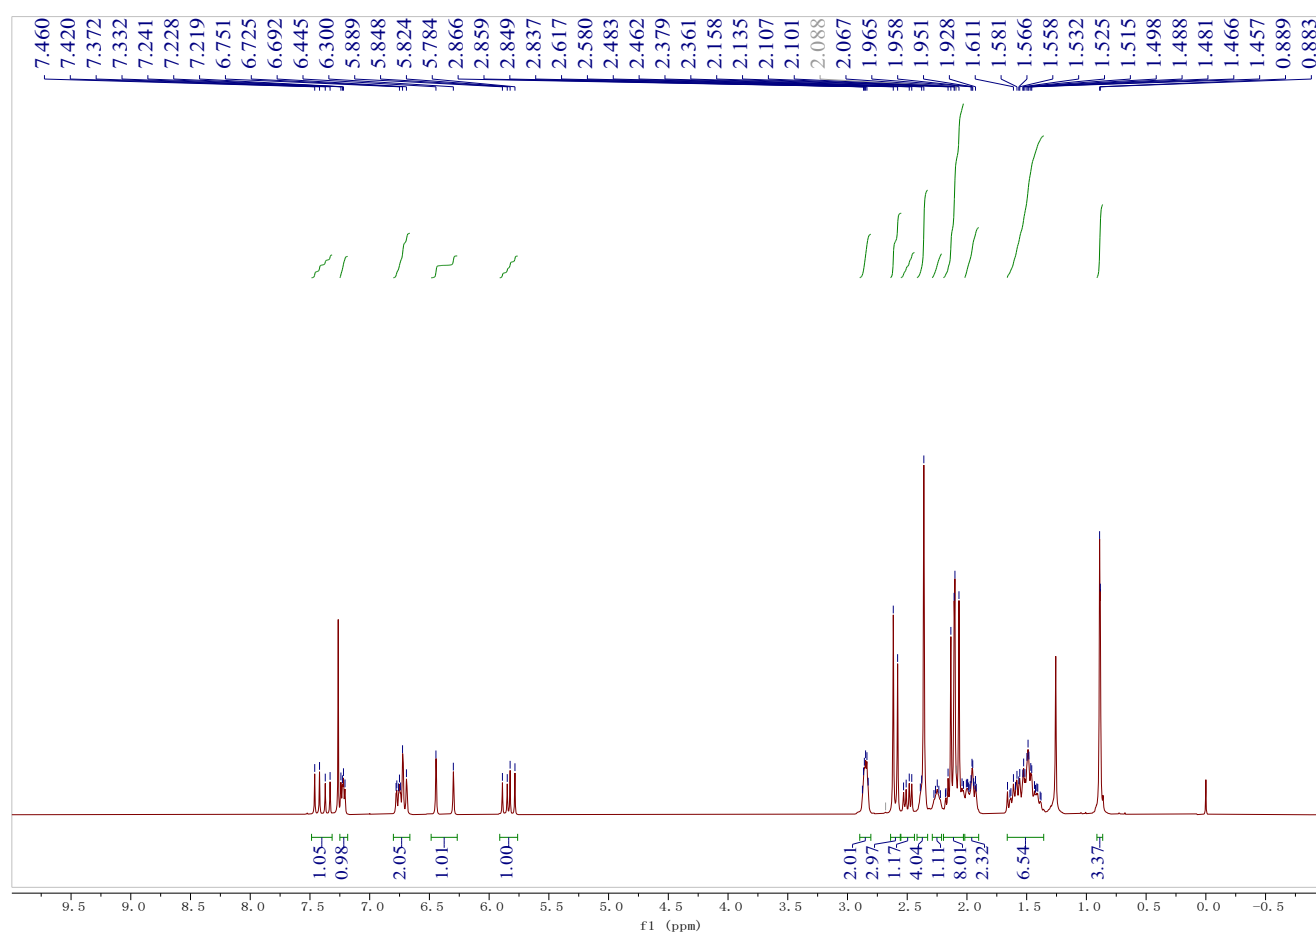

3aa,  $^{13}\text{C}$  NMR, 101 MHz,  $\text{CDCl}_3$

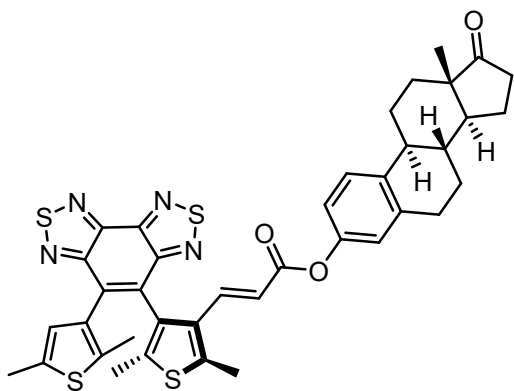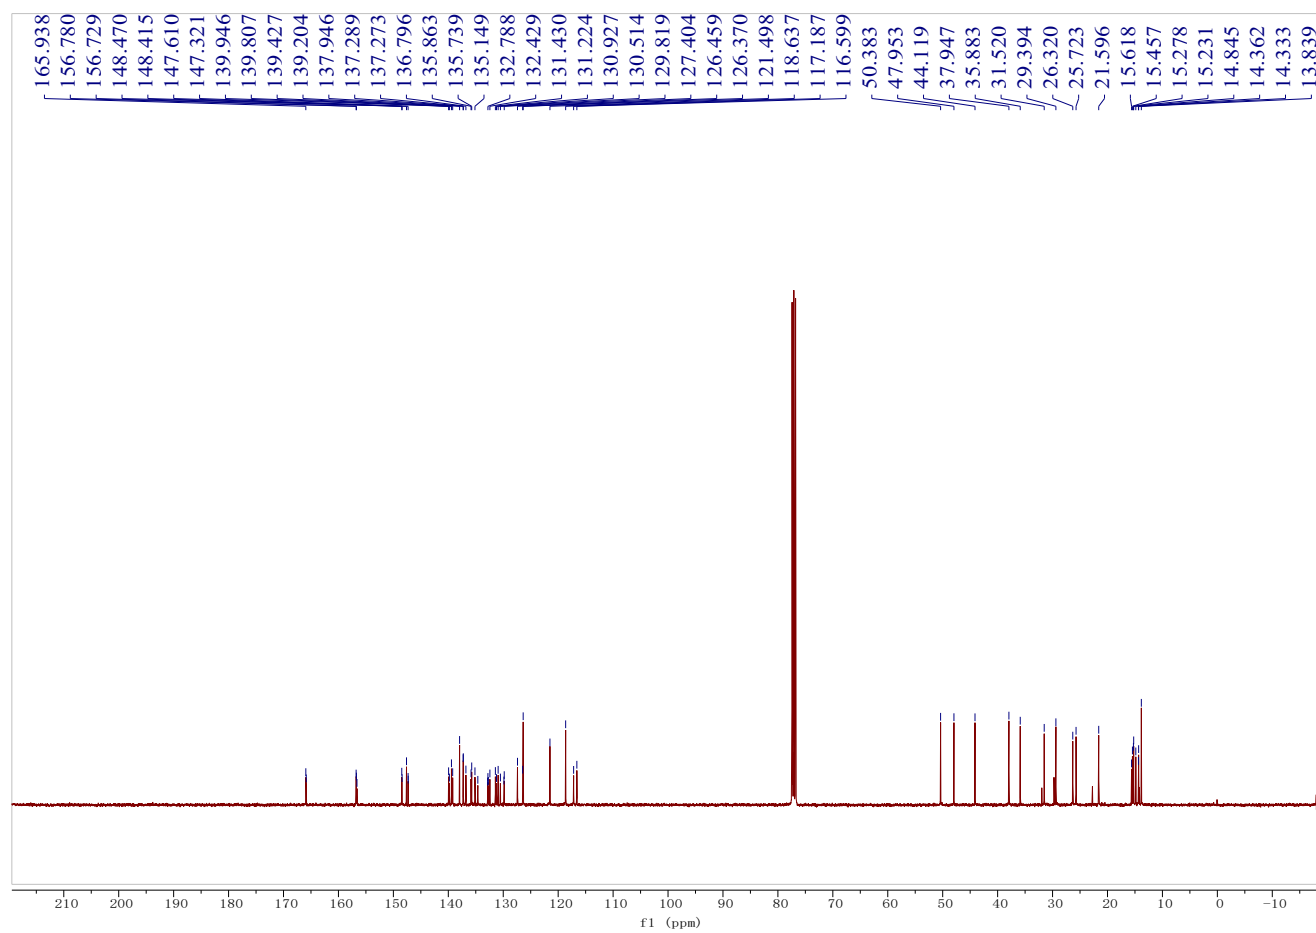

3ab, <sup>1</sup>H NMR, 400 MHz, CDCl<sub>3</sub>

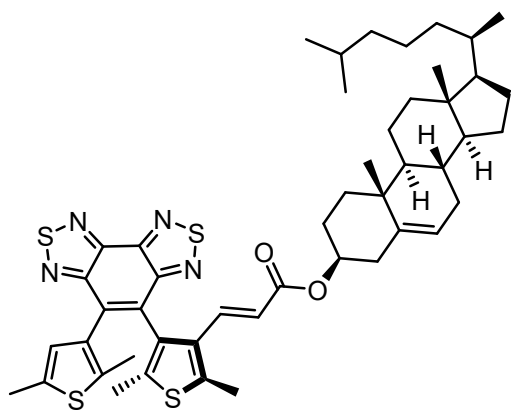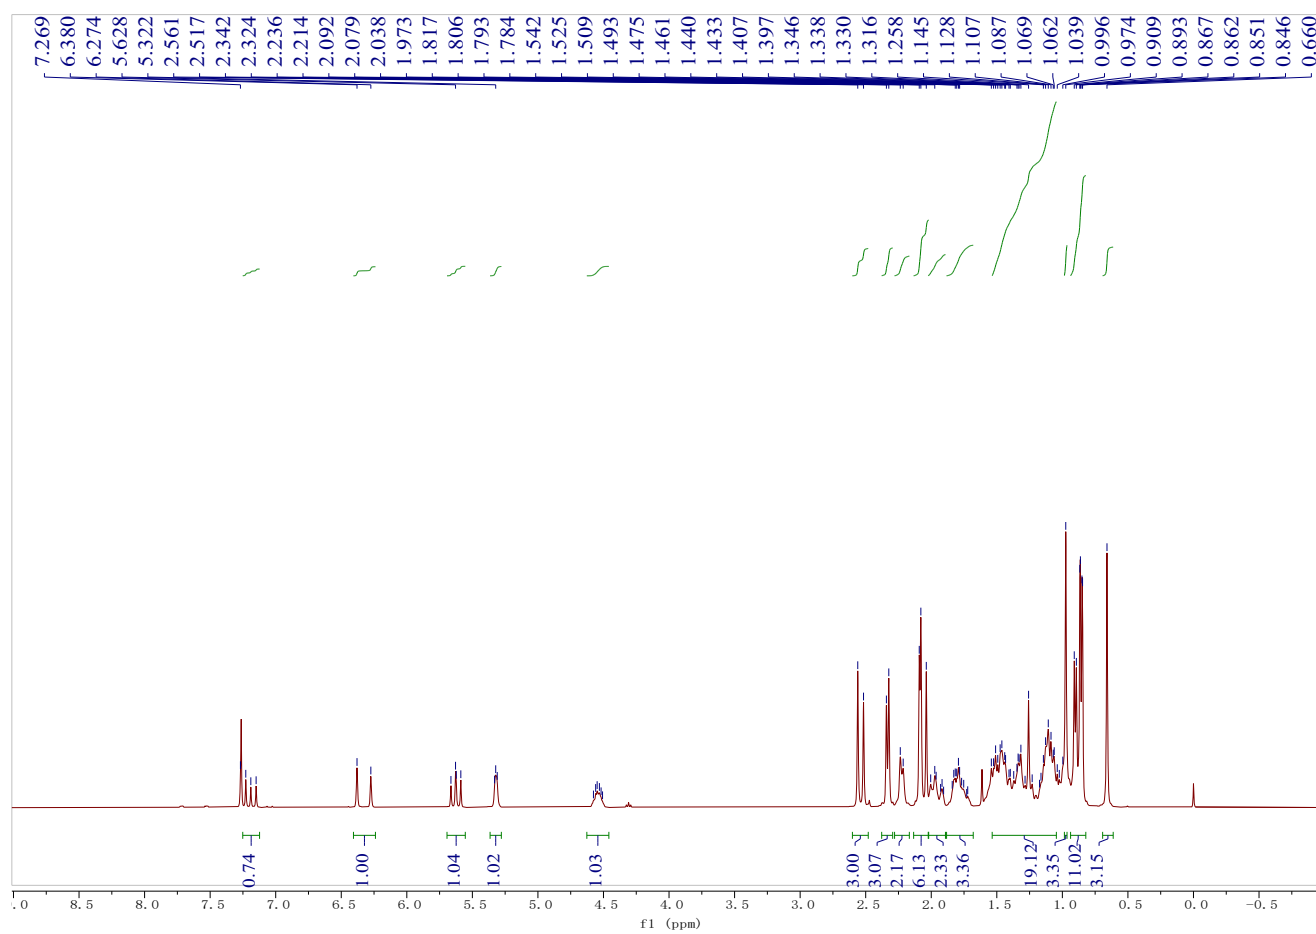

3ab,  $^{13}\text{C}$  NMR, 101 MHz,  $\text{CDCl}_3$

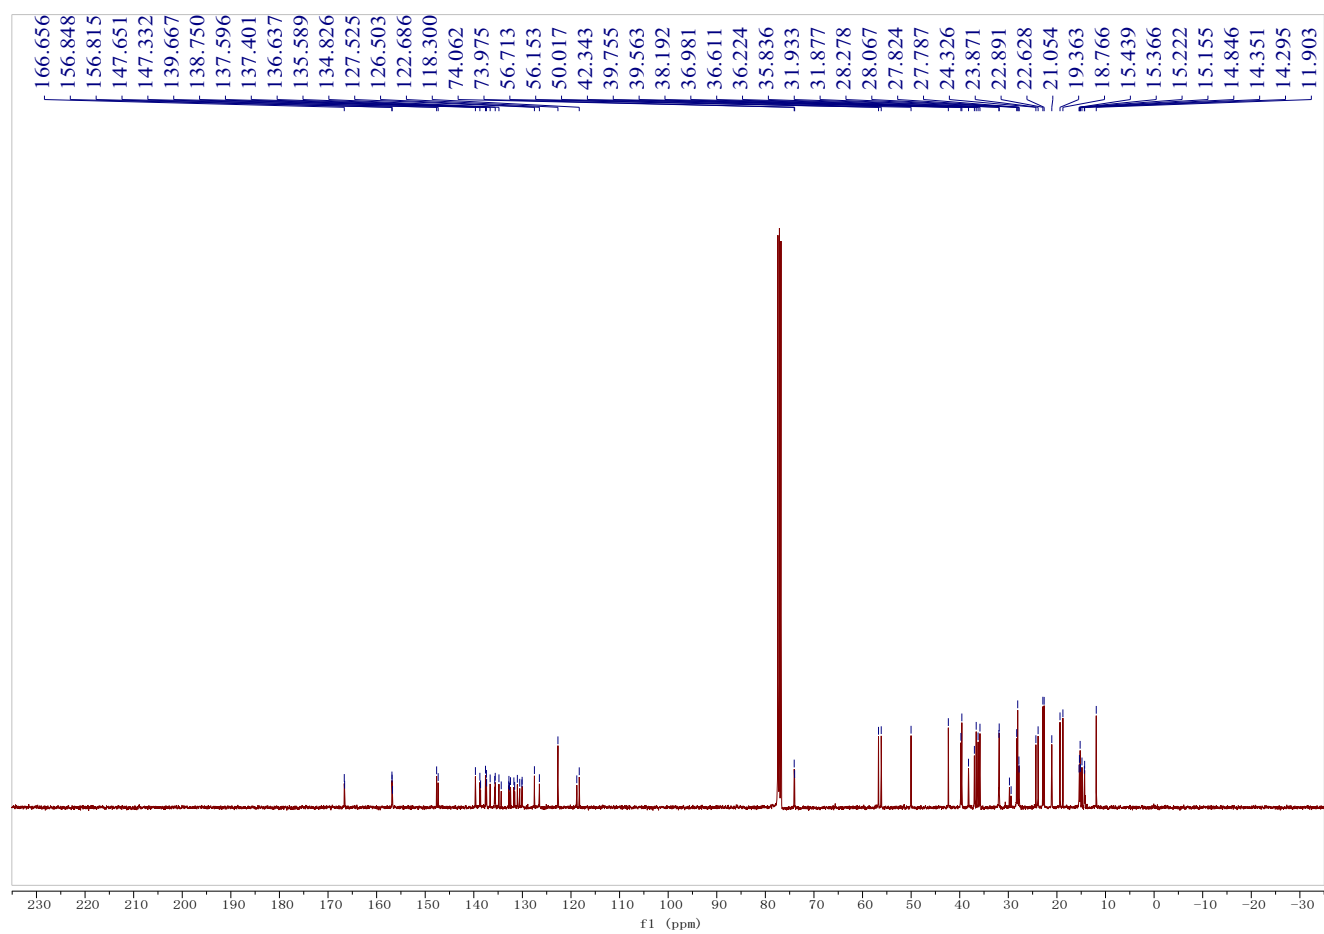

4, <sup>1</sup>H NMR, 400 MHz, DMSO-d<sub>6</sub>

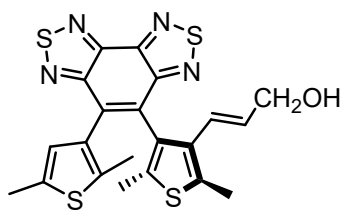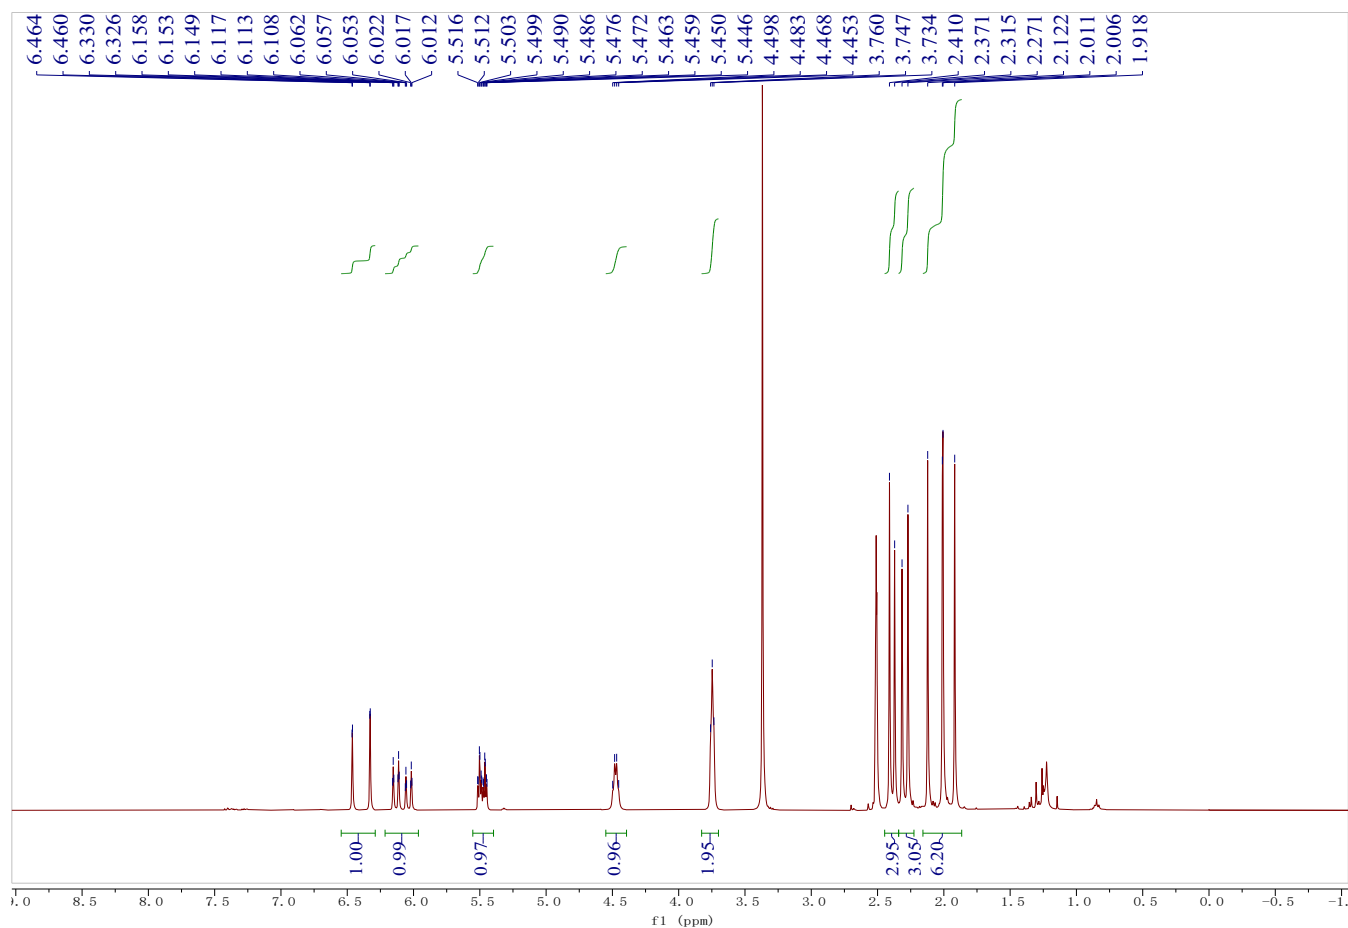

4, <sup>13</sup>C NMR, 101 MHz, DMSO-d<sub>6</sub>

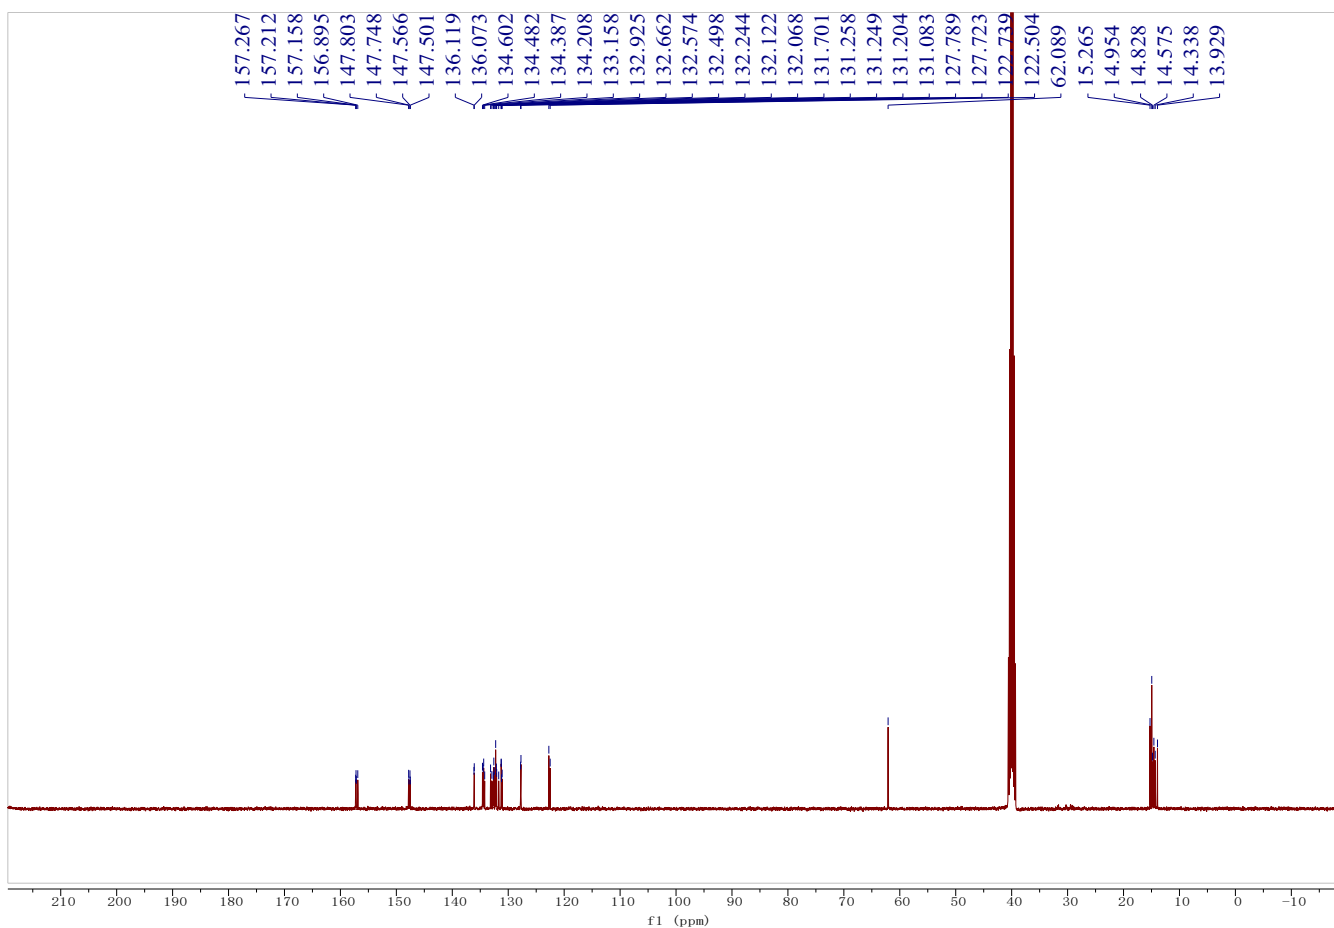

5, <sup>1</sup>H NMR, 400 MHz, CDCl<sub>3</sub>

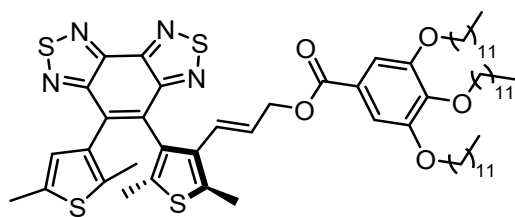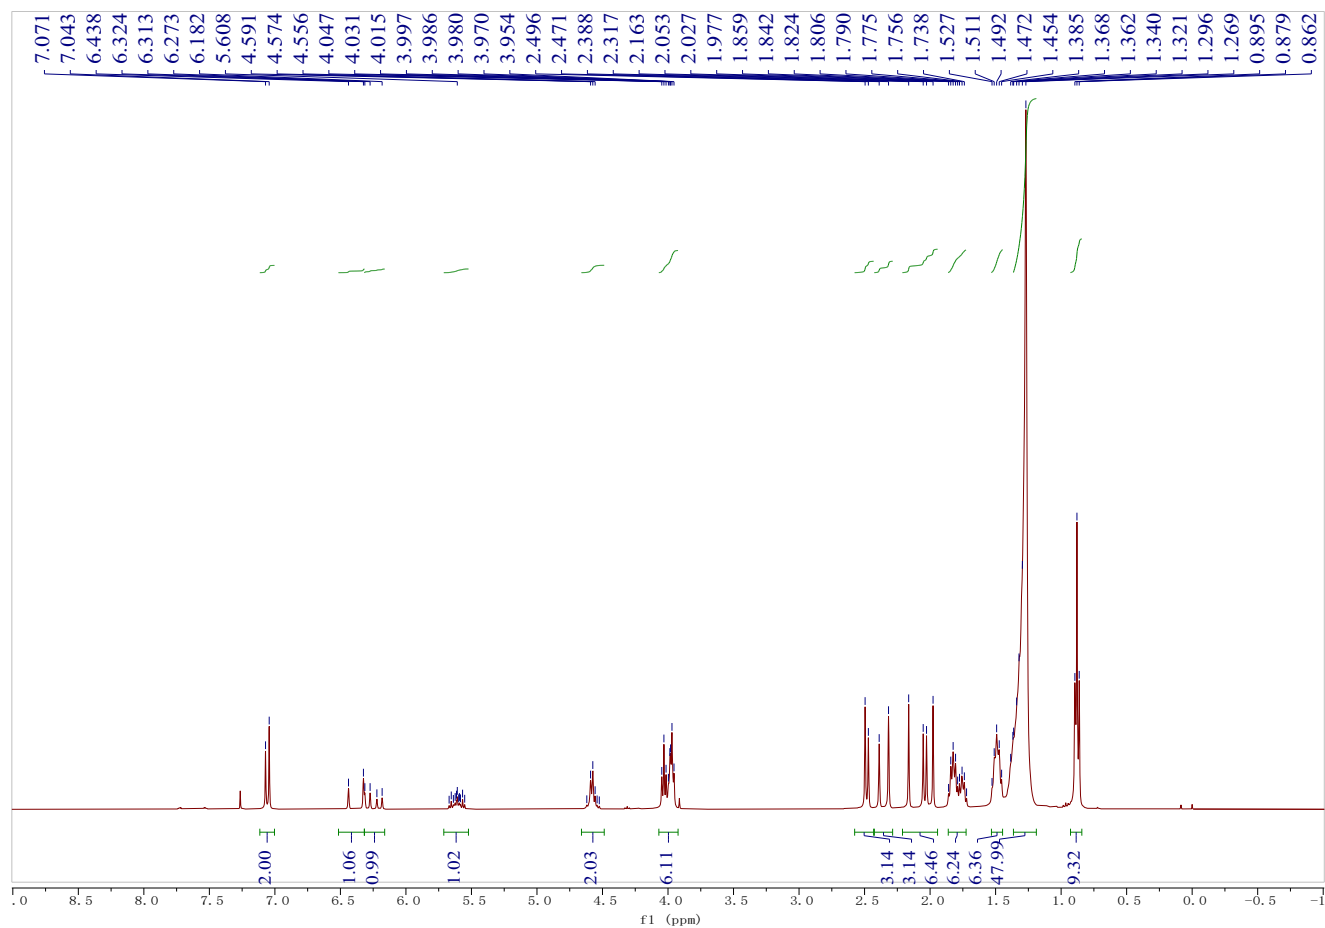

5, <sup>13</sup>C NMR, 101 MHz, CDCl<sub>3</sub>

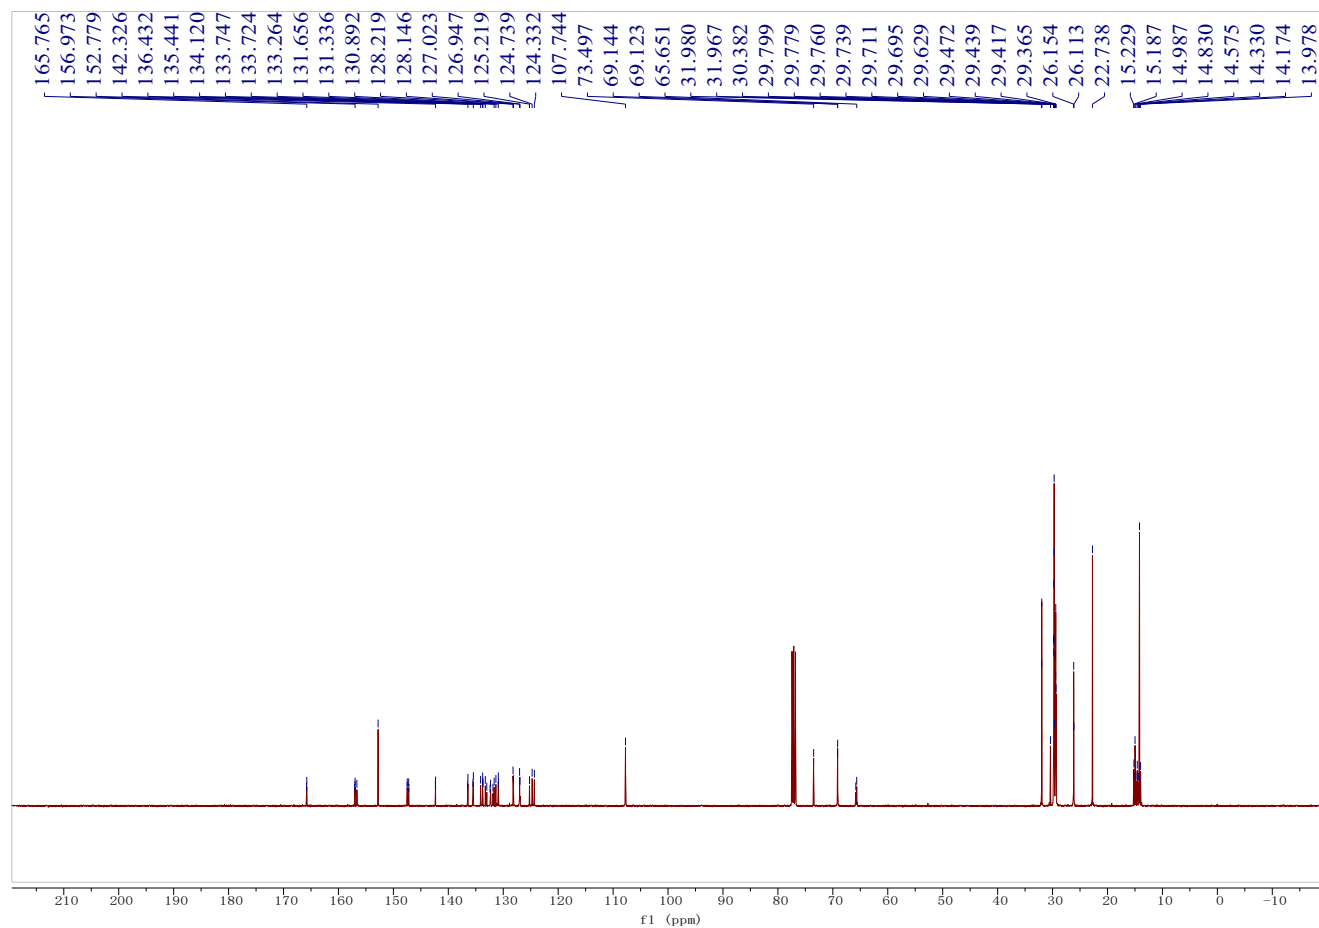



6a, <sup>1</sup>H NMR, 400 MHz, DMSO-d<sub>6</sub>

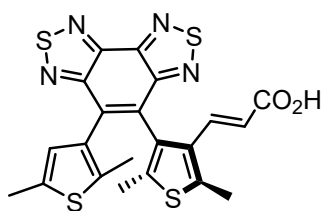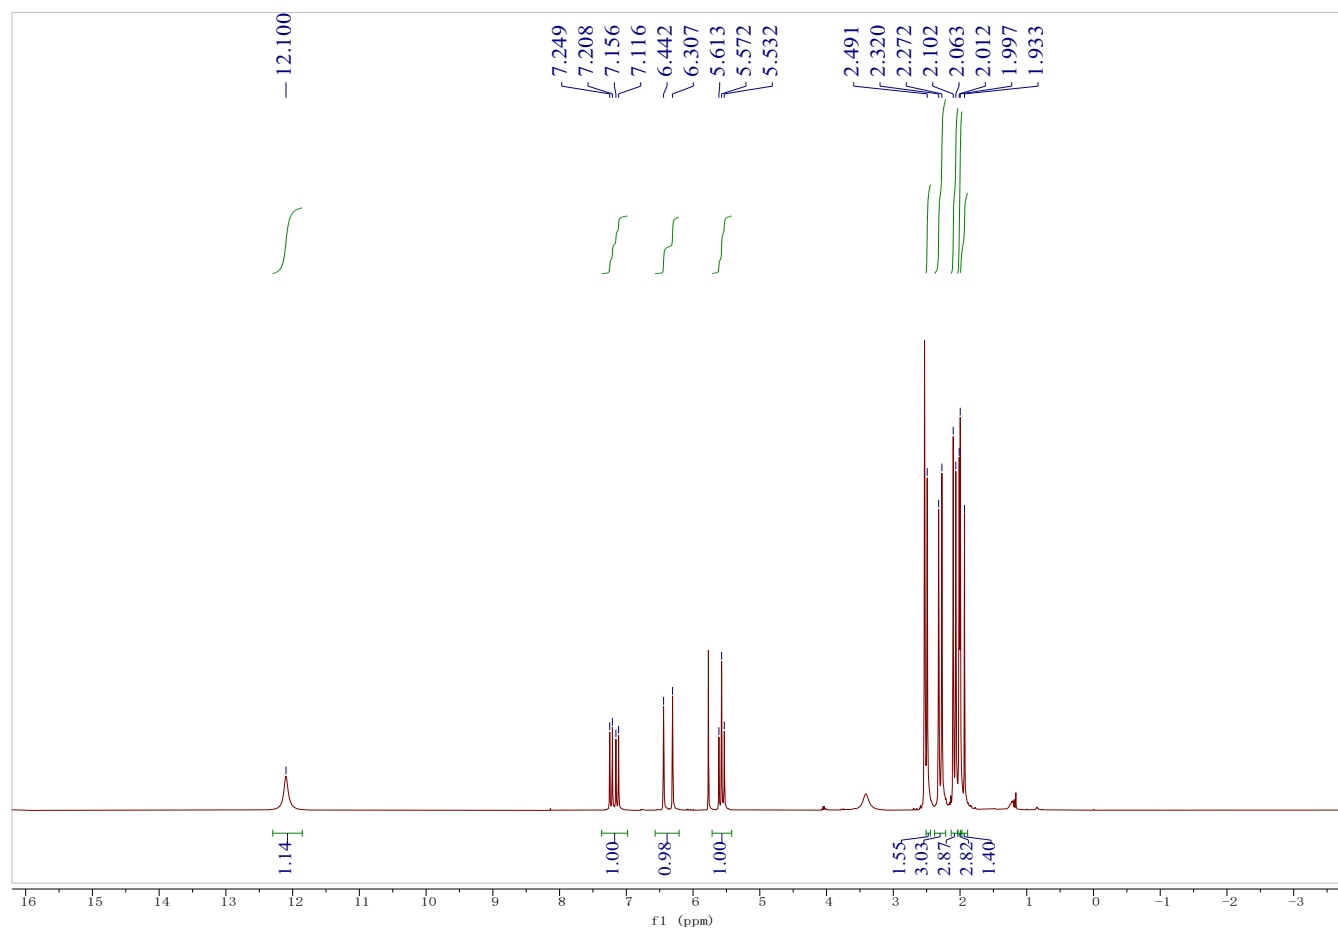

6a, <sup>13</sup>C NMR, 101 MHz, DMSO-d<sub>6</sub>

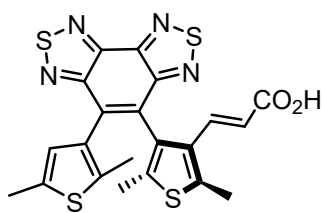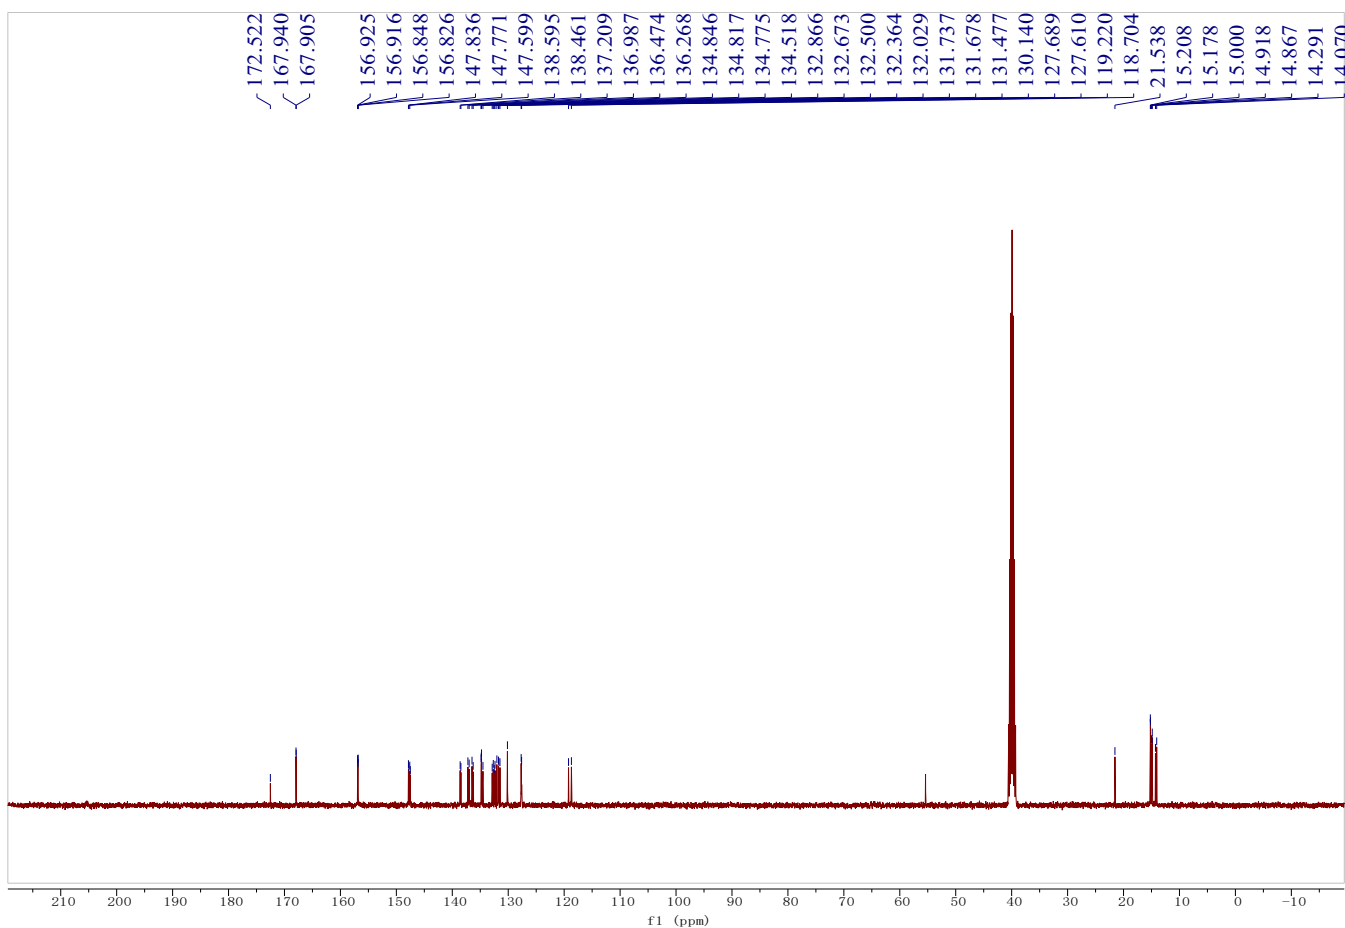

7, <sup>1</sup>H NMR, 400 MHz, CDCl<sub>3</sub>

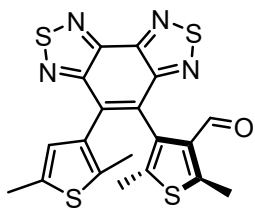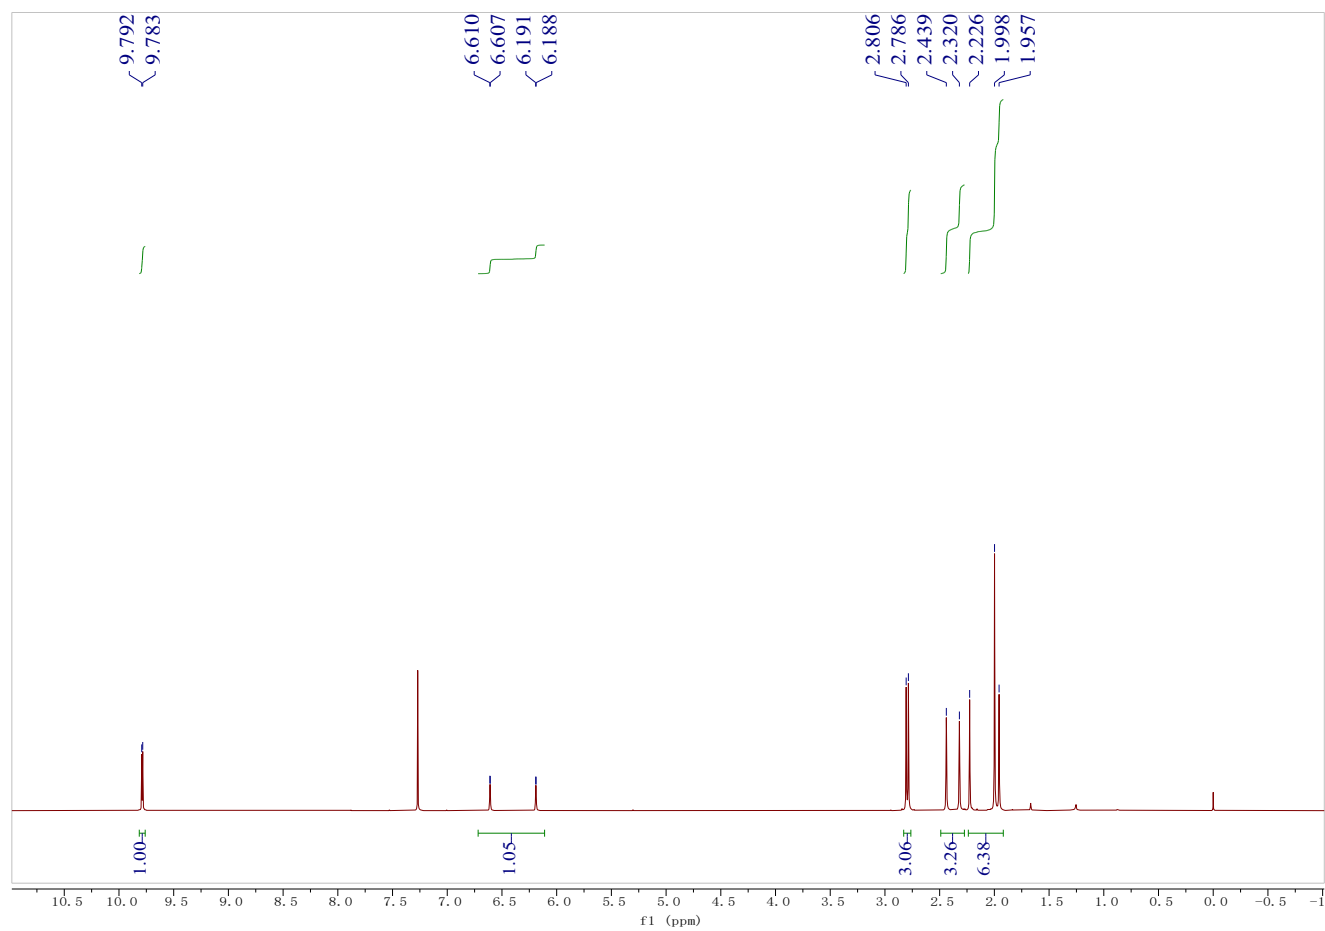

7, <sup>13</sup>C NMR, 101 MHz, CDCl<sub>3</sub>

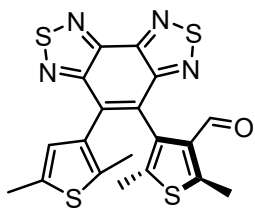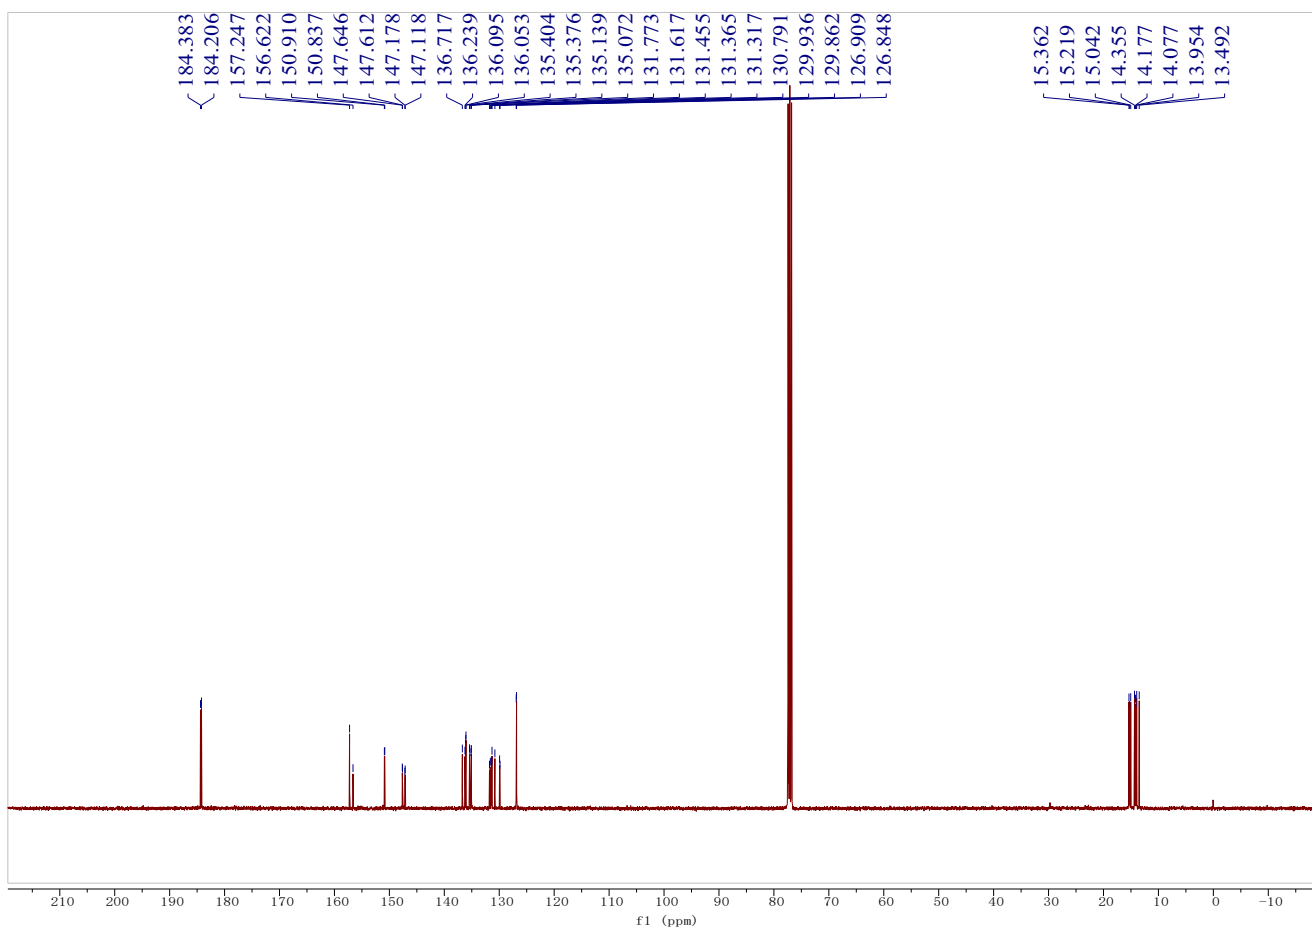

8, <sup>1</sup>H NMR, 400 MHz, DMSO-*d*<sub>6</sub>

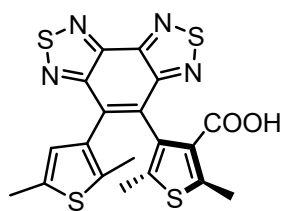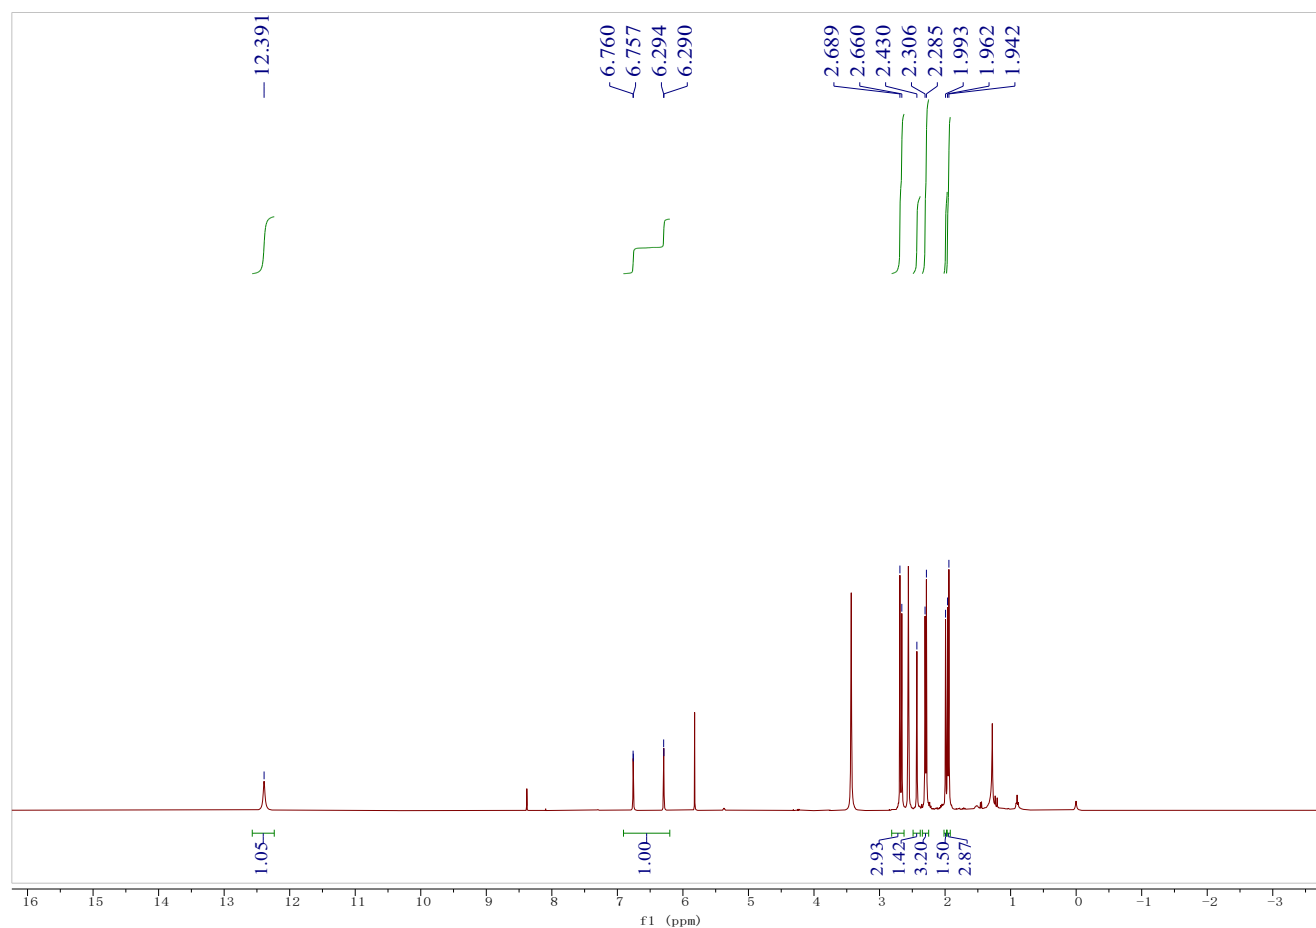

8, <sup>13</sup>C NMR, 101 MHz, DMSO-*d*<sub>6</sub>

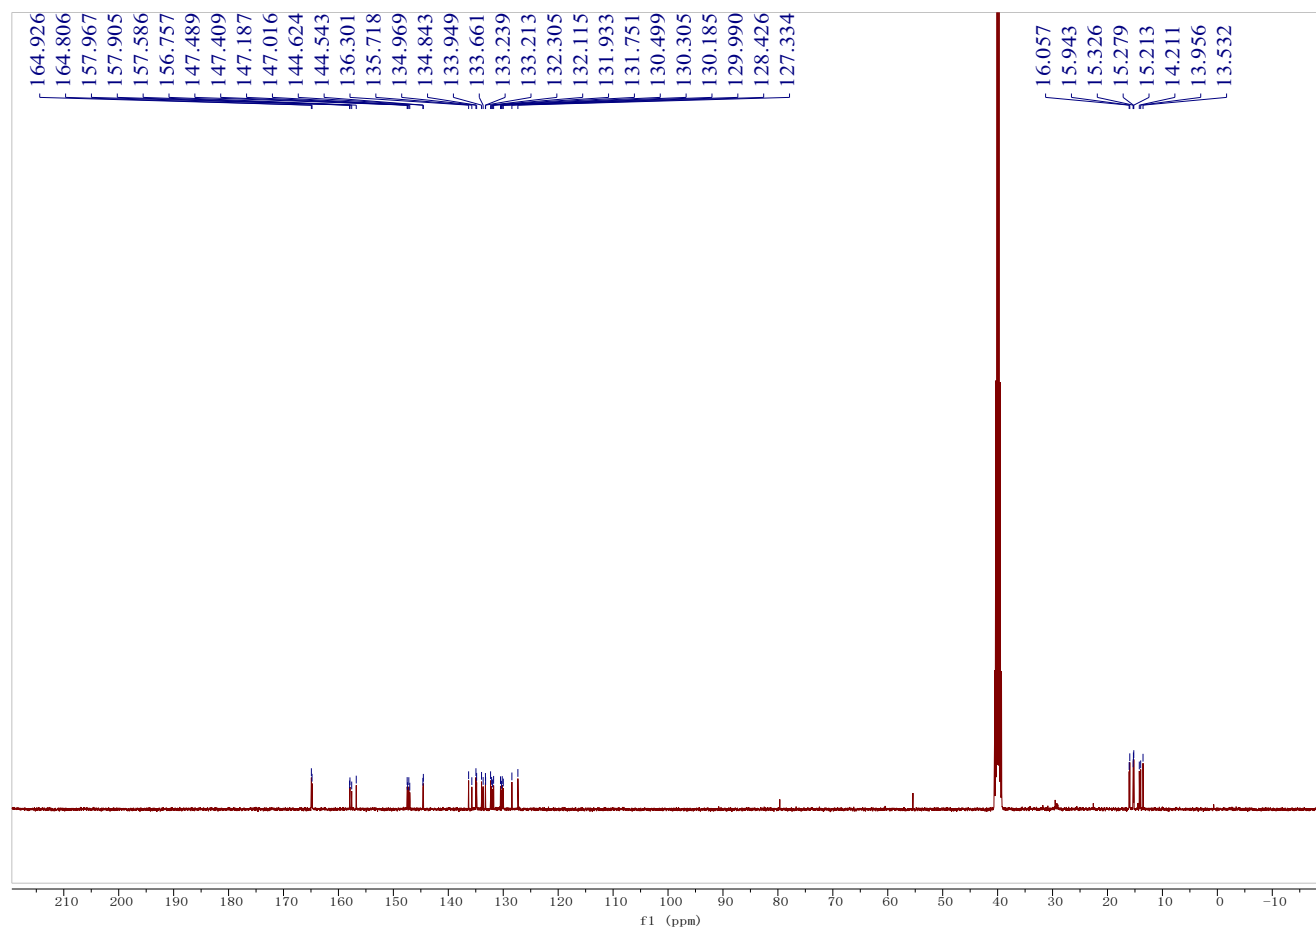

9, <sup>1</sup>H NMR, 400 MHz, CDCl<sub>3</sub>

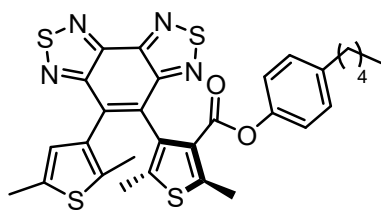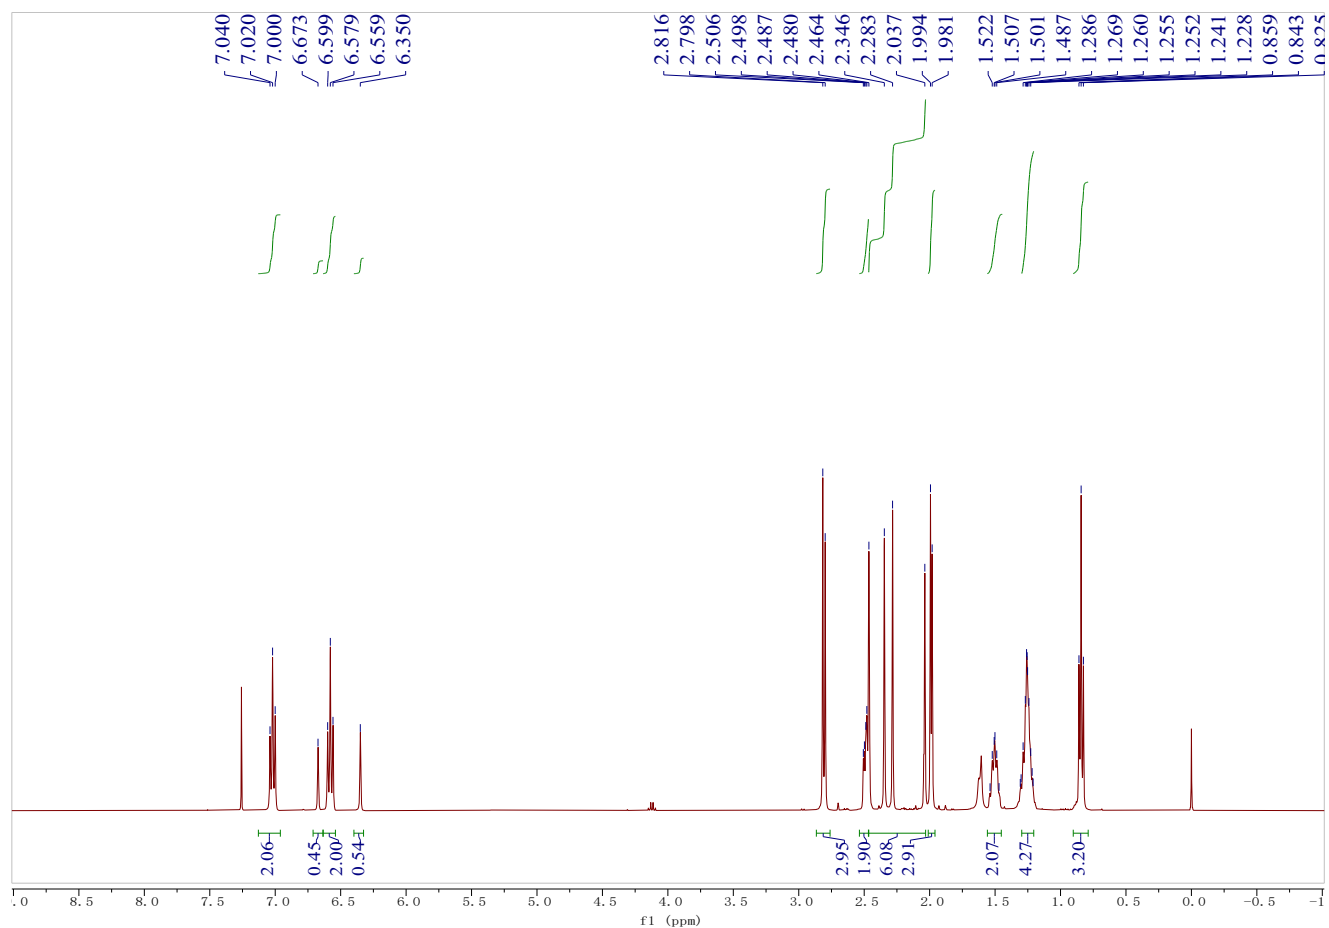

9, <sup>13</sup>C NMR, 101 MHz, CDCl<sub>3</sub>

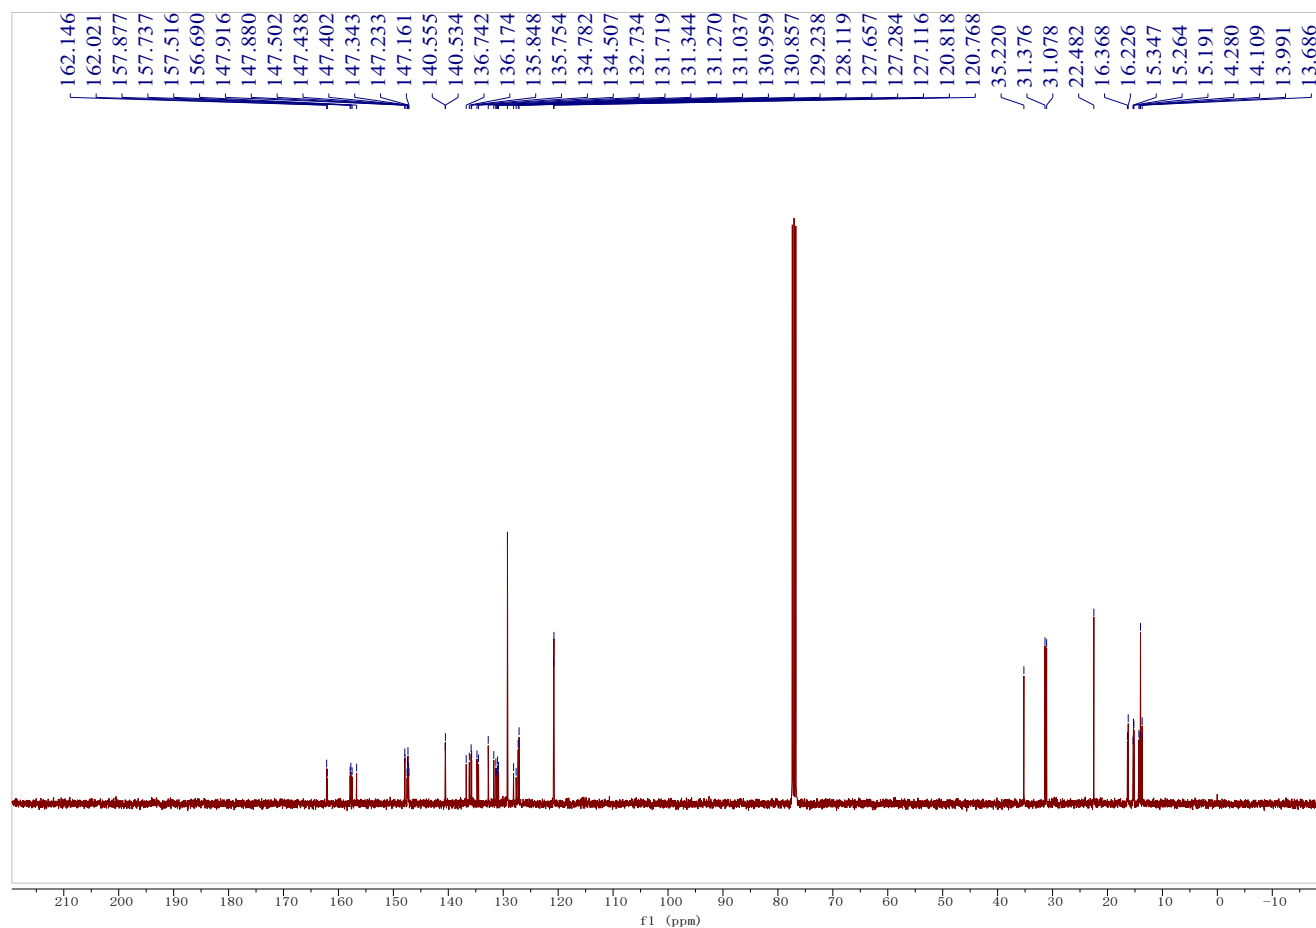



10, <sup>1</sup>H NMR, 400 MHz, CDCl<sub>3</sub>

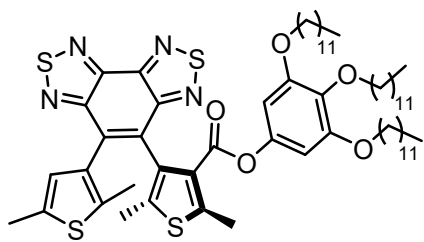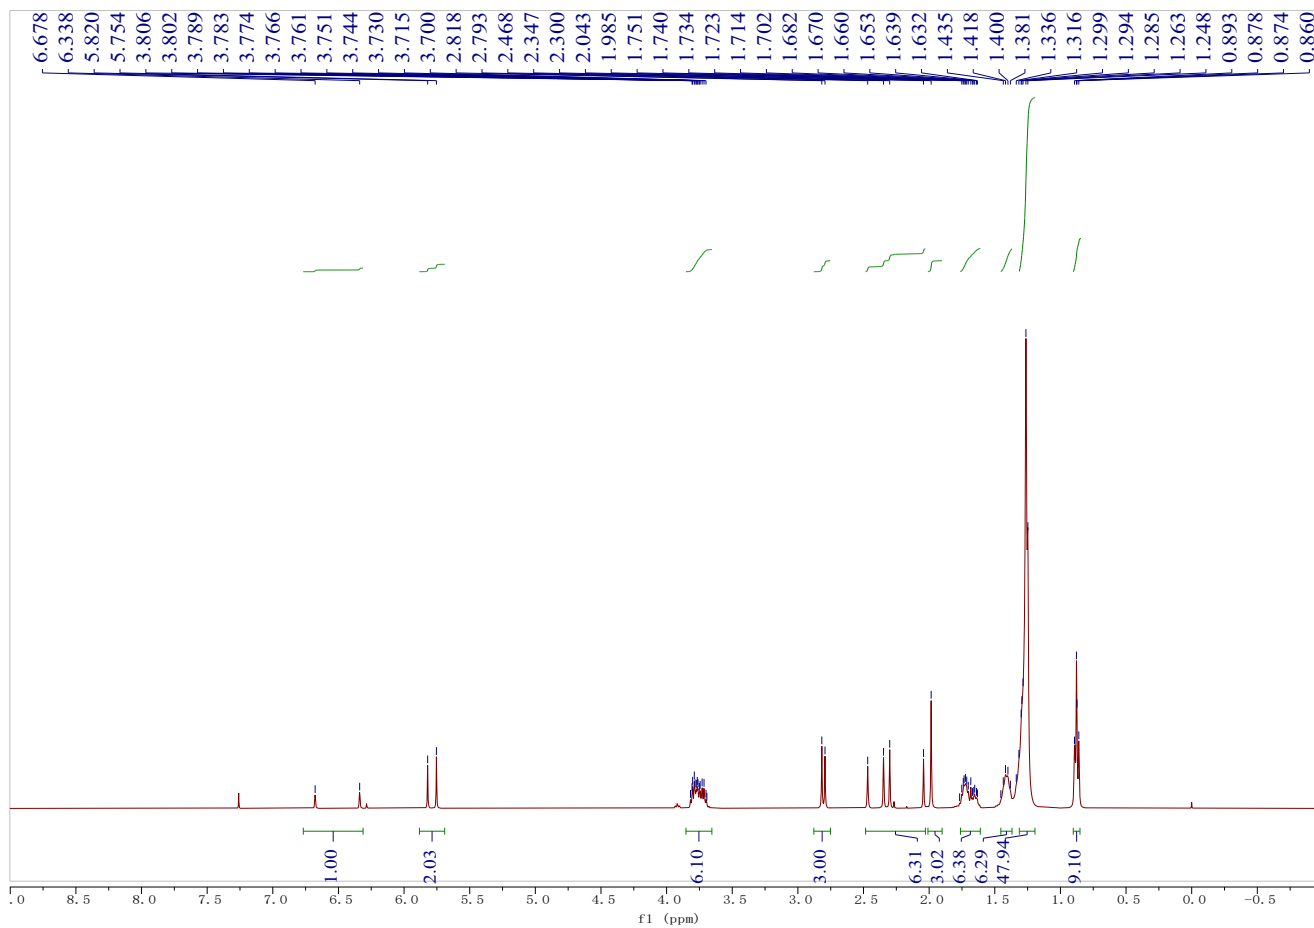

10, <sup>13</sup>C NMR, 101 MHz, CDCl<sub>3</sub>

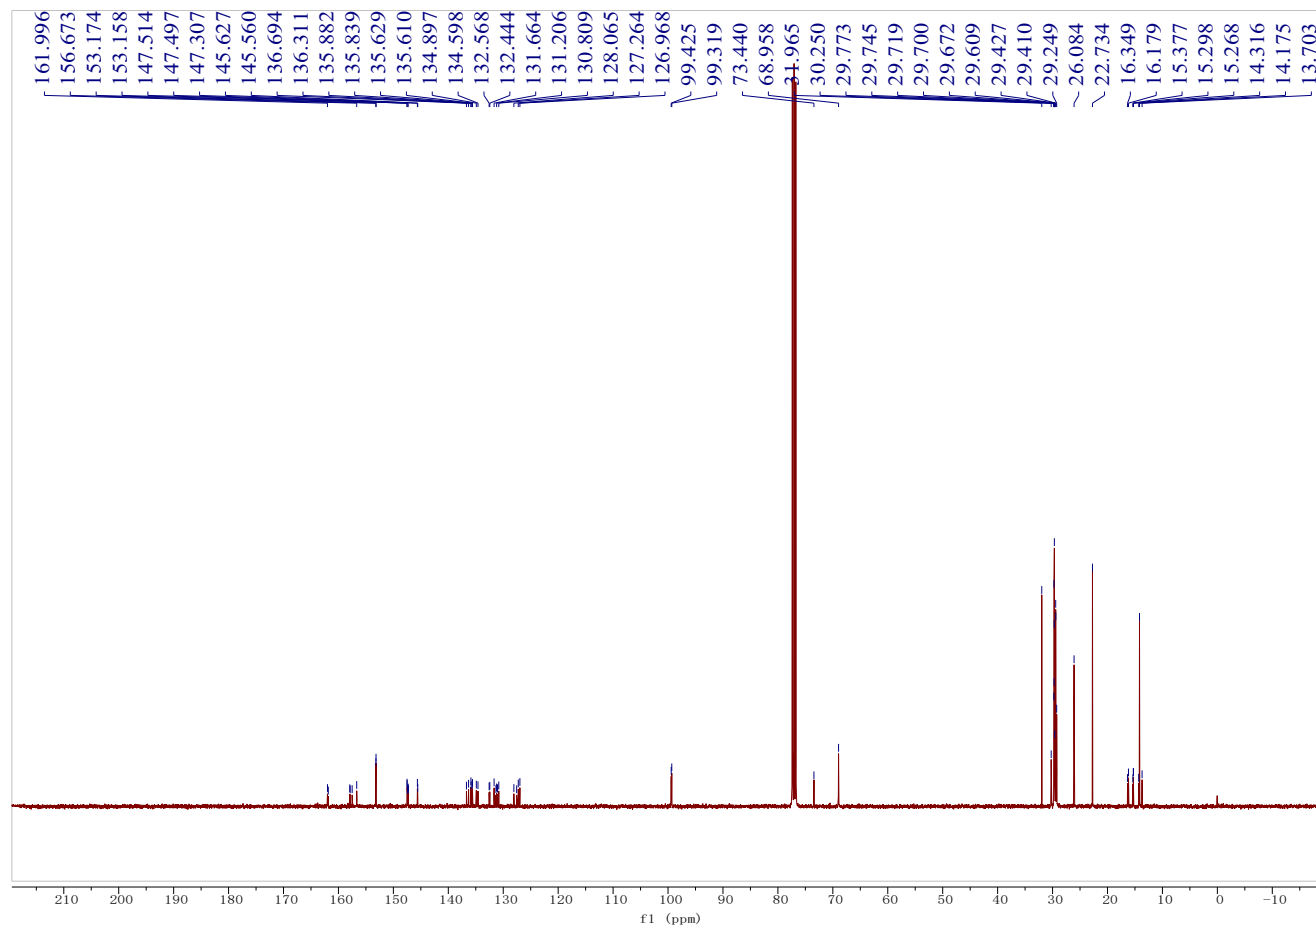

11, <sup>1</sup>H NMR, 400 MHz, CDCl<sub>3</sub>

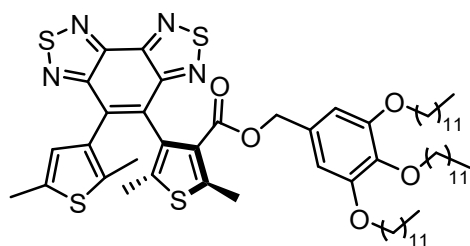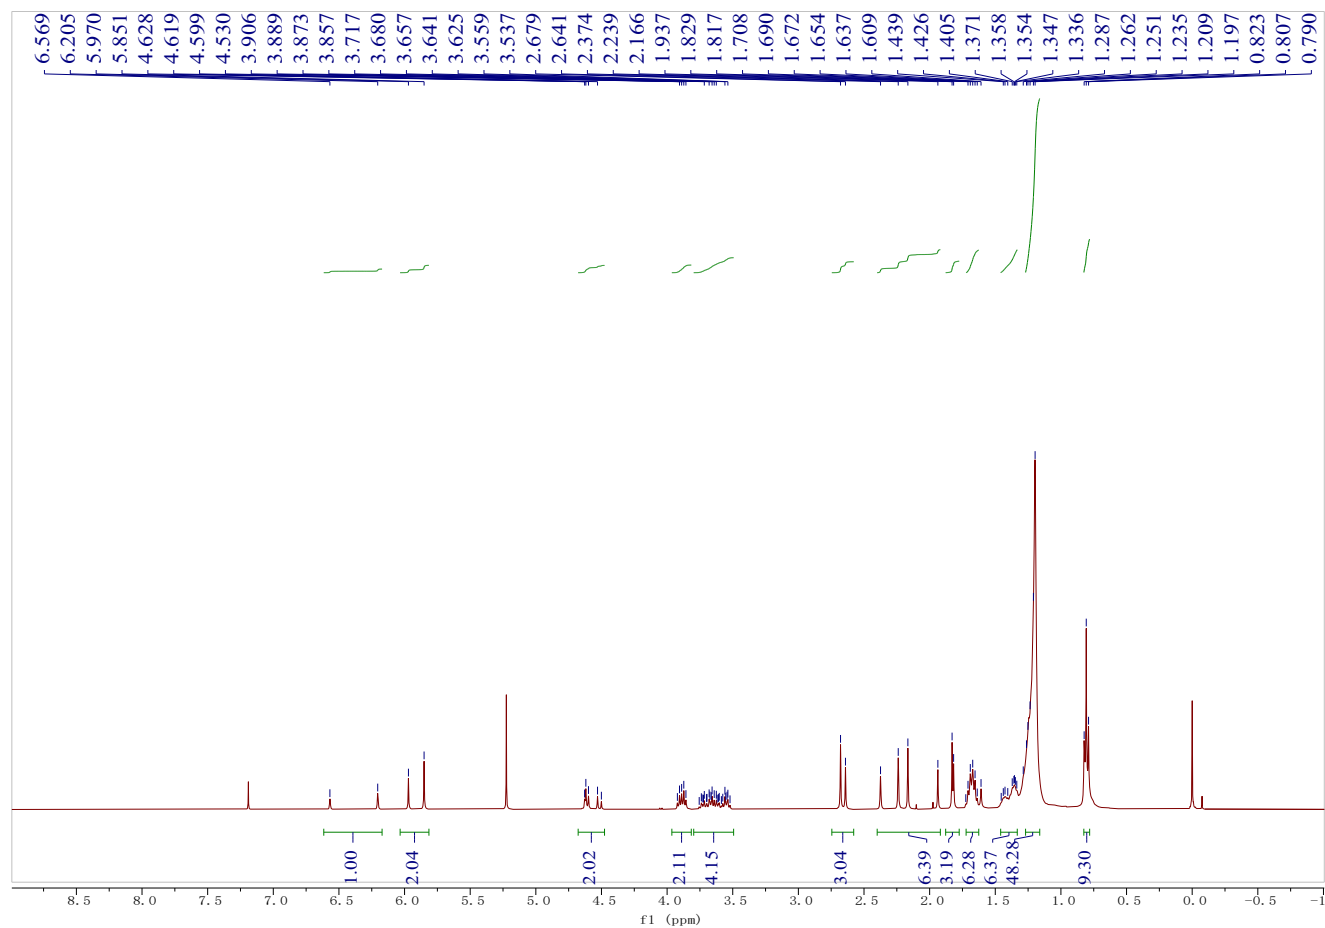

11, <sup>13</sup>C NMR, 101 MHz, CDCl<sub>3</sub>

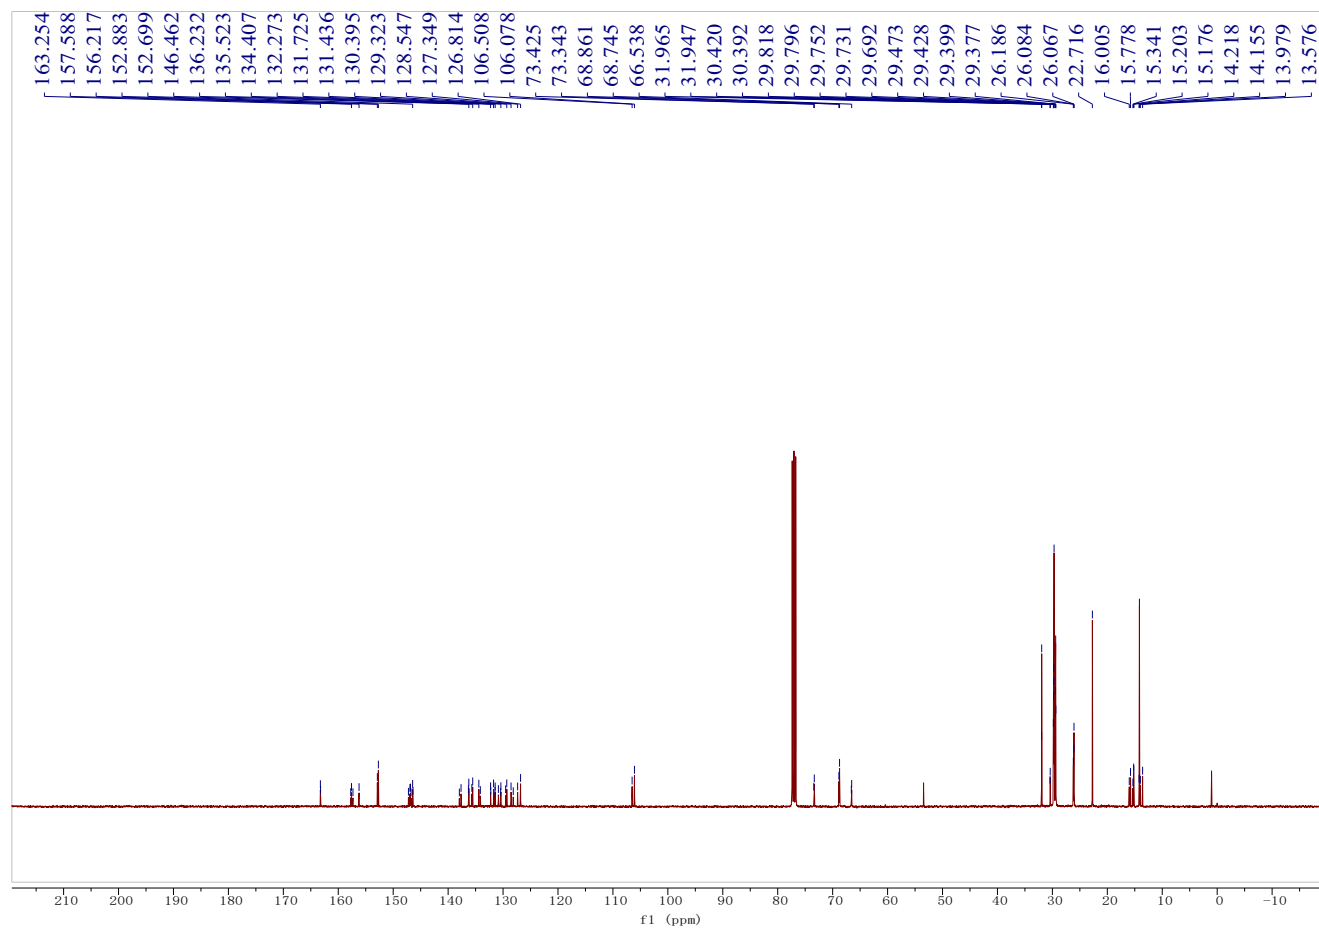

13, <sup>1</sup>H NMR, 400 MHz, CDCl<sub>3</sub>

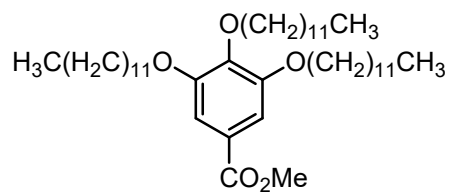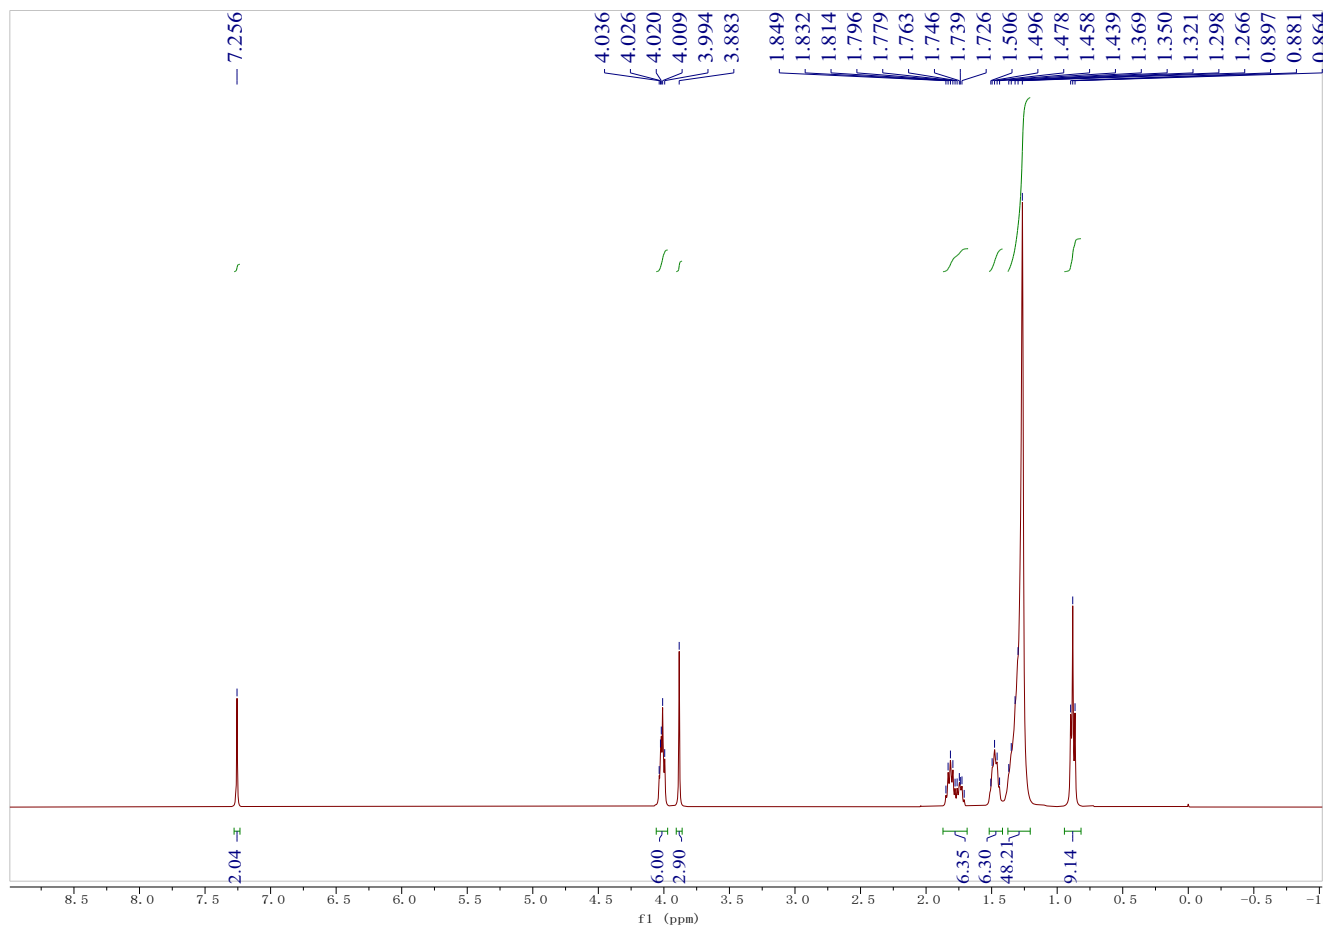

**$^{13}\text{C}$  NMR, 101 MHz,  $\text{CDCl}_3$**

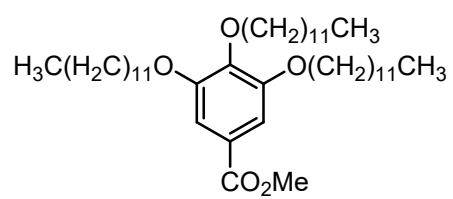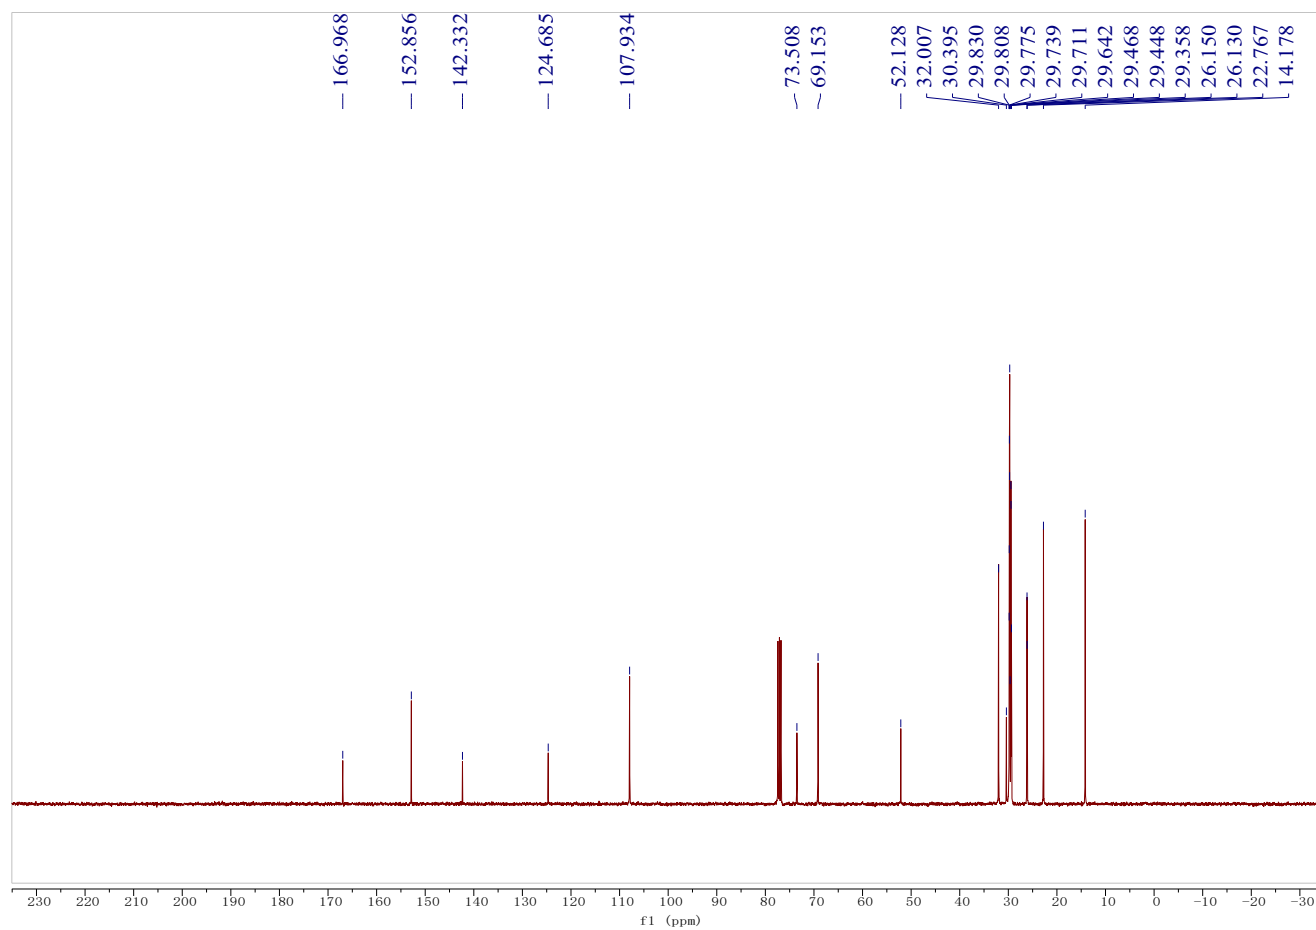

14, <sup>1</sup>H NMR, 400 MHz, CDCl<sub>3</sub>

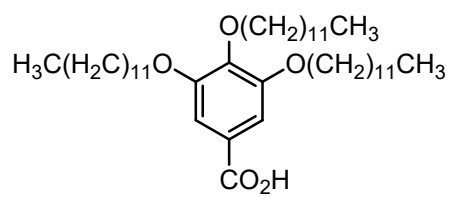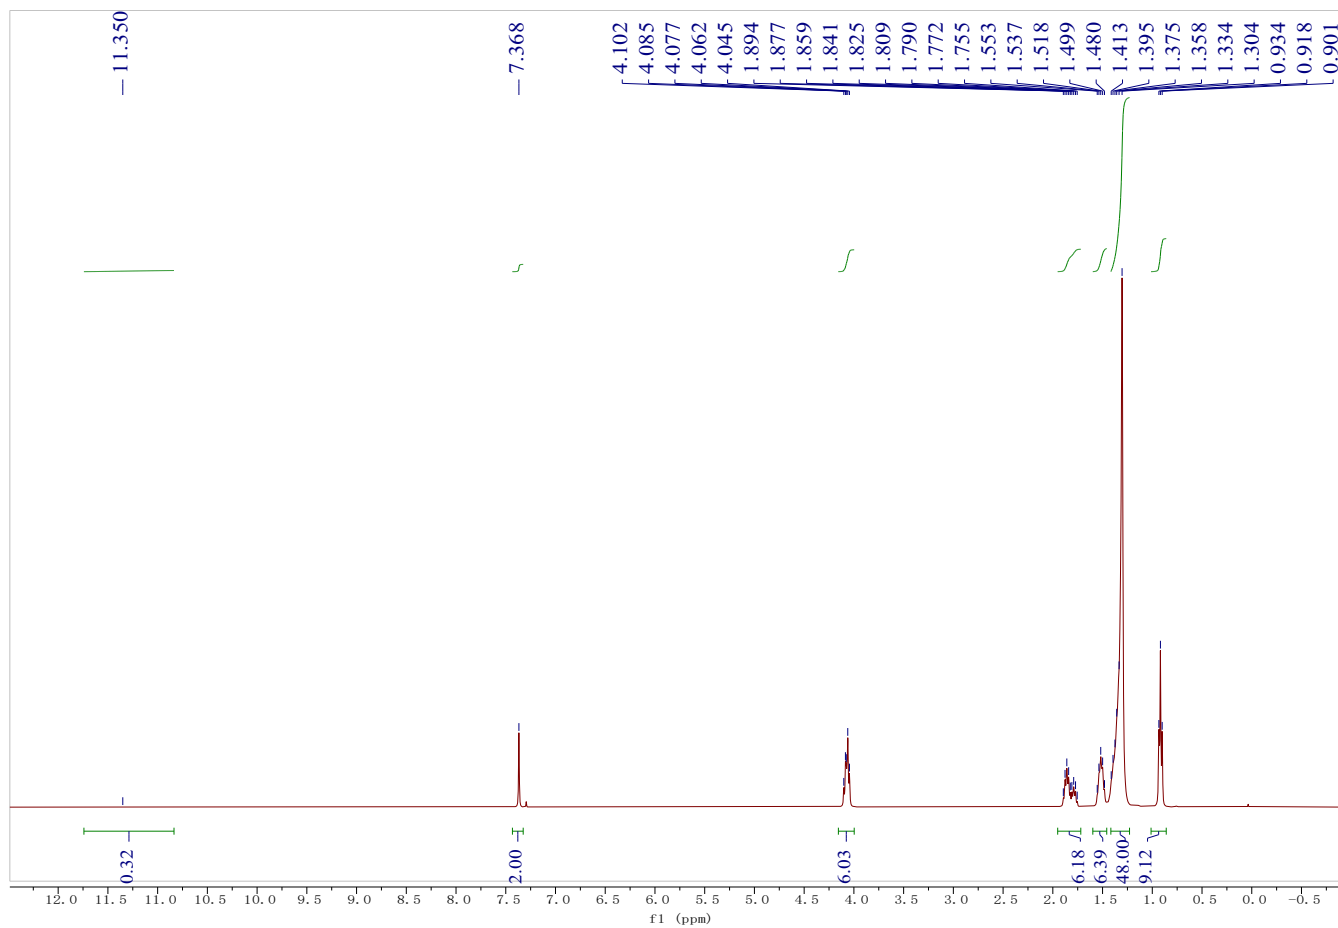

14, <sup>13</sup>C NMR, 101 MHz, CDCl<sub>3</sub>

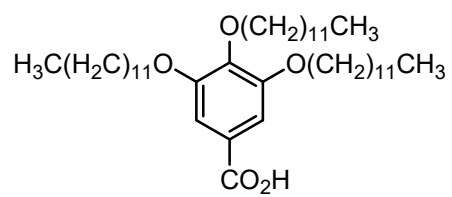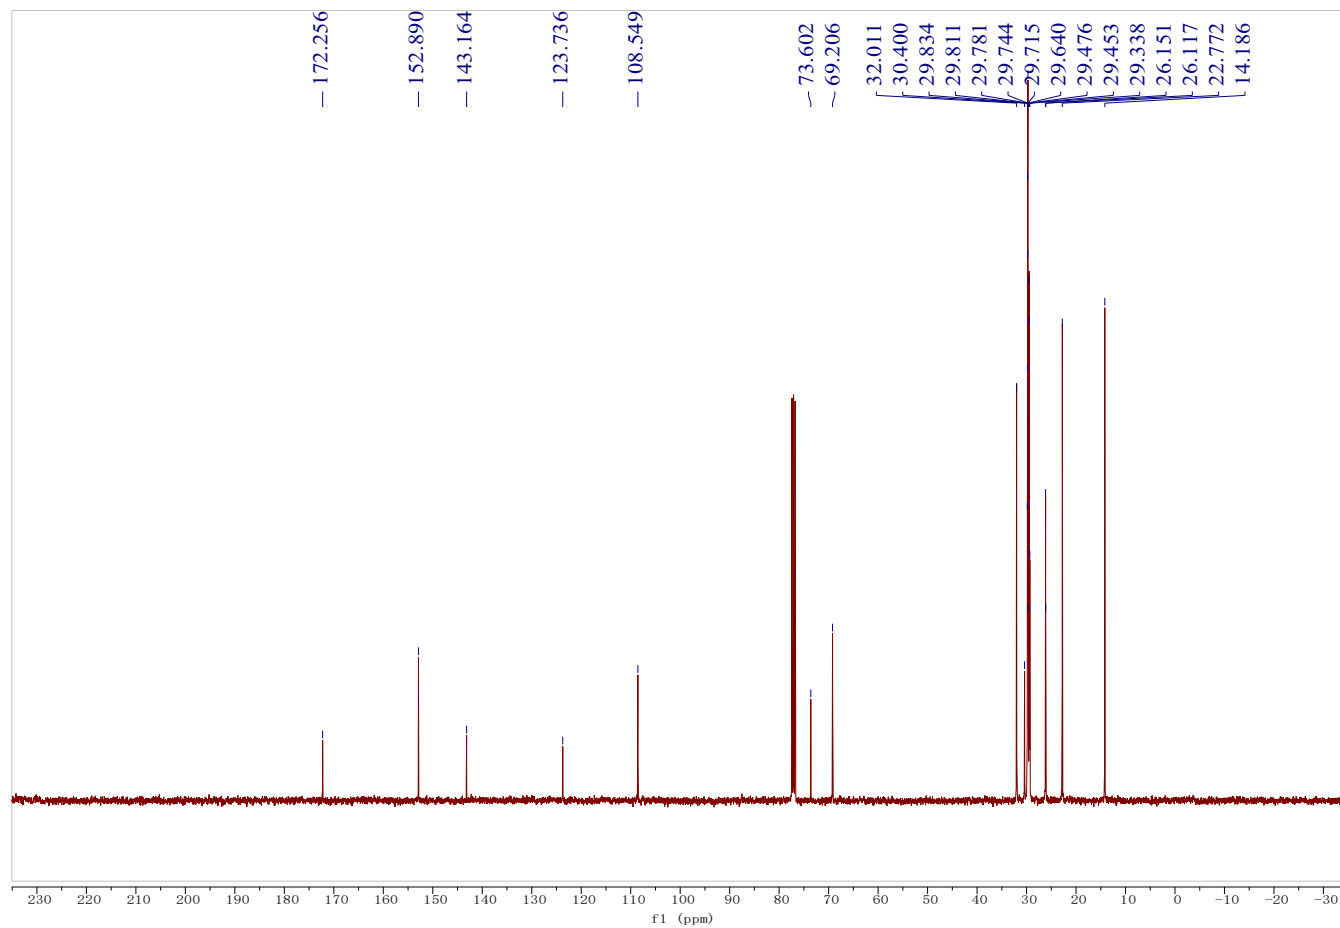



15, <sup>1</sup>H NMR, 400 MHz, CDCl<sub>3</sub>

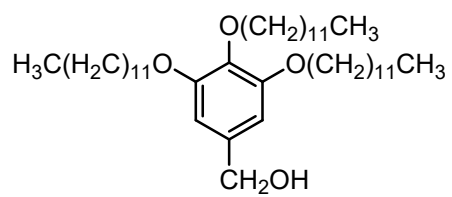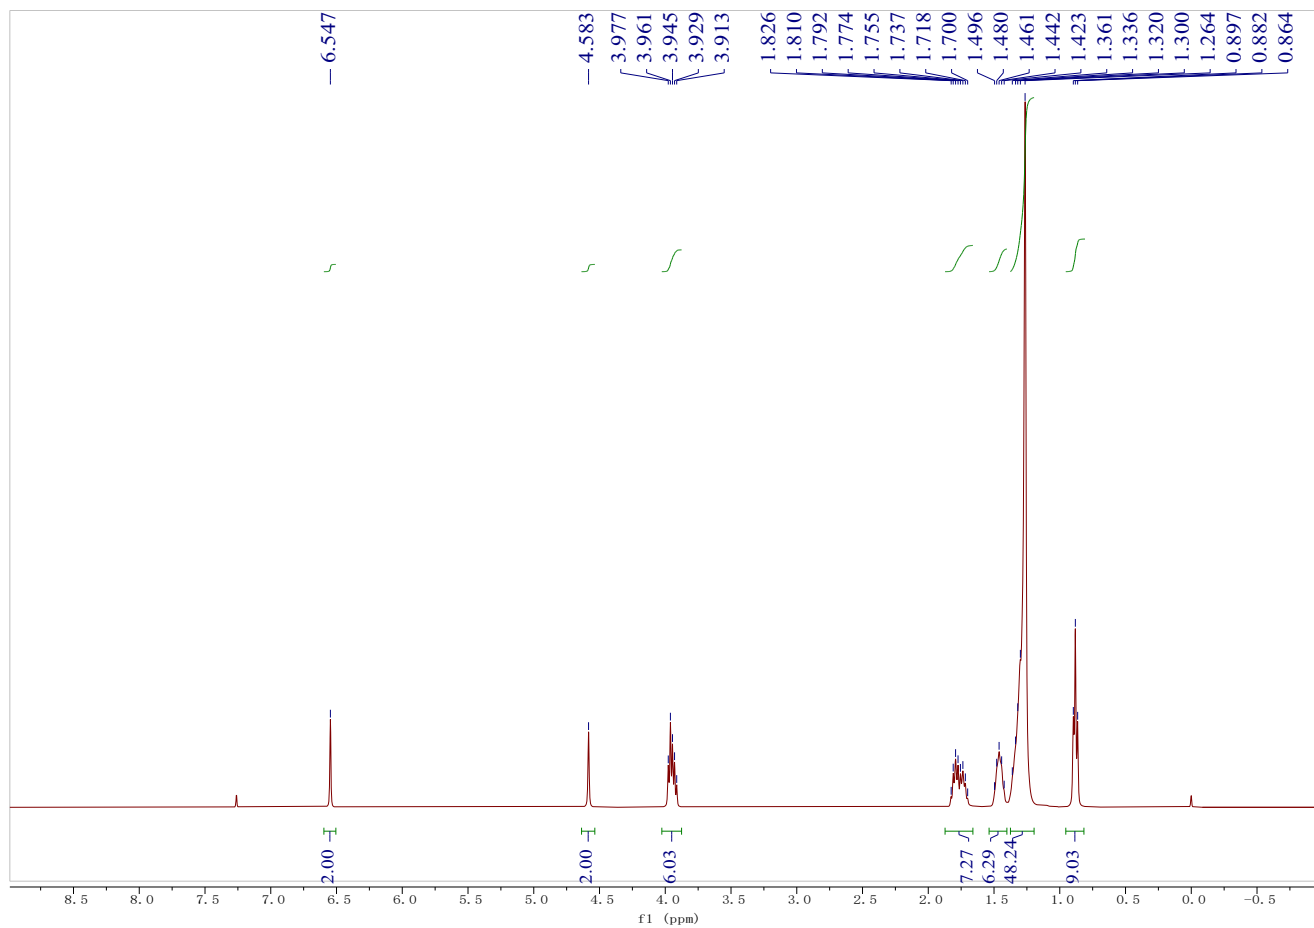

15, <sup>13</sup>C NMR, 101 MHz, CDCl<sub>3</sub>

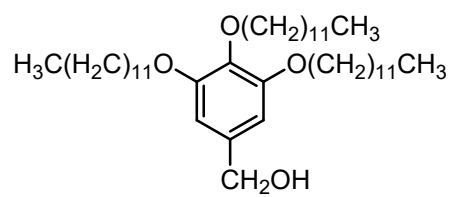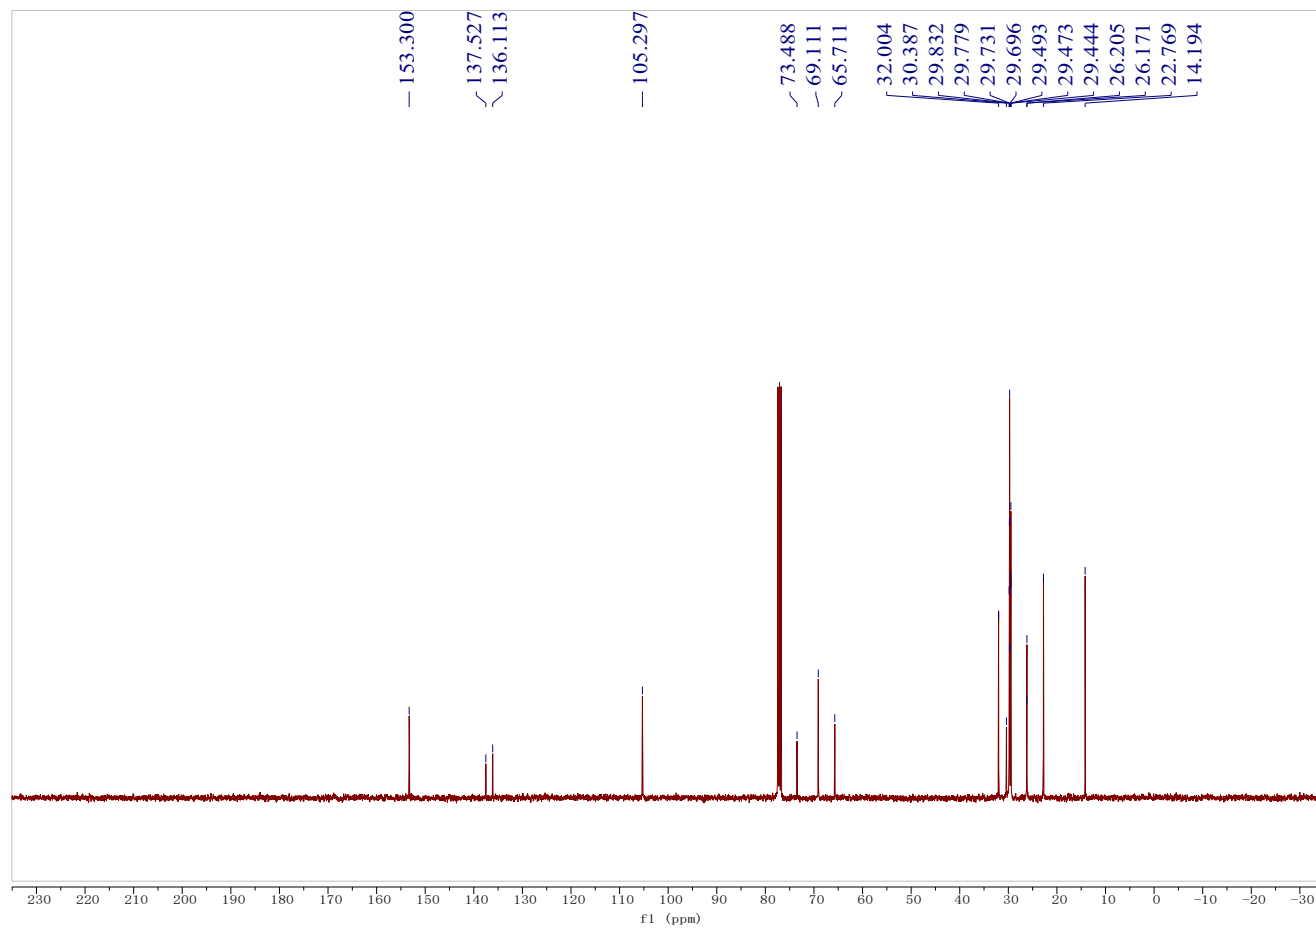

17, <sup>1</sup>H NMR, 400 MHz, CDCl<sub>3</sub>

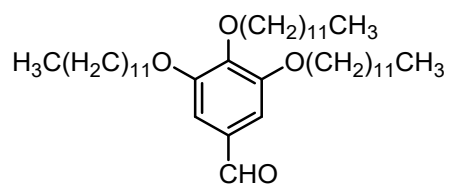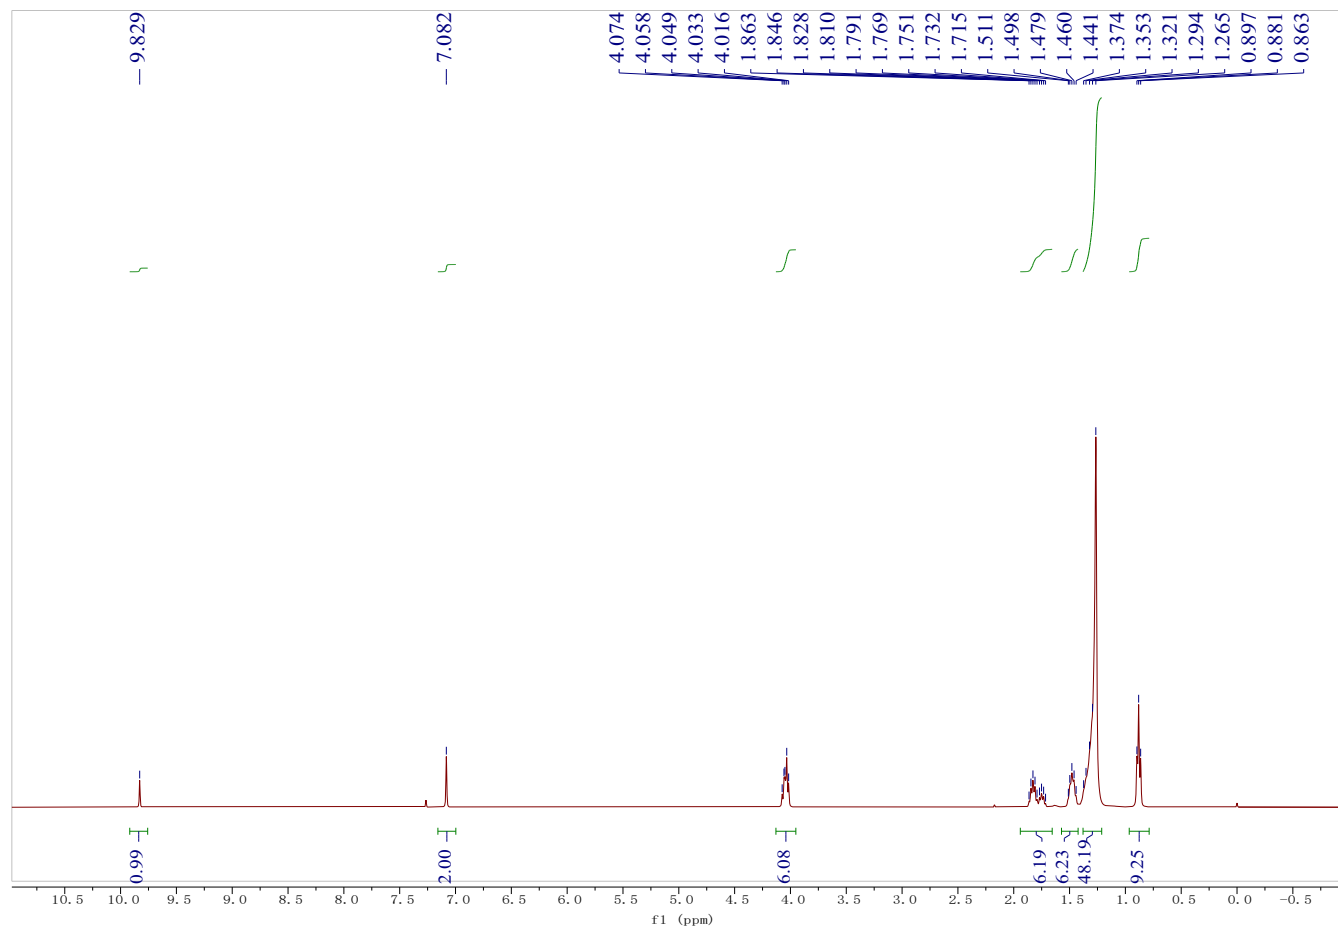

17, <sup>13</sup>C NMR, 101 MHz, CDCl<sub>3</sub>

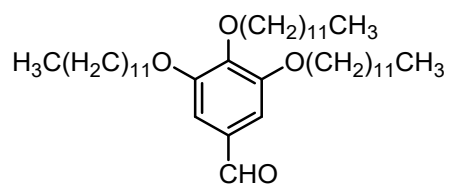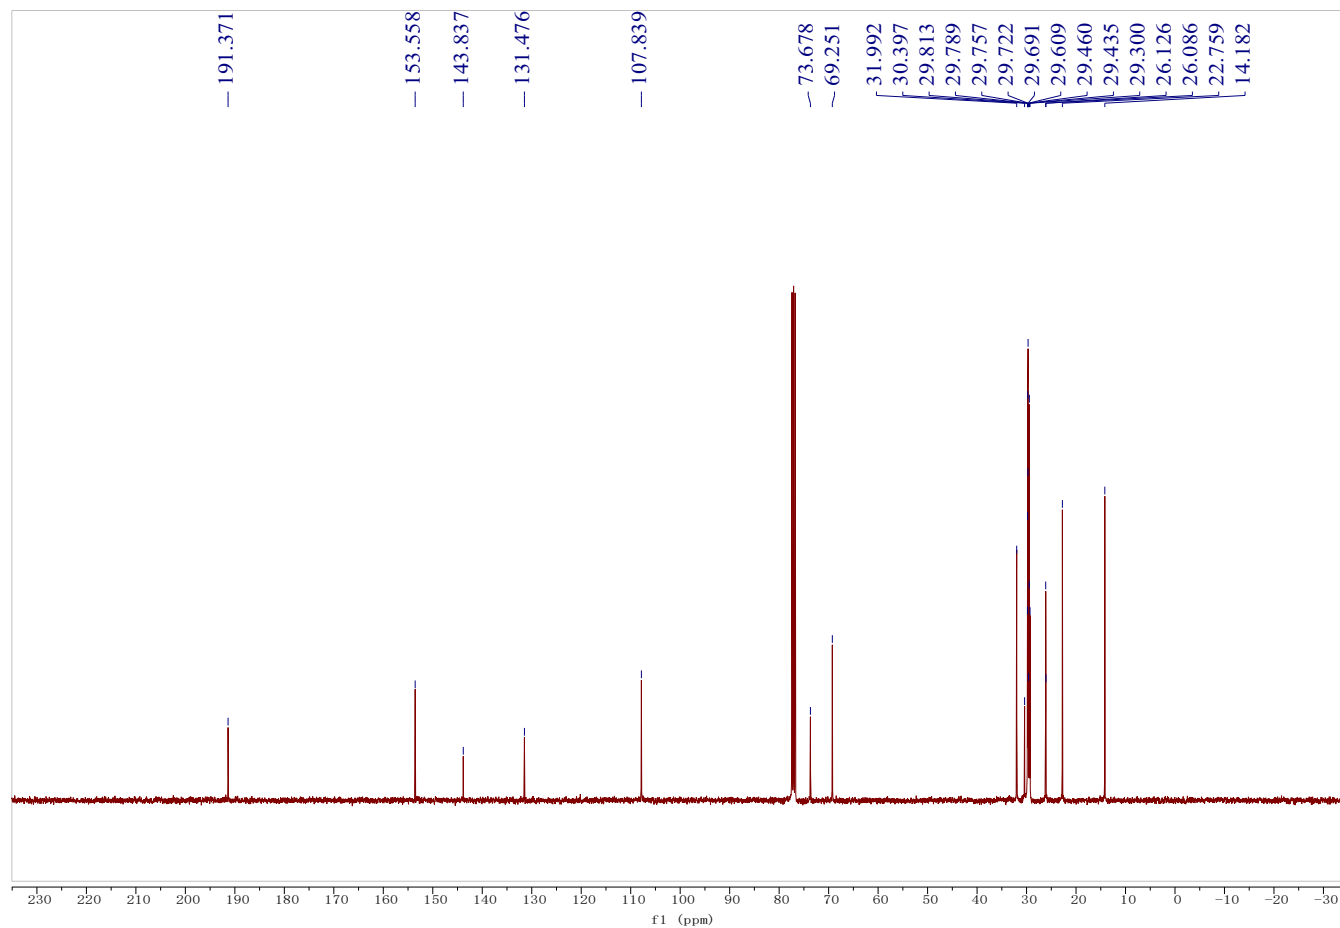

19, <sup>1</sup>H NMR, 400 MHz, CDCl<sub>3</sub>

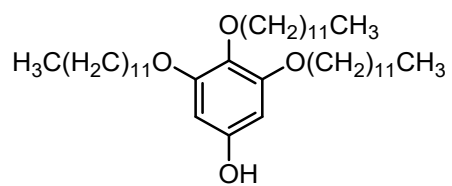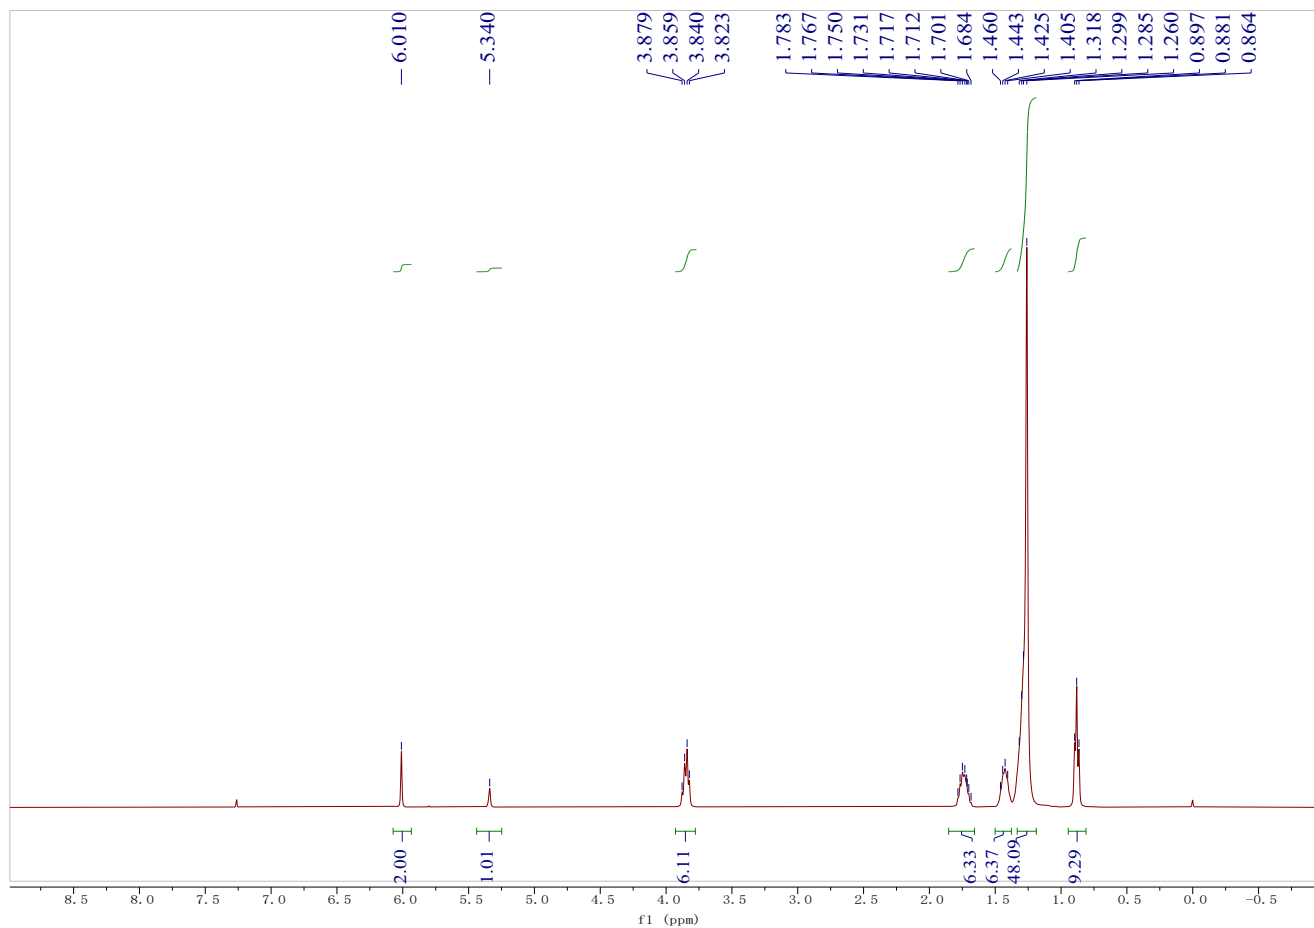

19, <sup>13</sup>C NMR, 101 MHz, CDCl<sub>3</sub>

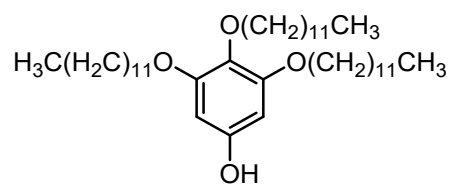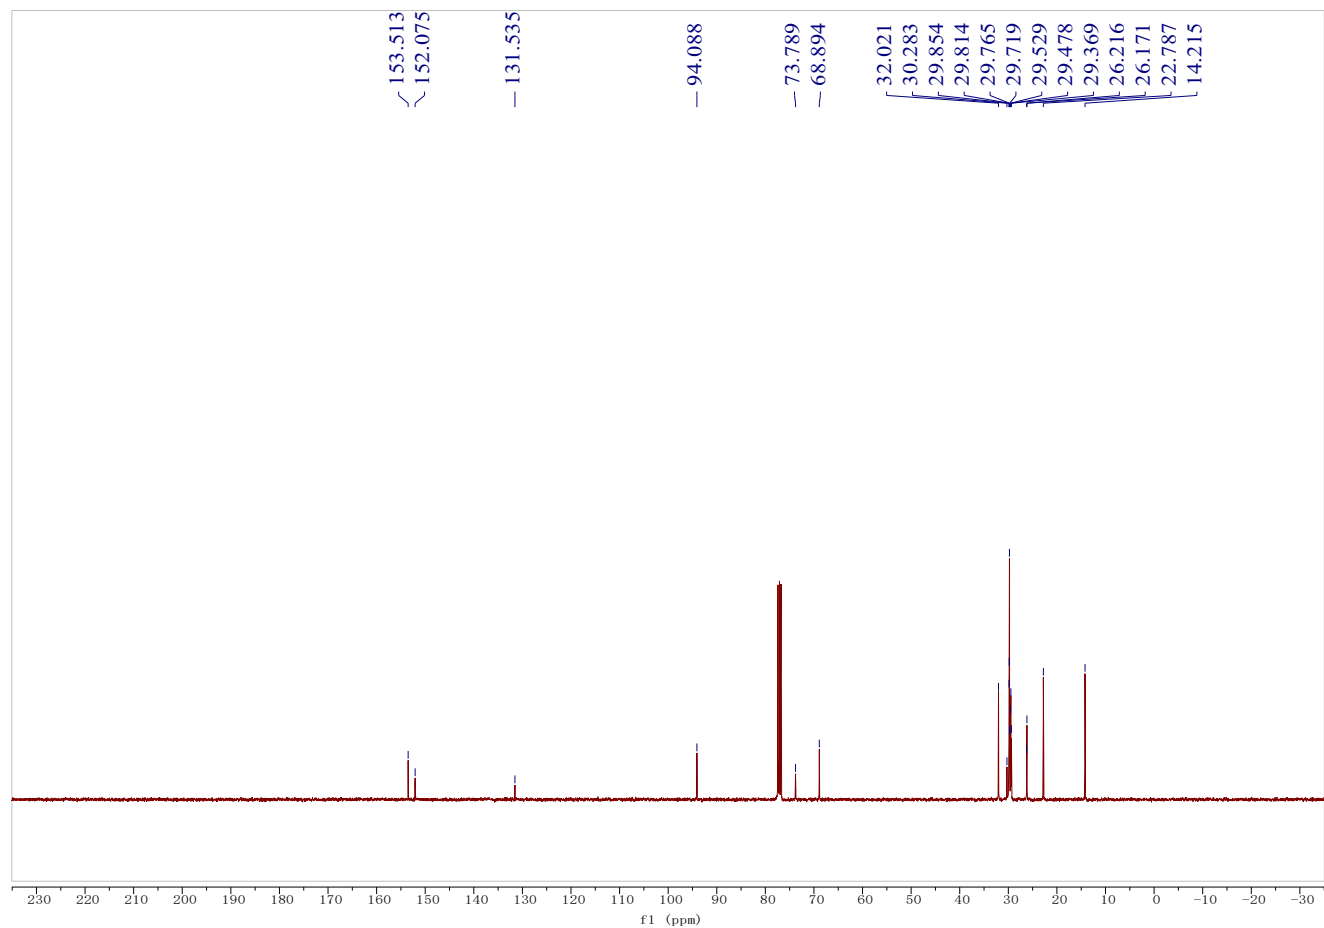

## 9. HPLC Charts

3a: IF-3, Hex/iPrOH=97/3, rate=1.000 mL/min, 254 nm

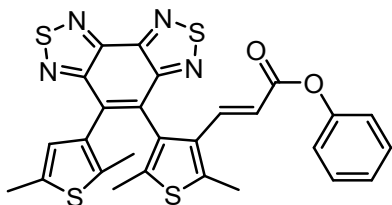

### <Chromatogram>

mAU

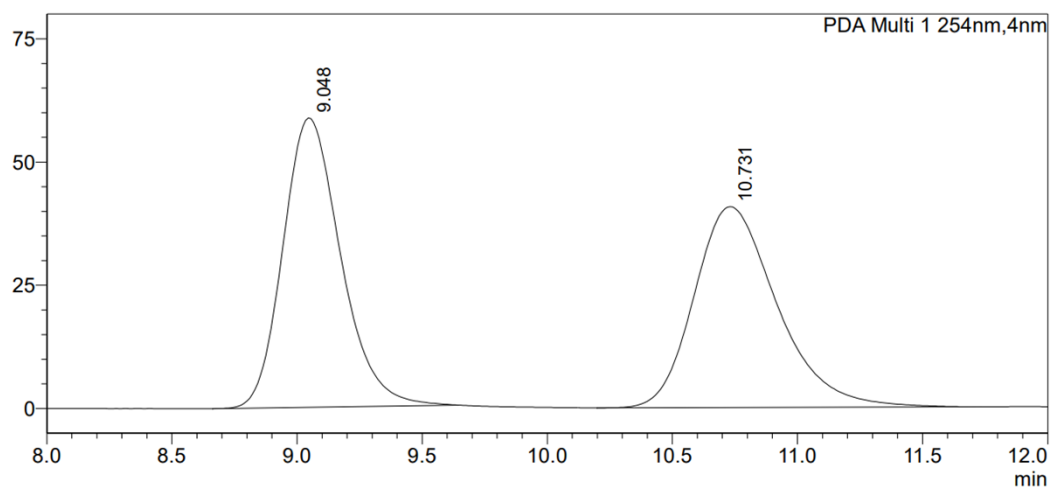

### <Peak Table>

PDA Ch1 254nm

| Peak# | Ret. Time | Area    | Height | Area%   |
|-------|-----------|---------|--------|---------|
| 1     | 9.048     | 942165  | 58655  | 50.071  |
| 2     | 10.731    | 939498  | 40745  | 49.929  |
| Total |           | 1881663 | 99400  | 100.000 |

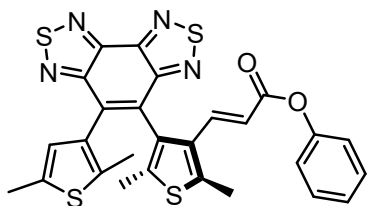

**<Chromatogram>**

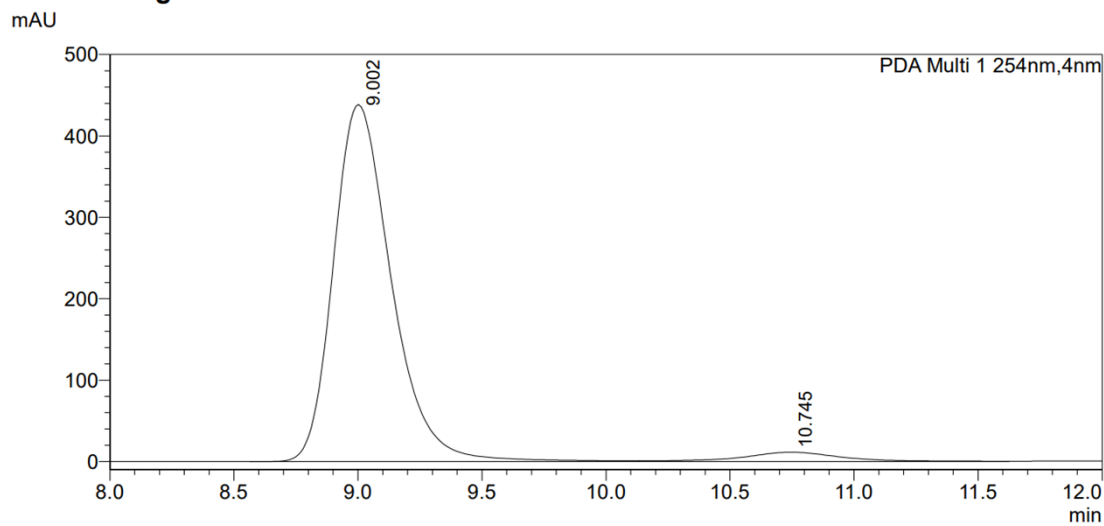

**<Peak Table>**

PDA Ch1 254nm

| Peak# | Ret. Time | Area    | Height | Area%   |
|-------|-----------|---------|--------|---------|
| 1     | 9.002     | 7121299 | 438560 | 95.649  |
| 2     | 10.745    | 323968  | 11437  | 4.351   |
| Total |           | 7445267 | 449997 | 100.000 |



3b: IF-3, Hex/iPrOH=97/3, rate=1.000 mL/min, 254 nm

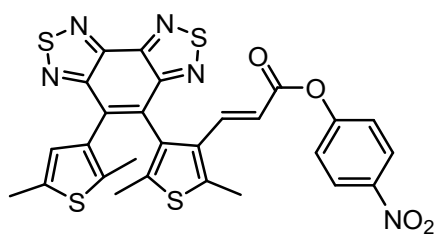

<Chromatogram>

mAU

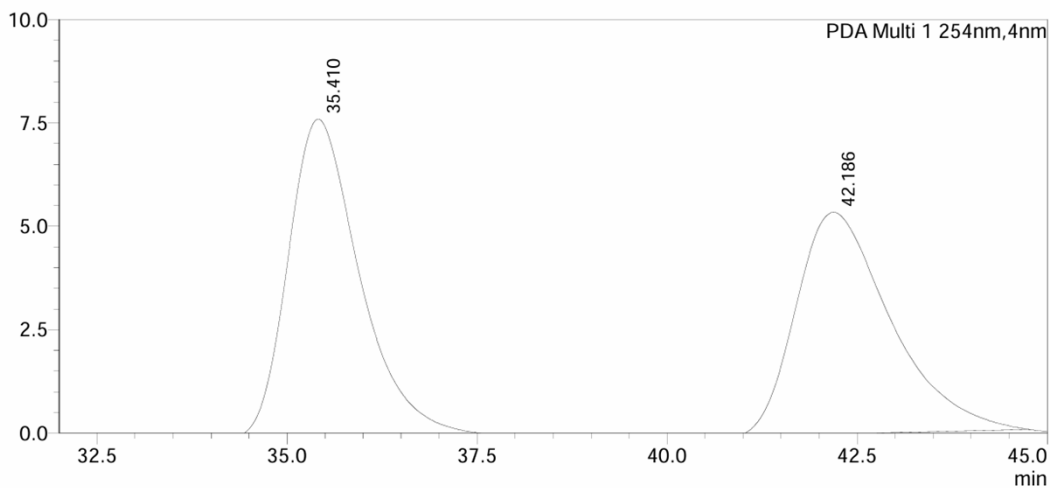

<Peak Table>

PDA Ch1 254nm

| Peak# | Ret. Time | Area   | Height | Area%   |
|-------|-----------|--------|--------|---------|
| 1     | 35.410    | 501022 | 7673   | 51.863  |
| 2     | 42.186    | 465034 | 5368   | 48.137  |
| Total |           | 966056 | 13041  | 100.000 |

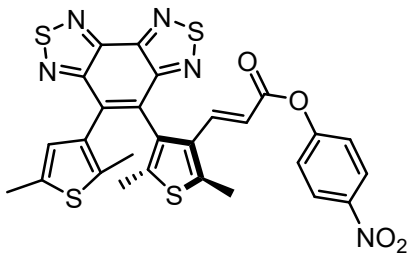

<Chromatogram>

mAU

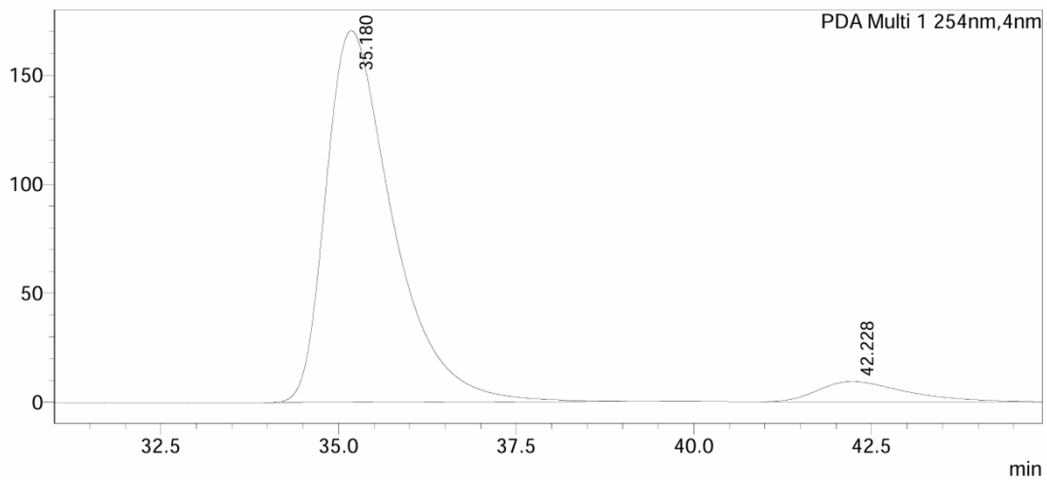

<Peak Table>

PDA Ch1 254nm

| Peak# | Ret. Time | Area     | Height | Area%   |
|-------|-----------|----------|--------|---------|
| 1     | 35.180    | 11169174 | 170491 | 93.293  |
| 2     | 42.228    | 802972   | 9243   | 6.707   |
| Total |           | 11972146 | 179734 | 100.000 |

3c: IF-3, Hex/iPrOH=90/10, rate=1.000 mL/min, 254 nm

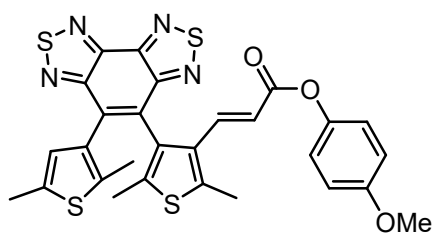

<Chromatogram>

mV

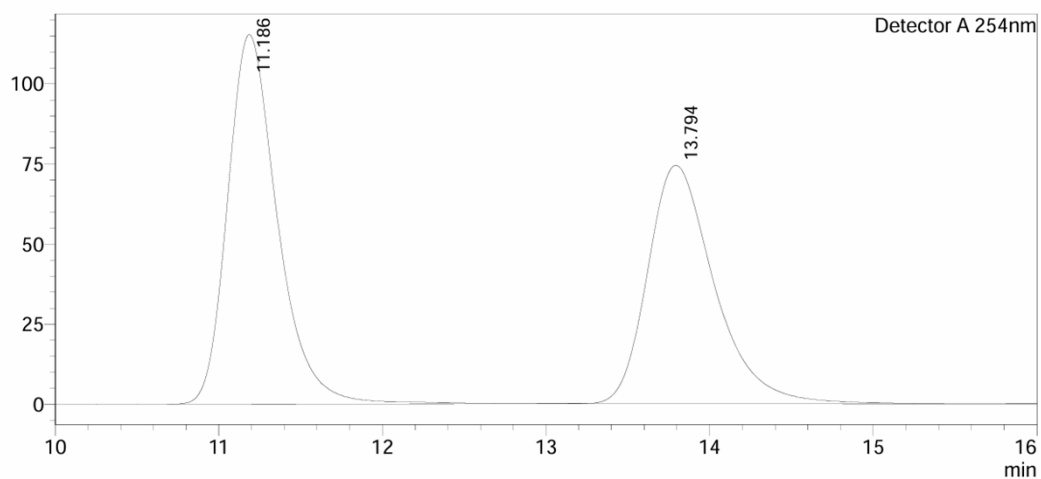

<Peak Table>

Detector A 254nm

| Peak# | Ret. Time | Area    | Height | Conc.  |
|-------|-----------|---------|--------|--------|
| 1     | 11.186    | 2449638 | 115293 | 53.472 |
| 2     | 13.794    | 2131520 | 74453  | 46.528 |
| Total |           | 4581159 | 189746 |        |

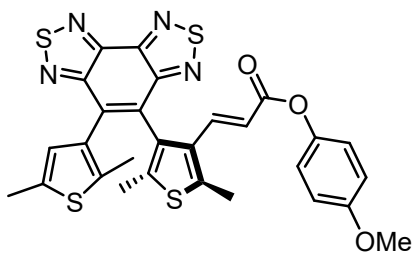

**<Chromatogram>**

mV

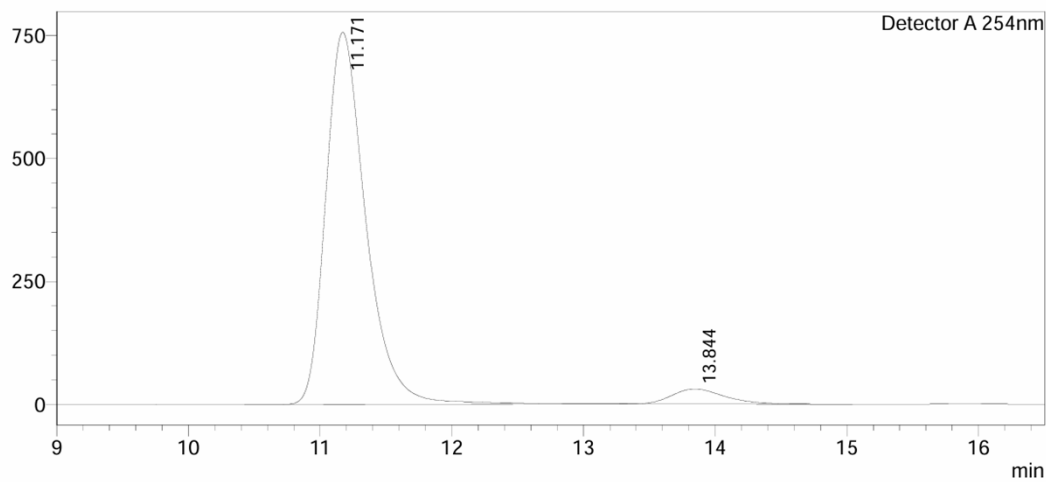

**<Peak Table>**

Detector A 254nm

| Peak# | Ret. Time | Area     | Height | Conc.  |
|-------|-----------|----------|--------|--------|
| 1     | 11.171    | 16017930 | 756244 | 94.799 |
| 2     | 13.844    | 878761   | 30919  | 5.201  |
| Total |           | 16896691 | 787163 |        |

3d: IF-3, Hex/iPrOH=97/3, rate=1.000 mL/min, 254 nm

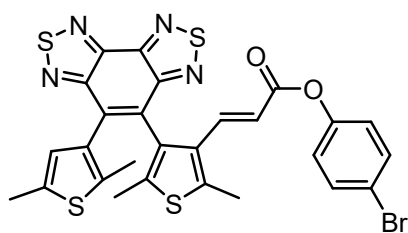

### <Chromatogram>

mAU

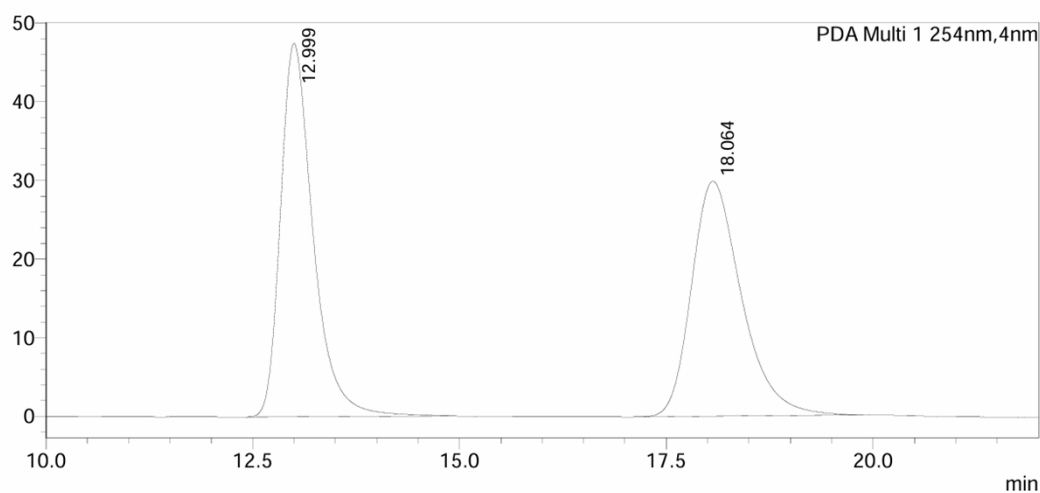

### <Peak Table>

PDA Ch1 254nm

| Peak# | Ret. Time | Area    | Height | Area%   |
|-------|-----------|---------|--------|---------|
| 1     | 12.999    | 1302172 | 47472  | 50.871  |
| 2     | 18.064    | 1257582 | 29873  | 49.129  |
| Total |           | 2559754 | 77345  | 100.000 |

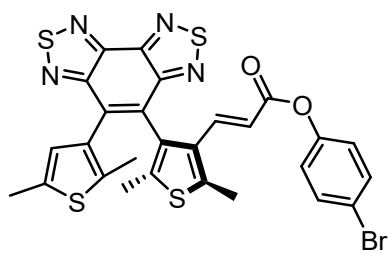

**<Chromatogram>**

mAU

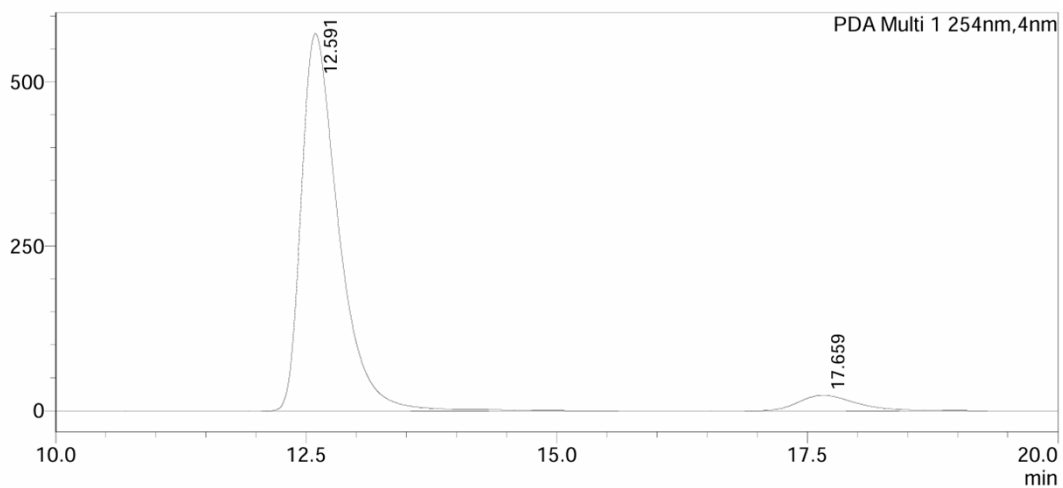

**<Peak Table>**

PDA Ch1 254nm

| Peak# | Ret. Time | Area     | Height | Area%   |
|-------|-----------|----------|--------|---------|
| 1     | 12.591    | 14876806 | 573440 | 93.942  |
| 2     | 17.659    | 959307   | 23736  | 6.058   |
| Total |           | 15836113 | 597176 | 100.000 |

3e: IF-3, Hex/iPrOH=97/3, rate=1.000 mL/min, 254 nm

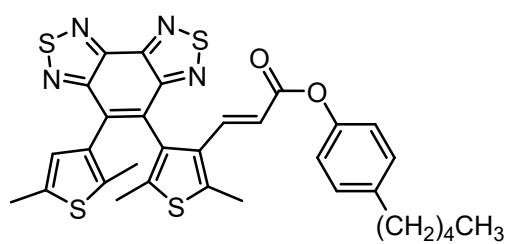

### <Chromatogram>

mAU

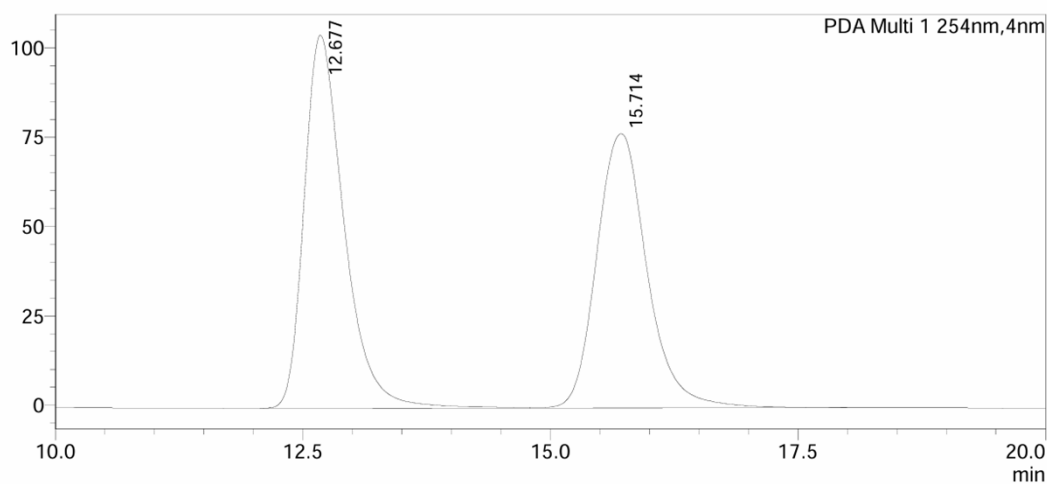

### <Peak Table>

PDA Ch1 254nm

| Peak# | Ret. Time | Area    | Height | Area%   |
|-------|-----------|---------|--------|---------|
| 1     | 12.677    | 2928336 | 104392 | 51.850  |
| 2     | 15.714    | 2719408 | 76798  | 48.150  |
| Total |           | 5647744 | 181190 | 100.000 |

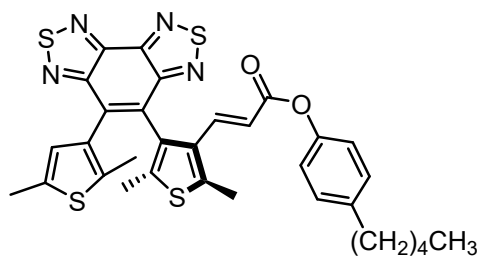

### <Chromatogram>

mAU

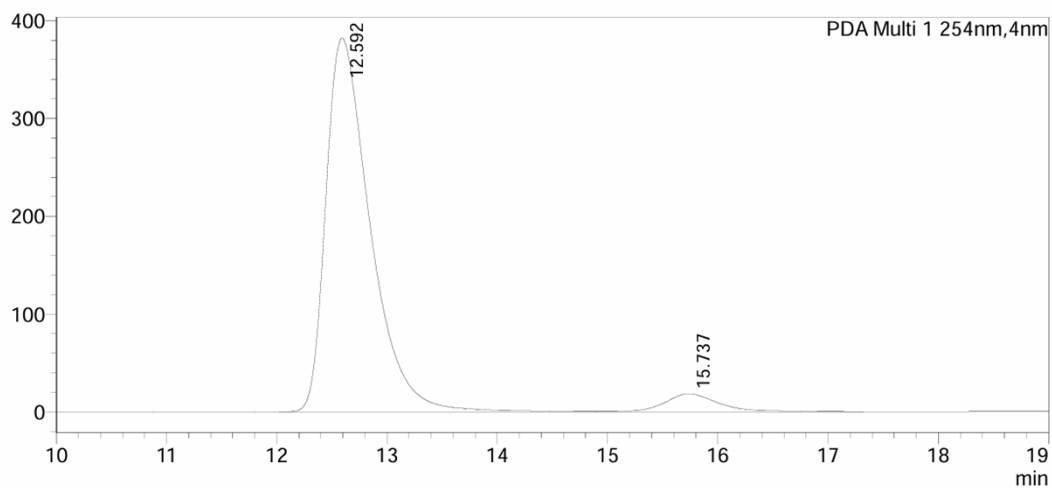

### <Peak Table>

PDA Ch1 254nm

| Peak# | Ret. Time | Area     | Height | Area%   |
|-------|-----------|----------|--------|---------|
| 1     | 12.592    | 10675119 | 382122 | 94.429  |
| 2     | 15.737    | 629829   | 18316  | 5.571   |
| Total |           | 11304948 | 400437 | 100.000 |



3f: IF-3, Hex/iPrOH=97/3, rate=1.000 mL/min, 254 nm

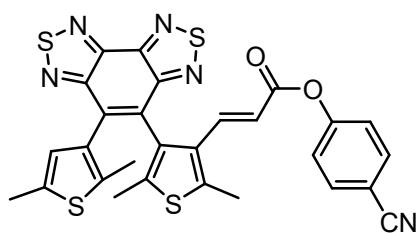

<Chromatogram>

mAU

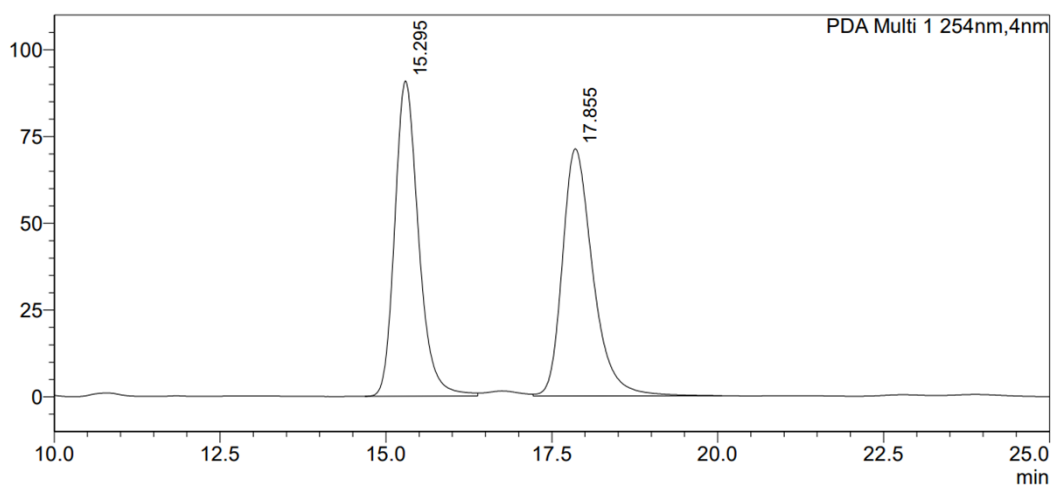

<Peak Table>

PDA Ch1 254nm

| Peak# | Ret. Time | Area    | Height | Area%   |
|-------|-----------|---------|--------|---------|
| 1     | 15.295    | 2270552 | 90807  | 49.892  |
| 2     | 17.855    | 2280380 | 71190  | 50.108  |
| Total |           | 4550932 | 161997 | 100.000 |

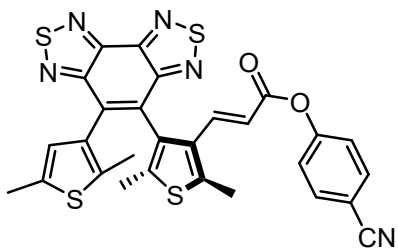

**<Chromatogram>**

mAU

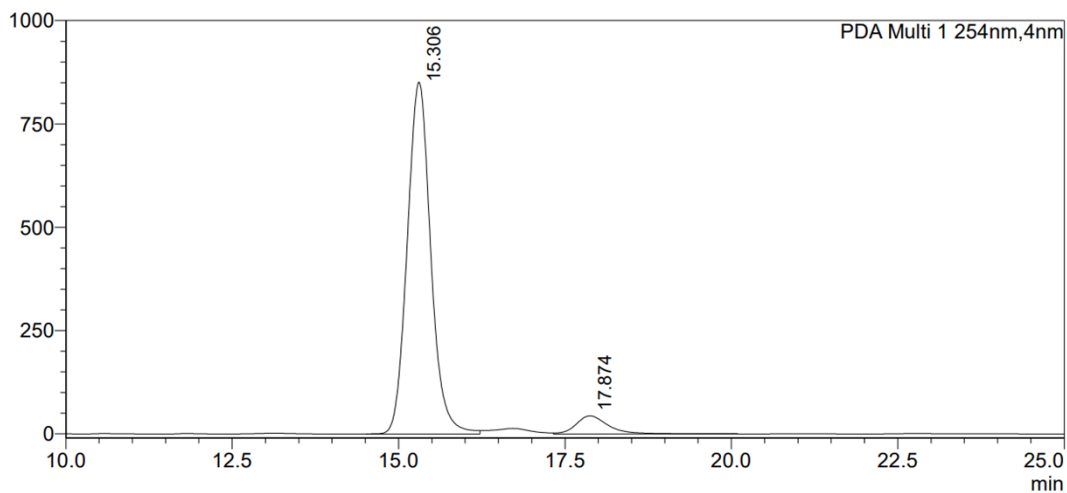

**<Peak Table>**

PDA Ch1 254nm

| Peak# | Ret. Time | Area     | Height | Area%   |
|-------|-----------|----------|--------|---------|
| 1     | 15.306    | 20933276 | 851157 | 93.419  |
| 2     | 17.874    | 1474598  | 43767  | 6.581   |
| Total |           | 22407873 | 894924 | 100.000 |

3g: IF-3, Hex/iPrOH=97/3, rate=1.000 mL/min, 254 nm

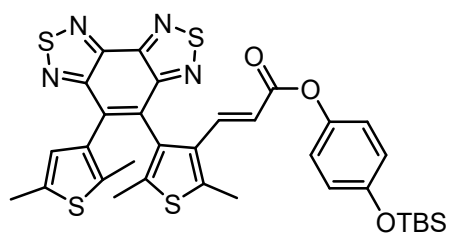

### <Chromatogram>

mAU

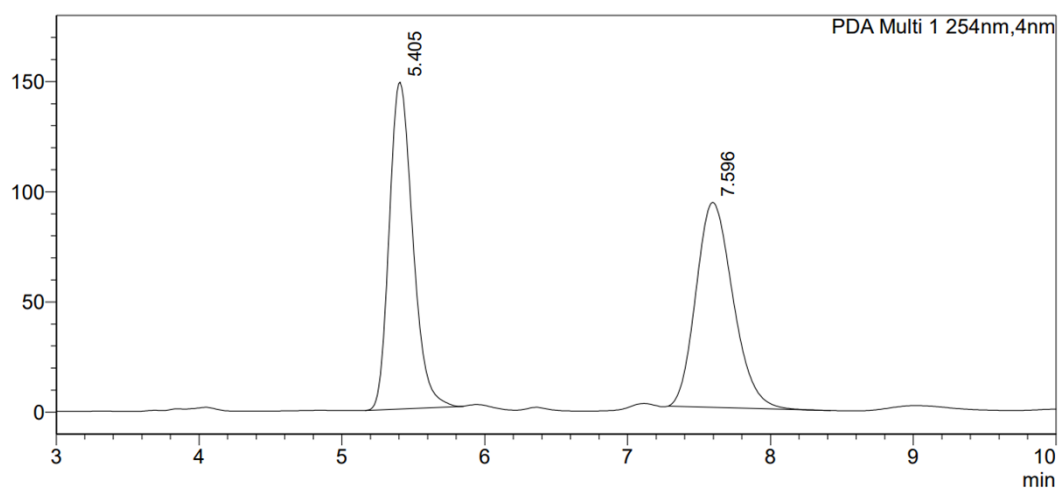

### <Peak Table>

PDA Ch1 254nm

| Peak# | Ret. Time | Area    | Height | Area%   |
|-------|-----------|---------|--------|---------|
| 1     | 5.405     | 1697497 | 148354 | 50.325  |
| 2     | 7.596     | 1675591 | 93012  | 49.675  |
| Total |           | 3373088 | 241366 | 100.000 |

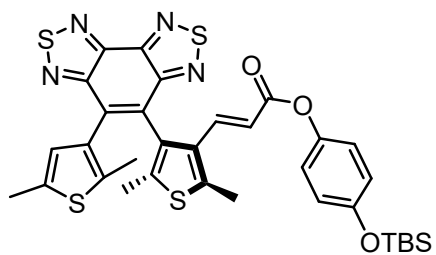

**<Chromatogram>**

mAU

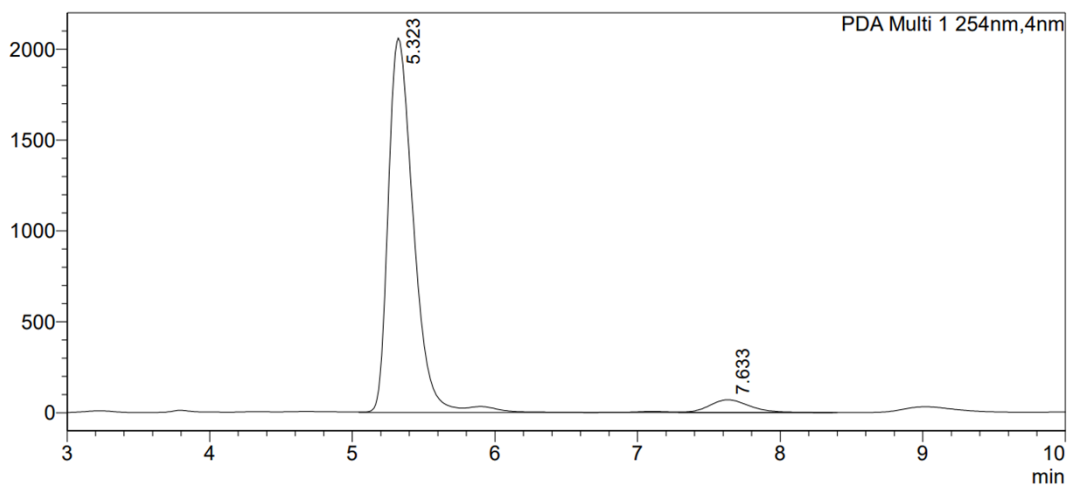

**<Peak Table>**

PDA Ch1 254nm

| Peak# | Ret. Time | Area     | Height  | Area%   |
|-------|-----------|----------|---------|---------|
| 1     | 5.323     | 25528969 | 2060232 | 94.996  |
| 2     | 7.633     | 1344707  | 69379   | 5.004   |
| Total |           | 26873676 | 2129611 | 100.000 |

3h: IF-3, Hex/iPrOH=97/3, rate=1.000 mL/min, 254 nm

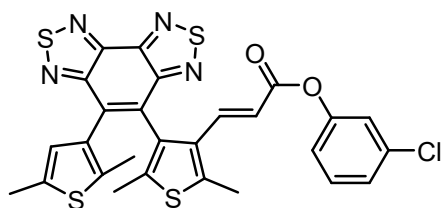

<Chromatogram>

mAU

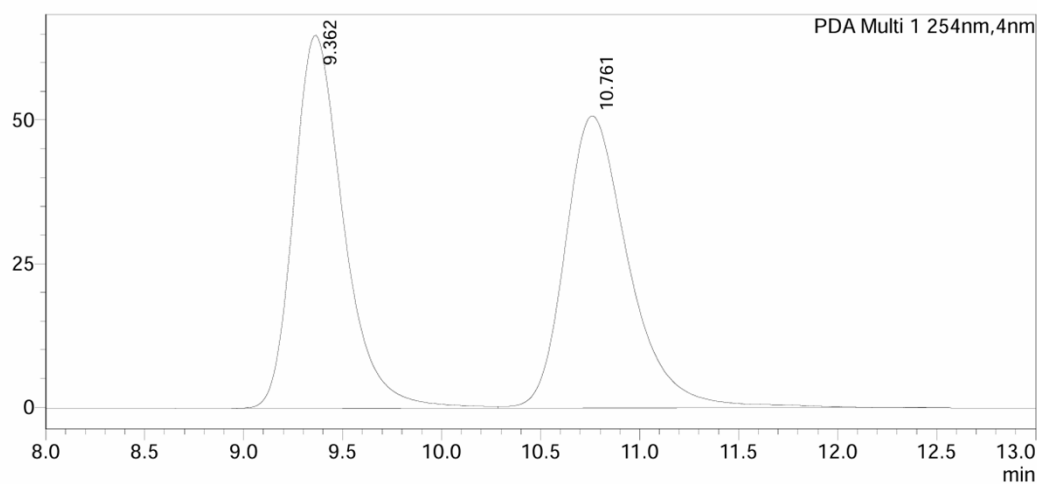

<Peak Table>

PDA Ch1 254nm

| Peak# | Ret. Time | Area    | Height | Area%   |
|-------|-----------|---------|--------|---------|
| 1     | 9.362     | 1136200 | 64908  | 49.889  |
| 2     | 10.761    | 1141252 | 50879  | 50.111  |
| Total |           | 2277452 | 115786 | 100.000 |

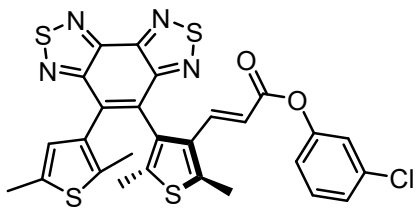

<Chromatogram>

mAU

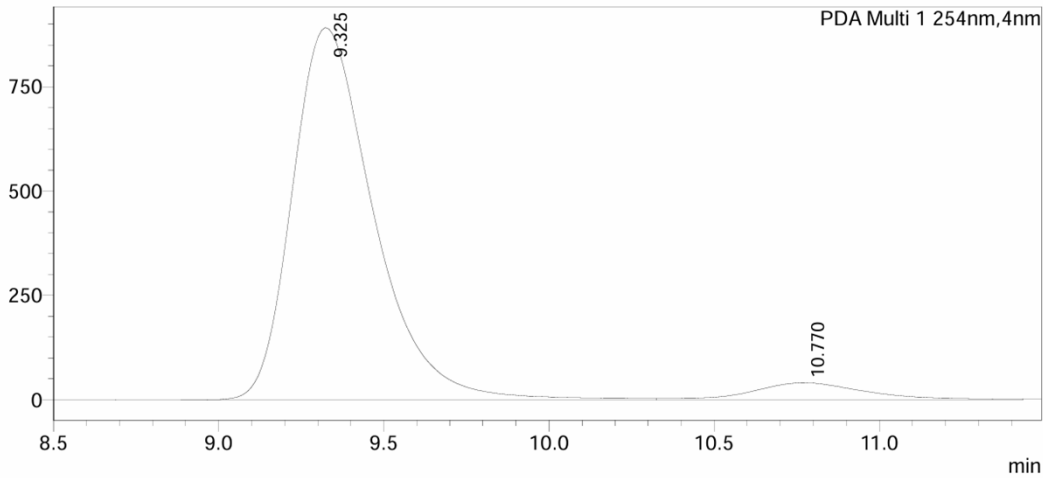

<Peak Table>

PDA Ch1 254nm

| Peak# | Ret. Time | Area     | Height | Area%   |
|-------|-----------|----------|--------|---------|
| 1     | 9.325     | 15274658 | 891281 | 94.084  |
| 2     | 10.770    | 960533   | 40618  | 5.916   |
| Total |           | 16235191 | 931899 | 100.000 |

3i: IBN-5, Hex/iPrOH=90/10, rate=1.000 mL/min, 254 nm

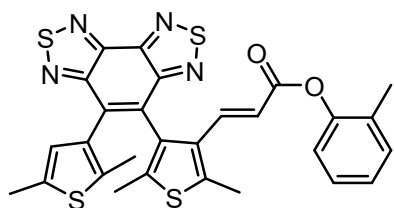

<Chromatogram>

mAU

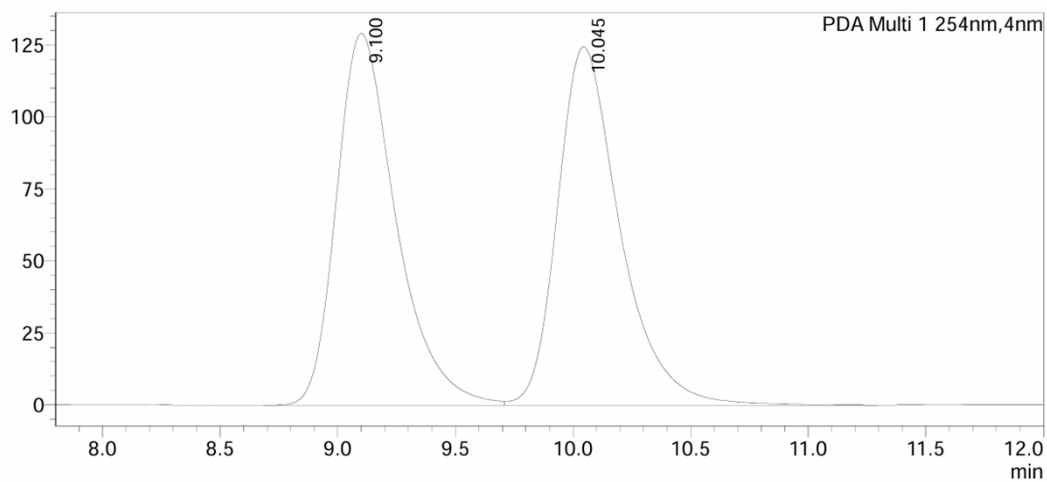

<Peak Table>

PDA Ch1 254nm

| Peak# | Ret. Time | Area    | Height | Area%   |
|-------|-----------|---------|--------|---------|
| 1     | 9.100     | 2275026 | 129158 | 49.699  |
| 2     | 10.045    | 2302580 | 124517 | 50.301  |
| Total |           | 4577606 | 253675 | 100.000 |

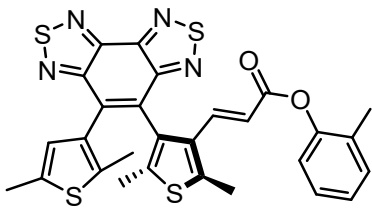

**<Chromatogram>**

mAU

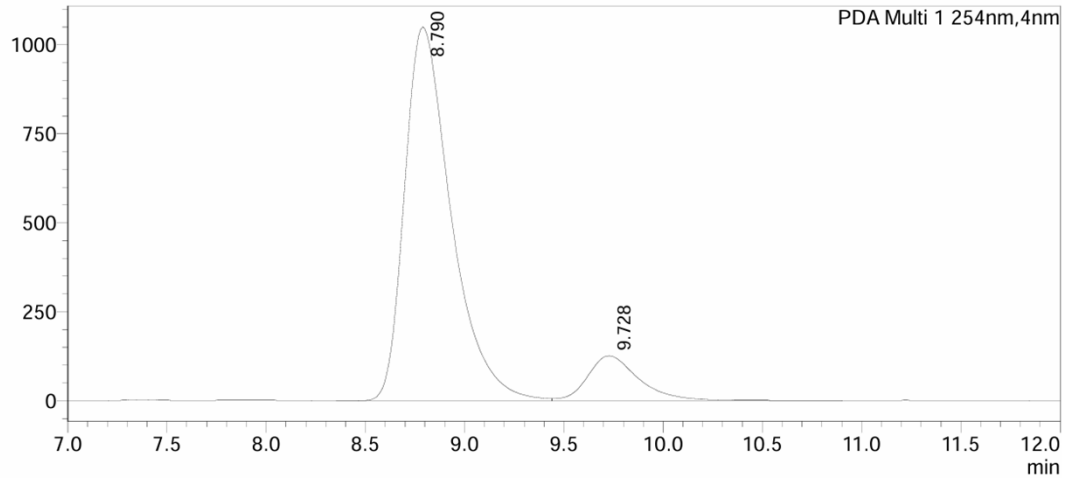

**<Peak Table>**

PDA Ch1 254nm

| Peak# | Ret. Time | Area     | Height  | Area%   |
|-------|-----------|----------|---------|---------|
| 1     | 8.790     | 17144496 | 1050333 | 88.275  |
| 2     | 9.728     | 2277143  | 126241  | 11.725  |
| Total |           | 19421639 | 1176573 | 100.000 |



3j: IF-3, Hex/iPrOH=97/3, rate=1.000 mL/min, 254 nm

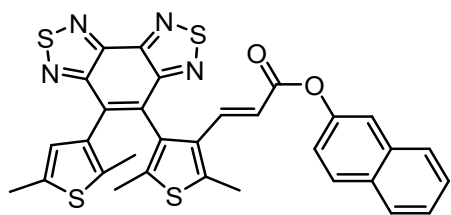

<Chromatogram>

mAU

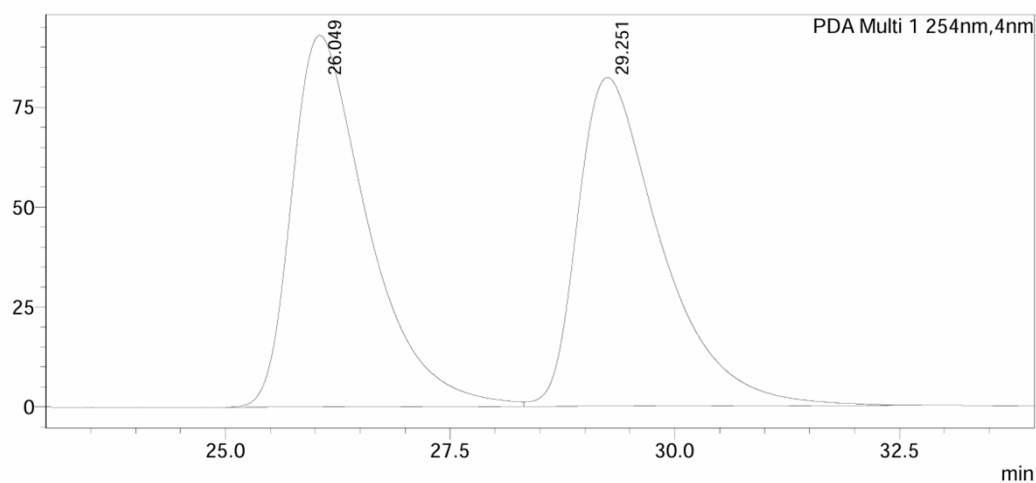

<Peak Table>

PDA Ch1 254nm

| Peak# | Ret. Time | Area     | Height | Area%   |
|-------|-----------|----------|--------|---------|
| 1     | 26.049    | 5495915  | 93036  | 50.715  |
| 2     | 29.251    | 5340845  | 82270  | 49.285  |
| Total |           | 10836761 | 175306 | 100.000 |

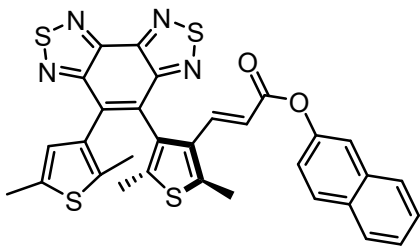

<Chromatogram>

mAU

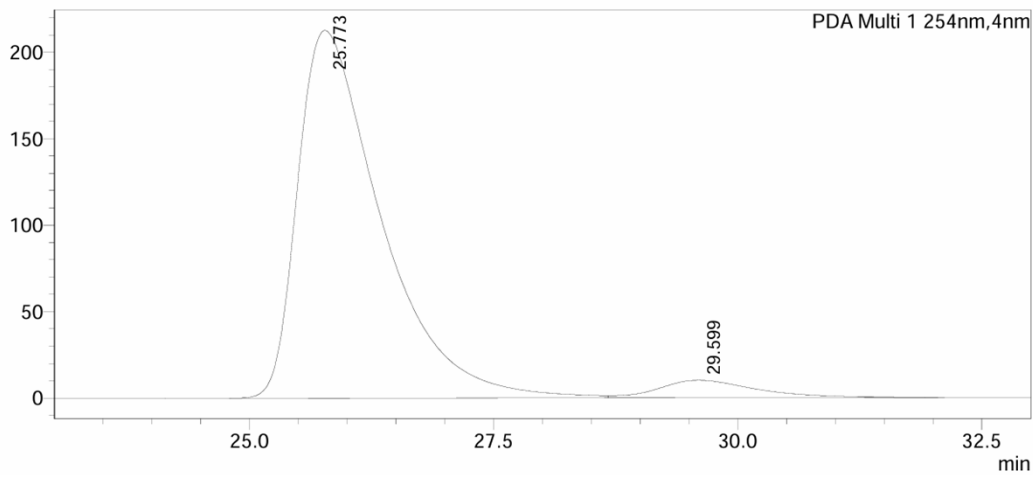

<Peak Table>

PDA Ch1 254nm

| Peak# | Ret. Time | Area     | Height | Area%   |
|-------|-----------|----------|--------|---------|
| 1     | 25.773    | 12658764 | 212739 | 94.699  |
| 2     | 29.599    | 708618   | 10194  | 5.301   |
| Total |           | 13367382 | 222932 | 100.000 |

3k: IF-3, Hex/iPrOH=95/5, rate=1.000 mL/min, 254 nm

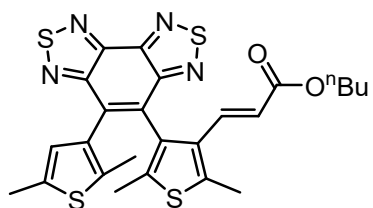

<Chromatogram>

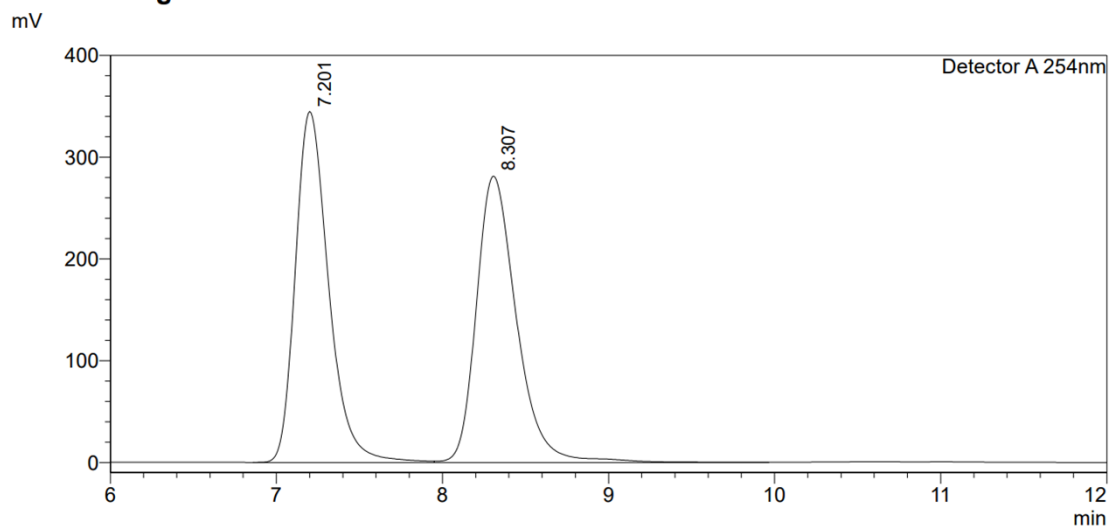

<Peak Table>

Detector A 254nm

| Peak# | Ret. Time | Area    | Height | Area%   |
|-------|-----------|---------|--------|---------|
| 1     | 7.201     | 4819505 | 345095 | 50.408  |
| 2     | 8.307     | 4741411 | 281607 | 49.592  |
| Total |           | 9560917 | 626702 | 100.000 |

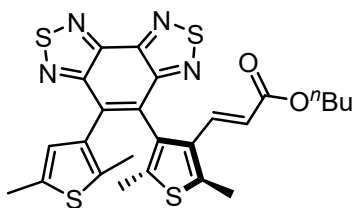

**<Chromatogram>**

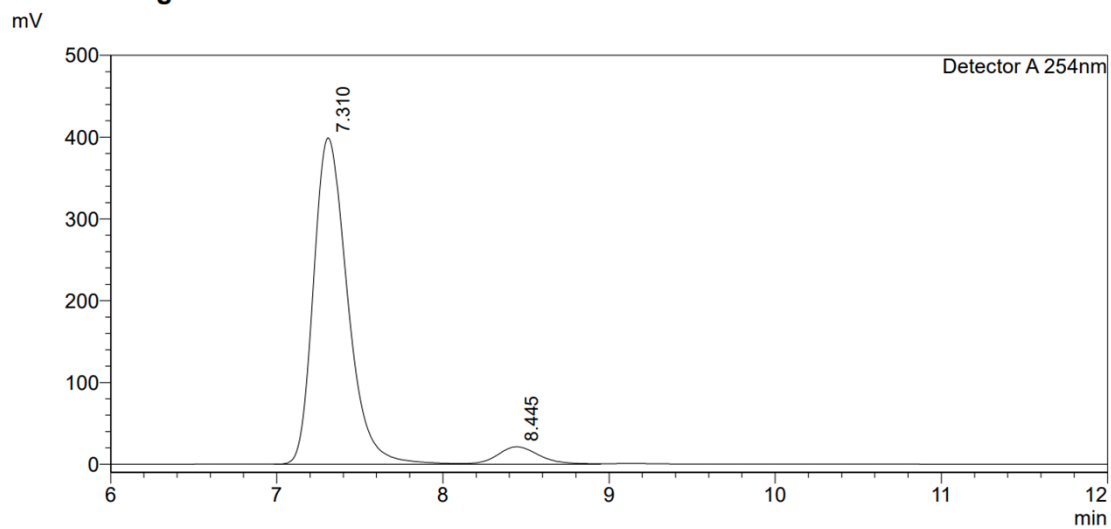

**<Peak Table>**

Detector A 254nm

| Peak# | Ret. Time | Area    | Height | Area%   |
|-------|-----------|---------|--------|---------|
| 1     | 7.310     | 5673231 | 399119 | 93.763  |
| 2     | 8.445     | 377365  | 21333  | 6.237   |
| Total |           | 6050596 | 420452 | 100.000 |

3l: OD-H, Hex/iPrOH=90/10, rate=1.000 mL/min, 254 nm

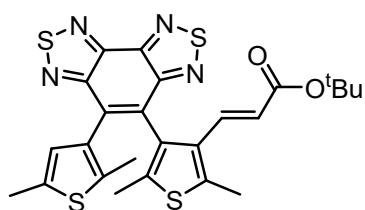

<Chromatogram>

mAU

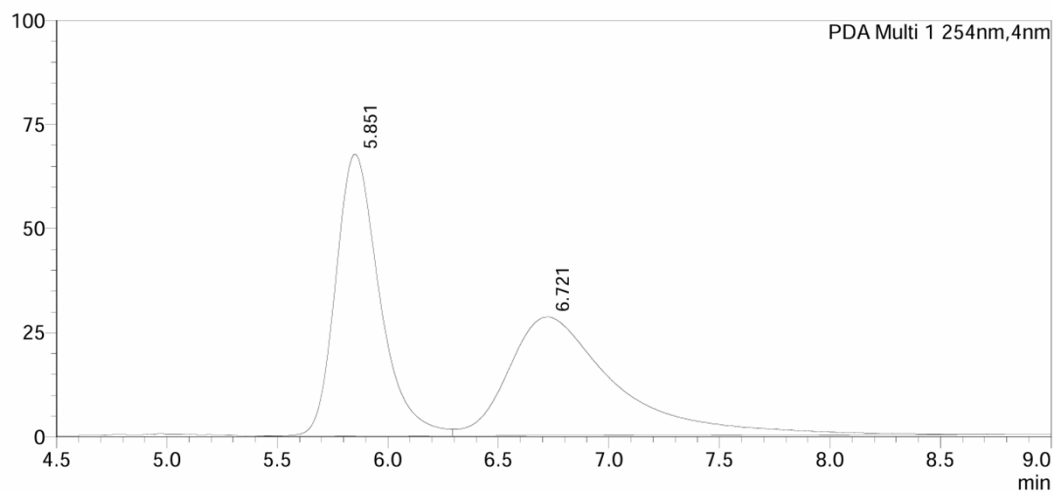

<Peak Table>

PDA Ch1 254nm

| Peak# | Ret. Time | Area    | Height | Area%   |
|-------|-----------|---------|--------|---------|
| 1     | 5.851     | 935354  | 67639  | 49.474  |
| 2     | 6.721     | 955260  | 28469  | 50.526  |
| Total |           | 1890614 | 96108  | 100.000 |

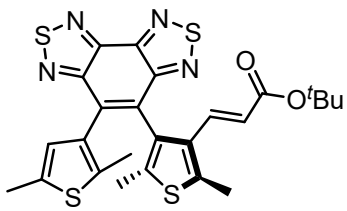

**<Chromatogram>**

mAU

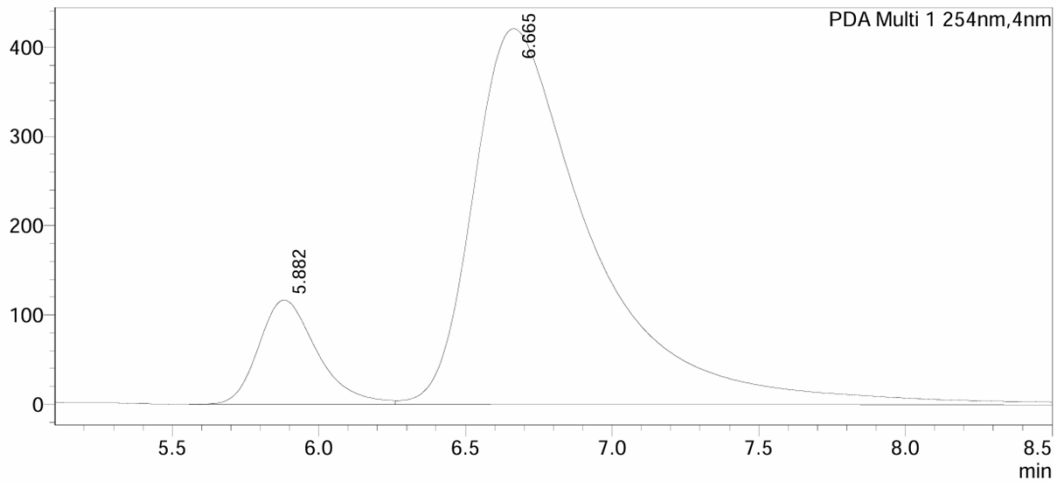

**<Peak Table>**

PDA Ch1 254nm

| Peak# | Ret. Time | Area     | Height | Area%   |
|-------|-----------|----------|--------|---------|
| 1     | 5.882     | 1634430  | 117069 | 11.932  |
| 2     | 6.665     | 12063373 | 421233 | 88.068  |
| Total |           | 13697802 | 538302 | 100.000 |

3m: IF-3, Hex/iPrOH=95/5, rate=0.800 mL/min, 254 nm

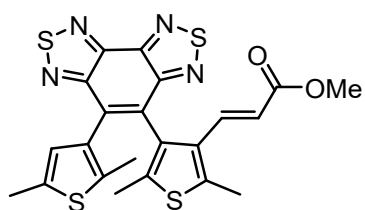

<Chromatogram>

mAU

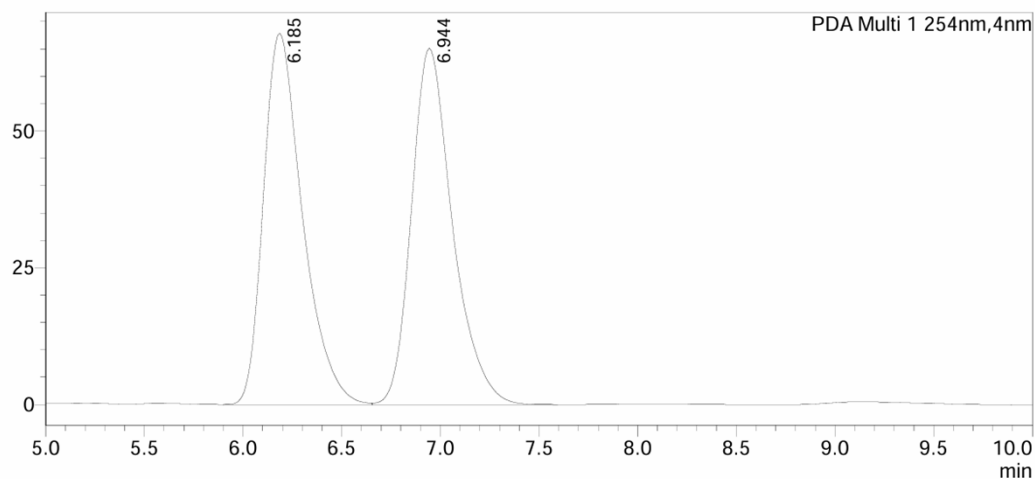

<Peak Table>

PDA Ch1 254nm

| Peak# | Ret. Time | Area    | Height | Area%   |
|-------|-----------|---------|--------|---------|
| 1     | 6.185     | 933057  | 67844  | 49.789  |
| 2     | 6.944     | 940951  | 65107  | 50.211  |
| Total |           | 1874008 | 132951 | 100.000 |

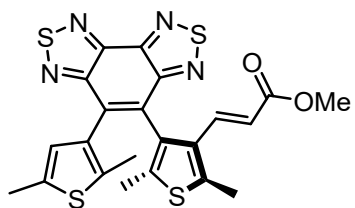

**<Chromatogram>**

mAU

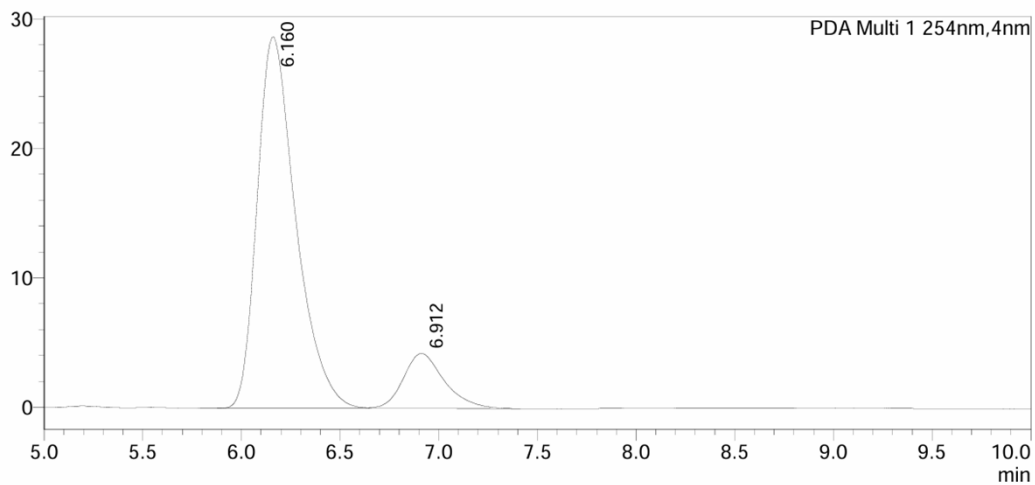

**<Peak Table>**

PDA Ch1 254nm

| Peak# | Ret. Time | Area   | Height | Area%   |
|-------|-----------|--------|--------|---------|
| 1     | 6.160     | 391362 | 28686  | 86.403  |
| 2     | 6.912     | 61588  | 4250   | 13.597  |
| Total |           | 452950 | 32935  | 100.000 |



3n: IF-3, Hex/iPrOH=95/5, rate=0.800 mL/min, 254 nm

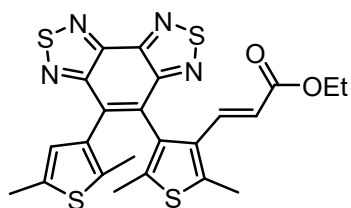

<Chromatogram>

mAU

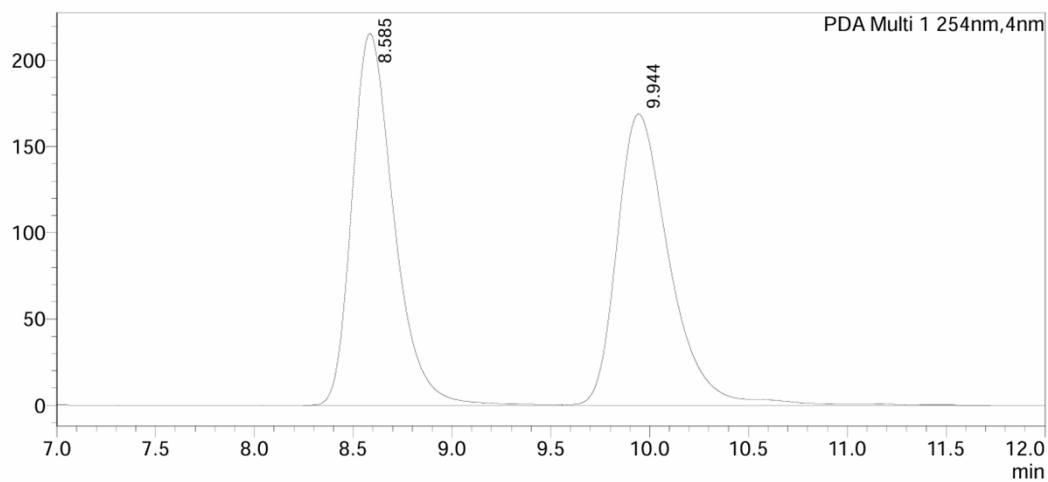

<Peak Table>

PDA Ch1 254nm

| Peak# | Ret. Time | Area    | Height | Area%   |
|-------|-----------|---------|--------|---------|
| 1     | 8.585     | 3173117 | 215558 | 50.375  |
| 2     | 9.944     | 3125860 | 168859 | 49.625  |
| Total |           | 6298977 | 384417 | 100.000 |

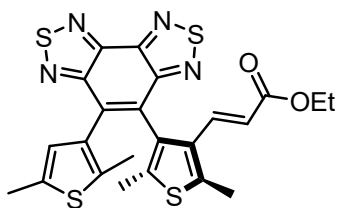

<Chromatogram>

mAU

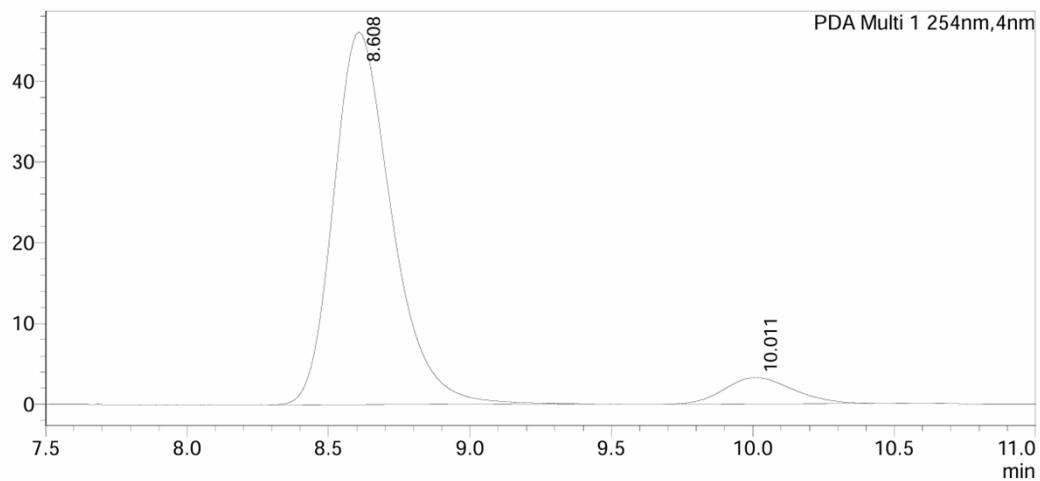

<Peak Table>

PDA Ch1 254nm

| Peak# | Ret. Time | Area   | Height | Area%   |
|-------|-----------|--------|--------|---------|
| 1     | 8.608     | 658876 | 46122  | 92.278  |
| 2     | 10.011    | 55140  | 3250   | 7.722   |
| Total |           | 714016 | 49372  | 100.000 |

3o: IF-3, Hex/iPrOH=95/5, rate=0.800 mL/min, 254 nm

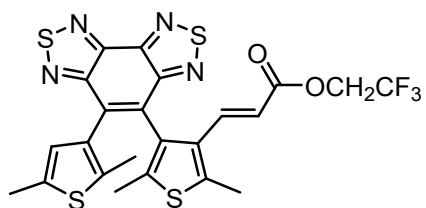

<Chromatogram>

mAU

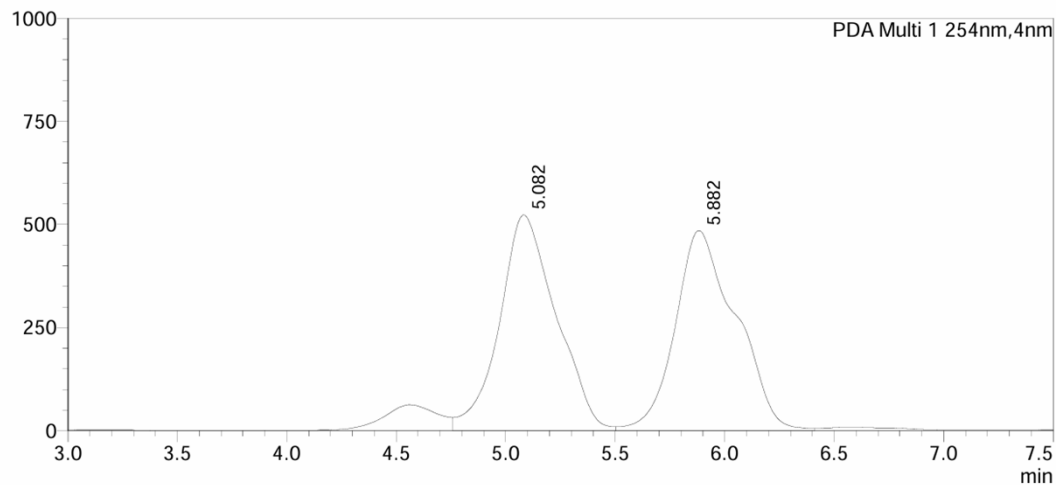

<Peak Table>

PDA Ch1 254nm

| Peak# | Ret. Time | Area     | Height  | Area%   |
|-------|-----------|----------|---------|---------|
| 1     | 5.082     | 9416262  | 522636  | 50.065  |
| 2     | 5.882     | 9391960  | 484726  | 49.935  |
| Total |           | 18808222 | 1007362 | 100.000 |

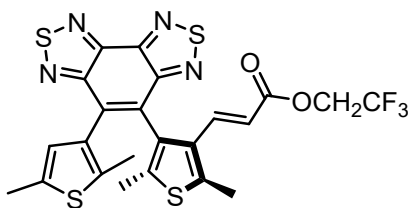

**<Chromatogram>**

mAU

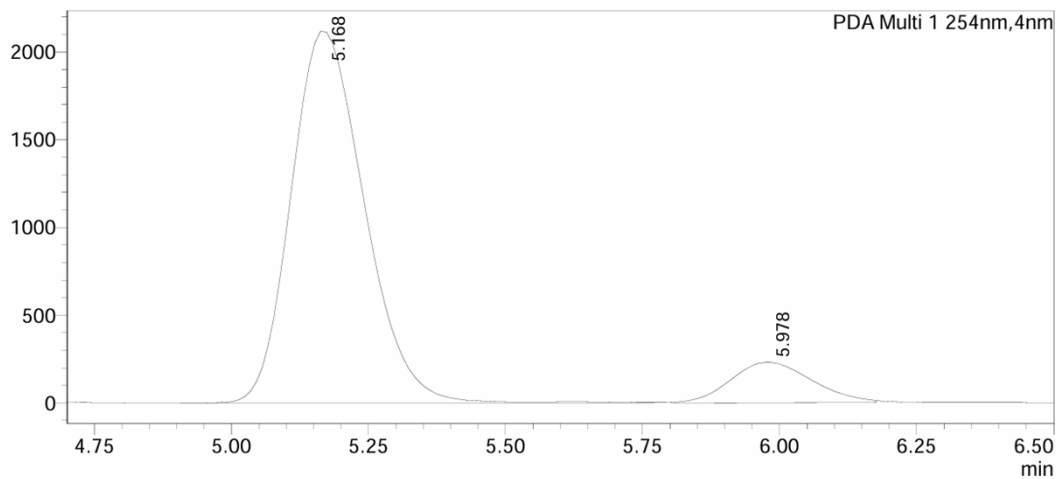

**<Peak Table>**

PDA Ch1 254nm

| Peak# | Ret. Time | Area     | Height  | Area%   |
|-------|-----------|----------|---------|---------|
| 1     | 5.168     | 19726911 | 2117271 | 89.236  |
| 2     | 5.978     | 2379564  | 229971  | 10.764  |
| Total |           | 22106475 | 2347243 | 100.000 |

3p: A05, Hex/iPrOH=90/10, rate=1.000 mL/min, 254 nm

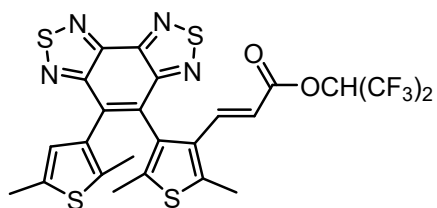

<Chromatogram>

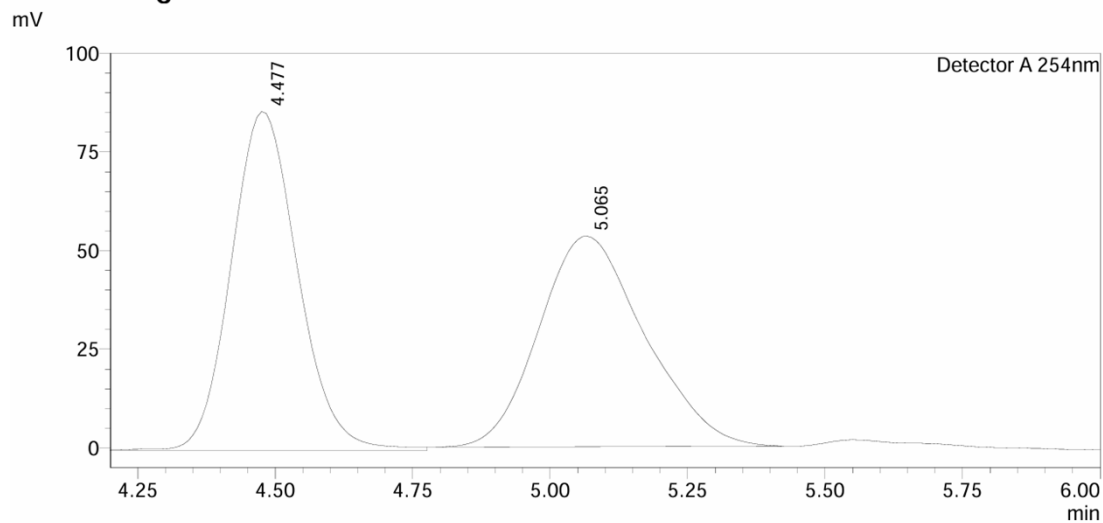

<Peak Table>

| Peak# | Ret. Time | Area    | Height | Conc.  |
|-------|-----------|---------|--------|--------|
| 1     | 4.477     | 727020  | 86022  | 50.477 |
| 2     | 5.065     | 713292  | 53411  | 49.523 |
| Total |           | 1440312 | 139434 |        |

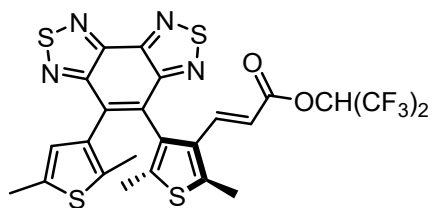

<Chromatogram>

mV

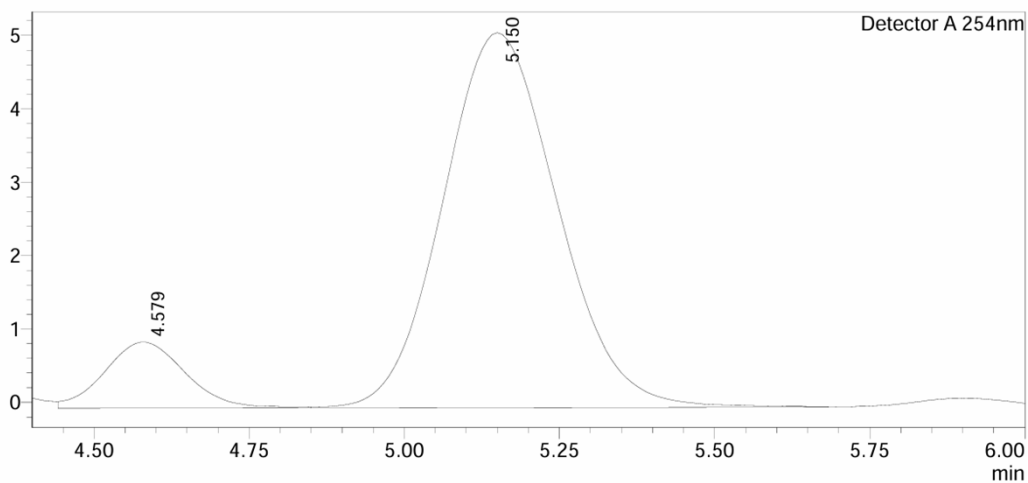

<Peak Table>

Detector A 254nm

| Peak# | Ret. Time | Area  | Height | Conc.  |
|-------|-----------|-------|--------|--------|
| 1     | 4.579     | 8120  | 897    | 11.030 |
| 2     | 5.150     | 65499 | 5110   | 88.970 |
| Total |           | 73618 | 6007   |        |

3q: IF-3, Hex/iPrOH=95/5, rate=1.000 mL/min, 254 nm

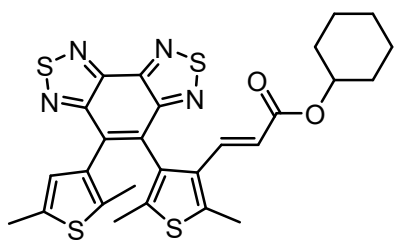

<Chromatogram>

mAU

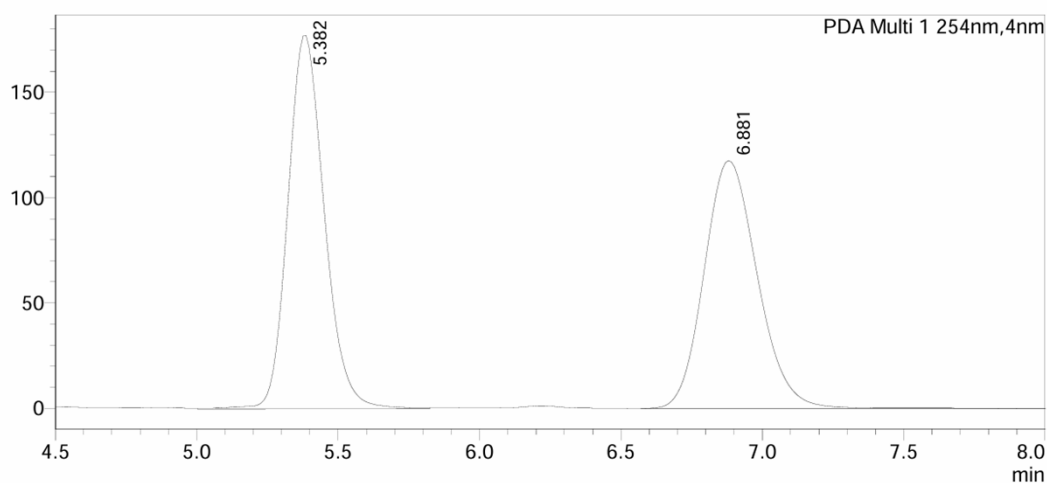

<Peak Table>

PDA Ch1 254nm

| Peak# | Ret. Time | Area    | Height | Area%   |
|-------|-----------|---------|--------|---------|
| 1     | 5.382     | 1599725 | 177074 | 50.646  |
| 2     | 6.881     | 1558918 | 117834 | 49.354  |
| Total |           | 3158643 | 294908 | 100.000 |

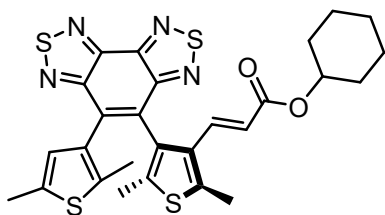

**<Chromatogram>**

mAU

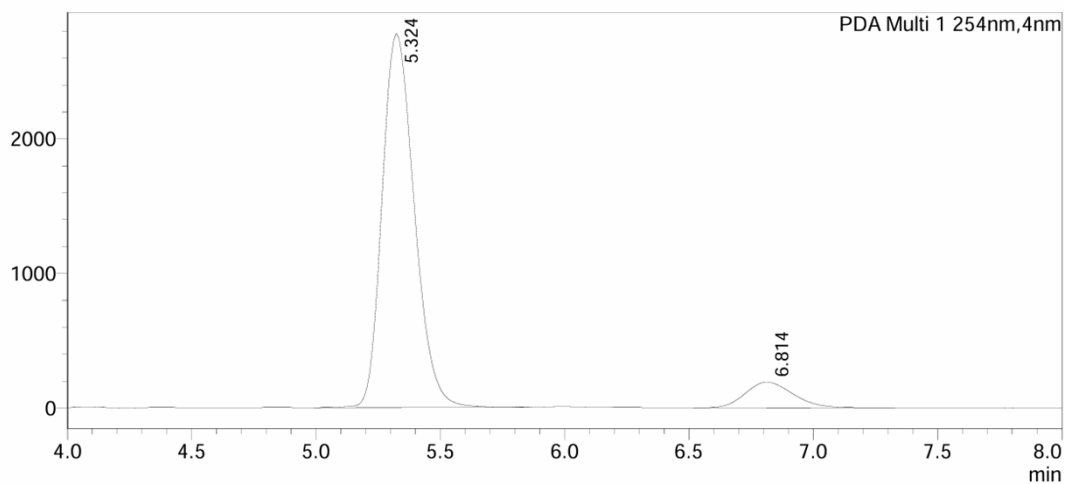

**<Peak Table>**

PDA Ch1 254nm

| Peak# | Ret. Time | Area     | Height  | Area%   |
|-------|-----------|----------|---------|---------|
| 1     | 5.324     | 25068256 | 2781412 | 90.745  |
| 2     | 6.814     | 2556702  | 191480  | 9.255   |
| Total |           | 27624958 | 2972892 | 100.000 |



3r: IF-3, Hex/iPrOH=85/15, rate=1.000 mL/min, 254 nm

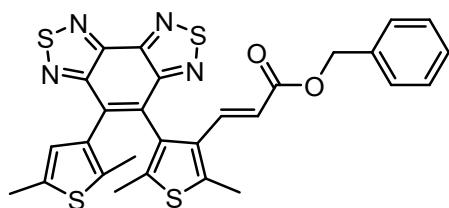

<Chromatogram>

mV

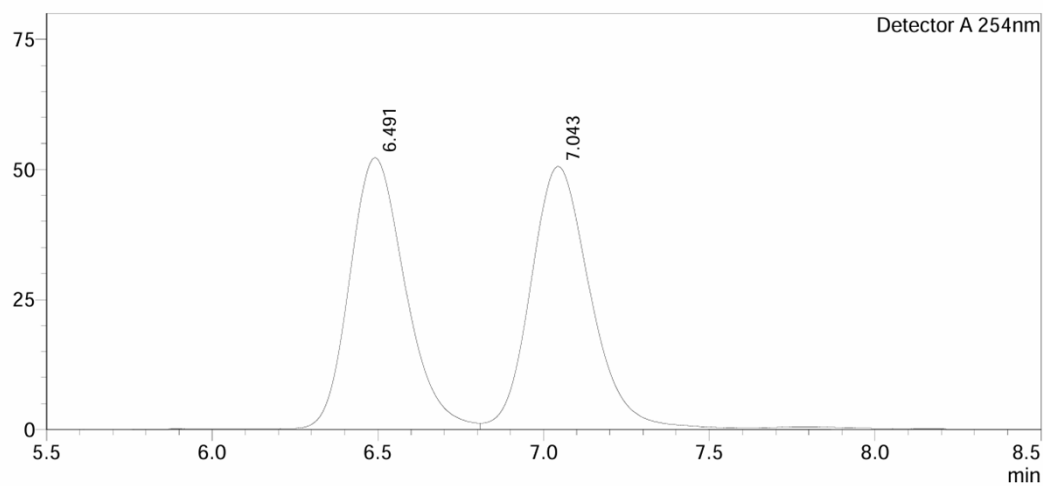

<Peak Table>

Detector A 254nm

| Peak# | Ret. Time | Area    | Height | Conc.  |
|-------|-----------|---------|--------|--------|
| 1     | 6.491     | 616870  | 52307  | 48.783 |
| 2     | 7.043     | 647651  | 50635  | 51.217 |
| Total |           | 1264521 | 102941 |        |

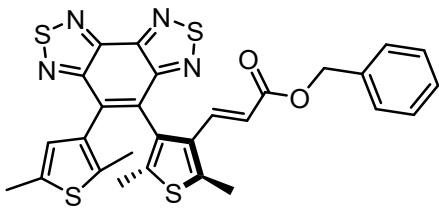

**<Chromatogram>**

mV

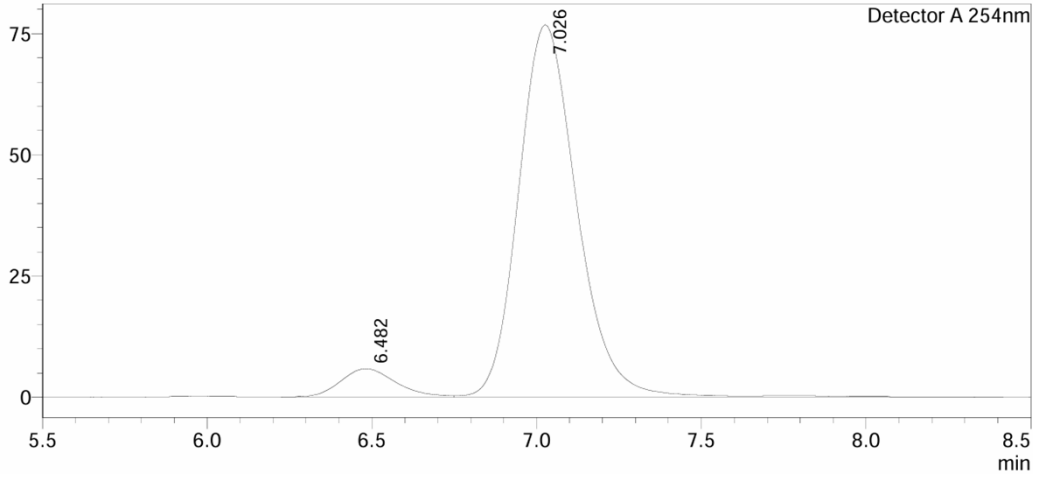

**<Peak Table>**

Detector A 254nm

| Peak# | Ret. Time | Area    | Height | Conc.  |
|-------|-----------|---------|--------|--------|
| 1     | 6.482     | 67856   | 5816   | 6.675  |
| 2     | 7.026     | 948759  | 76765  | 93.325 |
| Total |           | 1016615 | 82581  |        |

3s: IF-3, Hex/iPrOH=90/10, rate=1.000 mL/min, 254 nm

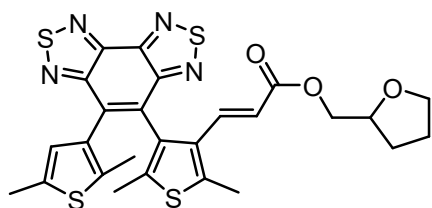

<Chromatogram>

mV

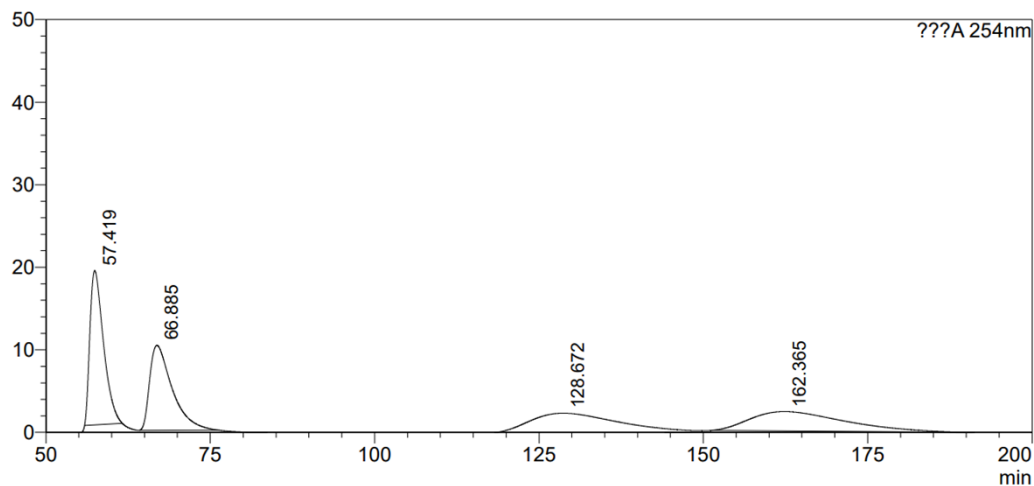

<Peak Table>

???A 254nm

| Peak# | Ret. Time | Area    | Area%   |
|-------|-----------|---------|---------|
| 1     | 57.419    | 2699254 | 27.439  |
| 2     | 66.885    | 2452058 | 24.926  |
| 3     | 128.672   | 2301817 | 23.399  |
| 4     | 162.365   | 2384219 | 24.236  |
| Total |           | 9837348 | 100.000 |

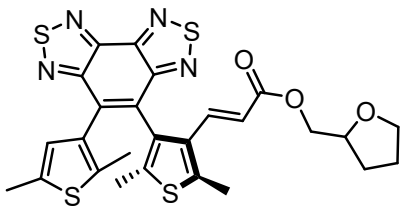

**<Chromatogram>**

mV

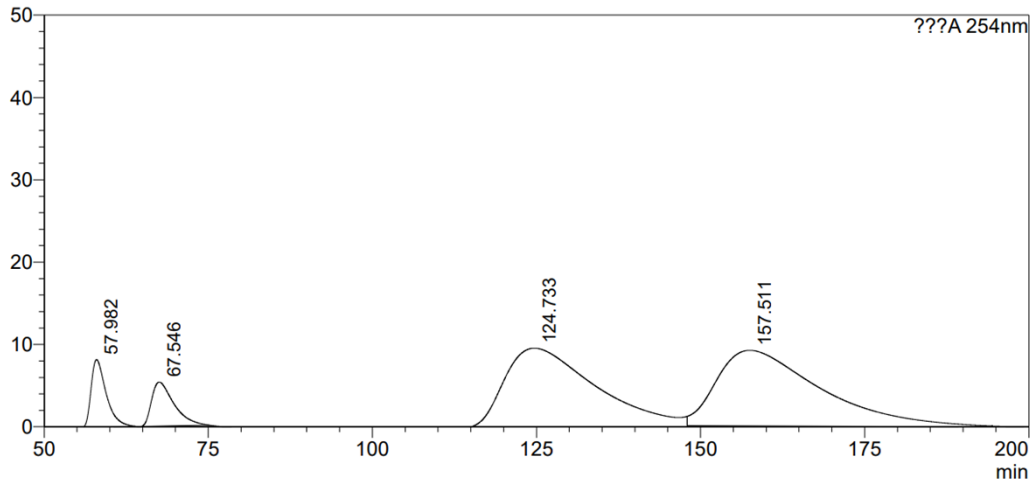

**<Peak Table>**

???A 254nm

| Peak# | Ret. Time | Area     | Area%   |
|-------|-----------|----------|---------|
| 1     | 57.982    | 1310597  | 5.908   |
| 2     | 67.546    | 1254565  | 5.656   |
| 3     | 124.733   | 9473540  | 42.709  |
| 4     | 157.511   | 10143043 | 45.727  |
| Total |           | 22181745 | 100.000 |

3t: AD-H, Hex/iPrOH=92/8, rate=0.800 mL/min, 254 nm

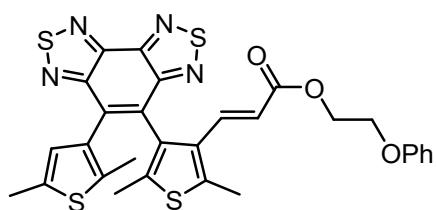

### <Chromatogram>

mAU

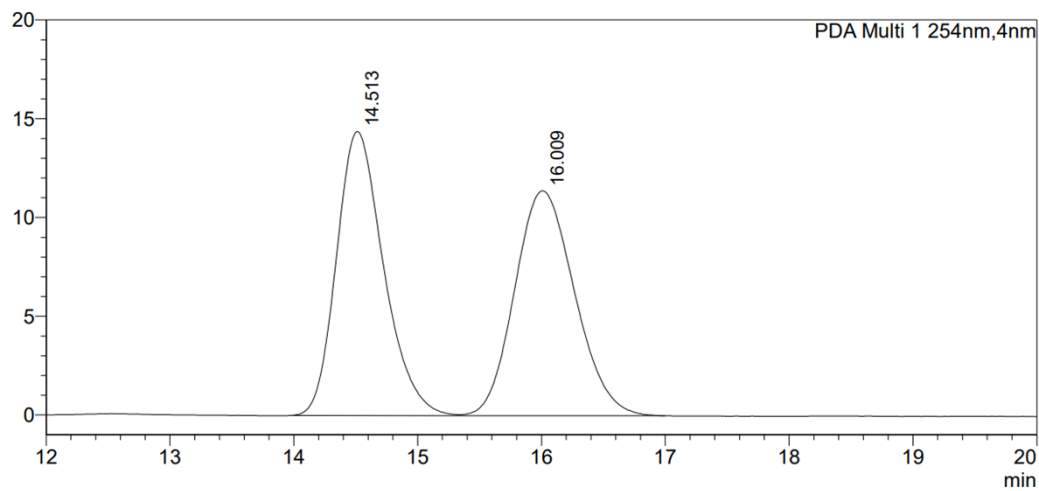

### <Peak Table>

PDA Ch1 254nm

| Peak# | Ret. Time | Area   | Height | Area%   |
|-------|-----------|--------|--------|---------|
| 1     | 14.513    | 381520 | 14384  | 49.895  |
| 2     | 16.009    | 383120 | 11391  | 50.105  |
| Total |           | 764640 | 25775  | 100.000 |

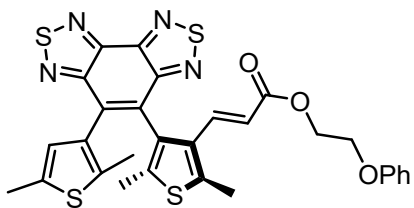

**<Chromatogram>**

mAU

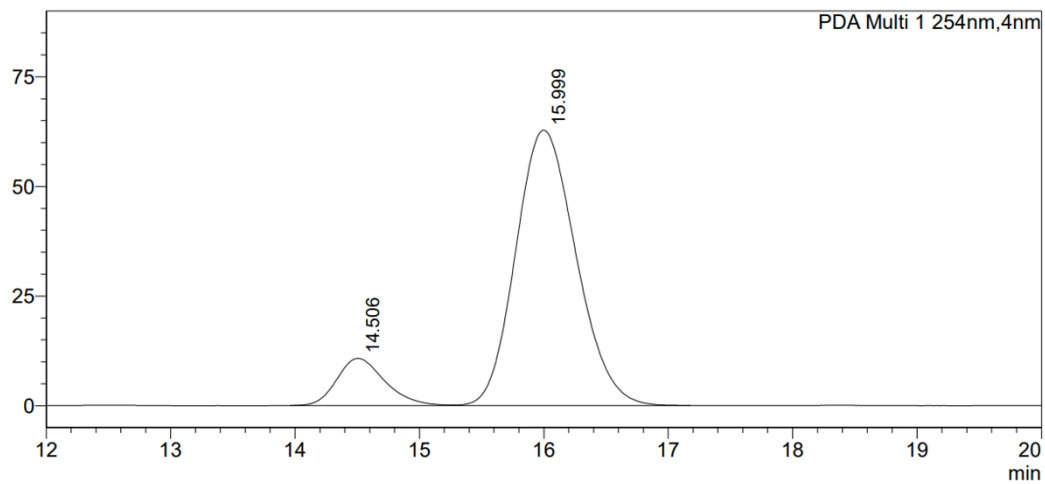

**<Peak Table>**

PDA Ch1 254nm

| Peak# | Ret. Time | Area    | Height | Area%   |
|-------|-----------|---------|--------|---------|
| 1     | 14.506    | 286512  | 10755  | 11.912  |
| 2     | 15.999    | 2118684 | 62813  | 88.088  |
| Total |           | 2405196 | 73568  | 100.000 |

3u: AD-H, Hex/iPrOH=90/10, rate=1.000 mL/min, 254 nm

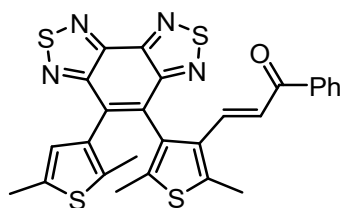

<Chromatogram>

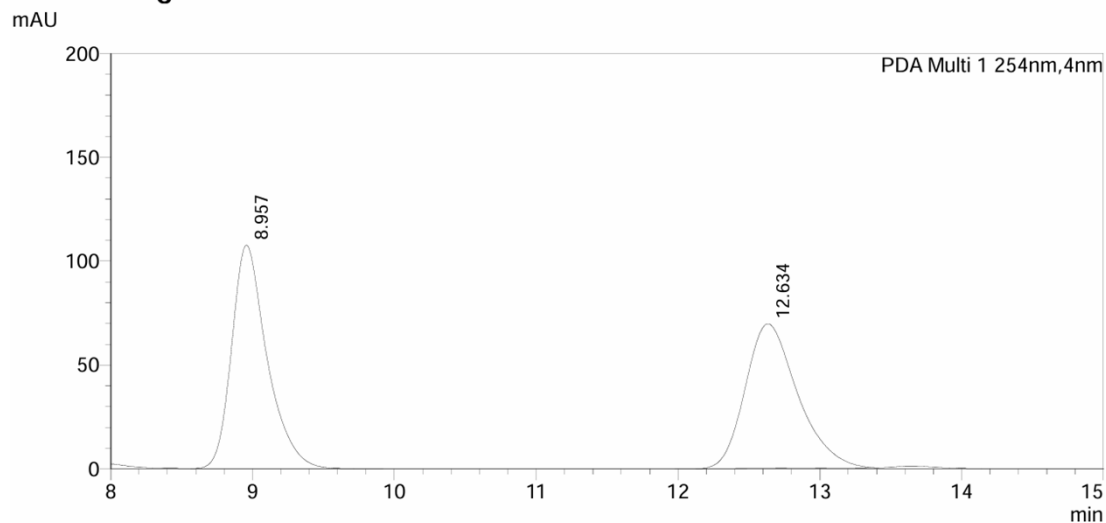

<Peak Table>

PDA Ch1 254nm

| Peak# | Ret. Time | Area    | Height | Area%   |
|-------|-----------|---------|--------|---------|
| 1     | 8.957     | 1871689 | 107720 | 51.179  |
| 2     | 12.634    | 1785451 | 69618  | 48.821  |
| Total |           | 3657139 | 177338 | 100.000 |

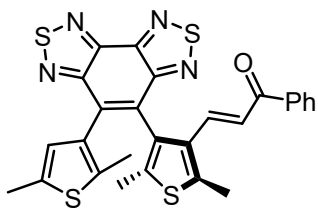

**<Chromatogram>**

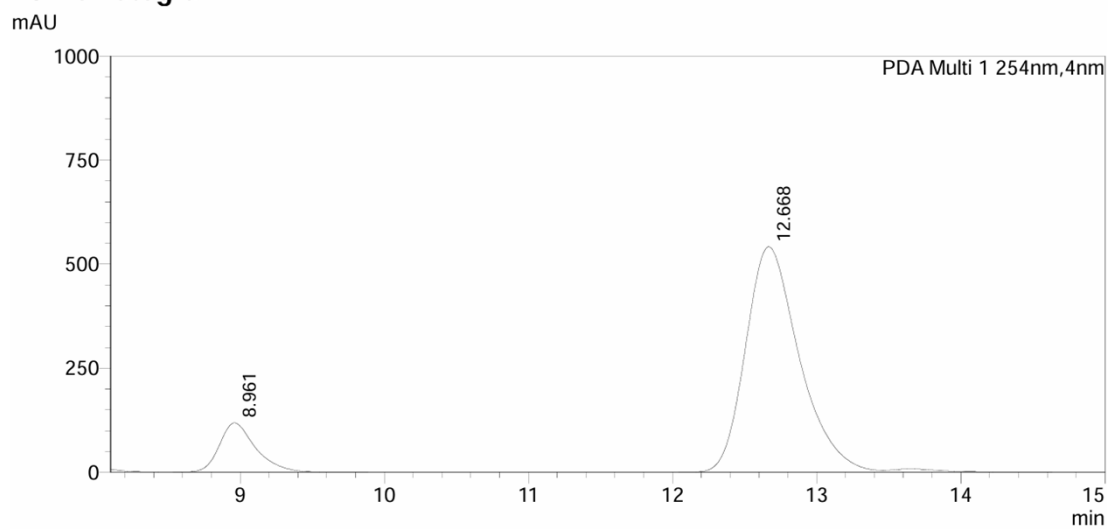

**<Peak Table>**

PDA Ch1 254nm

| Peak# | Ret. Time | Area     | Height | Area%   |
|-------|-----------|----------|--------|---------|
| 1     | 8.961     | 2085737  | 118719 | 12.783  |
| 2     | 12.668    | 14230756 | 541831 | 87.217  |
| Total |           | 16316493 | 660550 | 100.000 |



3v: IF-3, Hex/iPrOH=85/15, rate=1.000 mL/min, 254 nm

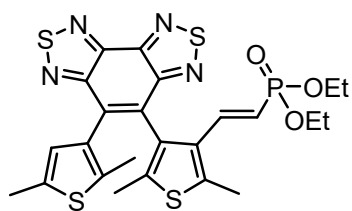

<Chromatogram>

mV

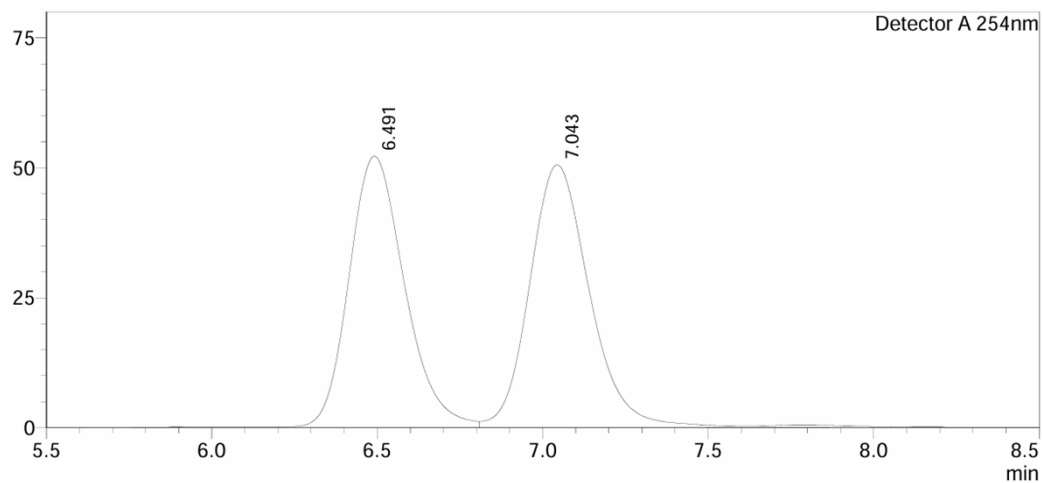

<Peak Table>

Detector A 254nm

| Peak# | Ret. Time | Area    | Height | Conc.  |
|-------|-----------|---------|--------|--------|
| 1     | 6.491     | 616870  | 52307  | 48.783 |
| 2     | 7.043     | 647651  | 50635  | 51.217 |
| Total |           | 1264521 | 102941 |        |

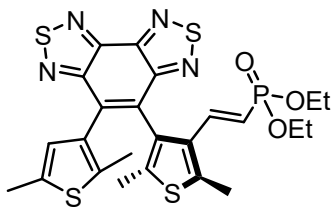

**<Chromatogram>**

mV

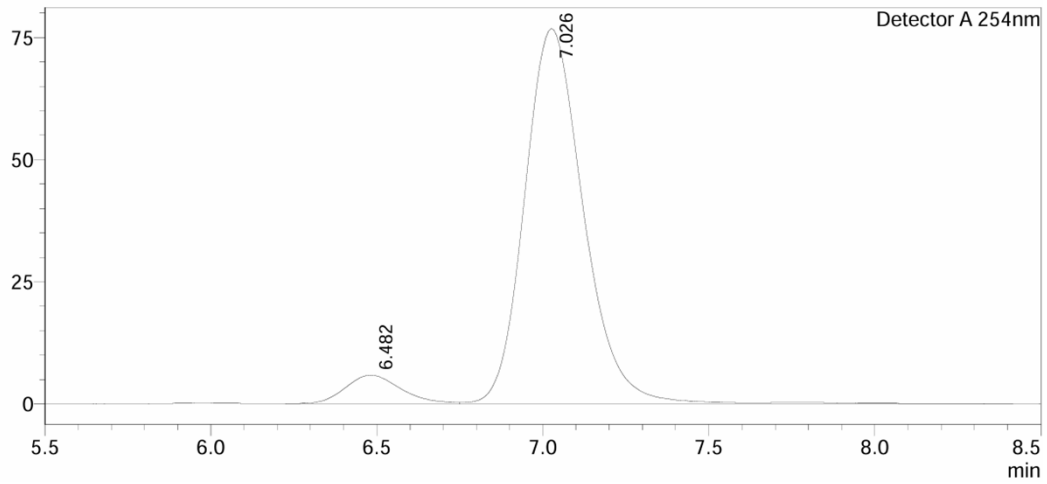

**<Peak Table>**

Detector A 254nm

| Peak# | Ret. Time | Area    | Height | Conc.  |
|-------|-----------|---------|--------|--------|
| 1     | 6.482     | 67856   | 5816   | 6.675  |
| 2     | 7.026     | 948759  | 76765  | 93.325 |
| Total |           | 1016615 | 82581  |        |

3w: IF-3, Hex/iPrOH=85/15, rate=1.000 mL/min, 254 nm

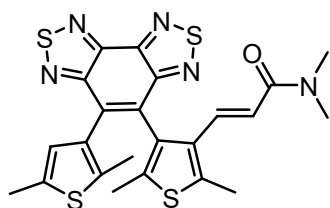

<Chromatogram>

mAU

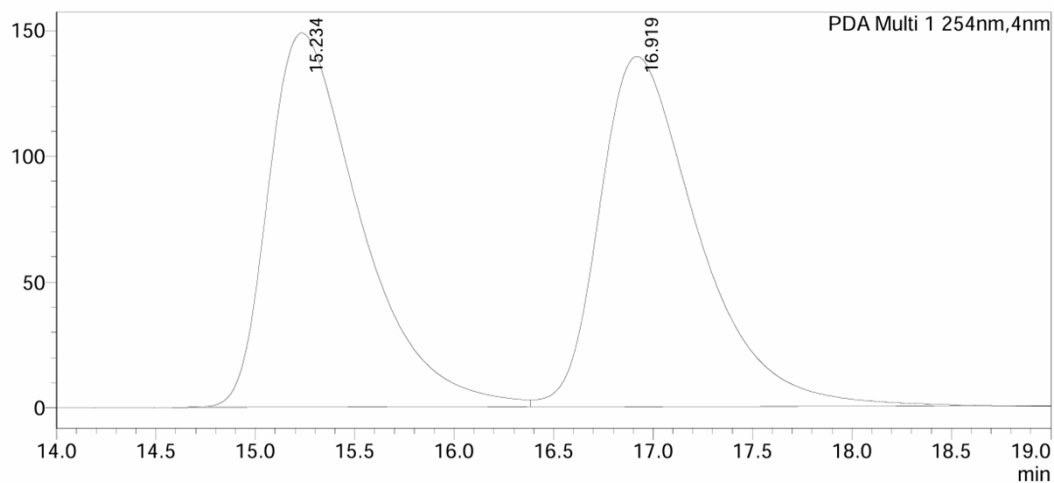

<Peak Table>

PDA Ch1 254nm

| Peak# | Ret. Time | Area    | Height | Area%   |
|-------|-----------|---------|--------|---------|
| 1     | 15.234    | 4820787 | 148818 | 49.977  |
| 2     | 16.919    | 4825173 | 139277 | 50.023  |
| Total |           | 9645960 | 288095 | 100.000 |

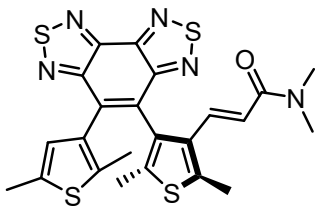

<Chromatogram>

mAU

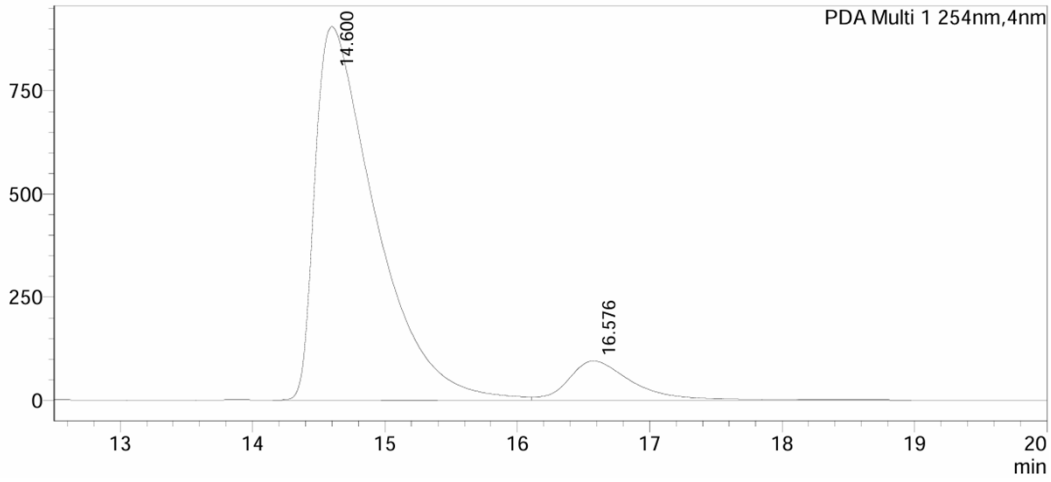

<Peak Table>

PDA Ch1 254nm

| Peak# | Ret. Time | Area     | Height  | Area%   |
|-------|-----------|----------|---------|---------|
| 1     | 14.600    | 28791490 | 905695  | 90.143  |
| 2     | 16.576    | 3148281  | 94787   | 9.857   |
| Total |           | 31939771 | 1000482 | 100.000 |

3x: IF-3, Hex/iPrOH=97/3, rate=1.000 mL/min, 254 nm

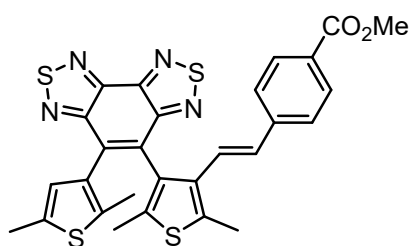

### <Chromatogram>

mV

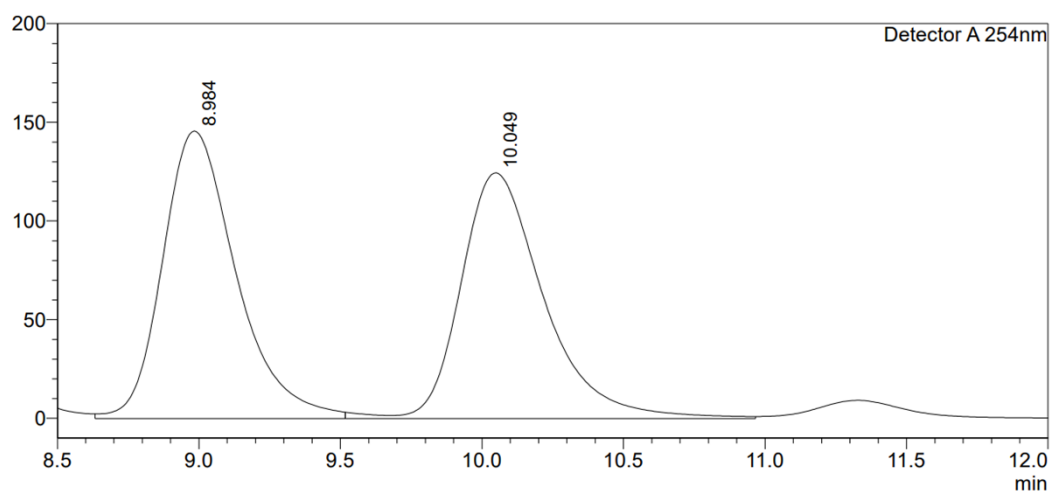

### <Peak Table>

Detector A 254nm

| Peak# | Ret. Time | Area    | Height | Area%   |
|-------|-----------|---------|--------|---------|
| 1     | 8.984     | 2635881 | 145705 | 50.839  |
| 2     | 10.049    | 2548876 | 124480 | 49.161  |
| Total |           | 5184757 | 270185 | 100.000 |

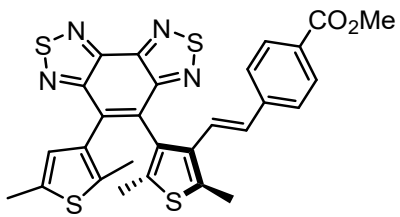

**<Chromatogram>**

mV

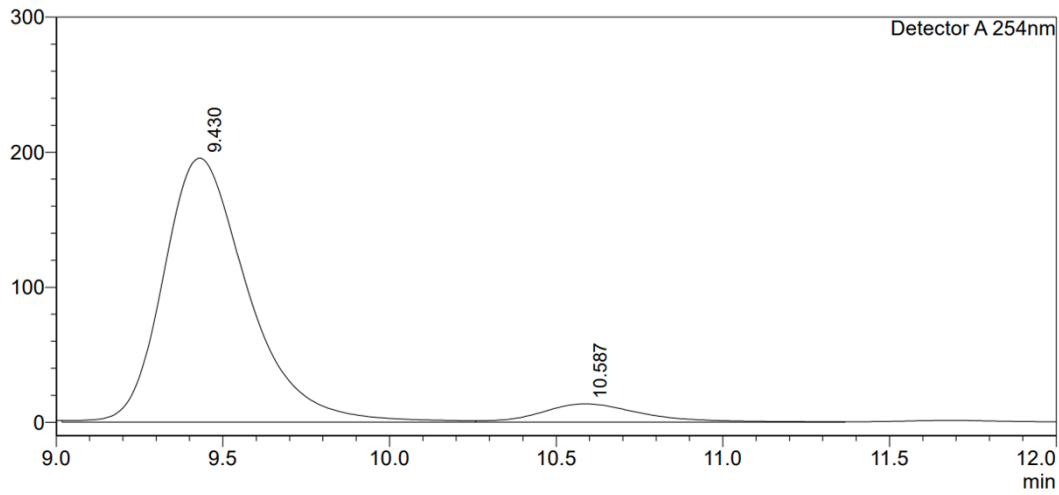

**<Peak Table>**

Detector A 254nm

| Peak# | Ret. Time | Area    | Height | Area%   |
|-------|-----------|---------|--------|---------|
| 1     | 9.430     | 3464387 | 195543 | 92.340  |
| 2     | 10.587    | 287368  | 13600  | 7.660   |
| Total |           | 3751755 | 209143 | 100.000 |

3y: IF-3, Hex/iPrOH=92/8, rate=0.800 mL/min, 254 nm

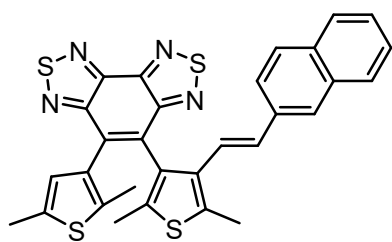

<Chromatogram>

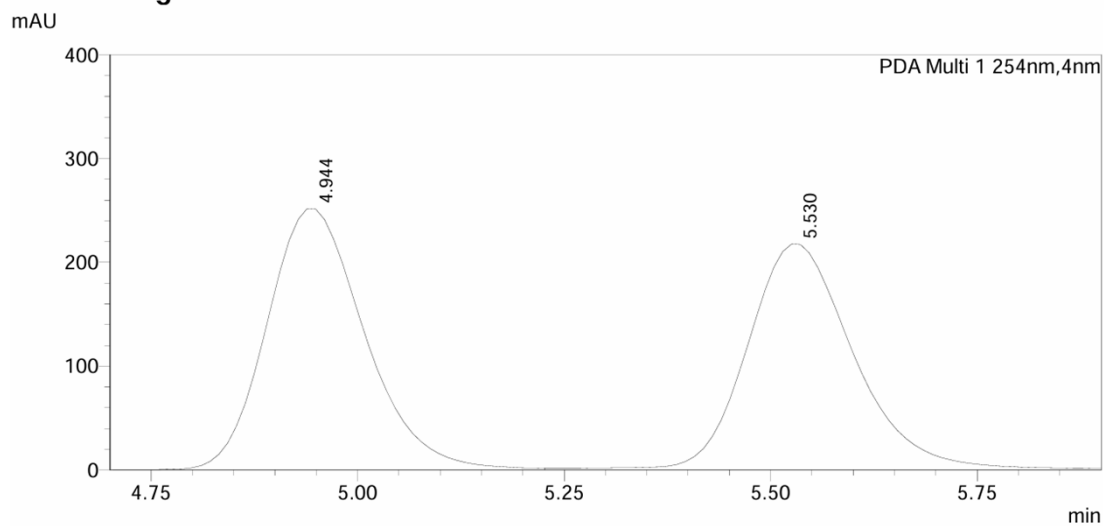

<Peak Table>

PDA Ch1 254nm

| Peak# | Ret. Time | Area    | Height | Area%   |
|-------|-----------|---------|--------|---------|
| 1     | 4.944     | 2069641 | 251635 | 50.984  |
| 2     | 5.530     | 1989759 | 217989 | 49.016  |
| Total |           | 4059399 | 469624 | 100.000 |

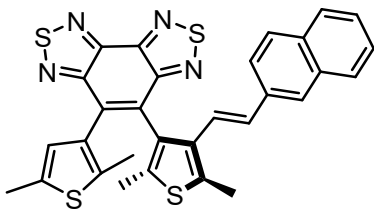

**<Chromatogram>**

mAU

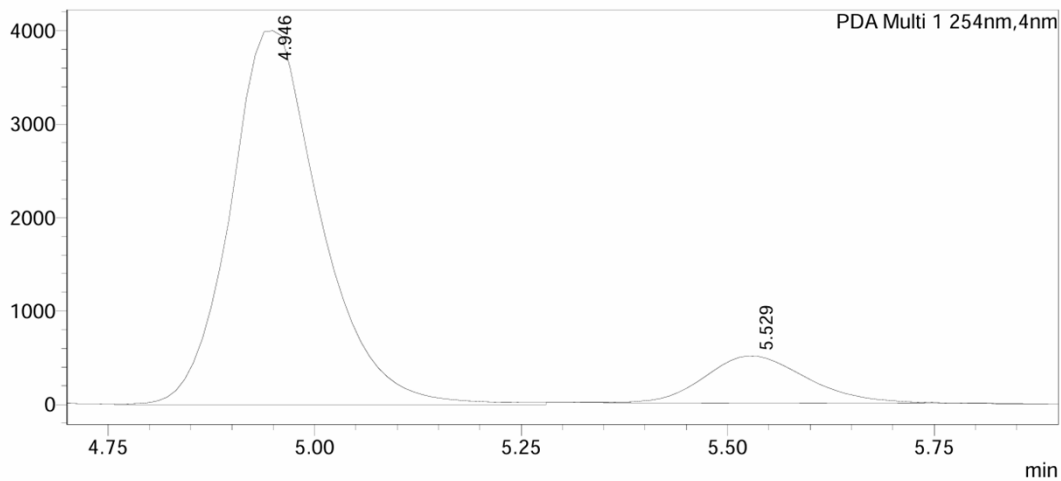

**<Peak Table>**

PDA Ch1 254nm

| Peak# | Ret. Time | Area     | Height  | Area%   |
|-------|-----------|----------|---------|---------|
| 1     | 4.946     | 30380998 | 3999526 | 87.317  |
| 2     | 5.529     | 4412749  | 505687  | 12.683  |
| Total |           | 34793746 | 4505213 | 100.000 |



3z-mono: IF-3, Hex/iPrOH=95/5, rate=1.000 mL/min, 254 nm

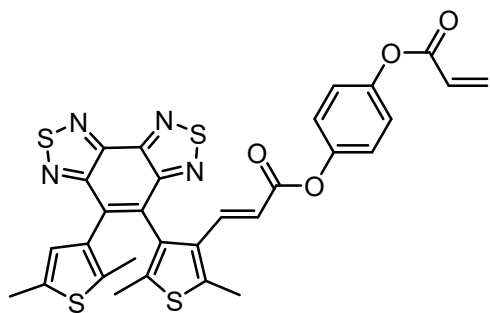

### <Chromatogram>

mAU

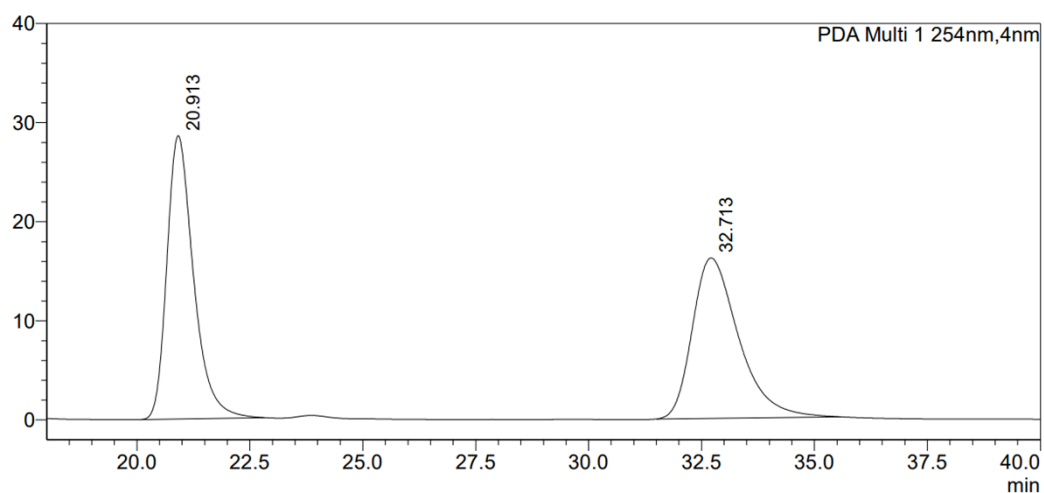

### <Peak Table>

PDA Ch1 254nm

| Peak# | Ret. Time | Area    | Height | Area%   |
|-------|-----------|---------|--------|---------|
| 1     | 20.913    | 1174465 | 28590  | 50.435  |
| 2     | 32.713    | 1154195 | 16187  | 49.565  |
| Total |           | 2328660 | 44777  | 100.000 |

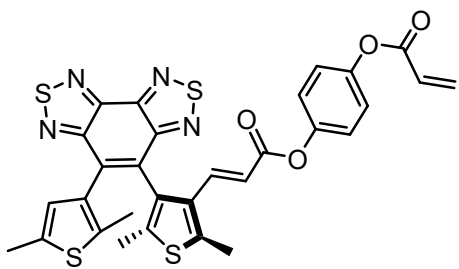

**<Chromatogram>**

mAU

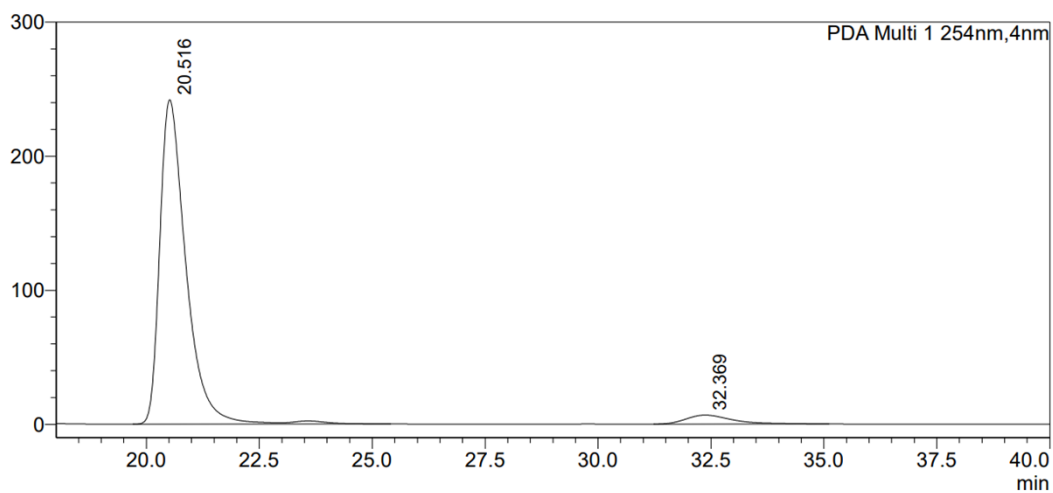

**<Peak Table>**

PDA Ch1 254nm

| Peak# | Ret. Time | Area     | Height | Area%   |
|-------|-----------|----------|--------|---------|
| 1     | 20.516    | 9832123  | 241994 | 95.348  |
| 2     | 32.369    | 479652   | 6699   | 4.652   |
| Total |           | 10311775 | 248692 | 100.000 |

3z-di: IF-3, Hex/iPrOH=85/15, rate=1.000 mL/min, 254 nm

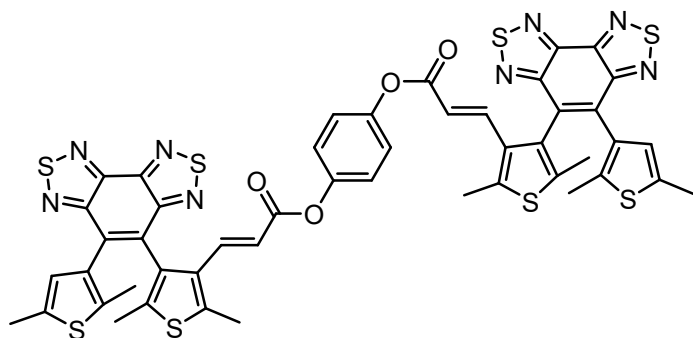

### <Chromatogram>

mAU

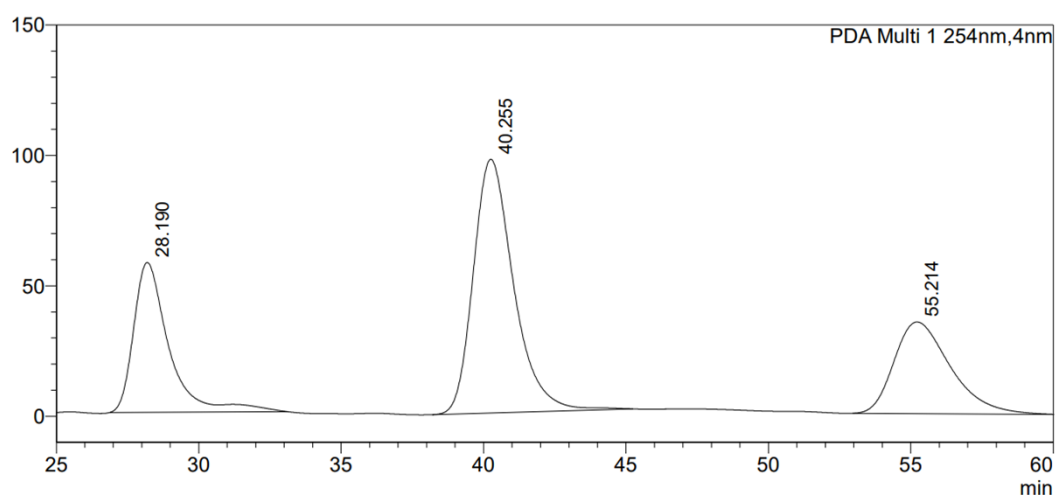

### <Peak Table>

PDA Ch1 254nm

| Peak# | Ret. Time | Area     | Height | Area%   |
|-------|-----------|----------|--------|---------|
| 1     | 28.190    | 4965637  | 57419  | 25.614  |
| 2     | 40.255    | 9589051  | 97267  | 49.463  |
| 3     | 55.214    | 4831500  | 35142  | 24.922  |
| Total |           | 19386188 | 189829 | 100.000 |

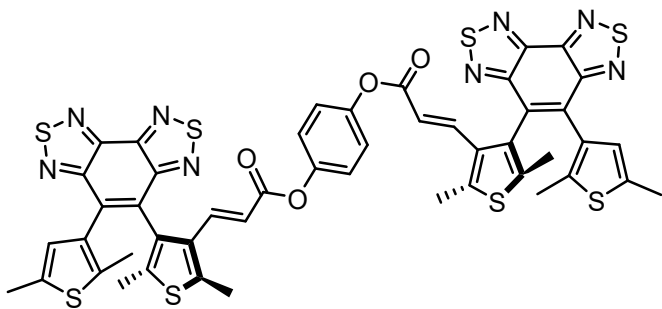

**<Chromatogram>**

mAU

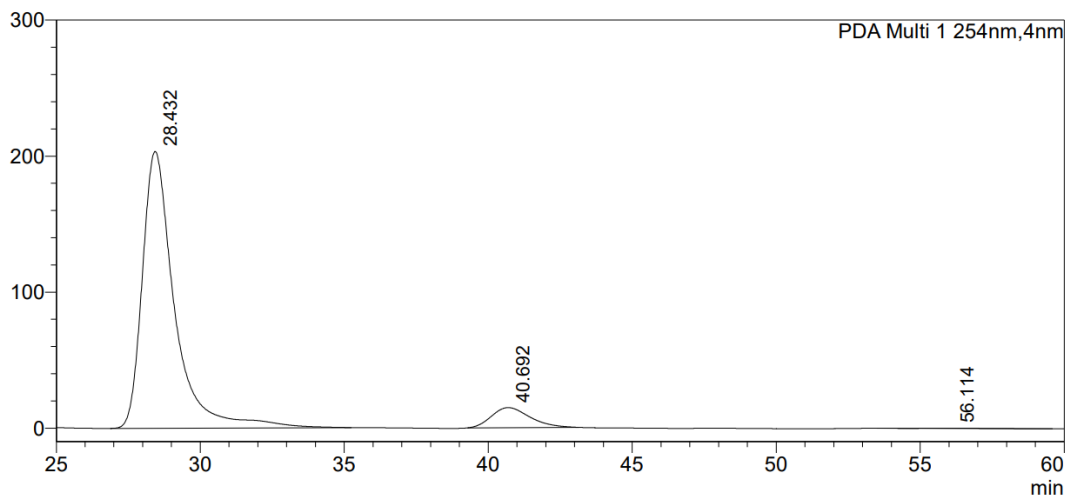

**<Peak Table>**

PDA Ch1 254nm

| Peak# | Ret. Time | Area     | Height | Area%   |
|-------|-----------|----------|--------|---------|
| 1     | 28.432    | 15909407 | 203527 | 91.975  |
| 2     | 40.692    | 1366446  | 14770  | 7.900   |
| 3     | 56.114    | 21690    | 244    | 0.125   |
| Total |           | 17297544 | 218541 | 100.000 |

3aa: IF-3, Hex/iPrOH=90/10, rate=1.000 mL/min, 254 nm

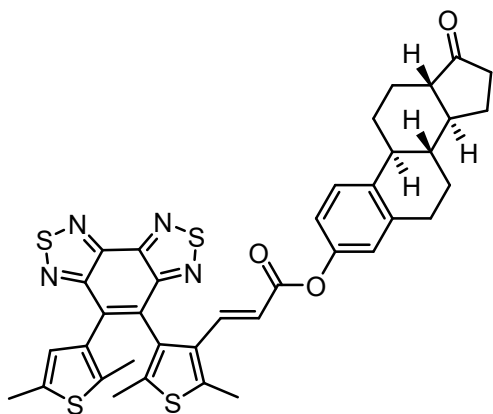

<Chromatogram>

mV

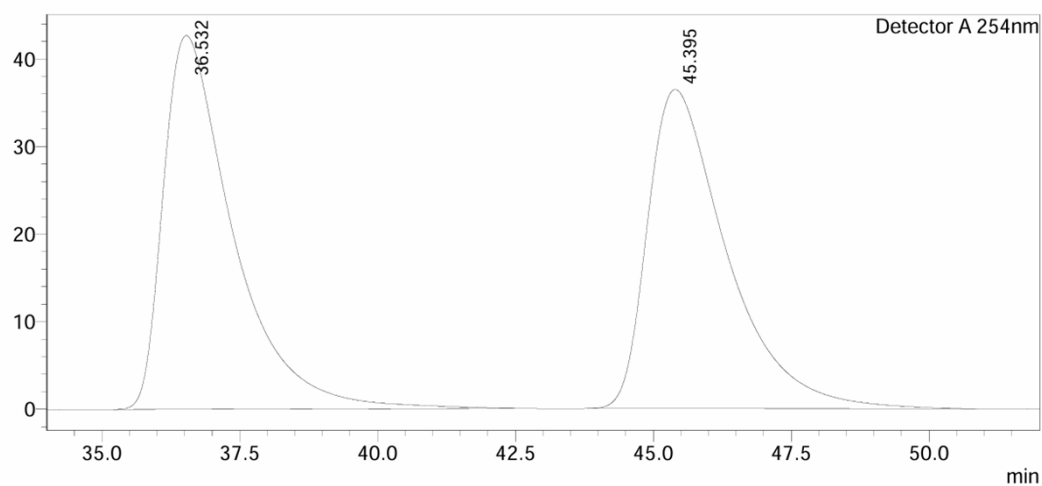

<Peak Table>

Detector A 254nm

| Peak# | Ret. Time | Area    | Height | Conc.  |
|-------|-----------|---------|--------|--------|
| 1     | 36.532    | 3758110 | 42666  | 50.719 |
| 2     | 45.395    | 3651534 | 36429  | 49.281 |
| Total |           | 7409644 | 79096  |        |

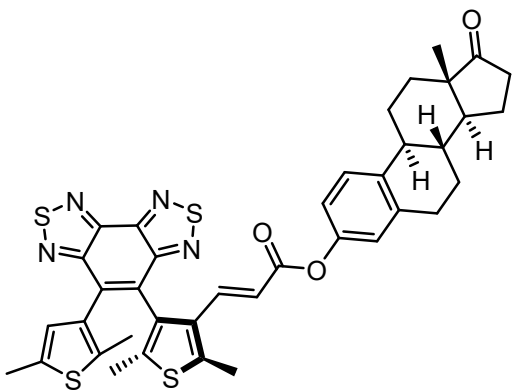

**<Chromatogram>**

mV

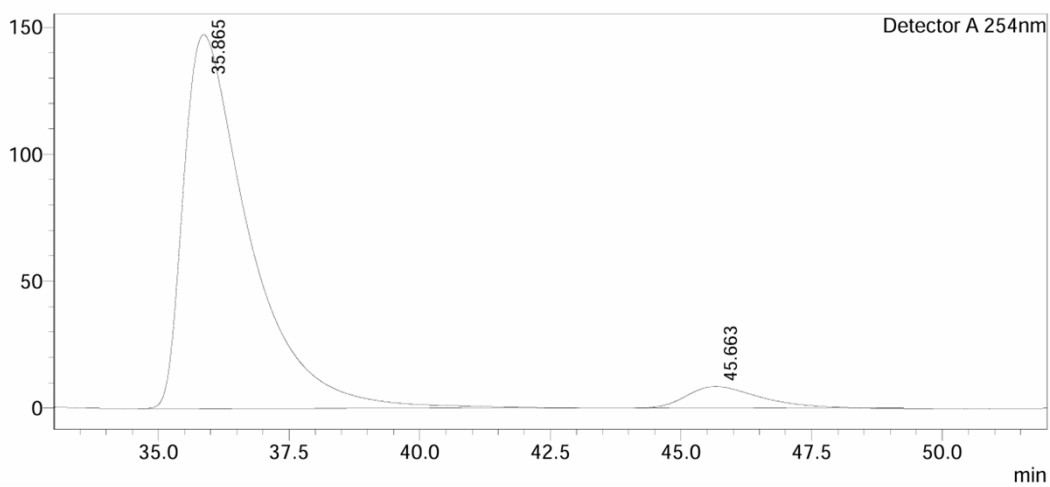

**<Peak Table>**

Detector A 254nm

| Peak# | Ret. Time | Area     | Height | Conc.  |
|-------|-----------|----------|--------|--------|
| 1     | 35.865    | 12854753 | 147142 | 93.838 |
| 2     | 45.663    | 844138   | 8468   | 6.162  |
| Total |           | 13698891 | 155610 |        |

3ab: IF-3, Hex/iPrOH=97/3, rate=1.000 mL/min, 254 nm

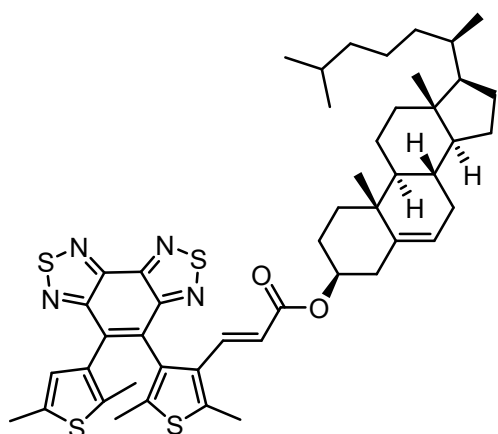

<Chromatogram>

mAU

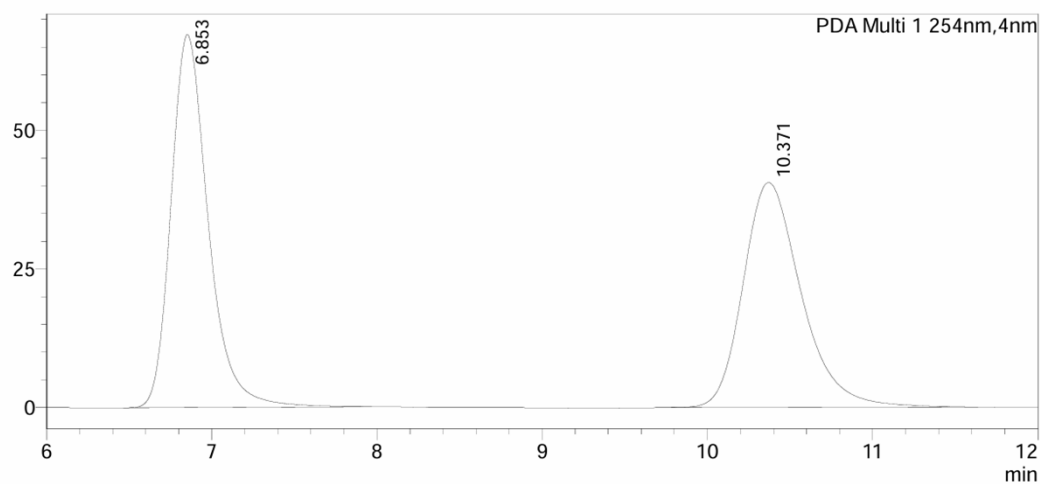

<Peak Table>

PDA Ch1 254nm

| Peak# | Ret. Time | Area    | Height | Area%   |
|-------|-----------|---------|--------|---------|
| 1     | 6.853     | 1054702 | 67219  | 51.511  |
| 2     | 10.371    | 992813  | 40581  | 48.489  |
| Total |           | 2047515 | 107800 | 100.000 |

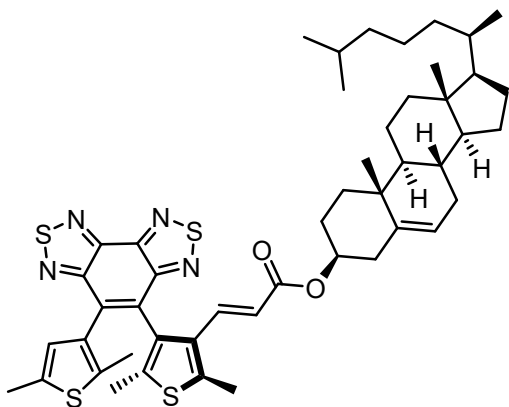

**<Chromatogram>**

mAU

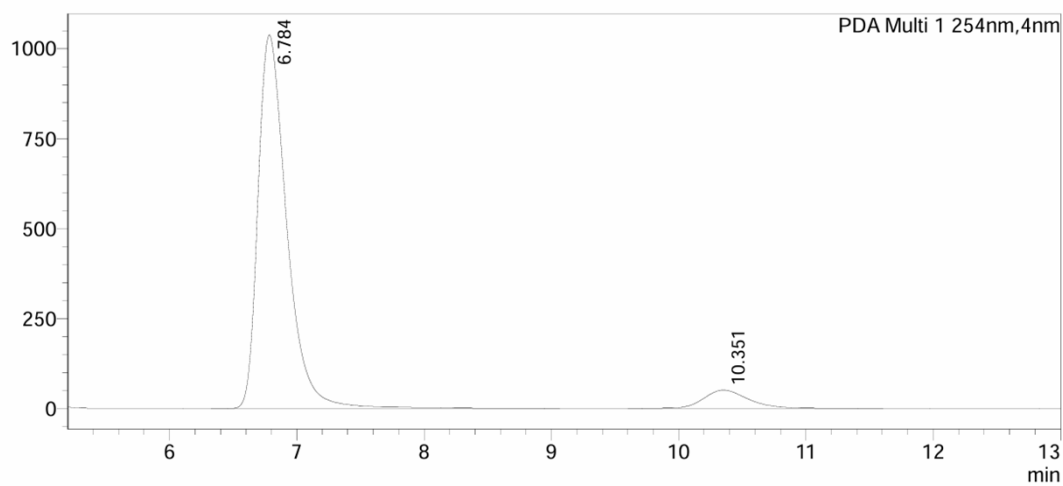

**<Peak Table>**

PDA Ch1 254nm

| Peak# | Ret. Time | Area     | Height  | Area%   |
|-------|-----------|----------|---------|---------|
| 1     | 6.784     | 16315771 | 1038674 | 92.858  |
| 2     | 10.351    | 1254819  | 50703   | 7.142   |
| Total |           | 17570590 | 1089378 | 100.000 |



4: IF-3, Hex/iPrOH=97/3, rate=1.000 mL/min, 254 nm

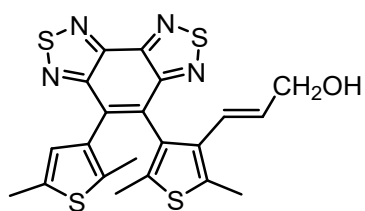

<Chromatogram>

mAU

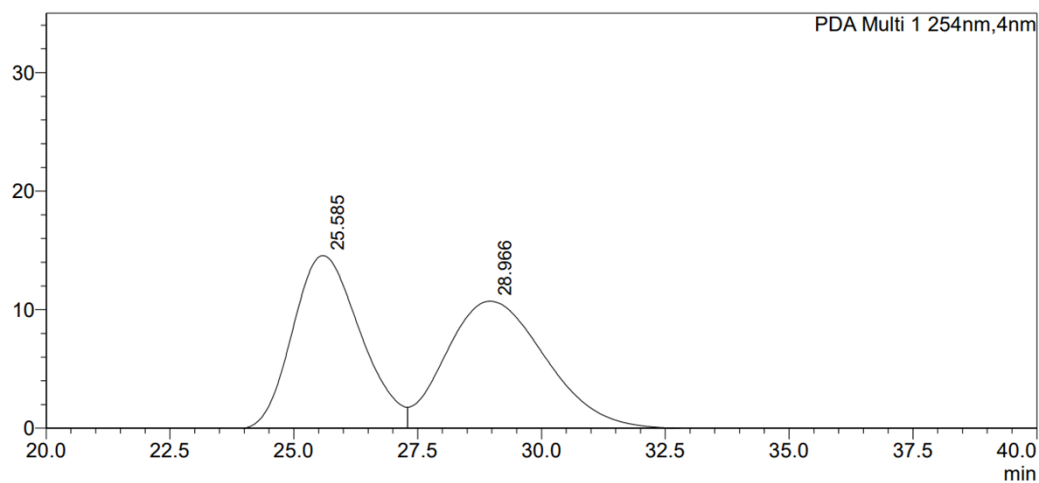

<Peak Table>

PDA Ch1 254nm

| Peak# | Ret. Time | Area    | Height | Area%   |
|-------|-----------|---------|--------|---------|
| 1     | 25.585    | 1395202 | 14612  | 48.161  |
| 2     | 28.966    | 1501754 | 10737  | 51.839  |
| Total |           | 2896957 | 25349  | 100.000 |

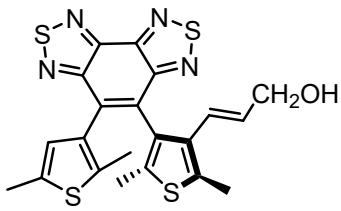

**<Chromatogram>**

mAU

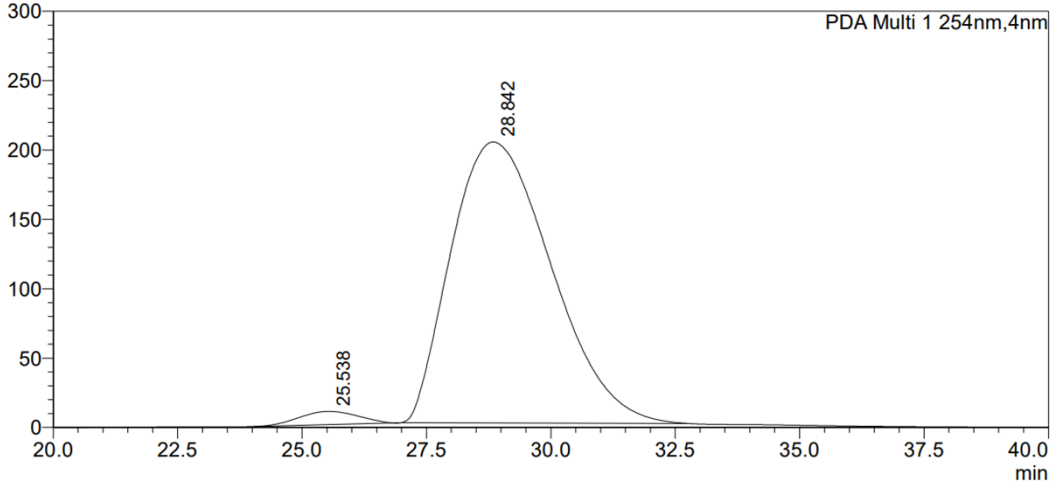

**<Peak Table>**

PDA Ch1 254nm

| Peak# | Ret. Time | Area     | Height | Area%   |
|-------|-----------|----------|--------|---------|
| 1     | 25.538    | 770953   | 9467   | 2.642   |
| 2     | 28.842    | 28404565 | 202483 | 97.358  |
| Total |           | 29175518 | 211951 | 100.000 |

5: IF-3, Hex/iPrOH=98/2, rate=0.400 mL/min, 254 nm

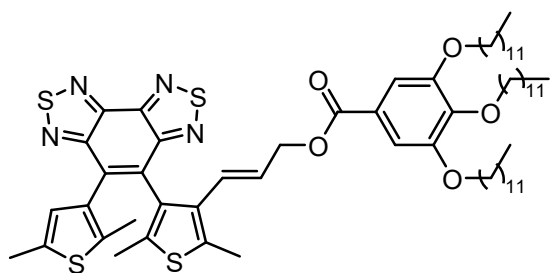

### <Chromatogram>

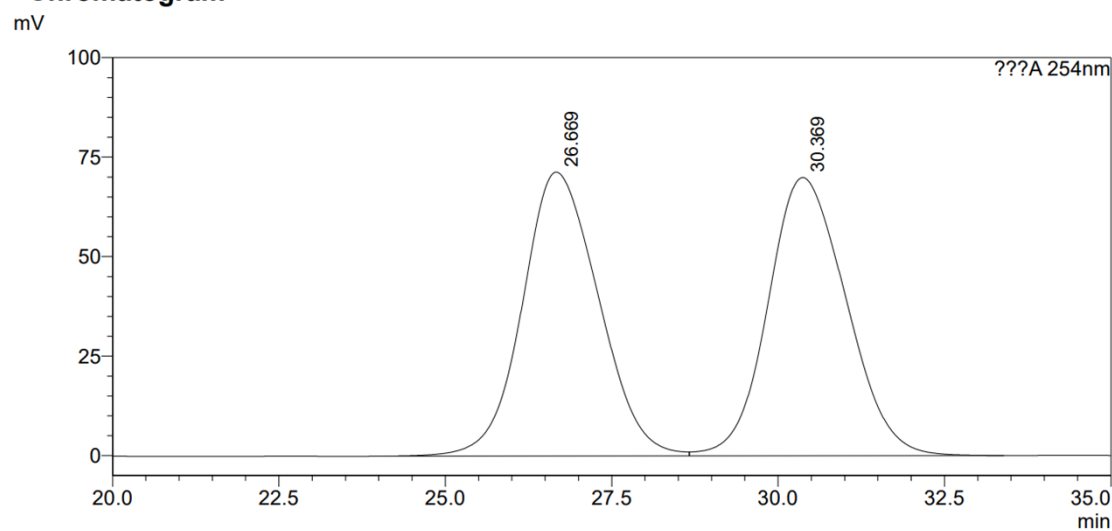

### <Peak Table>

??A 254nm

| Peak# | Ret. Time | Area     | Height | Area%   |
|-------|-----------|----------|--------|---------|
| 1     | 26.669    | 5683765  | 71329  | 49.847  |
| 2     | 30.369    | 5718585  | 69901  | 50.153  |
| Total |           | 11402351 | 141230 | 100.000 |

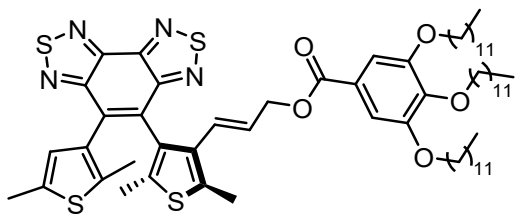

**<Chromatogram>**

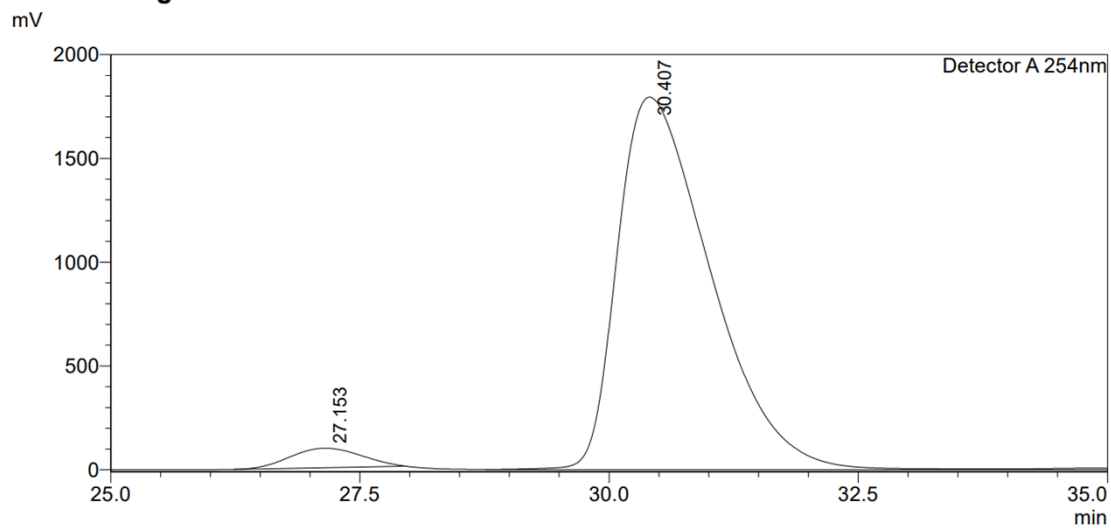

**<Peak Table>**

Detector A 254nm

| Peak# | Ret. Time | Area      | Height  | Area%   |
|-------|-----------|-----------|---------|---------|
| 1     | 27.153    | 4675716   | 94014   | 3.840   |
| 2     | 30.407    | 117082244 | 1795199 | 96.160  |
| Total |           | 121757960 | 1889213 | 100.000 |

6b: AD-H, Hex/iPrOH=90/10, rate=1.000 mL/min, 254 nm

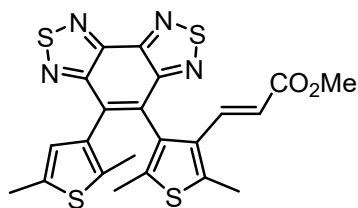

<Chromatogram>

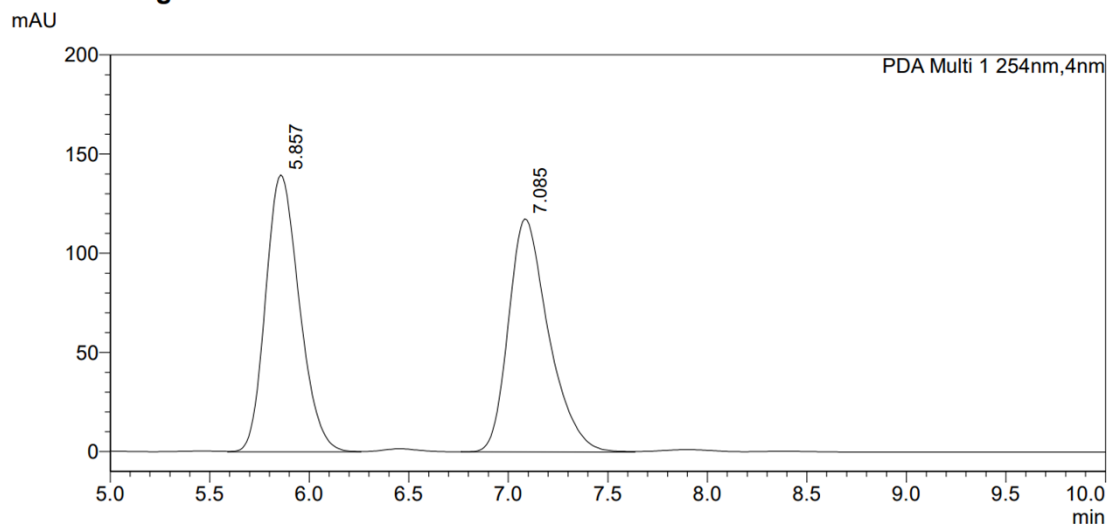

<Peak Table>

PDA Ch1 254nm

| Peak# | Ret. Time | Area    | Height | Area%   |
|-------|-----------|---------|--------|---------|
| 1     | 5.857     | 1649183 | 139657 | 50.026  |
| 2     | 7.085     | 1647497 | 117472 | 49.974  |
| Total |           | 3296680 | 257129 | 100.000 |

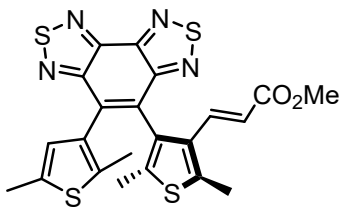

**<Chromatogram>**

mAU

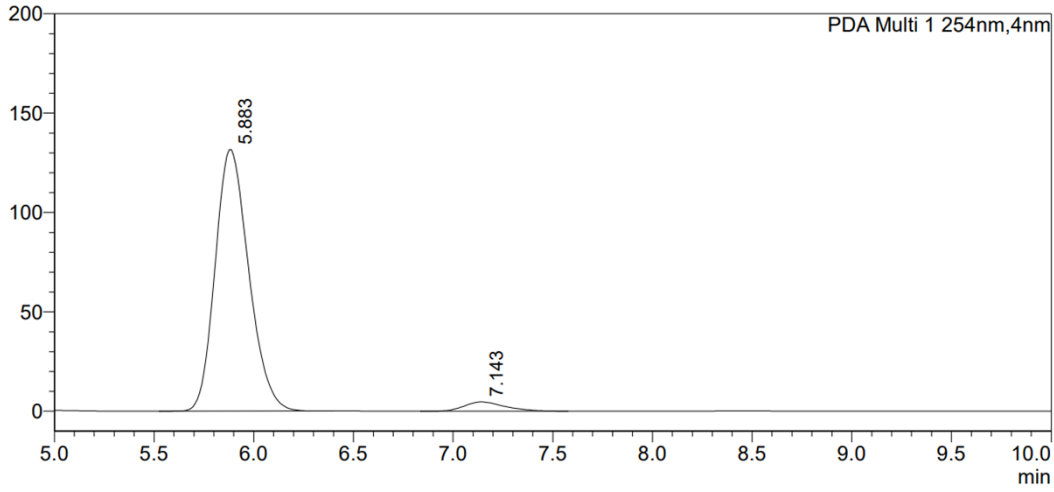

**<Peak Table>**

PDA Ch1 254nm

| Peak# | Ret. Time | Area    | Height | Area%   |
|-------|-----------|---------|--------|---------|
| 1     | 5.883     | 1544026 | 131520 | 95.916  |
| 2     | 7.143     | 65735   | 4665   | 4.084   |
| Total |           | 1609761 | 136185 | 100.000 |

7: OD-H, Hex/iPrOH=97/3, rate=1.000 mL/min, 254 nm

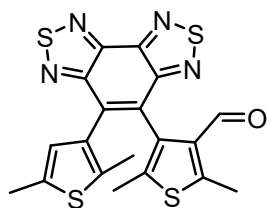

<Chromatogram>

mV

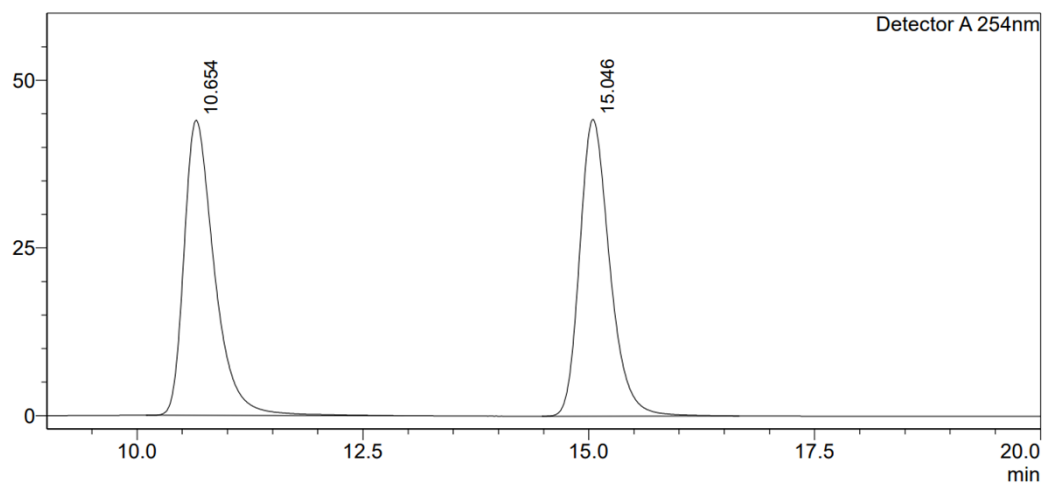

<Peak Table>

Detector A 254nm

| Peak# | Ret. Time | Area    | Height | Area%   |
|-------|-----------|---------|--------|---------|
| 1     | 10.654    | 1028936 | 43985  | 50.120  |
| 2     | 15.046    | 1024024 | 44236  | 49.880  |
| Total |           | 2052960 | 88221  | 100.000 |

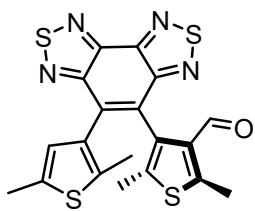

**<Chromatogram>**

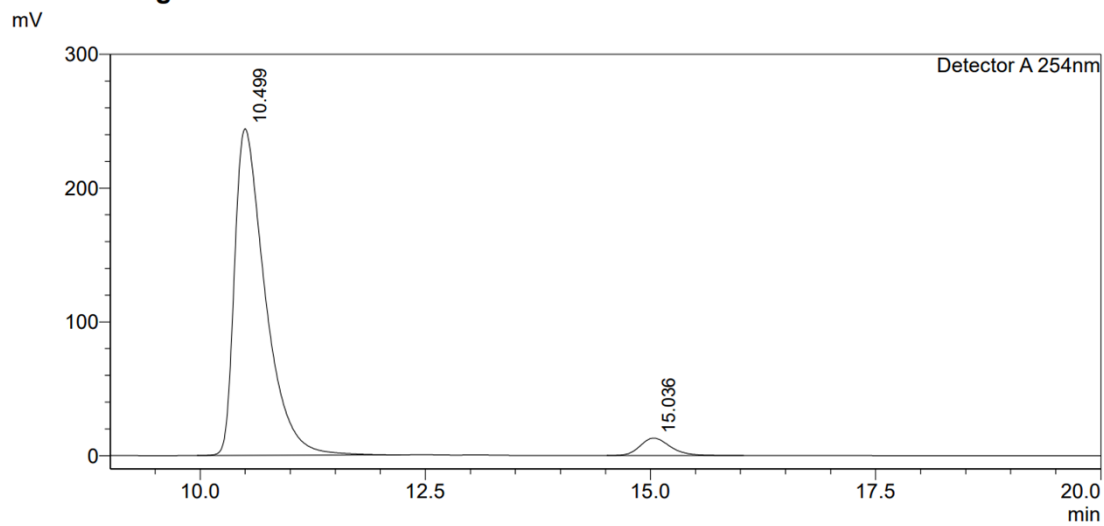

**<Peak Table>**

| Detector A 254nm |           |         |        |         |
|------------------|-----------|---------|--------|---------|
| Peak#            | Ret. Time | Area    | Height | Area%   |
| 1                | 10.499    | 5780798 | 244253 | 95.071  |
| 2                | 15.036    | 299735  | 12974  | 4.929   |
| Total            |           | 6080534 | 257227 | 100.000 |



9: AD-H, Hex/iPrOH=90/10, rate=1.000 mL/min, 254 nm

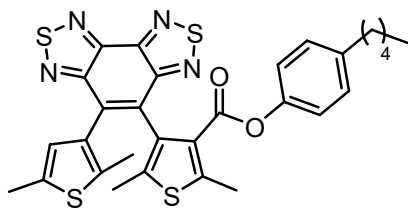

<Chromatogram>

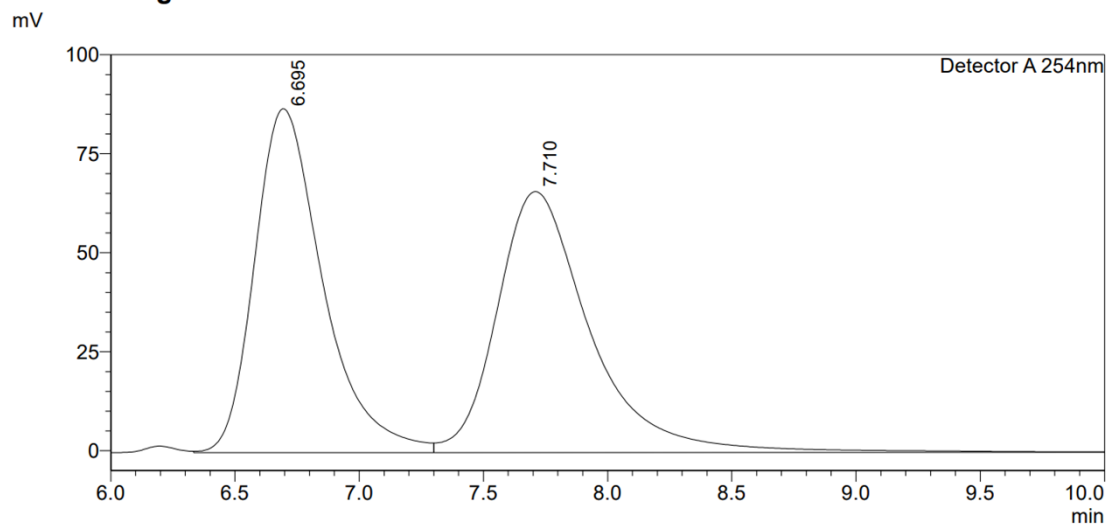

<Peak Table>

| Peak# | Ret. Time | Area    | Height | Area%   |
|-------|-----------|---------|--------|---------|
| 1     | 6.695     | 1661849 | 86839  | 49.054  |
| 2     | 7.710     | 1725966 | 65905  | 50.946  |
| Total |           | 3387815 | 152744 | 100.000 |

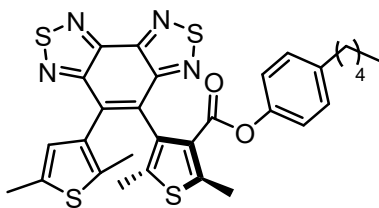

**<Chromatogram>**

mV

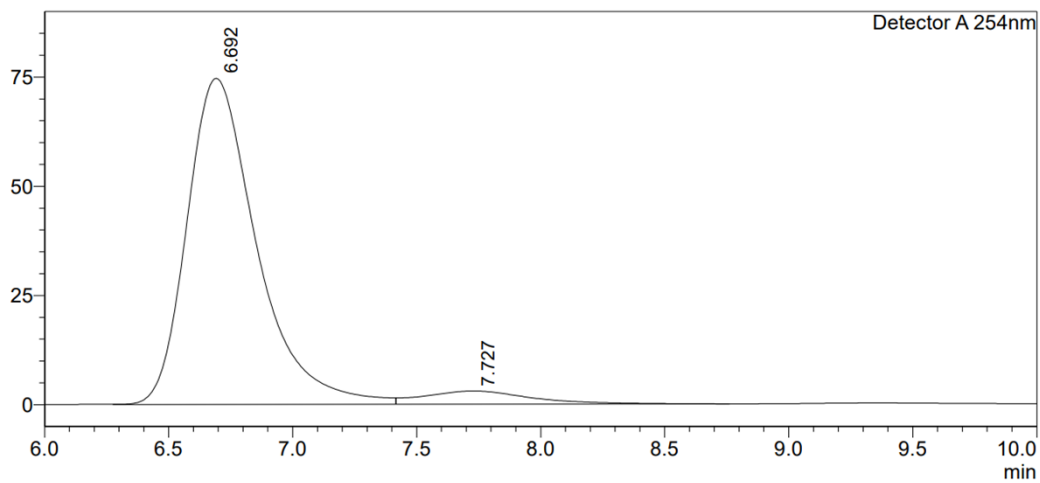

**<Peak Table>**

Detector A 254nm

| Peak# | Ret. Time | Area    | Height | Area%   |
|-------|-----------|---------|--------|---------|
| 1     | 6.692     | 1458519 | 74668  | 94.223  |
| 2     | 7.727     | 89425   | 3004   | 5.777   |
| Total |           | 1547945 | 77672  | 100.000 |

10: IF-3, Hex/iPrOH=95/5, rate=1.000 mL/min, 254 nm

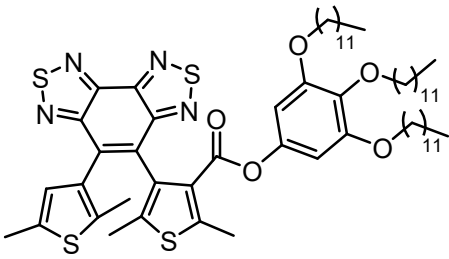

**<Chromatogram>**

mAU

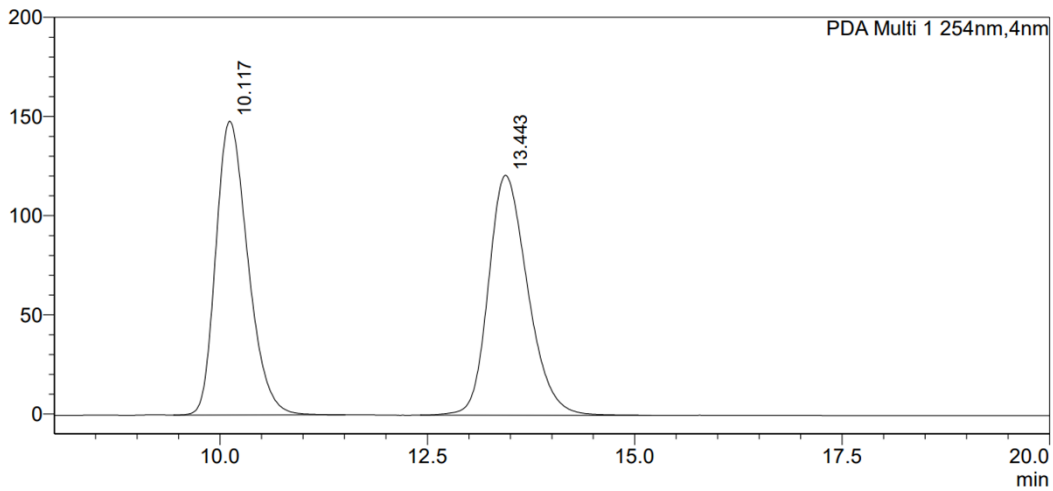

**<Peak Table>**

PDA Ch1 254nm

| Peak# | Ret. Time | Area    | Height | Area%   |
|-------|-----------|---------|--------|---------|
| 1     | 10.117    | 3984818 | 148185 | 50.018  |
| 2     | 13.443    | 3981882 | 120943 | 49.982  |
| Total |           | 7966700 | 269128 | 100.000 |

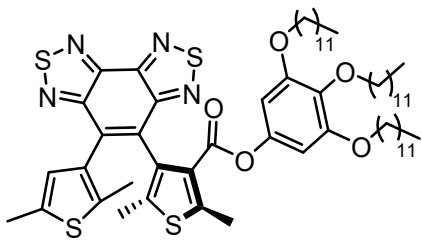

**<Chromatogram>**

mAU

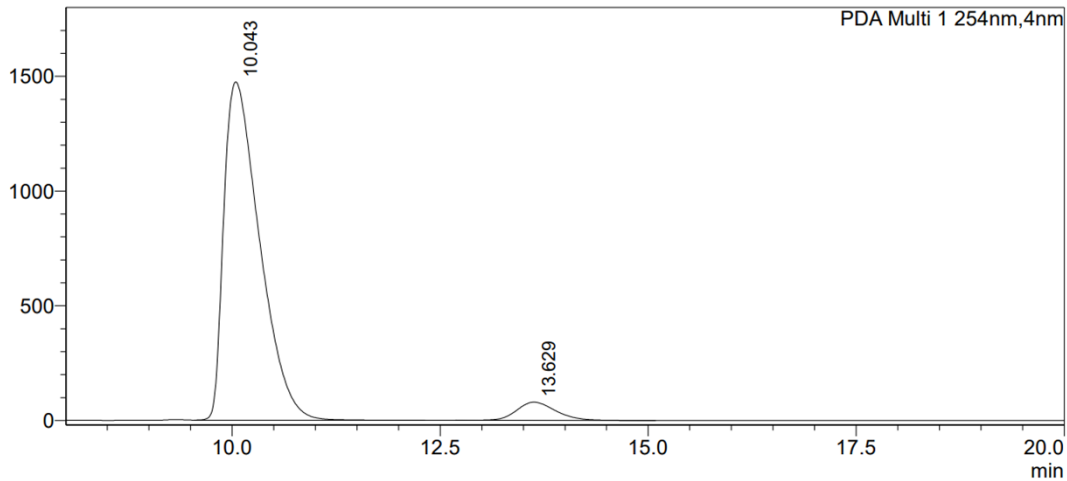

**<Peak Table>**

PDA Ch1 254nm

| Peak# | Ret. Time | Area     | Height  | Area%   |
|-------|-----------|----------|---------|---------|
| 1     | 10.043    | 44301553 | 1475386 | 94.444  |
| 2     | 13.629    | 2606179  | 79666   | 5.556   |
| Total |           | 46907732 | 1555051 | 100.000 |

11: IC, Hex/iPrOH=97/3, rate=1.000 mL/min, 254 nm

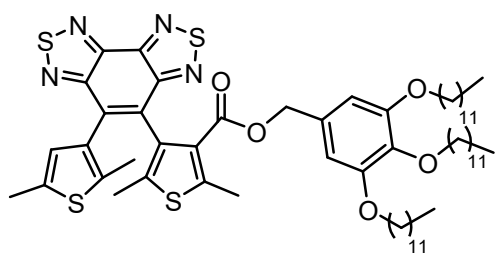

<Chromatogram>

mAU

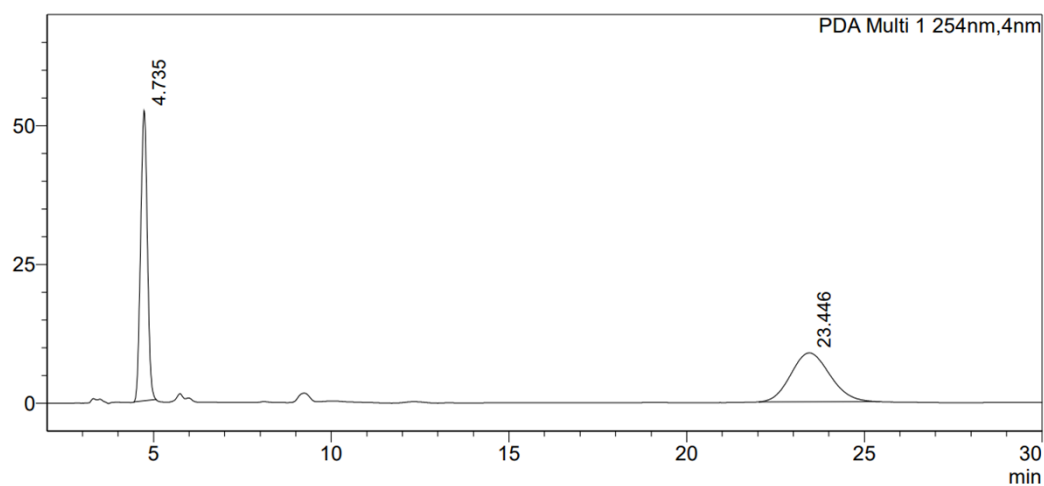

<Peak Table>

PDA Ch1 254nm

| Peak# | Ret. Time | Area    | Height | Area%   |
|-------|-----------|---------|--------|---------|
| 1     | 4.735     | 689505  | 52219  | 50.605  |
| 2     | 23.446    | 673015  | 8809   | 49.395  |
| Total |           | 1362520 | 61028  | 100.000 |

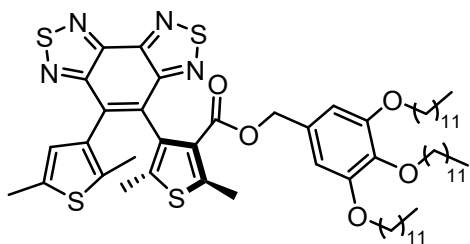

### <Chromatogram>

mAU

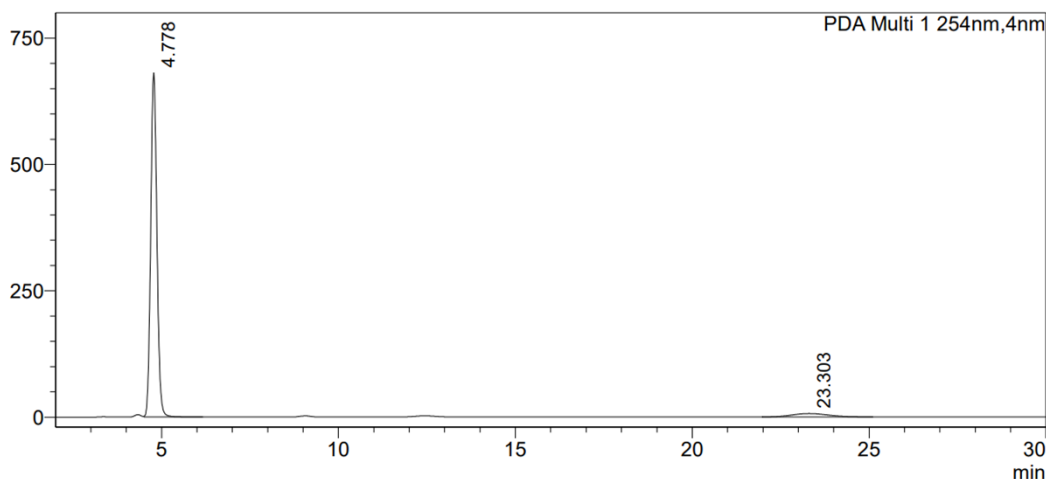

### <Peak Table>

PDA Ch1 254nm

| Peak# | Ret. Time | Area    | Height | Area%   |
|-------|-----------|---------|--------|---------|
| 1     | 4.778     | 8322975 | 681713 | 94.438  |
| 2     | 23.303    | 490225  | 6783   | 5.562   |
| Total |           | 8813199 | 688496 | 100.000 |

## 10. References

- S1 T. Sumi, Y. Takagi, A. Yagi, M. Morimoto and M. Irie, *Chem. Commun.* 2014, **50**, 3928-3930.
- S2 K. Uchida, E. Tsuchida, Y. Aoi and S. Nakamura, Irie, M. *Chem. Lett.* 1999, **28**, 63-64.
- S3 Gaussian 16, Revision C.01, Frisch, M. J.; Trucks, G. W.; Schlegel, H. B.; Scuseria, G. E.; Robb, M. A.; Cheeseman, J. R.; Scalmani, G.; Barone, V.; Petersson, G. A.; Nakatsuji, H.; Li, X.; Caricato, M.; Marenich, A. V.; Bloino, J.; Janesko, B. G.; Gomperts, R.; Mennucci, B.; Hratchian, H. P.; Ortiz, J. V.; Izmaylov, A. F.; Sonnenberg, J. L.; Williams-Young, D.; Ding, F.; Lipparini, F.; Egidi, F.; Goings, J.; Peng, B.; Petrone, A.; Henderson, T.; Ranasinghe, D.; Zakrzewski, V. G.; Gao, J.; Rega, N.; Zheng, G.; Liang, W.; Hada, M.; Ehara, M.; Toyota, K.; Fukuda, R.; Hasegawa, J.; Ishida, M.; Nakajima, T.; Honda, Y.; Kitao, O.; Nakai, H.; Vreven, T.; Throssell, K.; Montgomery, J. A., Jr.; Peralta, J. E.; Ogliaro, F.; Bearpark, M. J.; Heyd, J. J.; Brothers, E. N.; Kudin, K. N.; Staroverov, V. N.; Keith, T. A.; Kobayashi, R.; Normand, J.; Raghavachari, K.; Rendell, A. P.; Burant, J. C.; Iyengar, S. S.; Tomasi, J.; Cossi, M.; Millam, J. M.; Klene, M.; Adamo, C.; Cammi, R.; Ochterski, J. W.; Martin, R. L.; Morokuma, K.; Farkas, O.; Foresman, J. B.; Fox, D. J. Gaussian, Inc., Wallingford CT, 2016.
- S4 T. Lu, Q.-X Chen, *Computational and Theoretical Chemistry* 2021, **1200**, 113249.
- S5 D. Podolsky, O. Banji, and P. Rudquist, *Liquid Crystals.* 2008, **35**, 789-791.
